# Supplementary material
Source: HighWire-hosted journal article supplement (doi:10.1101/rna.080488.125)
Supplement: Supplemental_SChLAP1_appendix2_phyloPscores.xlsx [file Supplemental_SChLAP1_appendix2_phyloPscores.xlsx]

## Sheet: SChLAP1 Iso4 PhyloP 30-way
fixedStep chrom=UserInput start=0 step=1 span=1
0.161339
0.12422
0.161339
0.161339
0.161339
0.161339
0.161339
0.161339
0.161339
0.161339
0.161339
0.12422
0.161339
0.161339
0.161339
0.161339
0.161339
0.12422
0.161339
0.12422
0.161339
0.12422
-1.10068
0.12422
-1.24915
-3.402
-1.32339
-1.17491
0.161339
0.161339
-1.21203
0.161339
0.161339
0.12422
-1.39762
0.161339
0.12422
0.161339
0.161339
0.12422
0.161339
0.161339
-1.28627
0.161339
-1.28627
0.161339
0.12422
0.12422
0.161339
0.161339
0.161339
0.161339
0.161339
0.12422
-1.28627
0.161339
0.161339
0.12422
0.161339
0.161339
0.161339
0.161339
0.12422
0.12422
0.161339
0.12422
0.161339
0.161339
-1.21203
0.12422
0.12422
-1.32339
0.161339
0.12422
-1.24915
-1.17491
0.161339
-1.21203
0.161339
0.161339
-1.17491
0.161339
0.161339
0.12422
-1.17491
0.161339
0.161339
0.12422
0.161339
0.161339
-1.28627
0.161339
0.12422
0.12422
-1.3605
0.161339
0.161339
-1.24915
0.161339
0.12422
-3.10506
-1.24915
-3.10506
-1.21203
0.12422
-1.24915
0.161339
0.161339
0.161339
0.161339
0.161339
0.161339
0.161339
0.12422
0.161339
0.161339
0.161339
0.161339
0.161339
0.12422
0.161339
-1.24915
0.161339
0.12422
-1.10068
-1.28627
0.12422
-1.17491
0.12422
-1.24915
0.161339
0.161339
0.161339
0.161339
0.161339
0.12422
0.161339
0.161339
-1.28627
0.161339
0.161339
0.12422
0.161339
0.161339
0.12422
-1.1378
0.12422
0.161339
0.12422
0.12422
-1.21203
0.161339
0.161339
-1.17491
0.12422
0.12422
0.161339
0.161339
0.12422
0.161339
0.161339
0.161339
0.161339
0.12422
0.12422
0.161339
0.12422
-1.28627
0.161339
0.161339
0.12422
0.12422
0.12422
0.161339
0.12422
0.12422
0.12422
0.12422
0.12422
0.12422
0.12422
0.12422
0.12422
0.12422
-1.21203
0.161339
0.161339
0.161339
0.12422
0.161339
0.12422
0.12422
0.161339
0.161339
0.161339
0.12422
0.161339
0.12422
0.161339
0.161339
0.12422
0.161339
0.161339
0.161339
0.161339
0.12422
0.161339
0.161339
0.12422
0.161339
0.161339
0.161339
0.161339
0.161339
-1.17491
0.161339
0.161339
0.12422
0.161339
0.161339
0.161339
0.12422
0.161339
0.12422
-1.39762
0.161339
0.161339
0.161339
0.12422
0.161339
0.12422
0.161339
0.12422
0.12422
0.161339
0.12422
0.12422
0.161339
0.161339
0.161339
0.161339
-1.10068
0.12422
0.161339
0.161339
0.12422
0.161339
0.161339
0.161339
0.161339
0.161339
0.12422
-2.77099
0.12422
0.161339
0.12422
0.161339
0.12422
-2.91946
0.161339
0.12422
0.161339
0.161339
0.161339
0.161339
0.161339
0.161339
0.12422
0.12422
-1.21203
0.12422
0.161339
0.161339
0.12422
0.161339
0.161339
0.12422
0.161339
0.161339
0.161339
0.12422
0.161339
0.161339
0.161339
0.161339
0.161339
0.12422
0.12422
-3.402
0.161339
0.161339
0.161339
0.161339
0.161339
0.161339
0.161339
0.12422
-1.28627
0.161339
0.161339
0.161339
0.161339
0.161339
0.12422
0.12422
0.12422
-1.10068
0.12422
0.12422
0.161339
-1.17491
0.161339
0.161339
0.12422
-3.06794
-1.24915
0.161339
0.161339
0.12422
0.161339
0.12422
0.161339
0.940819
0.792346
0.792346
0.792346
0.0128661
1.08929
0.198457
0.198457
1.12641
0.12422
-0.246961
1.12641
-0.246961
1.312
1.16353
-0.135606
0.175984
-0.173559
0.0885984
-0.741567
0.307063
0.175984
-0.916339
0.175984
0.307063
1.13723
-2.00866
1.13723
1.13723
0.0885984
0.175984
-0.129866
-0.173559
1.312
1.312
-0.0861732
1.13723
0.219677
0.219677
-0.304638
1.312
-0.348331
0.175984
0.307063
0.26337
1.13723
-0.260945
0.132291
-0.304638
1.13723
0.219677
1.13723
0.132291
0.0885984
1.312
1.312
-2.09605
-1.48435
-0.217252
-0.0861732
-0.173559
-0.0861732
-0.916339
-0.0424803
0.26337
1.13723
-0.217252
-0.260945
0.307063
1.00615
1.13723
-0.654181
1.13723
-0.741567
1.312
1.00615
0.0885984
0.307063
-0.217252
0.219677
-1.96497
0.26337
1.00615
0.132291
1.13723
-0.129866
1.13723
1.09354
1.09354
0.219677
1.00615
1.312
1.312
-0.479409
-0.0861732
-0.0861732
-0.260945
-0.960032
1.312
-0.741567
1.312
1.13723
-0.304638
-0.260945
1.13723
1.13723
-0.217252
0.175984
0.132291
1.312
-0.217252
0.0885984
0.962457
-0.173559
0.0449055
0.875071
0.875071
0.0012126
-0.0424803
-0.304638
-0.828953
0.962457
0.0012126
-1.09111
1.09354
0.787685
-0.566795
0.0885984
-0.654181
-0.566795
-0.392024
-1.04742
0.875071
-0.523102
0.0449055
-0.0424803
0.0012126
-0.479409
0.831378
0.875071
0.0012126
0.875071
0.175984
-1.65912
0.0449055
0.175984
0.875071
1.09354
0.962457
0.962457
0.0012126
0.962457
0.0885984
0.0449055
-1.09111
0.962457
-1.61543
-0.435717
-0.0861732
-0.217252
-0.348331
0.875071
-0.129866
-0.566795
1.09354
-0.916339
-0.392024
0.0012126
0.962457
0.0449055
-0.0424803
0.0012126
-1.00372
-0.523102
-0.304638
1.09354
0.132291
-0.435717
0.962457
-0.392024
0.0885984
-0.479409
-0.479409
0.0885984
-0.129866
-0.348331
1.09354
-0.479409
-0.392024
0.0012126
-0.0424803
0.132291
-0.610488
0.962457
0.175984
0.175984
0.962457
0.0885984
0.875071
0.656606
0.525528
-0.304638
0.56922
0.56922
0.56922
-0.260945
0.56922
-0.217252
0.56922
0.525528
-0.260945
0.612913
0.0801024
0.0349764
0.0349764
0.847244
-0.416283
0.937496
0.847244
0.937496
-2.22132
-1.04805
0.982622
0.847244
0.847244
0.125228
-0.326032
-0.280906
0.0801024
0.0801024
0.0349764
-0.326032
-0.326032
-0.326032
-0.957795
0.937496
0.0801024
0.125228
-2.13107
-0.461409
0.0801024
-0.0101496
0.847244
-0.822417
0.0349764
0.0349764
1.02775
-0.461409
0.125228
1.02775
0.0801024
0.125228
0.89237
0.89237
-0.957795
-0.0101496
-1.18343
-0.0101496
0.89237
0.89237
-0.0101496
0.89237
0.89237
1.02775
0.89237
-0.100402
-0.371157
-0.326032
-0.732165
0.847244
0.125228
0.0801024
0.170354
1.118
-1.04805
-1.18343
0.847244
0.0801024
-0.957795
-0.687039
-2.62746
-0.416283
0.0801024
0.847244
-2.22132
0.937496
-0.0101496
1.118
0.170354
1.118
0.982622
-0.326032
0.0349764
-1.09317
-0.280906
1.118
-1.40906
-1.40906
0.0801024
0.982622
0.0801024
-0.371157
0.0801024
1.07287
-0.326032
1.07287
-1.77006
-0.461409
0.0349764
-0.371157
-1.00292
1.07287
-1.09317
-0.326032
-1.45418
0.89237
-0.867543
-0.596787
0.802118
0.125228
0.0349764
0.0349764
-0.0101496
0.937496
0.937496
-0.0101496
-1.00292
0.847244
0.0349764
-0.280906
0.0801024
-2.67258
-0.190654
-0.326032
0.125228
0.937496
-0.0552756
-0.0552756
0.66674
0.89237
0.802118
-0.145528
0.756992
-0.190654
-0.0101496
-0.912669
0.125228
-0.551661
-0.371157
-0.371157
-0.284921
-0.155189
-0.155189
0.525905
0.493472
-0.90115
0.623205
0.688071
0.752937
0.655638
-0.187622
0.590772
0.655638
0.688071
-0.0903228
0.688071
-0.0903228
0.752937
-0.187622
-0.122756
0.590772
0.752937
-0.0578898
-0.0903228
-0.674118
-0.155189
0.590772
0.590772
0.752937
-0.284921
0.590772
-0.122756
0.655638
-0.187622
-1.74441
0.752937
-0.122756
0.655638
0.720504
0.752937
-0.187622
0.752937
-0.155189
-0.0578898
0.688071
-0.220055
0.590772
0.752937
-0.771417
-0.155189
0.752937
-0.0903228
0.752937
-0.155189
-0.284921
0.752937
-0.0903228
-0.0578898
0.752937
0.752937
0.655638
-0.771417
0.752937
0.590772
0.752937
0.752937
-0.122756
-1.87414
-0.122756
0.655638
-0.0903228
-0.0578898
0.655638
-0.0903228
0.752937
0.169142
0.169142
0.169142
0.136709
0.169142
-0.0903228
-0.122756
-0.122756
-0.284921
-0.738984
-0.0578898
-0.80385
-0.122756
-0.0903228
-0.155189
0.688071
-0.122756
0.752937
0.752937
0.688071
0.752937
-0.544386
-0.738984
0.655638
-0.609252
-0.220055
-1.58224
-0.0578898
0.688071
-0.544386
0.525905
-0.220055
-0.284921
0.525905
-0.252488
-0.349787
0.623205
0.493472
-0.447087
-0.220055
0.558339
-0.252488
-1.42008
0.623205
-0.155189
0.525905
0.558339
0.623205
0.623205
0.558339
-0.155189
0.493472
-0.284921
0.493472
-0.155189
0.558339
-0.284921
-0.284921
0.525905
0.493472
-2.06874
-0.252488
-0.220055
0.558339
-0.187622
-0.155189
-0.349787
-0.966016
-0.284921
-0.155189
-0.220055
0.623205
-0.90115
0.623205
0.493472
-0.317354
0.623205
0.493472
-0.90115
0.525905
-1.09575
-0.284921
0.493472
-0.966016
-0.868717
0.623205
0.623205
0.558339
0.623205
-0.155189
0.558339
0.493472
0.525905
0.558339
-0.252488
-0.252488
-0.220055
-0.317354
0.525905
-0.317354
0.525905
-0.220055
0.493472
0.623205
0.558339
-1.09575
-0.252488
0.623205
-0.155189
-0.220055
0.525905
-0.220055
0.558339
0.623205
-0.317354
0.525905
0.525905
-0.284921
-0.252488
0.493472
0.493472
0.623205
-0.155189
0.525905
-0.252488
0.623205
-2.00387
-0.220055
0.623205
-0.187622
-0.220055
0.623205
0.558339
-1.19305
-1.74441
0.558339
0.558339
-0.220055
0.525905
0.558339
0.558339
0.623205
-0.80385
0.623205
-0.252488
0.623205
0.558339
0.558339
0.623205
0.558339
-1.80928
0.525905
0.590772
-0.284921
0.525905
-0.317354
0.590772
-0.252488
-0.155189
-1.06331
0.525905
-0.414654
0.623205
0.525905
0.493472
0.493472
0.461039
0.461039
-0.349787
0.428606
-0.414654
0.623205
-0.284921
-0.738984
-0.220055
0.558339
0.623205
-0.836283
0.493472
0.623205
-0.998449
0.493472
0.623205
0.525905
-0.187622
-0.252488
0.525905
-0.187622
0.623205
0.623205
0.623205
0.558339
-0.118283
-0.149071
0.836126
-0.580095
-1.22663
-0.641669
-0.0567087
0.743764
0.620614
0.712976
0.712976
0.836126
-0.672457
-0.580095
-0.734031
0.712976
0.651402
-0.0567087
0.743764
0.743764
-0.0567087
-0.0567087
0.00486614
-1.47293
-0.0874961
-0.0874961
-0.118283
-1.25742
0.00486614
0.836126
-0.795606
-0.764819
-0.764819
-2.58128
-0.672457
0.712976
0.774551
0.712976
0.712976
-0.118283
-1.25742
-0.118283
0.712976
-0.549307
0.651402
-0.118283
0.743764
-0.210646
0.743764
0.836126
0.743764
0.836126
-0.118283
0.836126
-0.456945
0.651402
0.836126
0.00486614
0.00486614
0.00486614
-0.610882
-0.0567087
0.836126
0.836126
0.712976
0.743764
0.836126
0.836126
-0.0567087
0.151504
0.10548
-0.308732
0.933905
0.979929
-1.2292
0.151504
0.841858
0.841858
-0.262709
0.10548
-0.170661
0.0594567
0.0594567
0.841858
-2.51787
-1.36728
-0.262709
0.933905
0.979929
-0.170661
-0.722945
0.0594567
0.151504
0.933905
0.841858
0.151504
0.979929
-0.446803
-0.216685
0.841858
0.933905
-0.308732
0.10548
0.10548
1.118
-0.0325905
0.0134331
0.151504
0.10548
0.933905
0.933905
1.118
-0.768969
0.841858
0.151504
0.979929
1.118
-0.262709
0.979929
1.118
-0.814992
1.118
1.118
0.0594567
0.979929
-0.446803
0.933905
0.933905
0.0134331
0.933905
0.933905
-0.0786142
0.0134331
0.933905
0.933905
0.0594567
0.0134331
-1.27523
0.10548
1.118
1.118
1.118
0.151504
-0.262709
0.151504
0.151504
0.0594567
-0.768969
1.118
-1.13716
-0.308732
-0.308732
-1.50535
-1.04511
0.0134331
0.151504
-0.0325905
0.10548
0.0594567
-0.722945
0.151504
-0.40078
-0.40078
1.02595
0.795835
0.795835
1.02595
-0.0325905
0.795835
-0.0786142
-0.0325905
0.887882
-0.0325905
-0.0325905
0.795835
0.887882
0.0134331
0.0134331
-0.40078
0.887882
-0.0325905
1.02595
-0.446803
-0.262709
0.0134331
-0.262709
1.02595
0.10548
0.0134331
0.0594567
-0.861016
0.10548
0.887882
0.887882
-0.40078
-0.0325905
0.10548
-0.446803
-0.262709
0.0134331
0.0594567
0.0594567
0.0594567
0.887882
-0.0325905
0.887882
0.0594567
0.0594567
0.10548
0.151504
0.841858
1.118
0.151504
0.0134331
-0.40078
-0.308732
-0.308732
1.118
1.118
-0.262709
0.933905
0.0134331
0.0134331
0.841858
0.151504
0.933905
0.0134331
1.118
0.151504
0.0594567
0.933905
0.0134331
0.749811
0.0134331
-0.354756
-0.40078
0.0134331
0.933905
0.151504
1.118
0.0134331
0.0134331
0.0594567
0.841858
0.151504
0.933905
0.0594567
0.0134331
0.0594567
-0.907039
-0.40078
-0.446803
-0.40078
0.887882
0.10548
0.933905
0.0594567
1.118
-2.1957
0.933905
0.0134331
-1.04511
0.933905
-0.0786142
0.933905
0.933905
-0.262709
0.151504
-0.446803
0.0594567
0.151504
1.118
-0.0325905
-0.40078
-2.51787
-0.953063
0.151504
0.841858
0.933905
0.933905
-0.354756
-0.216685
0.0134331
-0.630898
-2.3886
0.0310236
0.137772
1.0985
0.956173
-0.395968
0.0310236
0.0666063
0.956173
1.0985
-0.395968
0.956173
-0.324803
0.0310236
0.102189
1.0985
1.0985
0.0666063
-0.253638
-0.894126
0.102189
-0.822961
1.02734
0.956173
1.0985
0.0666063
0.956173
-0.28922
0.173354
0.137772
0.0666063
0.0666063
-0.218055
-0.894126
0.0666063
-0.467134
0.0310236
-0.00455905
-0.965291
0.849425
0.956173
0.956173
0.991756
0.0666063
1.0985
0.102189
-0.395968
-0.502717
-0.929709
-0.00455905
0.173354
0.956173
0.956173
0.173354
0.956173
-0.467134
-0.395968
0.991756
0.102189
1.0985
1.0985
0.956173
-0.395968
-0.395968
-0.751795
0.102189
0.0666063
0.885008
-0.00455905
1.02734
-0.68063
-0.0401417
-0.609465
0.885008
-1.32112
-0.0757244
0.885008
-0.0401417
-0.0401417
0.885008
-0.0757244
0.849425
-0.00455905
0.991756
0.77826
0.77826
-0.787378
-0.822961
0.849425
0.885008
0.849425
0.849425
-0.538299
0.0310236
-0.0401417
0.849425
-0.858543
0.849425
0.885008
0.102189
0.991756
0.0310236
-0.467134
0.102189
0.102189
-0.716213
0.280102
0.315685
0.315685
0.315685
-2.35302
-0.573882
-0.395968
0.0310236
-0.858543
-0.28922
0.0666063
0.991756
0.991756
0.102189
-0.360386
-0.467134
0.0310236
-0.0401417
0.102189
0.885008
0.991756
-0.395968
-0.395968
0.991756
-1.07204
0.0666063
0.885008
0.885008
0.707094
-1.1432
-0.787378
-0.111307
0.671512
-0.360386
0.458016
0.422433
0.458016
-0.395968
-0.360386
-0.360386
0.422433
0.422433
0.422433
0.422433
-0.395968
0.38685
0.422433
0.422433
-0.395968
-0.360386
0.422433
0.38685
0.38685
0.38685
0.38685
0.458016
0.38685
-2.3886
-0.431551
0.458016
0.458016
0.458016
0.422433
0.458016
0.422433
0.38685
0.458016
0.422433
0.38685
0.422433
0.422433
0.422433
0.458016
0.458016
0.422433
-0.431551
0.422433
0.422433
-0.324803
0.422433
-2.3886
0.422433
0.38685
0.38685
0.38685
0.458016
0.422433
0.458016
0.458016
0.422433
0.422433
0.38685
0.38685
0.38685
0.458016
-1.39228
-2.03277
0.280102
0.280102
0.280102
0.422433
-0.360386
0.422433
0.422433
0.422433
0.422433
0.458016
0.422433
-0.360386
0.422433
0.458016
-0.467134
-0.467134
-0.716213
-1.10762
0.422433
-1.21437
-1.21437
0.422433
0.422433
0.458016
-1.24995
0.458016
-0.395968
0.458016
0.458016
0.422433
0.422433
0.422433
-0.324803
-0.324803
0.422433
0.38685
-0.324803
0.422433
0.422433
0.422433
-0.360386
-0.360386
0.422433
-0.431551
-0.360386
-0.395968
0.422433
0.422433
0.38685
0.38685
-0.467134
0.38685
-0.467134
0.458016
0.422433
0.458016
0.38685
0.422433
-0.324803
-0.395968
0.422433
0.38685
0.422433
-0.467134
-3.207
0.422433
-0.360386
0.422433
-0.395968
0.458016
-0.360386
0.422433
0.422433
0.458016
0.458016
0.422433
0.458016
0.458016
0.422433
0.422433
-0.467134
0.422433
-0.431551
-0.324803
0.38685
0.458016
0.458016
-0.502717
0.458016
-0.395968
0.38685
0.422433
0.422433
0.458016
-0.431551
-0.360386
-0.360386
0.422433
0.422433
0.422433
-0.431551
0.458016
-0.431551
-0.360386
0.458016
0.422433
0.422433
0.422433
-1.24995
0.458016
0.458016
-0.324803
-0.467134
-1.3567
0.38685
0.38685
-0.431551
0.422433
0.422433
-1.39228
-0.68063
0.38685
-2.21069
0.422433
0.422433
0.422433
-0.467134
0.422433
0.38685
0.422433
0.38685
0.458016
0.422433
0.422433
0.38685
0.422433
0.38685
0.422433
-1.24995
0.38685
0.422433
-0.467134
0.422433
0.422433
-1.10762
0.422433
0.38685
0.422433
0.422433
0.422433
-1.28554
-1.17879
0.422433
-0.467134
0.458016
-0.395968
0.422433
0.422433
-0.360386
0.458016
0.422433
0.458016
0.38685
-0.324803
-0.395968
-0.360386
0.38685
0.38685
0.422433
0.422433
0.422433
0.38685
0.458016
-0.467134
0.38685
0.422433
0.422433
0.351268
0.38685
0.351268
0.38685
0.458016
0.38685
0.38685
0.458016
0.422433
-0.395968
0.458016
-0.395968
0.422433
0.422433
0.422433
0.422433
0.458016
0.422433
0.422433
-0.467134
0.38685
0.422433
0.38685
0.38685
-0.467134
0.38685
0.458016
0.422433
0.38685
0.38685
-0.324803
-2.49535
-1.21437
-1.21437
-0.395968
-0.395968
-0.324803
-1.10762
0.38685
0.422433
0.422433
0.422433
-2.10394
0.458016
0.422433
-0.431551
0.38685
-1.3567
0.458016
0.422433
0.422433
0.458016
0.458016
-0.324803
0.38685
-0.467134
0.422433
-0.467134
0.422433
0.422433
-0.395968
0.38685
0.458016
-0.467134
0.422433
0.422433
0.458016
-1.24995
0.458016
0.458016
0.458016
-0.395968

## Sheet: SChLAP1 Iso 4 phyloP 447-way
fixedStep chrom=UserInput start=0 step=1 span=1
0.183
0.183
0.172
0.172
0.172
0.172
0.172
0.172
0.183
0.172
0.183
0.183
0.172
0.183
0.172
0.172
0.172
0.183
0.172
0.183
0.172
0.183
-1.121
0.183
-1.123
-1.068
-1.107
-1.098
0.172
0.2
-0.942
-2.291
-2.576
-2.496
-1.039
0.214
0.214
-2.373
-2.497
0.214
0.2
0.2
-0.942
0.2
-0.942
0.2
0.214
-2.496
0.2
-0.972
-1.129
-1.129
0.212
-1.089
-0.929
-1.005
-1.089
-0.913
-2.264
-1.094
0.184
-1.1
-1.078
0.184
0.173
0.184
-1.039
0.172
-1.085
0.183
0.184
-2.832
-1.094
0.184
-2.442
-2.586
-1.041
-2.504
0.173
-1.041
-1.136
0.17
0.17
0.181
-1.109
0.17
0.17
0.181
0.17
0.17
-1.073
0.17
0.181
0.181
-1.171
0.181
0.17
-1.108
0.181
0.181
-2.369
-1.006
-4.035
-2.356
-2.332
-1.006
0.189
0.189
0.189
-1.034
-0.986
0.192
0.204
0.204
0.192
-0.956
0.192
0.192
0.192
0.204
0.192
-3.805
0.192
0.204
-2.373
-0.972
-2.327
-3.806
-0.956
-2.348
0.192
0.192
0.204
0.204
0.192
0.204
0.192
0.204
-0.982
0.192
0.204
-0.95
0.192
0.192
0.204
-1.067
0.204
0.192
0.204
0.204
-1.028
0.204
0.192
-0.961
0.204
0.204
0.192
0.204
-0.956
0.204
0.192
0.204
0.192
0.204
0.204
0.192
0.204
-1.003
0.192
-1.003
0.204
0.204
0.204
0.192
0.204
-0.989
-1.101
0.183
-1.101
0.172
0.183
-1.064
0.172
0.172
-2.518
0.192
0.192
0.192
0.204
0.172
0.183
0.183
0.183
0.172
0.172
0.183
0.172
0.183
0.172
0.172
0.183
-1.413
0.138
0.129
0.129
0.138
0.129
0.129
0.138
0.172
0.183
0.172
0.172
0.183
-1.072
0.172
0.172
0.183
0.172
0.192
0.192
0.204
0.192
0.204
-2.545
-0.964
0.204
0.192
0.204
-1.003
-2.29
-0.961
-0.964
-0.914
-0.917
0.214
-0.914
0.2
0.2
0.2
0.197
-0.999
0.214
0.2
-0.966
0.214
0.2
-2.22
0.2
0.2
0.2
0.214
-0.981
0.214
0.2
0.214
-0.966
0.214
-9.009
0.214
-0.917
-0.914
0.2
-0.914
0.214
0.214
0.2
0.214
0.214
-0.942
0.214
-3.699
0.214
0.214
0.2
0.2
0.214
0.2
0.2
0.2
0.214
0.2
0.2
0.214
0.2
0.2
0.214
0.2
-2.404
0.2
0.203
0.191
0.203
0.191
-0.946
0.2
0.214
-0.933
-0.97
0.2
0.214
0.2
0.2
0.214
0.214
0.214
-2.486
0.214
0.214
0.2
-2.392
0.2
0.2
0.214
-2.255
-0.958
0.214
0.2
0.214
0.2
0.214
0.2
0.2
0.2
0.2
0.2
0.12
0.566
0.954
1.023
1.307
0.698
0.441
1.123
-0.198
0.856
1.476
0.506
0.349
-0.268
-0.005
-0.729
1.35
-0.17
-0.158
0.008
-0.688
0.198
0.398
1.414
1.849
2.215
0.788
0.578
0.781
3.523
5.091
0.676
0.899
0.058
-1.929
-0.213
1.197
-5.256
-0.237
1.205
-0.539
1.651
0.791
-0.539
0.964
2.22
1.261
0.851
1.43
-0.516
0.81
-0.048
-1.744
-0.67
-0.403
-0.413
-0.244
0.453
0.505
1.034
0.153
0.371
-0.972
0.377
1.076
-0.526
0.298
-1.955
4.623
-0.084
0.477
-0.041
-0.161
0.568
-0.129
0.034
-2.099
0.559
-1.037
0.379
0.03
-0.929
-0.212
1.061
0.346
0.449
0.185
2.085
0.677
-0.644
0.042
-0.42
-2.01
0.225
0.514
0.017
1.07
0.799
-0.889
-0.831
1.679
1.028
0.189
0.826
0.349
1.072
0.132
-0.165
0.129
0.533
0.889
0.427
0.041
-0.281
-0.684
-0.442
-3.418
0.818
0.82
-0.958
0.346
0.224
-0.223
0.009
-0.714
-0.42
-1.561
-0.339
0.752
-0.44
0.325
0.163
0.271
-2.443
-1.981
0.074
-0.409
0.207
-0.032
-0.421
0.062
-0.174
-0.693
-0.371
1.375
1.792
0.656
0.422
-0.798
-1.257
-0.037
0.994
-0.156
-1.082
-0.257
-0.295
-1.09
0.134
-0.608
0.347
0.642
0.264
0.26
0.147
1.006
0.493
0.637
1.428
-0.506
-2.093
-1.352
1.374
0.702
-0.081
1.048
0.348
0.729
-0.253
0.117
-0.841
-0.542
-0.831
0.084
-0.101
-0.524
-0.361
-0.66
1.635
-2.68
0.284
0.02
1.52
-0.591
0.866
0.35
-0.408
-2.155
-1.533
0.817
0.405
0.198
-0.107
-0.436
0.399
1.114
0.04
2.081
1.155
1.461
1.461
0.441
0.113
0.438
1.461
0.543
-0.544
-0.252
-0.054
0.031
1.166
-0.073
-0.087
-0.242
0.176
0.882
-0.149
-0.081
-1.343
0.249
-0.546
0.962
3.574
0.283
0.856
-1.098
0.071
1.497
1.08
0.49
-0.288
-0.496
-1.825
0.556
0.195
-0.285
0.889
0.192
0.05
0.171
-0.35
-1.194
-0.996
-0.056
1.131
1.439
0.351
-0.912
0.519
0.903
0.545
0.927
1.071
-0.078
0.349
-0.479
-0.068
1.528
1.258
0.641
0.632
-1.292
-0.573
-0.262
0.149
-0.653
-1.494
-0.412
-0.908
0.651
-0.495
-1.588
1.599
0.105
-1.844
-0.323
1.077
2.742
-0.649
0.179
0.241
0.109
1.074
-0.413
-0.636
-0.042
0.263
0.109
-0.423
0.271
1.959
0.006
0.128
-4.233
-0.059
0.446
-1.003
0.479
-0.63
-1.573
-0.885
-1.003
-0.235
0.332
-0.329
-0.103
-0.273
0.158
0.276
0.43
-0.549
0.488
0.078
0.004
0.462
0.339
0.547
-0.907
-2.545
-0.204
0.488
-0.179
0.09
0.93
0.076
1.008
-0.293
1.008
0.127
0.93
0.126
0.93
-1.602
-0.106
-0.009
-0.675
0.383
-0.657
-0.28
0.082
0.069
-1.317
-1.966
0.94
1.019
0.94
0.94
-0.734
1.019
0.067
1.019
1.019
-0.217
-1.295
0.94
-0.217
-0.282
1.019
0.083
0.94
-0.656
-0.67
-0.759
0.132
1.019
0.94
0.128
1.019
0.94
0.94
0.134
-0.887
-0.017
-0.841
0.053
0.007
0.94
0.94
0.94
0.088
0.076
-0.211
-0.218
1.019
0.94
-0.772
0.134
0.94
0.075
0.94
0.134
-0.779
0.082
1.019
0.081
0.082
0.94
0.94
-0.214
0.94
1.019
0.94
0.94
-0.811
-0.32
0.118
0.94
0.134
0.081
-0.282
0.133
0.082
0.214
0.2
0.2
0.2
0.214
-0.214
0.94
-0.234
0.088
-0.657
0.081
0.133
0.94
0.11
-0.724
1.019
-0.654
0.94
0.083
1.019
0.94
-1.338
0.128
-0.282
-0.657
-0.229
-0.305
0.088
1.019
-0.766
0.94
-1.207
-0.66
0.94
0.088
-0.228
0.076
-0.657
-0.761
-0.289
-0.221
-0.273
-0.816
0.94
-0.283
0.081
0.134
0.94
0.94
0.134
0.082
-1.244
-0.235
-0.647
0.082
1.019
0.128
-1.196
0.94
1.019
-0.84
-0.224
0.118
-0.254
-0.219
0.083
-0.276
-0.311
-0.682
0.088
-0.217
0.082
-1.966
0.94
1.019
0.128
0.94
0.129
-0.273
0.078
-0.32
-0.212
-0.211
-0.743
-1.806
0.083
-0.282
1.019
0.94
-0.282
1.019
0.119
0.94
1.019
-0.324
-0.384
-0.214
0.005
0.082
0.128
-0.287
0.118
1.019
0.94
1.019
-1.404
0.091
0.94
0.082
0.128
0.94
-0.649
1.019
0.94
-0.342
0.079
0.94
-2.586
-0.36
1.019
-0.212
0.94
-0.282
-0.291
-0.289
0.078
-2.196
-1.183
0.083
0.128
0.133
0.94
1.019
-1.443
-5.986
0.134
1.019
-2.756
0.94
-0.216
1.019
0.94
-0.743
0.94
0.056
0.92
0.119
-0.236
0.07
0.119
-2.742
0.914
0.063
0.089
-0.214
0.102
0.94
0.13
-0.76
-0.674
0.082
0.041
0.94
-1.345
-0.649
1.019
0.933
0.94
-0.289
0.128
-0.294
-1.31
-2.501
-1.316
0.083
-0.217
0.94
-0.23
0.131
0.935
-0.715
1.019
0.082
0.94
-0.22
-0.763
0.94
0.091
0.94
0.94
0.939
1.018
0.504
-0.537
0.41
0.383
-0.803
-0.786
0.041
-0.166
-0.348
0.578
1.399
0.051
0.107
-0.34
-0.165
1.099
2.468
0.756
-0.01
-0.062
0.737
0.455
1.082
-2.788
-2.423
-1.65
-0.907
-0.457
0.347
0.297
-0.341
-0.998
-5.845
-4.548
-0.397
0.054
-0.429
-0.177
-0.428
-1.815
-0.517
-0.294
-0.266
-2.38
-0.173
-0.155
0.559
-0.11
-1.584
0.687
0.146
0.345
-0.129
1.34
-0.985
-0.604
0.188
-0.387
-0.24
-0.428
-0.444
-1.218
0.234
0.311
-0.253
0.051
0.713
0.114
-2.251
0.117
-1.107
-0.758
1.849
0.575
-0.455
0.522
0.237
-0.376
0.204
0.485
1.758
-0.378
1.034
-0.086
-1.664
0.51
-0.382
0.431
0.144
1.226
0.487
0.713
0.719
0.081
0.484
2.925
0.673
0.44
-1.167
-0.359
0.949
0.286
-0.375
-0.252
0.668
0.009
-0.095
0.838
0.454
0.646
0.084
3.616
-0.516
0.449
0.937
1.631
0.42
0.419
-0.18
-0.264
-0.255
1.286
-0.076
0.993
-0.309
-0.01
1.436
0.957
0.501
0.488
0.519
0.274
-0.895
-0.08
1.009
0.081
0.143
-0.887
-0.282
0.302
1.139
2.11
1.213
0.115
1.249
0.4
-0.182
-2.258
1.59
-0.55
-1.208
0.085
-1.939
-0.24
0.306
0.667
-0.32
-0.011
-0.277
0.472
0.444
-0.446
-1.416
0.418
-0.098
-0.674
0.815
-0.396
-0.035
-0.062
1.994
2.074
0.627
-0.749
0.506
1.191
2.61
0.037
-0.128
1.189
-0.474
-0.029
-0.568
-0.421
0
0.392
1.733
0.192
-0.321
0.47
-0.064
0.331
-0.93
0.808
-2.951
-0.034
0.765
-1.603
-1.545
-0.005
0.773
0.509
0.558
1.033
0.69
0.705
0.477
-0.967
0.028
0.17
-0.335
1.911
0.199
0.074
-1.022
0.789
0.334
1.905
0.499
-0.33
1.075
0.75
0.148
0.052
0.111
-0.012
0.472
0.026
0.432
0.175
1.035
0.429
0.504
2.907
-0.027
1.299
0.062
0.823
2.241
0.723
-0.541
0.285
1.318
0.289
0.325
-0.088
0.268
1.257
0.794
-0.399
0.409
-0.235
0.364
0.306
-0.072
-0.59
-0.385
1.263
-0.102
1.706
2.132
1.344
2.85
0.961
0.99
0.299
-0.055
2.289
-1.21
0.005
1.065
0.138
-1.864
0.148
-0.757
-2.273
0.283
0.268
0.905
0.059
-0.168
0.405
-1.63
0.04
-1.962
0.154
0.798
1.032
1.036
1.615
1.024
0.249
0.015
-1.243
-0.469
-0.508
-1.28
-0.11
1.154
0.094
-0.894
0.993
-0.946
-0.151
-0.37
-2.67
0.341
-0.202
0.537
0.35
0.802
0.195
0.784
0.617
0.572
0.275
0.33
-0.077
1.231
1.493
1.099
1.066
-0.413
2.274
0.388
2.385
-0.171
-0.511
0.183
0.007
-0.067
0.649
-0.55
-0.231
0.418
1.647
1.54
0.636
1.652
0.085
0.262
0.777
1.988
3.508
1.625
0.854
-0.027
-0.808
-0.377
-0.172
-0.086
1.101
-0.493
-0.222
-0.279
0.194
1.249
1.207
0.188
-0.3
0.762
1.56
-0.29
-0.338
0.122
0.929
0.929
-0.296
1.493
1.493
0.029
-0.673
0.337
-0.326
0.164
1.196
0.095
0.591
0.635
-0.091
-0.194
-0.691
-0.119
2.19
3.545
-0.98
-0.007
-1.475
-1.137
0.109
1.207
-0.864
-0.369
-2.044
0
0
1.396
-0.367
-1.36
-0.35
0.455
0.394
0.386
-0.001
-2.96
0.548
1.46
0.078
-0.388
0.512
0.143
-0.951
-0.06
0.055
0.067
2.38
0.774
1.406
-0.543
0.009
-0.784
-0.943
0.749
-0.842
0.008
0.817
-0.959
0.008
0.047
-0.346
0.817
0.817
0.817
0.885
0.048
0.811
0.75
0.811
-0.035
-0.016
-0.036
0.811
0.003
0.811
0.811
0.75
0.811
-0.982
-0.016
0.75
-0.037
-0.04
0.75
0.75
0.75
0.003
-1.096
0.75
0.811
0.75
-0.035
-0.001
0.75
0.75
-0.035
-0.517
0.002
0.75
-1.116
0.004
-0.001
0.75
0
0.004
0.003
0.75
-0.035
0.75
-0.035
0.75
0.75
0.811
0.811
0
0.75
-1.718
-1.722
-0.036
-0.006
-0.036
0.454
0.488
0.454
0.002
0.811
0
0.75
0.811
-0.439
0.002
0.75
-0.429
-1.03
-1.088
-2.472
0.003
-2.543
-2.421
0.811
0.811
0.75
-0.436
0.75
-1.113
0.75
0.75
-1.09
0.75
0.811
-0.041
-1.101
-0.036
0.02
0.004
0.811
0.877
0.877
0.044
-0.857
0.877
0.025
0.021
0.036
0.811
0.003
0.877
0.877
0.044
0.043
-0.888
-0.417
0.004
-0.416
0.045
0.003
-0.904
-0.971
0.811
0.044
0.811
-1.491
-2.494
0.811
0.009
0.041
-0.426
0.002
-0.855
0.808
-0.366
0.808
0.003
0.811
0.004
0.811
0.877
0.811
-0.868
0.811
0.021
-0.003
-1.474
0.811
0.003
0.02
0.811
-0.414
0.877
0.002
-0.34
-0.999
-0.404
-1.469
0.042
0.002
0.811
0.811
-0.418
0.004
0.016
0.043
0.811
0.033
-2.219
0.043
0.042
0.811
0.817
-1.004
-1.471
-0.346
0.885
0.049
-0.421
0.817
0.817
-2.238
-2.289
-0.333
-0.457
0.817
0.884
-0.333
0.046
0.007
0.885
0.817
-0.333
0.817
0.007
0.007
0.885
0.817
0.049
0.817
-0.948
0.037
0.817
0.044
-0.444
0.885
-0.377
0.005
0.885
-0.417
-0.336
-0.426
-0.899
-2.14
0.817
0.048
0.817
-0.411
0.048
0.007
0.046
-0.965
0.049
0.817
0.885
0.009
-0.408
0.048
-0.34
0.885
0.817
0.007
0.817
-0.334
0.007
0.04
0.049
0.817
0.817
0.025
0.784
-0.493
-0.366
0.817
0.885
0.885
-1.614
-0.409
-0.336
0.817
0.007
0.006
-0.836
0.005
0.885
0.817
0.885
-2.194
0.885
-0.339
0.817
-0.834
-1.465
-0.365
-0.34
0.817
0.048
0.048
0.885
0.003
-3.055
-7.023
-0.44
-0.348
0.043
0.005
-0.415
0.885
0.817
0.885
0.817
-0.955
0.817
-0.333
0.025
0.049
-0.345
0.007
0.006
0.817
0.008
0.817
-0.934
0.885
0.048
0.817
0.039
0.007
0.817
-0.957
0.885
0.817
-0.336
0.007
0.007
0.817
-2.413
0.007
-0.408
0.817
-0.397
