# Supplementary material
Source: HighWire-hosted journal article supplement (doi:10.1101/rna.080488.125)
Supplement: Supplemental_SChLAP1_appendix3_qualitativeproteomics.xlsx [file Supplemental_SChLAP1_appendix3_qualitativeproteomics.xlsx]

## Sheet: Table 1 Samples
Project							Samples
Client
Samples	Proteomics ID	uL of sample	total uL	starting SDS	casein spike volume	uL of 20% SDS, 50mM TEAB	uL of 200 mM DTT	uL of 400 mM IAA	uL 12% phosphoric acid for final 1.2%	S-trap binding buffer, 90% MeOH, 100mM TEAB pH 7.1	Volume	4x Wash, Binding buffer	20ng/uL trypsin in 50mM TEAB	Elute 50mM TEAB	Elute, 0.2% formic acid	Elute, 50% ACN, 0.2% formic acid	Final Recon uL of 1% TFA 2% ACN	total pmol/casein
E2-E5	114158	45	45	2	1	2.64706	2.56037	2.69513	5.39026	355.757	415.05	150	25	40	40	35	12	1
AU-helix	114159	45	45	2	1	2.64706	2.56037	2.69513	5.39026	355.757	415.05	150	25	40	40	35	12	1
3WJ	114160	45	45	2	1	2.64706	2.56037	2.69513	5.39026	355.757	415.05	150	25	40	40	35	12	1
CU-strand	114161	45	45	2	1	2.64706	2.56037	2.69513	5.39026	355.757	415.05	150	25	40	40	35	12	1
												Spin 4000g	1hr, 47C	Spin 4000g	Spin 4000g	Spin 4000g
	start micro s-trap protocol
	freeze lyophilize overnight
Additional Notes

## Sheet: Table 2 Peptides
PG.Genes	PG.Organisms	PG.ProteinDescriptions	PG.ProteinNames	PEP.PeptidePosition	PEP.IsProteinGroupSpecific	EG.ModifiedSequence	[1] ADHQC_SPD30_OA10034_10492_061824.htrms.PEP.Quantity	[2] ID114158_01_SPD30_OA10034_10492_061824.htrms.PEP.Quantity	[3] ID114159_01_SPD30_OA10034_10492_061824.htrms.PEP.Quantity	[4] ID114160_01_SPD30_OA10034_10492_061824.htrms.PEP.Quantity	[5] ID114161_01_SPD30_OA10034_10492_061824.htrms.PEP.Quantity
IGKV2-28;IGKV2-40;IGKV2D-40;IGKV2D-28	Homo sapiens	Immunoglobulin kappa variable 2-28;Immunoglobulin kappa variable 2-40;Immunoglobulin kappa variable 2D-40;Immunoglobulin kappa variable 2D-28	KV228_HUMAN;KV240_HUMAN;KVD40_HUMAN;KVD28_HUMAN	80;81;81;80	TRUE	_ASGVPDRFSGSGSGTDFTLK_		275.927	287.231	303.447
IGKV2-28;IGKV2-40;IGKV2D-40;IGKV2D-28	Homo sapiens	Immunoglobulin kappa variable 2-28;Immunoglobulin kappa variable 2-40;Immunoglobulin kappa variable 2D-40;Immunoglobulin kappa variable 2D-28	KV228_HUMAN;KV240_HUMAN;KVD40_HUMAN;KVD28_HUMAN	87;88;88;87	FALSE	_FSGSGSGTDFTLK_		230.4	125.26	101.007	90.2488
ZNF892	Homo sapiens	Zinc finger protein 892	ZN892_HUMAN	382	FALSE	_THTGERPYEC[Carbamidomethyl (C)]NEC[Carbamidomethyl (C)]GK_		0.622976	23.3339	33.5385	40.5772
ZNF892	Homo sapiens	Zinc finger protein 892	ZN892_HUMAN	397	TRUE	_AFGYC[Carbamidomethyl (C)]SALTQHQR_		21.7797	39.3578	0.5686	5.40231
IGKV3D-11;IGKV3-11	Homo sapiens	Immunoglobulin kappa variable 3D-11;Immunoglobulin kappa variable 3-11	KVD11_HUMAN;KV311_HUMAN	66;66	TRUE	_LLIYDASNR_		1400.94	459.255
IGHV3-74;IGHV3-66;IGHV3-23;IGHV3-53;IGHV3-30;IGHV3-33;IGHV3-30-3;IGHV3-30-5	Homo sapiens	Immunoglobulin heavy variable 3-74;Immunoglobulin heavy variable 3-66;Immunoglobulin heavy variable 3-23;Immunoglobulin heavy variable 3-53;Immunoglobulin heavy variable 3-30;Immunoglobulin heavy variable 3-33;Immunoglobulin heavy variable 3-30-3;Immunoglobulin heavy variable 3-30-5	HV374_HUMAN;HV366_HUMAN;HV323_HUMAN;HV353_HUMAN;HV330_HUMAN;HV333_HUMAN;HVC33_HUMAN;HVC05_HUMAN	96;95;96;95;96;96;96;96	TRUE	_NTLYLQM[Oxidation (M)]NSLR_		399.257
ZC3H11B	Homo sapiens	Zinc finger CCCH domain-containing protein 11B	ZC11B_HUMAN	26	FALSE	_HC[Carbamidomethyl (C)]EAALGNETVC[Carbamidomethyl (C)]TLWQEGR_			44.2999		103.528
MSANTD7	Homo sapiens	Myb/SANT-like DNA-binding domain-containing protein 7	MSD7_HUMAN	305	TRUE	_LIAIGEEASAQQDTANELRR_		337.512	321.205	551.451	158.283
MSANTD7	Homo sapiens	Myb/SANT-like DNA-binding domain-containing protein 7	MSD7_HUMAN	120	TRUE	_HC[Carbamidomethyl (C)]DQNLVASDAPGEEGTGILK_		26.538	72.2069	277.395
RBM47	Homo sapiens	RNA-binding protein 47	RBM47_HUMAN	153	TRUE	_LFIGGIPK_		26785.2	136339	98569.6	17137.4
RBM47	Homo sapiens	RNA-binding protein 47	RBM47_HUMAN	265	TRUE	_SFGQFNPGC[Carbamidomethyl (C)]VER_		23145.5	132582	98918.4	15387.1
RBM47	Homo sapiens	RNA-binding protein 47	RBM47_HUMAN	195	FALSE	_GFAFVEYESHR_		12302.2	88483.5	71509.6	11054.1
RBM47	Homo sapiens	RNA-binding protein 47	RBM47_HUMAN	102	TRUE	_LMMDFDGK_		12546.9	85293.6	60408.1	8705.61
RBM47	Homo sapiens	RNA-binding protein 47	RBM47_HUMAN	102	TRUE	_LM[Oxidation (M)]MDFDGK_		12546.9	85293.6	60408.1	8705.61
RBM47	Homo sapiens	RNA-binding protein 47	RBM47_HUMAN	102	TRUE	_LMM[Oxidation (M)]DFDGK_		12546.9	85293.6	60408.1	8705.61
RBM47	Homo sapiens	RNA-binding protein 47	RBM47_HUMAN	22	TRUE	_VPEGVAGAPNEAALLALMER_		11697.4	89361.7	51381.3	11391.5
RBM47	Homo sapiens	RNA-binding protein 47	RBM47_HUMAN	22	TRUE	_VPEGVAGAPNEAALLALM[Oxidation (M)]ER_		11697.4	89361.7	51381.3	11391.5
RBM47	Homo sapiens	RNA-binding protein 47	RBM47_HUMAN	81	TRUE	_DVYEDELVPVFEAVGR_		13576.7	98033.5	42743.8	7517.99
RBM47	Homo sapiens	RNA-binding protein 47	RBM47_HUMAN	252	TRUE	_NLMIETTEDTIKK_		11336.2	78228.4	52093.9	9280.6
RBM47	Homo sapiens	RNA-binding protein 47	RBM47_HUMAN	252	TRUE	_NLM[Oxidation (M)]IETTEDTIKK_		11336.2	78228.4	52093.9	9280.6
RBM47	Homo sapiens	RNA-binding protein 47	RBM47_HUMAN	531	TRUE	_IPTAGIYGASYVPFAAPATATIATLQK_		11076.4	78230	41103.8	8165.33
RBM47	Homo sapiens	RNA-binding protein 47	RBM47_HUMAN	130	TRUE	_ELNNYEIRPGR_		11344	66304.7	44103.6	6706.91
RBM47	Homo sapiens	RNA-binding protein 47	RBM47_HUMAN	517	TRUE	_PITPVYTVAPNVQR_		7974.12	57433.2	41150.8	5729.86
RBM47	Homo sapiens	RNA-binding protein 47	RBM47_HUMAN	42	TRUE	_TGYSMVQENGQR_		7191.14	50190.3	35274.9	5336.08
RBM47	Homo sapiens	RNA-binding protein 47	RBM47_HUMAN	42	TRUE	_TGYSM[Oxidation (M)]VQENGQR_		7191.14	50190.3	35274.9	5336.08
RBM47	Homo sapiens	RNA-binding protein 47	RBM47_HUMAN	282	TRUE	_DYAFVHFTSR_		6931.5	41917.3	33340.7	4994.44
RBM47	Homo sapiens	RNA-binding protein 47	RBM47_HUMAN	163	TRUE	_KREEILEEIAK_		6022.47	39351.2	29690.7	4713.46
RBM47	Homo sapiens	RNA-binding protein 47	RBM47_HUMAN	2	TRUE	_TAEDSTAAMSSDSAAGSSAK_		3872.11	25510	18765.3	3080.75
RBM47	Homo sapiens	RNA-binding protein 47	RBM47_HUMAN	2	TRUE	_[Acetyl (Protein N-term)]TAEDSTAAMSSDSAAGSSAK_		3872.11	25510	18765.3	3080.75
RBM47	Homo sapiens	RNA-binding protein 47	RBM47_HUMAN	2	TRUE	_TAEDSTAAM[Oxidation (M)]SSDSAAGSSAK_		3872.11	25510	18765.3	3080.75
RBM47	Homo sapiens	RNA-binding protein 47	RBM47_HUMAN	55	TRUE	_YGGPPPGWEGPHPQR_		2468.26	22167.5	17040.7	2610.59
RBM47	Homo sapiens	RNA-binding protein 47	RBM47_HUMAN	54	TRUE	_KYGGPPPGWEGPHPQR_		2242.48	20968.7	18475.9	2195.35
RBM47	Homo sapiens	RNA-binding protein 47	RBM47_HUMAN	70	FALSE	_GC[Carbamidomethyl (C)]EVFVGK_		2780.75	20052.6	13272.8	1865.37
RBM47	Homo sapiens	RNA-binding protein 47	RBM47_HUMAN	112	TRUE	_GYAFVMYC[Carbamidomethyl (C)]HK_		2236.02	18090.7	14632.7	1854.47
RBM47	Homo sapiens	RNA-binding protein 47	RBM47_HUMAN	112	TRUE	_GYAFVM[Oxidation (M)]YC[Carbamidomethyl (C)]HK_		2236.02	18090.7	14632.7	1854.47
RBM47	Homo sapiens	RNA-binding protein 47	RBM47_HUMAN	174	TRUE	_VTEGVLDVIVYASAADK_		2017.61	16063	11396.8	2950.34
RBM47	Homo sapiens	RNA-binding protein 47	RBM47_HUMAN	141	TRUE	_LLGVC[Carbamidomethyl (C)]C[Carbamidomethyl (C)]SVDNC[Carbamidomethyl (C)]R_		2096.94	18567.1	9800.36	1500.25
RBM47	Homo sapiens	RNA-binding protein 47	RBM47_HUMAN	252	TRUE	_NLMIETTEDTIK_		1835.13	16574.2	10832.5	1197.99
RBM47	Homo sapiens	RNA-binding protein 47	RBM47_HUMAN	252	TRUE	_NLM[Oxidation (M)]IETTEDTIK_		1835.13	16574.2	10832.5	1197.99
RBM47	Homo sapiens	RNA-binding protein 47	RBM47_HUMAN	280	TRUE	_IRDYAFVHFTSR_		960.301	11936.6	9769.81	1874.12
RBM47	Homo sapiens	RNA-binding protein 47	RBM47_HUMAN	70	FALSE	_GC[Carbamidomethyl (C)]EVFVGKIPR_		1014.24	15231.8	5296.11	309.094
RBM47	Homo sapiens	RNA-binding protein 47	RBM47_HUMAN	164	TRUE	_REEILEEIAK_		1341.84	10862	7316.23	1153.81
RBM47	Homo sapiens	RNA-binding protein 47	RBM47_HUMAN	78	TRUE	_IPRDVYEDELVPVFEAVGR_		911.32	12755.4	4969.89	486.938
RBM47	Homo sapiens	RNA-binding protein 47	RBM47_HUMAN	292	TRUE	_EDAVHAMNNLNGTELEGSC[Carbamidomethyl (C)]LEVTLAKPVDKEQYSR_	14.749	1617.71	9281.83	6248.53	1451.73
RBM47	Homo sapiens	RNA-binding protein 47	RBM47_HUMAN	292	TRUE	_EDAVHAM[Oxidation (M)]NNLNGTELEGSC[Carbamidomethyl (C)]LEVTLAKPVDKEQYSR_	14.749	1617.71	9281.83	6248.53	1451.73
RBM47	Homo sapiens	RNA-binding protein 47	RBM47_HUMAN	165	TRUE	_EEILEEIAK_		1244.79	6131.02	4777.71	1215.09
RBM47	Homo sapiens	RNA-binding protein 47	RBM47_HUMAN	193	FALSE	_NRGFAFVEYESHR_		165.914	6338.93	2734.7	23.2393
RBM47	Homo sapiens	RNA-binding protein 47	RBM47_HUMAN	2	TRUE	_TAEDSTAAMSSDSAAGSSAKVPEGVAGAPNEAALLALMER_		337.076	5278.22	2496.05	166.454
RBM47	Homo sapiens	RNA-binding protein 47	RBM47_HUMAN	2	TRUE	_TAEDSTAAM[Oxidation (M)]SSDSAAGSSAKVPEGVAGAPNEAALLALMER_		337.076	5278.22	2496.05	166.454
RBM47	Homo sapiens	RNA-binding protein 47	RBM47_HUMAN	174	TRUE	_VTEGVLDVIVYASAADKMK_		248.538	2289.88	1275.72	223.962
RBM47	Homo sapiens	RNA-binding protein 47	RBM47_HUMAN	174	TRUE	_VTEGVLDVIVYASAADKM[Oxidation (M)]K_		248.538	2289.88	1275.72	223.962
RBM47	Homo sapiens	RNA-binding protein 47	RBM47_HUMAN	395	TRUE	_GSYLGGYSAGR_		159.842	700.245	591.033	197.587
RBM47	Homo sapiens	RNA-binding protein 47	RBM47_HUMAN	219	TRUE	_IQLWGHQIAVDWAEPEIDVDEDVMETVK_		33.8722	428.709	296.3	45.3876
RBM47	Homo sapiens	RNA-binding protein 47	RBM47_HUMAN	292	TRUE	_EDAVHAMNNLNGTELEGSC[Carbamidomethyl (C)]LEVTLAKPVDK_		65.0398	191.463	176.073	40.6794
RBM47	Homo sapiens	RNA-binding protein 47	RBM47_HUMAN	102	TRUE	_LMMDFDGKNR_		3038.27	31534.2	16784.3	1167.39
RBM47	Homo sapiens	RNA-binding protein 47	RBM47_HUMAN	102	TRUE	_LM[Oxidation (M)]MDFDGKNR_		3038.27	31534.2	16784.3	1167.39
RBM47	Homo sapiens	RNA-binding protein 47	RBM47_HUMAN	102	TRUE	_LMM[Oxidation (M)]DFDGKNR_		3038.27	31534.2	16784.3	1167.39
RBM47	Homo sapiens	RNA-binding protein 47	RBM47_HUMAN	264	TRUE	_KSFGQFNPGC[Carbamidomethyl (C)]VER_		1859.18	12904.1	8375.54	1229.48
RBM47	Homo sapiens	RNA-binding protein 47	RBM47_HUMAN	42	TRUE	_TGYSMVQENGQRK_		205.388	3270.46	1797.23	16.2672
RBM47	Homo sapiens	RNA-binding protein 47	RBM47_HUMAN	42	TRUE	_TGYSM[Oxidation (M)]VQENGQRK_		205.388	3270.46	1797.23	16.2672
RBM47	Homo sapiens	RNA-binding protein 47	RBM47_HUMAN	279	TRUE	_KIRDYAFVHFTSR_			1071.83	365.273
RBM47	Homo sapiens	RNA-binding protein 47	RBM47_HUMAN	130	TRUE	_ELNNYEIR_			439.783	228.276
RBM47	Homo sapiens	RNA-binding protein 47	RBM47_HUMAN	112	TRUE	_GYAFVMYC[Carbamidomethyl (C)]HKHEAK_			802.822	533.984
RBM47	Homo sapiens	RNA-binding protein 47	RBM47_HUMAN	422	TRUE	_GYELVPNLEIPTVNPVAIK_			29.0506
RBM47	Homo sapiens	RNA-binding protein 47	RBM47_HUMAN	127	TRUE	_AVRELNNYEIRPGR_			66.196
ESYT2	Homo sapiens	Extended synaptotagmin-2	ESYT2_HUMAN	163	TRUE	_ALALLEDEER_		13249	8380.29	15053.9	9005.17
ESYT2	Homo sapiens	Extended synaptotagmin-2	ESYT2_HUMAN	891	TRUE	_VLVALASEELAK_		10004.6	7936.34	14874.3	9089.21
ESYT2	Homo sapiens	Extended synaptotagmin-2	ESYT2_HUMAN	720	TRUE	_AQPPEAGPQGLHDLGR_		7496.42	5396.18	11078.5	7933.05
ESYT2	Homo sapiens	Extended synaptotagmin-2	ESYT2_HUMAN	812	TRUE	_NLIAFSEDGSDPYVR_		8285.42	5982.64	9051.96	6965.27
ESYT2	Homo sapiens	Extended synaptotagmin-2	ESYT2_HUMAN	420	TRUE	_VGNQIFQSR_		5026.59	3402.45	5895.75	3968.51
ESYT2	Homo sapiens	Extended synaptotagmin-2	ESYT2_HUMAN	635	TRUE	_FQLSNSGPNSTIK_		4359.84	2970.74	5789.74	3964.87
ESYT2	Homo sapiens	Extended synaptotagmin-2	ESYT2_HUMAN	389	TRUE	_IHFIEAQDLQGKDTYLK_		3650.6	3016.13	4839.41	3399.53
ESYT2	Homo sapiens	Extended synaptotagmin-2	ESYT2_HUMAN	365	TRUE	_ITVPLVSEVQIAQLR_		4078.24	2824.09	3782.98	3159.06
ESYT2	Homo sapiens	Extended synaptotagmin-2	ESYT2_HUMAN	240	TRUE	_VDVGQQPLR_		3473.09	2640.4	4155.91	3097.97
ESYT2	Homo sapiens	Extended synaptotagmin-2	ESYT2_HUMAN	219	TRUE	_ETIEPAVR_		3366.22	2075.92	4916.03	2698.86
ESYT2	Homo sapiens	Extended synaptotagmin-2	ESYT2_HUMAN	412	TRUE	_SDPYGIIR_		2796.69	2430.96	3982.61	2288.92
ESYT2	Homo sapiens	Extended synaptotagmin-2	ESYT2_HUMAN	227	TRUE	_GANTHLSTFSFTK_		2466.7	1646.84	3743.6	2085.41
ESYT2	Homo sapiens	Extended synaptotagmin-2	ESYT2_HUMAN	389	TRUE	_IHFIEAQDLQGK_		1565.35	1131.45	2564.89	2262.49
ESYT2	Homo sapiens	Extended synaptotagmin-2	ESYT2_HUMAN	180	TRUE	_AC[Carbamidomethyl (C)]DLPAWVHFPDTER_		1676.63	1507.42	2167.16	1794.71
ESYT2	Homo sapiens	Extended synaptotagmin-2	ESYT2_HUMAN	503	TRUE	_LEWLTLMPNASNLDK_		1817.34	1522.46	1723.37	1565.62
ESYT2	Homo sapiens	Extended synaptotagmin-2	ESYT2_HUMAN	618	TRUE	_VPLSQLLTSEDMTVSQR_		1746.56	1138.28	1582.45	1881.48
ESYT2	Homo sapiens	Extended synaptotagmin-2	ESYT2_HUMAN	827	TRUE	_MYLLPDK_		1264.5	943.529	2054.32	1536.89
ESYT2	Homo sapiens	Extended synaptotagmin-2	ESYT2_HUMAN	484	TRUE	_LLDEWFTLDEVPKGK_		1119.75	1777.06	1780.42	966.781
ESYT2	Homo sapiens	Extended synaptotagmin-2	ESYT2_HUMAN	484	TRUE	_LLDEWFTLDEVPK_		1562.65	1098.11	1522.69	1448.07
ESYT2	Homo sapiens	Extended synaptotagmin-2	ESYT2_HUMAN	554	TRUE	_ISSNPNPVVQMSVGHK_		1317.81	1081.25	1429.17	1307.21
ESYT2	Homo sapiens	Extended synaptotagmin-2	ESYT2_HUMAN	554	TRUE	_ISSNPNPVVQM[Oxidation (M)]SVGHK_		1317.81	1081.25	1429.17	1307.21
ESYT2	Homo sapiens	Extended synaptotagmin-2	ESYT2_HUMAN	876	TRUE	_NSGGFLSK_		1082.98	845.483	1242.92	1177.55
ESYT2	Homo sapiens	Extended synaptotagmin-2	ESYT2_HUMAN	736	TRUE	_SSSSLLASPGHISVKEPTPSIASDISLPIATQELR_		937.269	992.451	1218.11	631.975
ESYT2	Homo sapiens	Extended synaptotagmin-2	ESYT2_HUMAN	524	TRUE	_ADKDQANDGLSSALLILYLDSAR_		492.04	521.955	1460	1073.16
ESYT2	Homo sapiens	Extended synaptotagmin-2	ESYT2_HUMAN	163	TRUE	_ALALLEDEERVVR_		781.271	1094.4	1052.03	502.342
ESYT2	Homo sapiens	Extended synaptotagmin-2	ESYT2_HUMAN	216	TRUE	_LFRETIEPAVR_		1557.49	1351.88	195.554	172.233
ESYT2	Homo sapiens	Extended synaptotagmin-2	ESYT2_HUMAN	847	TRUE	_TLNPVFDQSFDFSVSLPEVQR_		508.008	678.614	985.721	1006.87
ESYT2	Homo sapiens	Extended synaptotagmin-2	ESYT2_HUMAN	688	TRUE	_SHMSGSPGPGGSNTAPSTPVIGGSDKPGMEEK_		782.416	486.768	981.316	838.102
ESYT2	Homo sapiens	Extended synaptotagmin-2	ESYT2_HUMAN	688	TRUE	_SHMSGSPGPGGSNTAPSTPVIGGSDKPGM[Oxidation (M)]EEK_		782.416	486.768	981.316	838.102
ESYT2	Homo sapiens	Extended synaptotagmin-2	ESYT2_HUMAN	688	TRUE	_SHM[Oxidation (M)]SGSPGPGGSNTAPSTPVIGGSDKPGMEEK_		782.416	486.768	981.316	838.102
ESYT2	Homo sapiens	Extended synaptotagmin-2	ESYT2_HUMAN	553	TRUE	_KISSNPNPVVQMSVGHK_		643.382	446.038	1232.29	612.699
ESYT2	Homo sapiens	Extended synaptotagmin-2	ESYT2_HUMAN	553	TRUE	_KISSNPNPVVQM[Oxidation (M)]SVGHK_		643.382	446.038	1232.29	612.699
ESYT2	Homo sapiens	Extended synaptotagmin-2	ESYT2_HUMAN	736	TRUE	_SSSSLLASPGHISVK_		616.783	289.919	784.075	875.767
ESYT2	Homo sapiens	Extended synaptotagmin-2	ESYT2_HUMAN	579	TRUE	_TNEPVWEENFTFFIHNPK_		468.861	406.024	878.07	740.988
ESYT2	Homo sapiens	Extended synaptotagmin-2	ESYT2_HUMAN	429	TRUE	_VIKENLSPK_		534.975	332.806	921.445	516.911
ESYT2	Homo sapiens	Extended synaptotagmin-2	ESYT2_HUMAN	410	TRUE	_GKSDPYGIIR_		547.811	484.844	680.615	464.49
ESYT2	Homo sapiens	Extended synaptotagmin-2	ESYT2_HUMAN	180	TRUE	_AC[Carbamidomethyl (C)]DLPAWVHFPDTERAEWLNK_		442.003	300.161	784.373	566.371
ESYT2	Homo sapiens	Extended synaptotagmin-2	ESYT2_HUMAN	775	TRUE	_QLENGTTLGQSPLGQIQLTIR_		407.999	398.199	606.45	419.001
ESYT2	Homo sapiens	Extended synaptotagmin-2	ESYT2_HUMAN	847	TRUE	_TLNPVFDQSFDFSVSLPEVQRR_		349.115	282.413	356.617	147.332
ESYT2	Homo sapiens	Extended synaptotagmin-2	ESYT2_HUMAN	846	TRUE	_KTLNPVFDQSFDFSVSLPEVQR_		222.572	143.078	287.673	405.241
ESYT2	Homo sapiens	Extended synaptotagmin-2	ESYT2_HUMAN	597	TRUE	_RQDLEVEVRDEQHQC[Carbamidomethyl (C)]SLGNLK_		78.3508	90.4003	348.987	314.876
ESYT2	Homo sapiens	Extended synaptotagmin-2	ESYT2_HUMAN	518	TRUE	_VLTDIKADKDQANDGLSSALLILYLDSAR_		64.8514	158.181	291.278	251.279
ESYT2	Homo sapiens	Extended synaptotagmin-2	ESYT2_HUMAN	751	TRUE	_EPTPSIASDISLPIATQELR_		83.0197	72.5789	105.972	102.17
ESYT2	Homo sapiens	Extended synaptotagmin-2	ESYT2_HUMAN	254	TRUE	_VYTENVDKR_		129.063	4.85018	56.9735	35.9105
ESYT2	Homo sapiens	Extended synaptotagmin-2	ESYT2_HUMAN	293	TRUE	_SIQIHGTM[Oxidation (M)]R_		43.1631	21.9052
ESYT2	Homo sapiens	Extended synaptotagmin-2	ESYT2_HUMAN	302	TRUE	_VILEPLIGDMPLVGALSIFFLR_		4.38429		66.7641	11.7596
ESYT2	Homo sapiens	Extended synaptotagmin-2	ESYT2_HUMAN	773	TRUE	_LRQLENGTTLGQSPLGQIQLTIR_		10.3334	81.7314	85.0775
MED19	Homo sapiens	Mediator of RNA polymerase II transcription subunit 19	MED19_HUMAN	105	TRUE	_LSNFLPDLPGMIDLPGSHDNSSLR_		1540.17	1206.73	2573.14	1445.69
MED19	Homo sapiens	Mediator of RNA polymerase II transcription subunit 19	MED19_HUMAN	105	TRUE	_LSNFLPDLPGM[Oxidation (M)]IDLPGSHDNSSLR_		1540.17	1206.73	2573.14	1445.69
MED19	Homo sapiens	Mediator of RNA polymerase II transcription subunit 19	MED19_HUMAN	70	TRUE	_ELPGSTELTGSTNLITHYNLEQAYNK_		1358.43	1499.56	2200.05	1609.37
MED19	Homo sapiens	Mediator of RNA polymerase II transcription subunit 19	MED19_HUMAN	58	TRUE	_SGAGC[Carbamidomethyl (C)]GPFYLMR_		1457.69	878.45	2093.77	978.494
MED19	Homo sapiens	Mediator of RNA polymerase II transcription subunit 19	MED19_HUMAN	58	TRUE	_SGAGC[Carbamidomethyl (C)]GPFYLM[Oxidation (M)]R_		1457.69	878.45	2093.77	978.494
MED19	Homo sapiens	Mediator of RNA polymerase II transcription subunit 19	MED19_HUMAN	154	TRUE	_LHTGPLPEQC[Carbamidomethyl (C)]R_		1076.46	611.531	1061.8	403.091
MED19	Homo sapiens	Mediator of RNA polymerase II transcription subunit 19	MED19_HUMAN	129	TRUE	_SLIEKPPILSSSFNPITGTMLAGFR_		496.582	464.156	1048	555.05
MED19	Homo sapiens	Mediator of RNA polymerase II transcription subunit 19	MED19_HUMAN	129	TRUE	_SLIEKPPILSSSFNPITGTM[Oxidation (M)]LAGFR_		496.582	464.156	1048	555.05
MED19	Homo sapiens	Mediator of RNA polymerase II transcription subunit 19	MED19_HUMAN	184	TRUE	_TQDPVPPETPSDSDHK_		145.162	73.5131	120.835	53.6586
MED19	Homo sapiens	Mediator of RNA polymerase II transcription subunit 19	MED19_HUMAN	103	TRUE	_EKLSNFLPDLPGMIDLPGSHDNSSLR_		134.749	26.3492	40.2612	47.0708
MED19	Homo sapiens	Mediator of RNA polymerase II transcription subunit 19	MED19_HUMAN	103	TRUE	_EKLSNFLPDLPGM[Oxidation (M)]IDLPGSHDNSSLR_		134.749	26.3492	40.2612	47.0708
SHTN1	Homo sapiens	Shootin-1	SHOT1_HUMAN	58	TRUE	_ISHMVIEEVNFMQNHLEIEK_	1483.48	523.888	584.516	437.948	210.22
SHTN1	Homo sapiens	Shootin-1	SHOT1_HUMAN	248	TRUE	_QSHLLLQSSIPDQQLLK_		431.377		114.902
SHTN1	Homo sapiens	Shootin-1	SHOT1_HUMAN	420	TRUE	_GVHLRPVNQTARPK_		88.9623	7.5797
TMEM120B	Homo sapiens	Transmembrane protein 120B	T120B_HUMAN	31	TRUE	_QKLEELAALQTLC[Carbamidomethyl (C)]SSSISK_		162.583	198.676	164.51	118.548
TMEM120B	Homo sapiens	Transmembrane protein 120B	T120B_HUMAN	11	TRUE	_EWHELEGEFQELQETHR_			184.2	125.819	132.257
ARHGAP10	Homo sapiens	Rho GTPase-activating protein 10	RHG10_HUMAN	394	TRUE	_MGFTIIR_		1539.68	693.347	1606.33	611.406
ARHGAP10	Homo sapiens	Rho GTPase-activating protein 10	RHG10_HUMAN	410	TRUE	_GINDQGLYR_		1016.71	161.661	837.577	448.823
ARHGAP10	Homo sapiens	Rho GTPase-activating protein 10	RHG10_HUMAN	313	TRUE	_LGDGEVFFLK_		834.885	165.575	596.522	288.228
ARHGAP10	Homo sapiens	Rho GTPase-activating protein 10	RHG10_HUMAN	300	TRUE	_FNMIPFEHR_		576.907	250.757	692.453	283.012
ARHGAP10	Homo sapiens	Rho GTPase-activating protein 10	RHG10_HUMAN	371	TRUE	_EALSHSFNTAIIPRPEGNAQLDK_		329.625	174.577	515.946	336.349
ARHGAP10	Homo sapiens	Rho GTPase-activating protein 10	RHG10_HUMAN	52	TRUE	_SLSVAQR_		529.477	203.364	259.063	223.484
ARHGAP10	Homo sapiens	Rho GTPase-activating protein 10	RHG10_HUMAN	244	TRUE	_SEVEELMNK_		409.215	99.1266	337.121	301.933
ARHGAP10	Homo sapiens	Rho GTPase-activating protein 10	RHG10_HUMAN	66	TRUE	_DFKFEFIGDAVTDDER_		93.0971	192.338	239.168	565.264
ARHGAP10	Homo sapiens	Rho GTPase-activating protein 10	RHG10_HUMAN	465	TRUE	_SLPEPLMTYELHGDFIVPAK_		374.075	132.126	421.177	96.3368
ARHGAP10	Homo sapiens	Rho GTPase-activating protein 10	RHG10_HUMAN	506	TRUE	_NKEMLDILVK_		207.548	63.4548	357.417	305.314
ARHGAP10	Homo sapiens	Rho GTPase-activating protein 10	RHG10_HUMAN	299	TRUE	_KFNMIPFEHR_		168.818	105.691	354.329	266.148
ARHGAP10	Homo sapiens	Rho GTPase-activating protein 10	RHG10_HUMAN	429	TRUE	_LLSMLMDVK_		261.988	143.912	317.115	35.7176
ARHGAP10	Homo sapiens	Rho GTPase-activating protein 10	RHG10_HUMAN	429	TRUE	_LLSM[Oxidation (M)]LMDVK_		261.988	143.912	317.115	35.7176
ARHGAP10	Homo sapiens	Rho GTPase-activating protein 10	RHG10_HUMAN	89	TRUE	_EFSNFLK_		332.586	45.3465	112.783	159.111
ARHGAP10	Homo sapiens	Rho GTPase-activating protein 10	RHG10_HUMAN	185	TRUE	_LQEIQER_		156.759	109.048	234.195	87.7293
ARHGAP10	Homo sapiens	Rho GTPase-activating protein 10	RHG10_HUMAN	96	TRUE	_NLEEQREIMALSVTETLIKPLEK_		33.0665	73.6138	138.527	81.5911
ARHGAP10	Homo sapiens	Rho GTPase-activating protein 10	RHG10_HUMAN	558	TRUE	_FQNIVVEILIENHEK_		23.9288	22.8918	179.604	72.5733
ARHGAP10	Homo sapiens	Rho GTPase-activating protein 10	RHG10_HUMAN	776	TRUE	_GLIPQNYVK_		756.158		792.432	396.423
ARHGAP10	Homo sapiens	Rho GTPase-activating protein 10	RHG10_HUMAN	157	TRUE	_DSHLQEADIQVEQNR_		178.682	66.9525	180.997
ARHGAP10	Homo sapiens	Rho GTPase-activating protein 10	RHG10_HUMAN	102	TRUE	_EIMALSVTETLIKPLEK_			42.237	57.9067	17.5249
ARHGAP10	Homo sapiens	Rho GTPase-activating protein 10	RHG10_HUMAN	69	TRUE	_FEFIGDAVTDDER_				198.081
MEX3A	Homo sapiens	RNA-binding protein MEX3A	MEX3A_HUMAN	263	TRUE	_DRDPVFEITGAPGNVER_		387.699	2828.93	2685.14	394.647
MEX3A	Homo sapiens	RNA-binding protein MEX3A	MEX3A_HUMAN	428	TRUE	_SPATSAGPELAGLPR_		404.035	3339.37	1560.17	177.817
MEX3A	Homo sapiens	RNA-binding protein MEX3A	MEX3A_HUMAN	443	TRUE	_RPPGEPLQGFSK_		669.046	1970.31	1738.9	213.442
MEX3A	Homo sapiens	RNA-binding protein MEX3A	MEX3A_HUMAN	210	TRUE	_SGAAFGVAPALPGQVTIR_		212.404	2944.93	1167.43	88.7895
MEX3A	Homo sapiens	RNA-binding protein MEX3A	MEX3A_HUMAN	13	TRUE	_NGGFGELGC[Carbamidomethyl (C)]FGGSAK_		284.758	2135.65	838.727
MEX3A	Homo sapiens	RNA-binding protein MEX3A	MEX3A_HUMAN	295	TRUE	_ILEYNNENDFLAGSPDAAIDSR_		347.791	1991.52	794.658	106.662
MEX3A	Homo sapiens	RNA-binding protein MEX3A	MEX3A_HUMAN	249	TRUE	_IQQQTNTYIITPSR_		144.078	1708.44	987.154	100.839
MEX3A	Homo sapiens	RNA-binding protein MEX3A	MEX3A_HUMAN	501	TRUE	_TDPEC[Carbamidomethyl (C)]PVC[Carbamidomethyl (C)]HITATQAIR_		264.424	1494.49	654.174	96.1031
MEX3A	Homo sapiens	RNA-binding protein MEX3A	MEX3A_HUMAN	280	TRUE	_AREEIETHIAVR_		586.907	613.929	207.415	870.057
MEX3A	Homo sapiens	RNA-binding protein MEX3A	MEX3A_HUMAN	323	TRUE	_VHQPGC[Carbamidomethyl (C)]KPLSTFR_			989.463	650.65	31.2129
MEX3A	Homo sapiens	RNA-binding protein MEX3A	MEX3A_HUMAN	168	TRUE	_TPVRGEEPVFMVTGR_		847.768	7471.56	4433.81	482.746
MEX3A	Homo sapiens	RNA-binding protein MEX3A	MEX3A_HUMAN	168	TRUE	_TPVRGEEPVFM[Oxidation (M)]VTGR_		847.768	7471.56	4433.81	482.746
MEX3A	Homo sapiens	RNA-binding protein MEX3A	MEX3A_HUMAN	2	TRUE	_PSLVVSGIMER_		341.205	2486.59	1466.86
MEX3A	Homo sapiens	RNA-binding protein MEX3A	MEX3A_HUMAN	2	TRUE	_PSLVVSGIM[Oxidation (M)]ER_		341.205	2486.59	1466.86
MEX3A	Homo sapiens	RNA-binding protein MEX3A	MEX3A_HUMAN	249	TRUE	_IQQQTNTYIITPSRDRDPVFEITGAPGNVER_		680.558		1744.71
MEX3A	Homo sapiens	RNA-binding protein MEX3A	MEX3A_HUMAN	128	TRUE	_GSSNTTEC[Carbamidomethyl (C)]VPVPTSEHVAEIVGR_			1285.18	424.645	57.0844
MEX3A	Homo sapiens	RNA-binding protein MEX3A	MEX3A_HUMAN	336	TRUE	_QNSLGC[Carbamidomethyl (C)]IGEC[Carbamidomethyl (C)]GVDSGFEAPR_		379.999	566.714	256.019
MEX3A	Homo sapiens	RNA-binding protein MEX3A	MEX3A_HUMAN	30	TRUE	_GLLEDER_			630.904		140.092
MEX3A	Homo sapiens	RNA-binding protein MEX3A	MEX3A_HUMAN	248	TRUE	_RIQQQTNTYIITPSR_		42.9981	254.881	60.9843
MEX3A	Homo sapiens	RNA-binding protein MEX3A	MEX3A_HUMAN	13	TRUE	_NGGFGELGC[Carbamidomethyl (C)]FGGSAKDR_			49.0635	196.356
MEX3A	Homo sapiens	RNA-binding protein MEX3A	MEX3A_HUMAN	126	TRUE	_LKGSSNTTEC[Carbamidomethyl (C)]VPVPTSEHVAEIVGR_			993.137	377.385	19.2119
MEX3A	Homo sapiens	RNA-binding protein MEX3A	MEX3A_HUMAN	115	TRUE	_LC[Carbamidomethyl (C)]ALYKEAELR_			219.547	89.1846
MEX3A	Homo sapiens	RNA-binding protein MEX3A	MEX3A_HUMAN	208	TRUE	_NKSGAAFGVAPALPGQVTIR_			216.681
ILVBL	Homo sapiens	2-hydroxyacyl-CoA lyase 2	HACL2_HUMAN	557	TRUE	_EQVPSLGSNVAC[Carbamidomethyl (C)]GLAYTDYHK_		482.856	292.844	293.696	249.527
ILVBL	Homo sapiens	2-hydroxyacyl-CoA lyase 2	HACL2_HUMAN	405	TRUE	_LVEGLQGQTWAPDWVEELREADR_		109.802	152.2	230.895	142.187
ILVBL	Homo sapiens	2-hydroxyacyl-CoA lyase 2	HACL2_HUMAN	610	TRUE	_DGHPVVVNILIGR_		69.8879	74.1598	136.522	253.754
ILVBL	Homo sapiens	2-hydroxyacyl-CoA lyase 2	HACL2_HUMAN	111	TRUE	_LSGTVGVAAVTAGPGLTNTVTAVK_		75.8674	26.3832	96.1711	134.885
ILVBL	Homo sapiens	2-hydroxyacyl-CoA lyase 2	HACL2_HUMAN	158	TRUE	_GALQAVDQLSLFRPLC[Carbamidomethyl (C)]K_		8.29485	86.2229	120.416	105.999
ILVBL	Homo sapiens	2-hydroxyacyl-CoA lyase 2	HACL2_HUMAN	36	TRUE	_LGLFYQLLHK_		19.5903	13.017	61.9942	30.9134
ILVBL	Homo sapiens	2-hydroxyacyl-CoA lyase 2	HACL2_HUMAN	184	TRUE	_DIVPTLR_			338.08	527.9	414.108
ILVBL	Homo sapiens	2-hydroxyacyl-CoA lyase 2	HACL2_HUMAN	586	TRUE	_GLLLSRENEDQVVK_			187.458	64.552
ILVBL	Homo sapiens	2-hydroxyacyl-CoA lyase 2	HACL2_HUMAN	344	TRUE	_ADVIVLAGTVC[Carbamidomethyl (C)]DFR_					272.967
ILVBL	Homo sapiens	2-hydroxyacyl-CoA lyase 2	HACL2_HUMAN	328	TRUE	_NHPLHIR_		17.4108
PLEKHG3	Homo sapiens	Pleckstrin homology domain-containing family G member 3	PKHG3_HUMAN	1015	TRUE	_FFFNPSAVSQR_		2057.73	1722.76	3668.36	2206.22
PLEKHG3	Homo sapiens	Pleckstrin homology domain-containing family G member 3	PKHG3_HUMAN	107	TRUE	_MYVQDLR_		1219.68	1632.48	1852.87	2471.52
PLEKHG3	Homo sapiens	Pleckstrin homology domain-containing family G member 3	PKHG3_HUMAN	114	TRUE	_SIVEDYLLK_		1285.85	819.41	1911.95	1283.59
PLEKHG3	Homo sapiens	Pleckstrin homology domain-containing family G member 3	PKHG3_HUMAN	319	TRUE	_TFFLFDK_		1165.25	881.239	1796.39	1097.35
PLEKHG3	Homo sapiens	Pleckstrin homology domain-containing family G member 3	PKHG3_HUMAN	798	TRUE	_GDPPPISDAEFRPSSEIVK_		1170.75	381.401	1645.14	1711.46
PLEKHG3	Homo sapiens	Pleckstrin homology domain-containing family G member 3	PKHG3_HUMAN	890	TRUE	_ELSSSTQGELVAPLHPR_		803.079	634.146	1660.66	748.292
PLEKHG3	Homo sapiens	Pleckstrin homology domain-containing family G member 3	PKHG3_HUMAN	73	TRUE	_GPLSPFNSR_		691.105	638.704	1380.55	661.53
PLEKHG3	Homo sapiens	Pleckstrin homology domain-containing family G member 3	PKHG3_HUMAN	234	TRUE	_YHLLLQEIAK_		811.382	619.34	1243.05	603.11
PLEKHG3	Homo sapiens	Pleckstrin homology domain-containing family G member 3	PKHG3_HUMAN	609	TRUE	_FVSSFSR_		667.629	522.557	1251.74	690.393
PLEKHG3	Homo sapiens	Pleckstrin homology domain-containing family G member 3	PKHG3_HUMAN	757	TRUE	_FNSLPRPDPEPVPPVGSK_		613.948	586.437	1264.89	575.566
PLEKHG3	Homo sapiens	Pleckstrin homology domain-containing family G member 3	PKHG3_HUMAN	722	TRUE	_SYYENAEHHDAGFSVR_		566.039	486.289	888.903	767.525
PLEKHG3	Homo sapiens	Pleckstrin homology domain-containing family G member 3	PKHG3_HUMAN	1079	TRUE	_SHSVPENMVEPPLSGR_		424.825	439.317	784.885	665.914
PLEKHG3	Homo sapiens	Pleckstrin homology domain-containing family G member 3	PKHG3_HUMAN	1037	TRUE	_SPLSPTETFSWPDVR_		322.652	405.309	857.859	647.665
PLEKHG3	Homo sapiens	Pleckstrin homology domain-containing family G member 3	PKHG3_HUMAN	907	TRUE	_IVQLSHVMDSHVSER_		354.745	251.61	1056.24	397.063
PLEKHG3	Homo sapiens	Pleckstrin homology domain-containing family G member 3	PKHG3_HUMAN	341	TRUE	_GNIPC[Carbamidomethyl (C)]SSLMLIESTR_		219.805	223.926	1003.79	230
PLEKHG3	Homo sapiens	Pleckstrin homology domain-containing family G member 3	PKHG3_HUMAN	962	TRUE	_SPTVPC[Carbamidomethyl (C)]LQEEAGEPLGGK_		309.575	175.417	490.917	426.293
PLEKHG3	Homo sapiens	Pleckstrin homology domain-containing family G member 3	PKHG3_HUMAN	282	TRUE	_LQEIQSLLINWK_		218.958	208.63	433.702	248.256
PLEKHG3	Homo sapiens	Pleckstrin homology domain-containing family G member 3	PKHG3_HUMAN	356	TRUE	_DSLC[Carbamidomethyl (C)]FTVTHYK_		160.926	191.063	322.376	351.633
PLEKHG3	Homo sapiens	Pleckstrin homology domain-containing family G member 3	PKHG3_HUMAN	939	TRUE	_SNKPVMARPPLQWEK_		97.8596	96.3418	461.909	300.274
PLEKHG3	Homo sapiens	Pleckstrin homology domain-containing family G member 3	PKHG3_HUMAN	370	TRUE	_QQYSIQAK_		240.239	121.578	268.933	276.759
PLEKHG3	Homo sapiens	Pleckstrin homology domain-containing family G member 3	PKHG3_HUMAN	430	TRUE	_AWSSQDEVSTNVR_		134.4	114.212	308.283	172.102
PLEKHG3	Homo sapiens	Pleckstrin homology domain-containing family G member 3	PKHG3_HUMAN	407	TRUE	_EAILEM[Oxidation (M)]DSYYPNR_		94.3543	73.674	219.27	128.343
PLEKHG3	Homo sapiens	Pleckstrin homology domain-containing family G member 3	PKHG3_HUMAN	392	TRUE	_LILENHHATIPQK_		74.6874	71.8926	259.048	87.7599
PLEKHG3	Homo sapiens	Pleckstrin homology domain-containing family G member 3	PKHG3_HUMAN	2	TRUE	_PVSTSLHQDGSQERPVSLTSTTSSSGSSC[Carbamidomethyl (C)]DSR_		66.4575	107.231	185.368	109.486
PLEKHG3	Homo sapiens	Pleckstrin homology domain-containing family G member 3	PKHG3_HUMAN	817	TRUE	_IWEGMESSGGSPGK_		48.2819	56.6199	84.3424	192.892
PLEKHG3	Homo sapiens	Pleckstrin homology domain-containing family G member 3	PKHG3_HUMAN	429	TRUE	_KAWSSQDEVSTNVR_		6.56125	37.0215	127.057	37.4325
PLEKHG3	Homo sapiens	Pleckstrin homology domain-containing family G member 3	PKHG3_HUMAN	100	FALSE	_EIVETER_		224.692		421.449	259.951
PLEKHG3	Homo sapiens	Pleckstrin homology domain-containing family G member 3	PKHG3_HUMAN	209	TRUE	_DRQELLQHSLPLGSYLLKPVQR_			81.3228	212.467	222.029
PLEKHG3	Homo sapiens	Pleckstrin homology domain-containing family G member 3	PKHG3_HUMAN	34	TRUE	_SAMEEPSSSEAPAK_		106.985		209.799	131.609
PLEKHG3	Homo sapiens	Pleckstrin homology domain-containing family G member 3	PKHG3_HUMAN	638	TRUE	_SSSVLSLEGSEK_		114.669		112.802	47.0267
PLEKHG3	Homo sapiens	Pleckstrin homology domain-containing family G member 3	PKHG3_HUMAN	740	TRUE	_ESLSYIPK_				284.263	437.068
ELOVL7	Homo sapiens	Elongation of very long chain fatty acids protein 7	ELOV7_HUMAN	2	TRUE	_[Acetyl (Protein N-term)]AFSDLTSR_		4367.94	4329.35	6633.49	4284.61
ELOVL7	Homo sapiens	Elongation of very long chain fatty acids protein 7	ELOV7_HUMAN	10	TRUE	_TVHLYDNWIK_		2884.69	2568.49	3969.12	2755.72
ELOVL7	Homo sapiens	Elongation of very long chain fatty acids protein 7	ELOV7_HUMAN	99	TRUE	_C[Carbamidomethyl (C)]DIVDYSR_		1262.41	991.709	1212.43	609.851
ELOVL7	Homo sapiens	Elongation of very long chain fatty acids protein 7	ELOV7_HUMAN	10	TRUE	_TVHLYDNWIKDADPR_		140.52	120.465	307.316	102.81
BCLAF3	Homo sapiens	BCLAF1 and THRAP3 family member 3	BCLA3_HUMAN	484	TRUE	_ANYFPSPGITLHER_		351.772	204.03	510.4	911.39
BCLAF3	Homo sapiens	BCLAF1 and THRAP3 family member 3	BCLA3_HUMAN	524	TRUE	_IDMSLAELQSK_		222.382	68.7346	111.951	321.656
BCLAF3	Homo sapiens	BCLAF1 and THRAP3 family member 3	BCLA3_HUMAN	535	TRUE	_QAVIYESEQTLIK_		73.2005	88.5758	49.7672	233.652
BCLAF3	Homo sapiens	BCLAF1 and THRAP3 family member 3	BCLA3_HUMAN	288	TRUE	_LLDGDQDFSDGR_			48.4313	131.336	320.577
BCLAF3	Homo sapiens	BCLAF1 and THRAP3 family member 3	BCLA3_HUMAN	116	TRUE	_YSEGIPYKEHER_		52.8072		36.8145	63.7182
BCLAF3	Homo sapiens	BCLAF1 and THRAP3 family member 3	BCLA3_HUMAN	158	TRUE	_SIADSFR_		14.6474	11.8512		25.8581
ZNF320	Homo sapiens	Zinc finger protein 320	ZN320_HUMAN	490	TRUE	_IPFGDNC[Carbamidomethyl (C)]FK_		1706.75	880.736	2028.13	2008.63
ZNF320	Homo sapiens	Zinc finger protein 320	ZN320_HUMAN	2	FALSE	_[Acetyl (Protein N-term)]ALSQGLLTFR_		1150.1	852.171	1208.88	1754.65
ZNF320	Homo sapiens	Zinc finger protein 320	ZN320_HUMAN	449	TRUE	_AFNSPSHLIR_		368.447	295.832	893.637	900.028
ZNF320	Homo sapiens	Zinc finger protein 320	ZN320_HUMAN	412	TRUE	_LYEC[Carbamidomethyl (C)]EEC[Carbamidomethyl (C)]DKVYIR_		246.411	176.87	424.167	379
ZNF320	Homo sapiens	Zinc finger protein 320	ZN320_HUMAN	53	TRUE	_C[Carbamidomethyl (C)]MMNTLSSTGQGNTEVIHTGTLQR_		217.782	139.943	309.231	359.349
ZNF320	Homo sapiens	Zinc finger protein 320	ZN320_HUMAN	285	TRUE	_NSVLVIHK_		217.855	185.302	366.189	145.514
ZNF320	Homo sapiens	Zinc finger protein 320	ZN320_HUMAN	482	TRUE	_SLLAEHQK_		241.843		212.233	85.7839
ZNF320	Homo sapiens	Zinc finger protein 320	ZN320_HUMAN	253	TRUE	_TFSQTSHLVYHHR_			124.07	71.9207	141.966
ZNF320	Homo sapiens	Zinc finger protein 320	ZN320_HUMAN	499	TRUE	_C[Carbamidomethyl (C)]NEYSKPSSIN_		70.5947		63.5905	48.7712
NBAS	Homo sapiens	NBAS subunit of NRZ tethering complex	NBAS_HUMAN	1262	TRUE	_LLGLAELLR_		123.679	247.591	272.861	297.963
NBAS	Homo sapiens	NBAS subunit of NRZ tethering complex	NBAS_HUMAN	945	TRUE	_QSPGVANELLK_		188.668	75.0987	143.415	220.236
NBAS	Homo sapiens	NBAS subunit of NRZ tethering complex	NBAS_HUMAN	1854	TRUE	_LFWTGDPHLIK_		115.188	116.172	192.314	189.417
NBAS	Homo sapiens	NBAS subunit of NRZ tethering complex	NBAS_HUMAN	609	TRUE	_GTDLEALLAIGK_		121.814	91.998	119.979	189.466
NBAS	Homo sapiens	NBAS subunit of NRZ tethering complex	NBAS_HUMAN	2336	TRUE	_EAGHEAEAGSLLLAVR_		107.303	102.459	194.869	97.1608
NBAS	Homo sapiens	NBAS subunit of NRZ tethering complex	NBAS_HUMAN	1723	TRUE	_AQDLHLFETLK_		95.3853	69.1131	204.474	71.087
NBAS	Homo sapiens	NBAS subunit of NRZ tethering complex	NBAS_HUMAN	1390	TRUE	_AVQEDEVGVPGSNSADLLR_		86.6583	138.856	149.961	38.0601
NBAS	Homo sapiens	NBAS subunit of NRZ tethering complex	NBAS_HUMAN	695	TRUE	_LATYEEILGVPHASEQR_		56.5524	104.121	97.6088	141.484
NBAS	Homo sapiens	NBAS subunit of NRZ tethering complex	NBAS_HUMAN	113	TRUE	_SAKDDFTSIIGK_		81.5495	55.0955	123.195	59.2454
NBAS	Homo sapiens	NBAS subunit of NRZ tethering complex	NBAS_HUMAN	1280	TRUE	_RGQVLILLVEQALR_		25.6159	39.2832	55.3784	36.291
NBAS	Homo sapiens	NBAS subunit of NRZ tethering complex	NBAS_HUMAN	533	TRUE	_KIESEEYEEALSLAHTYGLDTDLVYQR_			361.473	96.9045
NBAS	Homo sapiens	NBAS subunit of NRZ tethering complex	NBAS_HUMAN	1427	TRUE	_AVLQAVSDGQWWK_		55.8176		102.181
NBAS	Homo sapiens	NBAS subunit of NRZ tethering complex	NBAS_HUMAN	1746	TRUE	_YIYPTIGGFDHER_				109.046
NBAS	Homo sapiens	NBAS subunit of NRZ tethering complex	NBAS_HUMAN	564	TRUE	_SAVNVASIQNYLSK_		38.8288	26.9531
NBAS	Homo sapiens	NBAS subunit of NRZ tethering complex	NBAS_HUMAN	2359	TRUE	_TFSTALR_			135.953	248.945
TARS3	Homo sapiens	Threonine--tRNA ligase 2, cytoplasmic	SYTC2_HUMAN	24	TRUE	_WLWSEVER_		503.912	200.894	612.488	411.846
TARS3	Homo sapiens	Threonine--tRNA ligase 2, cytoplasmic	SYTC2_HUMAN	650	TRUE	_FNLTYVSK_		157.151	95.0722	270.159	50.105
TARS3	Homo sapiens	Threonine--tRNA ligase 2, cytoplasmic	SYTC2_HUMAN	323	TRUE	_VNTATTTVYR_		153.513	67.8374	174.366
TARS3	Homo sapiens	Threonine--tRNA ligase 2, cytoplasmic	SYTC2_HUMAN	303	TRUE	_EILLEMFK_		96.3451	47.2293	163.642	71.0387
TARS3	Homo sapiens	Threonine--tRNA ligase 2, cytoplasmic	SYTC2_HUMAN	522	TRUE	_NELSGTLSGLTR_		290.113	213.329	114.108
TARS3	Homo sapiens	Threonine--tRNA ligase 2, cytoplasmic	SYTC2_HUMAN	699	TRUE	_QVMVIPVGPTC[Carbamidomethyl (C)]EK_		92.5139	105.99		66.914
TARS3	Homo sapiens	Threonine--tRNA ligase 2, cytoplasmic	SYTC2_HUMAN	166	TRUE	_VADGQTVQGEVWK_		56.686	29.8	132.028
TYW5	Homo sapiens	tRNA wybutosine-synthesizing protein 5	TYW5_HUMAN	79	TRUE	_TLPFDQLVQR_		53.4356
VWA8	Homo sapiens	von Willebrand factor A domain-containing protein 8	VWA8_HUMAN	498	TRUE	_SSPLVNAALEGK_		1452.2	1188.66	1641.8	1136.59
VWA8	Homo sapiens	von Willebrand factor A domain-containing protein 8	VWA8_HUMAN	689	TRUE	_FLPSLAR_		1626.62	1012.75	1531.34	763.484
VWA8	Homo sapiens	von Willebrand factor A domain-containing protein 8	VWA8_HUMAN	877	TRUE	_IVANSANVNGR_		1486.05	1425.36	33.6722	1103.82
VWA8	Homo sapiens	von Willebrand factor A domain-containing protein 8	VWA8_HUMAN	238	TRUE	_VIALGLPVPR_		556.111	1050.03	1383.84	805.286
VWA8	Homo sapiens	von Willebrand factor A domain-containing protein 8	VWA8_HUMAN	862	TRUE	_TLVENGEMILADGRR_		1001.27	328.344	1456.9	798.495
VWA8	Homo sapiens	von Willebrand factor A domain-containing protein 8	VWA8_HUMAN	1260	TRUE	_THTISLPINLK_		1024.66	572.411	803.541	704.268
VWA8	Homo sapiens	von Willebrand factor A domain-containing protein 8	VWA8_HUMAN	888	TRUE	_ENVVVIHPDFR_		571.689	515.889	1021.08	546.363
VWA8	Homo sapiens	von Willebrand factor A domain-containing protein 8	VWA8_HUMAN	1656	TRUE	_IILDNLQAK_		721.6	710.749	682.604	491.636
VWA8	Homo sapiens	von Willebrand factor A domain-containing protein 8	VWA8_HUMAN	942	TRUE	_QYGPNVPEPILQK_		755.696	396.829	845.16	494.487
VWA8	Homo sapiens	von Willebrand factor A domain-containing protein 8	VWA8_HUMAN	568	TRUE	_SIFPIHPSFR_		623.341	503.03	825.075	487.28
VWA8	Homo sapiens	von Willebrand factor A domain-containing protein 8	VWA8_HUMAN	130	TRUE	_EVEYIALSR_		620.77	206.236	746.022	384.912
VWA8	Homo sapiens	von Willebrand factor A domain-containing protein 8	VWA8_HUMAN	519	TRUE	_VNAGTLAVLQR_		548.081	423.597	641.418	273.216
VWA8	Homo sapiens	von Willebrand factor A domain-containing protein 8	VWA8_HUMAN	172	TRUE	_TLILEGLEK_		569.512	370.845	433.985	482.135
VWA8	Homo sapiens	von Willebrand factor A domain-containing protein 8	VWA8_HUMAN	733	TRUE	_IGAVSAPIYNAHEK_		354.415	456.412	655.983	378.837
VWA8	Homo sapiens	von Willebrand factor A domain-containing protein 8	VWA8_HUMAN	487	TRUE	_YTLPNGDTAWR_		595.91	339.469	658.529	245.186
VWA8	Homo sapiens	von Willebrand factor A domain-containing protein 8	VWA8_HUMAN	810	TRUE	_DTTVQTLTLQPSVK_		491.241	348.298	552.174	384.192
VWA8	Homo sapiens	von Willebrand factor A domain-containing protein 8	VWA8_HUMAN	1023	TRUE	_YGIPIGAKPTSVQLAK_		555.542	306.277	455.584	413.51
VWA8	Homo sapiens	von Willebrand factor A domain-containing protein 8	VWA8_HUMAN	184	TRUE	_NVLPVLNNLLENR_		301.494	437.926	423.824	468.311
VWA8	Homo sapiens	von Willebrand factor A domain-containing protein 8	VWA8_HUMAN	1076	TRUE	_GPALINIQEYPIER_		479.363	295.968	463.556	331.565
VWA8	Homo sapiens	von Willebrand factor A domain-containing protein 8	VWA8_HUMAN	1844	TRUE	_FAQILTR_		297.018	233.889	395.737	343.819
VWA8	Homo sapiens	von Willebrand factor A domain-containing protein 8	VWA8_HUMAN	1247	TRUE	_GNSLTVLDVLEGR_		346.146	124.16	442.525	330.807
VWA8	Homo sapiens	von Willebrand factor A domain-containing protein 8	VWA8_HUMAN	265	TRUE	_DIYYLPFKDQLK_		341.578	254.476	388.586	256.133
VWA8	Homo sapiens	von Willebrand factor A domain-containing protein 8	VWA8_HUMAN	1335	TRUE	_ISSDQLSSEHLSSAVEQK_		307.161	155.849	481.445	240.902
VWA8	Homo sapiens	von Willebrand factor A domain-containing protein 8	VWA8_HUMAN	990	TRUE	_FPTEGLSSVVR_		239.417	213.474	377.119	176.13
VWA8	Homo sapiens	von Willebrand factor A domain-containing protein 8	VWA8_HUMAN	535	TRUE	_ELSLYDGSR_		267.679	155.213	343.237	219.713
VWA8	Homo sapiens	von Willebrand factor A domain-containing protein 8	VWA8_HUMAN	669	TRUE	_LSQYPNENLHSAVTK_		332.137	162.052	224.231	251.629
VWA8	Homo sapiens	von Willebrand factor A domain-containing protein 8	VWA8_HUMAN	205	TRUE	_FLMSAER_		356.842	158.045	216.736	192.996
VWA8	Homo sapiens	von Willebrand factor A domain-containing protein 8	VWA8_HUMAN	72	TRUE	_NPELVPQNYISDSLAQSVVQHLR_		165.105	205.68	429.2	118.369
VWA8	Homo sapiens	von Willebrand factor A domain-containing protein 8	VWA8_HUMAN	172	TRUE	_TLILEGLEKAER_		191.503	300.891	325.615
VWA8	Homo sapiens	von Willebrand factor A domain-containing protein 8	VWA8_HUMAN	840	TRUE	_LGHILVVDEADKAPTNVTC[Carbamidomethyl (C)]ILK_		82.8018	216.546	350.403	217.714
VWA8	Homo sapiens	von Willebrand factor A domain-containing protein 8	VWA8_HUMAN	614	TRUE	_SEEIQVIK_		179.879	101.441	336.579	129.609
VWA8	Homo sapiens	von Willebrand factor A domain-containing protein 8	VWA8_HUMAN	642	TRUE	_LRETQDPTAQSLAASLSTR_		122.926		232.76	242.166
VWA8	Homo sapiens	von Willebrand factor A domain-containing protein 8	VWA8_HUMAN	964	TRUE	_SLADQGIINYPYSTR_		258.898	39.9574	151.793	116.198
VWA8	Homo sapiens	von Willebrand factor A domain-containing protein 8	VWA8_HUMAN	624	TRUE	_VPNVPQEALDK_		178.571	76.0449	126.424	156.083
VWA8	Homo sapiens	von Willebrand factor A domain-containing protein 8	VWA8_HUMAN	1238	TRUE	_NWLVFYK_		125.631	9.32627	216.039	58.815
VWA8	Homo sapiens	von Willebrand factor A domain-containing protein 8	VWA8_HUMAN	1698	TRUE	_RGELEPQLGSPQQKPK_		172.088	77.084	72.533	87.4981
VWA8	Homo sapiens	von Willebrand factor A domain-containing protein 8	VWA8_HUMAN	1413	TRUE	_QSNC[Carbamidomethyl (C)]VTLLDTNQVVR_		106.888	87.425	141.528	70.0565
VWA8	Homo sapiens	von Willebrand factor A domain-containing protein 8	VWA8_HUMAN	1205	TRUE	_LILPSEK_		108.129	92.3173	119.858	51.1398
VWA8	Homo sapiens	von Willebrand factor A domain-containing protein 8	VWA8_HUMAN	862	TRUE	_TLVENGEMILADGR_		75.1391	118.596	46.7452	101.14
VWA8	Homo sapiens	von Willebrand factor A domain-containing protein 8	VWA8_HUMAN	100	TRUE	_DLLGQDVFLIGPPGPLRR_		37.3953	26.7056	137.526	123.6
VWA8	Homo sapiens	von Willebrand factor A domain-containing protein 8	VWA8_HUMAN	1428	TRUE	_ILPPGEVPLKDIYPK_		91.0762	73.4581	43.4058	51.6822
VWA8	Homo sapiens	von Willebrand factor A domain-containing protein 8	VWA8_HUMAN	118	TRUE	_SIAMQYLELTKR_		5.43775	26.8783	53.5405	53.7722
VWA8	Homo sapiens	von Willebrand factor A domain-containing protein 8	VWA8_HUMAN	411	TRUE	_LLSQPC[Carbamidomethyl (C)]ASDR_		30.8734	12.8223	20.6475	2.9688
VWA8	Homo sapiens	von Willebrand factor A domain-containing protein 8	VWA8_HUMAN	1627	TRUE	_LKEIQMSEYDAATYER_		244.745	252.575	155.361
VWA8	Homo sapiens	von Willebrand factor A domain-containing protein 8	VWA8_HUMAN	1001	TRUE	_NVFDFDSYNNDMR_			199.01	71.0596	137.569
VWA8	Homo sapiens	von Willebrand factor A domain-containing protein 8	VWA8_HUMAN	1395	TRUE	_SGTDTSFYR_		33.6027		113.706	63.1548
VWA8	Homo sapiens	von Willebrand factor A domain-containing protein 8	VWA8_HUMAN	118	TRUE	_SIAMQYLELTK_			24.212	48.7571	101.811
VWA8	Homo sapiens	von Willebrand factor A domain-containing protein 8	VWA8_HUMAN	986	TRUE	_HLQKFPTEGLSSVVR_			68.1853
SBNO1	Homo sapiens	Protein strawberry notch homolog 1	SBNO1_HUMAN	659	TRUE	_GVLQSLIEK_		886.709	537.286	1674.71	613.309
SBNO1	Homo sapiens	Protein strawberry notch homolog 1	SBNO1_HUMAN	1091	TRUE	_SGILTLDKDYNNIGK_		657.571	462.842	1291.18	344.909
SBNO1	Homo sapiens	Protein strawberry notch homolog 1	SBNO1_HUMAN	1230	TRUE	_LFLVYRPNTGK_		553.368	394.21	1213.33	353.22
SBNO1	Homo sapiens	Protein strawberry notch homolog 1	SBNO1_HUMAN	455	TRUE	_TGLAVLELQNK_		663.053	278.983	798.086	490.295
SBNO1	Homo sapiens	Protein strawberry notch homolog 1	SBNO1_HUMAN	1077	TRUE	_QGLIGVGLINVEDR_		377.097	361.754	456.187	328.711
SBNO1	Homo sapiens	Protein strawberry notch homolog 1	SBNO1_HUMAN	502	TRUE	_EFSDFIQAVER_		390.112	124.692	619.63	323.162
SBNO1	Homo sapiens	Protein strawberry notch homolog 1	SBNO1_HUMAN	911	TRUE	_SELDVPVEILNITEK_		362.994	232.682	423.346	334.524
SBNO1	Homo sapiens	Protein strawberry notch homolog 1	SBNO1_HUMAN	330	TRUE	_TIAGIIYENYLLSR_		223.417	269.762	469.745	331.832
SBNO1	Homo sapiens	Protein strawberry notch homolog 1	SBNO1_HUMAN	1044	TRUE	_NALEIVMK_		326.65	135.006	439.78	208.015
SBNO1	Homo sapiens	Protein strawberry notch homolog 1	SBNO1_HUMAN	545	TRUE	_IEEVLLSQSYVK_		237.291	106.896	451.012	147.447
SBNO1	Homo sapiens	Protein strawberry notch homolog 1	SBNO1_HUMAN	203	TRUE	_MWINDMK_		208.964	125.751	415.229	149.529
SBNO1	Homo sapiens	Protein strawberry notch homolog 1	SBNO1_HUMAN	572	TRUE	_FQQAADLIDAEQR_		211.882	119.109	398.414	86.8694
SBNO1	Homo sapiens	Protein strawberry notch homolog 1	SBNO1_HUMAN	443	TRUE	_NLC[Carbamidomethyl (C)]PVGSSKPTK_		176.157	57.046	234.077	106.348
SBNO1	Homo sapiens	Protein strawberry notch homolog 1	SBNO1_HUMAN	370	TRUE	_NILVHSLNK_		134.753	100.801	235.559	86.4117
SBNO1	Homo sapiens	Protein strawberry notch homolog 1	SBNO1_HUMAN	1142	TRUE	_YDMGILDLGSGDEK_		84.6624	30.4391	298.61	81.7209
SBNO1	Homo sapiens	Protein strawberry notch homolog 1	SBNO1_HUMAN	588	TRUE	_SMWGQFWSAHQR_		33.6384	35.7605	109.337	136.713
SBNO1	Homo sapiens	Protein strawberry notch homolog 1	SBNO1_HUMAN	394	TRUE	_KGVIFATYSSLIGESQSGGK_		81.4859	29.285	97.6486	14.0847
SBNO1	Homo sapiens	Protein strawberry notch homolog 1	SBNO1_HUMAN	984	TRUE	_SNQVTAPEYVFLISELAGEQR_		35.992	52.4745	78.7558	7.14982
SBNO1	Homo sapiens	Protein strawberry notch homolog 1	SBNO1_HUMAN	1318	TRUE	_VEGVLASVSGTNVK_		142.446	143.666	454.066
SBNO1	Homo sapiens	Protein strawberry notch homolog 1	SBNO1_HUMAN	535	TRUE	_QLSFTGVTFK_		89.191		186.432	100.296
SBNO1	Homo sapiens	Protein strawberry notch homolog 1	SBNO1_HUMAN	141	TRUE	_NAMTSAPSKDQVQLK_		80.1884		118.294	52.2348
SBNO1	Homo sapiens	Protein strawberry notch homolog 1	SBNO1_HUMAN	897	TRUE	_VVSNDDGSISYESR_		13.7096	4.15025	94.672
SBNO1	Homo sapiens	Protein strawberry notch homolog 1	SBNO1_HUMAN	639	TRUE	_TLEALEEGGGELNDFVSTAK_		51.2069		39.6043	9.28533
SBNO1	Homo sapiens	Protein strawberry notch homolog 1	SBNO1_HUMAN	160	TRUE	_NNSLNELMK_		114.576		228.081
SBNO1	Homo sapiens	Protein strawberry notch homolog 1	SBNO1_HUMAN	1142	TRUE	_YDMGILDLGSGDEKVR_		114.33		80.3582
SBNO1	Homo sapiens	Protein strawberry notch homolog 1	SBNO1_HUMAN	603	TRUE	_YLC[Carbamidomethyl (C)]IASK_		56.4879			31.2531
SBNO1	Homo sapiens	Protein strawberry notch homolog 1	SBNO1_HUMAN	1244	TRUE	_LEIYADLK_			54.2104
GTPBP10	Homo sapiens	GTP-binding protein 10	GTPBA_HUMAN	116	TRUE	_ILVAQGGLGGK_		4462.45	3283.7	6964.97	3563.44
GTPBP10	Homo sapiens	GTP-binding protein 10	GTPBA_HUMAN	127	TRUE	_LLTNFLPLKGQK_		4480.42	3527.53	5972.58	3397
GTPBP10	Homo sapiens	GTP-binding protein 10	GTPBA_HUMAN	42	TRUE	_GGDVWVVAQNR_		3358.06	1898.71	4115.84	2942.73
GTPBP10	Homo sapiens	GTP-binding protein 10	GTPBA_HUMAN	127	TRUE	_LLTNFLPLK_		2921.57	2523.83	4495.12	2153.84
GTPBP10	Homo sapiens	GTP-binding protein 10	GTPBA_HUMAN	67	TRUE	_FVAGVGANSK_		2937.22	2194.13	3963.87	1511.56
GTPBP10	Homo sapiens	GTP-binding protein 10	GTPBA_HUMAN	105	TRUE	_IIGELNKENDR_		2831.05	1602.85	3618.12	2199.85
GTPBP10	Homo sapiens	GTP-binding protein 10	GTPBA_HUMAN	249	TRUE	_TAFETIILLTK_		2539.66	1999.14	3875.55	1709.8
GTPBP10	Homo sapiens	GTP-binding protein 10	GTPBA_HUMAN	147	TRUE	_LIADVGLVGFPNAGK_		2717.79	1855.43	2465.96	2438.7
GTPBP10	Homo sapiens	GTP-binding protein 10	GTPBA_HUMAN	190	TRUE	_IMYSDFK_		2582.5	1774.35	3448.55	1277.53
GTPBP10	Homo sapiens	GTP-binding protein 10	GTPBA_HUMAN	190	TRUE	_IM[Oxidation (M)]YSDFK_		2582.5	1774.35	3448.55	1277.53
GTPBP10	Homo sapiens	GTP-binding protein 10	GTPBA_HUMAN	197	TRUE	_QISVADLPGLIEGAHMNK_		2169.9	1726.56	3035.54	1586.46
GTPBP10	Homo sapiens	GTP-binding protein 10	GTPBA_HUMAN	197	TRUE	_QISVADLPGLIEGAHM[Oxidation (M)]NK_		2169.9	1726.56	3035.54	1586.46
GTPBP10	Homo sapiens	GTP-binding protein 10	GTPBA_HUMAN	260	TRUE	_ELELYKEELQTKPALLAVNK_		2041.98	1398.88	2837.91	1389.6
GTPBP10	Homo sapiens	GTP-binding protein 10	GTPBA_HUMAN	315	TRUE	_TVEFQHIIPISAVTGEGIEELK_		2127.76	1204.18	2308.58	1575.41
GTPBP10	Homo sapiens	GTP-binding protein 10	GTPBA_HUMAN	35	TRUE	_LGGEGGKGGDVWVVAQNR_		1657.01	1288.74	2763.55	845.173
GTPBP10	Homo sapiens	GTP-binding protein 10	GTPBA_HUMAN	12	TRUE	_YGNFIDK_		1378.04	1123.8	1945.21	583.123
GTPBP10	Homo sapiens	GTP-binding protein 10	GTPBA_HUMAN	25	TRUE	_GGSGGMGYPR_		936.712	617.963	1280.79	384.436
GTPBP10	Homo sapiens	GTP-binding protein 10	GTPBA_HUMAN	280	TRUE	_MDLPDAQDKFHELMSQLQNPK_		512.171	368.682	963.306	762.683
GTPBP10	Homo sapiens	GTP-binding protein 10	GTPBA_HUMAN	280	TRUE	_M[Oxidation (M)]DLPDAQDKFHELMSQLQNPK_		512.171	368.682	963.306	762.683
GTPBP10	Homo sapiens	GTP-binding protein 10	GTPBA_HUMAN	342	TRUE	_SLDEQANQENDALHKK_		661.021	450.825	994.565	284.521
GTPBP10	Homo sapiens	GTP-binding protein 10	GTPBA_HUMAN	301	TRUE	_DFLHLFEK_		553.876	442.744	806.542	393.123
GTPBP10	Homo sapiens	GTP-binding protein 10	GTPBA_HUMAN	315	TRUE	_TVEFQHIIPISAVTGEGIEELKNC[Carbamidomethyl (C)]IR_		422.23	457.576	850.006	382.898
GTPBP10	Homo sapiens	GTP-binding protein 10	GTPBA_HUMAN	173	TRUE	_PAIADYAFTTLKPELGK_		221.855	198.568	316.042	389.335
GTPBP10	Homo sapiens	GTP-binding protein 10	GTPBA_HUMAN	162	TRUE	_SSLLSC[Carbamidomethyl (C)]VSHAKPAIADYAFTTLKPELGK_		71.6028	301.384	445.078	256.617
GTPBP10	Homo sapiens	GTP-binding protein 10	GTPBA_HUMAN	140	TRUE	_IIHLDLK_		247.534	185.708	311.982	210.137
GTPBP10	Homo sapiens	GTP-binding protein 10	GTPBA_HUMAN	358	TRUE	_QLLNLWISDTMSSTEPPSK_		267.047	180.183	302.762	195.334
GTPBP10	Homo sapiens	GTP-binding protein 10	GTPBA_HUMAN	341	TRUE	_KSLDEQANQENDALHKK_		341.029	169.101	238.005	108.573
GTPBP10	Homo sapiens	GTP-binding protein 10	GTPBA_HUMAN	357	TRUE	_KQLLNLWISDTMSSTEPPSK_		96.5883	33.4201	175.88	60.2162
GTPBP10	Homo sapiens	GTP-binding protein 10	GTPBA_HUMAN	342	TRUE	_SLDEQANQENDALHK_		42.9007	12.5476	50.6941	22.0238
GTPBP10	Homo sapiens	GTP-binding protein 10	GTPBA_HUMAN	229	TRUE	_QLLFVVDISGFQLSSHTQYR_		27.1626	23.2261	56.6322
GTPBP10	Homo sapiens	GTP-binding protein 10	GTPBA_HUMAN	1	TRUE	_[Acetyl (Protein N-term)]MVHC[Carbamidomethyl (C)]SC[Carbamidomethyl (C)]VLFRK_		16.458	2.86505	7.27305	47.7388
RAB19	Homo sapiens	Ras-related protein Rab-19	RAB19_HUMAN	20	TRUE	_IILIGDSNVGK_		475.38	302.349	334.861	341.173
DENND11	Homo sapiens	DENN domain-containing protein 11	DEN11_HUMAN	153	TRUE	_SVGILSPSYTLLYR_		230.022	79.5523	141.006	193.103
POTEF	Homo sapiens	POTE ankyrin domain family member F	POTEF_HUMAN	916	TRUE	_LC[Carbamidomethyl (C)]YVALDFEQEMATVASSSSLEK_	1345.34	9664.02	2707.09	1168.1	560.139
POTEF	Homo sapiens	POTE ankyrin domain family member F	POTEF_HUMAN	916	TRUE	_LC[Carbamidomethyl (C)]YVALDFEQEM[Oxidation (M)]ATVASSSSLEK_	1345.34	9664.02	2707.09	1168.1	560.139
VPS37C	Homo sapiens	Vacuolar protein sorting-associated protein 37C	VP37C_HUMAN	53	TRUE	_NLEFQGPLEISR_		564.743	222.485	754.311	605.959
VPS37C	Homo sapiens	Vacuolar protein sorting-associated protein 37C	VP37C_HUMAN	65	TRUE	_SNLSDRYQELR_		195.272	149.504	378.508	233.976
TRAPPC13	Homo sapiens	Trafficking protein particle complex subunit 13	TPC13_HUMAN	270	TRUE	_GVTVIGK_				1590.08	152.296
CNOT1	Homo sapiens	CCR4-NOT transcription complex subunit 1	CNOT1_HUMAN	1665	TRUE	_AVEGLLDATSGADADLLLR_	22.7714	149.534	94.6026	119.117	88.8362
CNOT1	Homo sapiens	CCR4-NOT transcription complex subunit 1	CNOT1_HUMAN	560	TRUE	_ILDVAQDLK_		1410.39	1039.97	1531.69	1295.68
CNOT1	Homo sapiens	CCR4-NOT transcription complex subunit 1	CNOT1_HUMAN	1768	TRUE	_ILLVDER_		1288.91	1017.97	1778.79	1062.88
CNOT1	Homo sapiens	CCR4-NOT transcription complex subunit 1	CNOT1_HUMAN	2130	TRUE	_NLILSAFPR_		880.024	1150.21	1937.31	455.015
CNOT1	Homo sapiens	CCR4-NOT transcription complex subunit 1	CNOT1_HUMAN	2188	TRUE	_SPVTFLSDLR_		916.978	948.466	1552.05	781.912
CNOT1	Homo sapiens	CCR4-NOT transcription complex subunit 1	CNOT1_HUMAN	356	TRUE	_EVTYELDHPGFQIR_		612.843	958.955	1376.97	1118.45
CNOT1	Homo sapiens	CCR4-NOT transcription complex subunit 1	CNOT1_HUMAN	2142	TRUE	_LPDPFTPNLK_		1114.27	552.284	1348.58	822.686
CNOT1	Homo sapiens	CCR4-NOT transcription complex subunit 1	CNOT1_HUMAN	1942	TRUE	_LIALLVK_		1028.74	820.772	1032.83	487.886
CNOT1	Homo sapiens	CCR4-NOT transcription complex subunit 1	CNOT1_HUMAN	1219	TRUE	_SLLLEAYVK_		880.243	685.909	1102.7	678.085
CNOT1	Homo sapiens	CCR4-NOT transcription complex subunit 1	CNOT1_HUMAN	1654	TRUE	_DAIAALGLLQK_		853.788	631.831	1121.14	613.76
CNOT1	Homo sapiens	CCR4-NOT transcription complex subunit 1	CNOT1_HUMAN	1400	TRUE	_AVQELVHPVVDR_		815.562	711.397	862.381	706.437
CNOT1	Homo sapiens	CCR4-NOT transcription complex subunit 1	CNOT1_HUMAN	1051	TRUE	_TVTVTRPTGVSFK_		761.441	656.584	1009.33	658.282
CNOT1	Homo sapiens	CCR4-NOT transcription complex subunit 1	CNOT1_HUMAN	1800	TRUE	_GNAPEGLPQLMEVVR_		869.201	1015.57	724.208	472.954
CNOT1	Homo sapiens	CCR4-NOT transcription complex subunit 1	CNOT1_HUMAN	894	TRUE	_NLFEEYR_		762.737	694.511	959.366	640.252
CNOT1	Homo sapiens	CCR4-NOT transcription complex subunit 1	CNOT1_HUMAN	239	TRUE	_ILPDSGGVAK_		923.31	466.667	825.735	685.328
CNOT1	Homo sapiens	CCR4-NOT transcription complex subunit 1	CNOT1_HUMAN	1858	TRUE	_EWVNLYHSAAAGR_		497.425	574.039	896.687	778.403
CNOT1	Homo sapiens	CCR4-NOT transcription complex subunit 1	CNOT1_HUMAN	2179	TRUE	_DLDSYLK_		726.403	540.757	869.262	587.15
CNOT1	Homo sapiens	CCR4-NOT transcription complex subunit 1	CNOT1_HUMAN	275	TRUE	_NIIVQFGVR_		499.264	587.498	760.714	698.912
CNOT1	Homo sapiens	CCR4-NOT transcription complex subunit 1	CNOT1_HUMAN	460	TRUE	_LAEVGQYEQVK_		542.185	476.584	857.301	542.179
CNOT1	Homo sapiens	CCR4-NOT transcription complex subunit 1	CNOT1_HUMAN	624	TRUE	_C[Carbamidomethyl (C)]PSILGGLAPEKDQPK_		91.5709	821.221	1345.89	141.462
CNOT1	Homo sapiens	CCR4-NOT transcription complex subunit 1	CNOT1_HUMAN	1164	TRUE	_MVLNETYR_		730.074	361.195	725.089	507.377
CNOT1	Homo sapiens	CCR4-NOT transcription complex subunit 1	CNOT1_HUMAN	2264	TRUE	_YLFLNAIANQLR_		513.857	478.559	733.603	424.361
CNOT1	Homo sapiens	CCR4-NOT transcription complex subunit 1	CNOT1_HUMAN	1471	TRUE	_NSFASALR_		466.336	421.425	578.788	650.766
CNOT1	Homo sapiens	CCR4-NOT transcription complex subunit 1	CNOT1_HUMAN	1242	TRUE	_VLESSIR_		641.519	361.504	662.475	450.038
CNOT1	Homo sapiens	CCR4-NOT transcription complex subunit 1	CNOT1_HUMAN	1568	TRUE	_QLAVYEEFAR_		298.1	379.162	942.406	441.342
CNOT1	Homo sapiens	CCR4-NOT transcription complex subunit 1	CNOT1_HUMAN	1088	TRUE	_IVEPPENIQEK_		447.057	469.708	743.716	371.614
CNOT1	Homo sapiens	CCR4-NOT transcription complex subunit 1	CNOT1_HUMAN	1641	TRUE	_SLLEVVVLSR_		391.576	550.94	573.284	458.65
CNOT1	Homo sapiens	CCR4-NOT transcription complex subunit 1	CNOT1_HUMAN	1523	TRUE	_LATEFELR_		564.423	337.457	467.295	603.299
CNOT1	Homo sapiens	CCR4-NOT transcription complex subunit 1	CNOT1_HUMAN	450	TRUE	_SLDLIESLLR_		415.909	479.024	462.143	477.316
CNOT1	Homo sapiens	CCR4-NOT transcription complex subunit 1	CNOT1_HUMAN	1459	TRUE	_EPLLMSISTNLK_		421.33	333.77	548.445	504.358
CNOT1	Homo sapiens	CCR4-NOT transcription complex subunit 1	CNOT1_HUMAN	293	TRUE	_VLGMMAR_		439.09	305.563	513.537	445.986
CNOT1	Homo sapiens	CCR4-NOT transcription complex subunit 1	CNOT1_HUMAN	843	TRUE	_EIDDEANSYFQR_		286.098	109.411	529.89	421.079
CNOT1	Homo sapiens	CCR4-NOT transcription complex subunit 1	CNOT1_HUMAN	1289	TRUE	_NLALDINELKPGNLLK_		366.615	306.608	381.775	275.49
CNOT1	Homo sapiens	CCR4-NOT transcription complex subunit 1	CNOT1_HUMAN	471	TRUE	_QLFSFPIK_		390.497	279.493	427	203.038
CNOT1	Homo sapiens	CCR4-NOT transcription complex subunit 1	CNOT1_HUMAN	1875	TRUE	_AFSAFVGQMHQQGILK_		229.826	296.74	355.891	326.819
CNOT1	Homo sapiens	CCR4-NOT transcription complex subunit 1	CNOT1_HUMAN	1005	TRUE	_MQGSITTPGSIALAQAQAQAQVPAK_		320.339	220.418	306.171	328.529
CNOT1	Homo sapiens	CCR4-NOT transcription complex subunit 1	CNOT1_HUMAN	855	TRUE	_IYNHPPHPTMSVDEVLEMLQR_		191.678	246.34	377.003	354.993
CNOT1	Homo sapiens	CCR4-NOT transcription complex subunit 1	CNOT1_HUMAN	1311	TRUE	_NLDEQLSAPK_		316.135	189.262	320.167	178.425
CNOT1	Homo sapiens	CCR4-NOT transcription complex subunit 1	CNOT1_HUMAN	886	TRUE	_EVFNC[Carbamidomethyl (C)]MLR_		305.296	140.946	286.168	268.662
CNOT1	Homo sapiens	CCR4-NOT transcription complex subunit 1	CNOT1_HUMAN	950	TRUE	_MYYFGIAALDR_		317.497	217.04	232.143	195.296
CNOT1	Homo sapiens	CCR4-NOT transcription complex subunit 1	CNOT1_HUMAN	1824	TRUE	_AHGGPNFMMHSGISQASEYDDPPGLR_		154.573	175.686	415.615	205.406
CNOT1	Homo sapiens	CCR4-NOT transcription complex subunit 1	CNOT1_HUMAN	1913	TRUE	_AQAEQQHNPAANPTMIR_		196.402	190.721	400.043	139.221
CNOT1	Homo sapiens	CCR4-NOT transcription complex subunit 1	CNOT1_HUMAN	1099	TRUE	_IAFIFNNLSQSNMTQK_		147.878	155.688	262.355	317.504
CNOT1	Homo sapiens	CCR4-NOT transcription complex subunit 1	CNOT1_HUMAN	1578	TRUE	_NVPGFLPTNDLSQPTGFLAQPMK_		279.219	220.959	187.486	131.636
CNOT1	Homo sapiens	CCR4-NOT transcription complex subunit 1	CNOT1_HUMAN	1578	TRUE	_NVPGFLPTNDLSQPTGFLAQPM[Oxidation (M)]K_		279.219	220.959	187.486	131.636
CNOT1	Homo sapiens	CCR4-NOT transcription complex subunit 1	CNOT1_HUMAN	2152	TRUE	_VDMLSEINIAPR_		146.306	169.037	325.161	175.147
CNOT1	Homo sapiens	CCR4-NOT transcription complex subunit 1	CNOT1_HUMAN	436	TRUE	_APPEDDNREIATWK_		124.178	139.335	362.871	185.867
CNOT1	Homo sapiens	CCR4-NOT transcription complex subunit 1	CNOT1_HUMAN	1539	TRUE	_RYC[Carbamidomethyl (C)]DPVVLTYQAER_		242.401	223.152	261.728	78.0874
CNOT1	Homo sapiens	CCR4-NOT transcription complex subunit 1	CNOT1_HUMAN	1207	TRUE	_NKPILHTDLDVK_		126.27	130.065	275.844	207.001
CNOT1	Homo sapiens	CCR4-NOT transcription complex subunit 1	CNOT1_HUMAN	808	TRUE	_KLGTSGLNQPTFQQSK_		123.661	197.751	162.561	151.403
CNOT1	Homo sapiens	CCR4-NOT transcription complex subunit 1	CNOT1_HUMAN	2198	TRUE	_SNLQVSNEPGNR_		140.394	154.69	234.399	91.9657
CNOT1	Homo sapiens	CCR4-NOT transcription complex subunit 1	CNOT1_HUMAN	1982	TRUE	_QSEFQQLPYHR_		81.4674	138.717	186.301	128.062
CNOT1	Homo sapiens	CCR4-NOT transcription complex subunit 1	CNOT1_HUMAN	1601	TRUE	_QAWATDDVAQIYDK_		97.5745	108.498	246.862	80.3154
CNOT1	Homo sapiens	CCR4-NOT transcription complex subunit 1	CNOT1_HUMAN	1139	TRUE	_VSIEPNFHSLYSNFLDTLKNPEFNK_		139.761	243.328	83.2895	51.4564
CNOT1	Homo sapiens	CCR4-NOT transcription complex subunit 1	CNOT1_HUMAN	194	TRUE	_GAFGVGQEQIDAFLK_		110.615	50.0511	120.55	151.643
CNOT1	Homo sapiens	CCR4-NOT transcription complex subunit 1	CNOT1_HUMAN	219	TRUE	_C[Carbamidomethyl (C)]PVVLAPLLYPEKR_		128.902	91.0558	143.595	63.898
CNOT1	Homo sapiens	CCR4-NOT transcription complex subunit 1	CNOT1_HUMAN	1723	TRUE	_YNVEAVELLIR_		96.5472	47.0532	135.756	101.186
CNOT1	Homo sapiens	CCR4-NOT transcription complex subunit 1	CNOT1_HUMAN	384	TRUE	_GLGMEVFPVDLIYRPWK_		8.76434	75.4694	150.953	74.1017
CNOT1	Homo sapiens	CCR4-NOT transcription complex subunit 1	CNOT1_HUMAN	1700	TRUE	_AYGSPWC[Carbamidomethyl (C)]NK_		71.153	70.0608	104.863	52.0354
CNOT1	Homo sapiens	CCR4-NOT transcription complex subunit 1	CNOT1_HUMAN	1228	TRUE	_GQQELLYVVPFVAK_		135.529	58.3572	43.7793	31.1968
CNOT1	Homo sapiens	CCR4-NOT transcription complex subunit 1	CNOT1_HUMAN	2352	TRUE	_LFQSVAQC[Carbamidomethyl (C)]C[Carbamidomethyl (C)]MGQK_		88.2274	39.0447	89.2838	28.5499
CNOT1	Homo sapiens	CCR4-NOT transcription complex subunit 1	CNOT1_HUMAN	1775	TRUE	_SVAHVTEADLFHTIETLMR_		9.65909	94.4779	46.1577	39.2808
CNOT1	Homo sapiens	CCR4-NOT transcription complex subunit 1	CNOT1_HUMAN	284	TRUE	_EVTAAQVAR_		278.677		255.734	189.001
CNOT1	Homo sapiens	CCR4-NOT transcription complex subunit 1	CNOT1_HUMAN	27	TRUE	_ASQQEIQHIVNR_		148.343	97.3348		147.315
CNOT1	Homo sapiens	CCR4-NOT transcription complex subunit 1	CNOT1_HUMAN	2164	TRUE	_ILTNFTGVMPPQFK_		111.958	28.8543	59.482
CNOT1	Homo sapiens	CCR4-NOT transcription complex subunit 1	CNOT1_HUMAN	1194	TRUE	_NLGHWLGMITLAK_			83.099	35.6046	32.2507
CNOT1	Homo sapiens	CCR4-NOT transcription complex subunit 1	CNOT1_HUMAN	2234	TRUE	_GSTPSMSTITHSAHMDIFQNLAVDLDTEGR_	28.6932	34.5871		55.9491
CNOT1	Homo sapiens	CCR4-NOT transcription complex subunit 1	CNOT1_HUMAN	328	TRUE	_SDGAQAHTWNVEVLIDVLK_			24.5938	32.2618	17.2034
CNOT1	Homo sapiens	CCR4-NOT transcription complex subunit 1	CNOT1_HUMAN	1447	TRUE	_NLTAGMAMITC[Carbamidomethyl (C)]R_		120.154		220.319
BDP1	Homo sapiens	Transcription factor TFIIIB component B'' homolog	BDP1_HUMAN	225	TRUE	_STPNAEDNEMEEETDDGPLLVPR_		1050.62	593.176	1268.43	479.654
BDP1	Homo sapiens	Transcription factor TFIIIB component B'' homolog	BDP1_HUMAN	107	TRUE	_SSVSVPSESHPLSTINQEAPQPTATSTK_		357.907	241.296	583.424	261.828
BDP1	Homo sapiens	Transcription factor TFIIIB component B'' homolog	BDP1_HUMAN	270	TRUE	_TKGPC[Carbamidomethyl (C)]VVEENDPIFER_		347.828	260.339	628.131	164.674
BDP1	Homo sapiens	Transcription factor TFIIIB component B'' homolog	BDP1_HUMAN	1759	TRUE	_IDAELEEVGPSRR_		93.0467	76.1469	261.177	68.123
BDP1	Homo sapiens	Transcription factor TFIIIB component B'' homolog	BDP1_HUMAN	1617	TRUE	_VLTVSNSQIETEIEVPSSAVPEHR_		121.234	56.9232	230.297	63.5224
BDP1	Homo sapiens	Transcription factor TFIIIB component B'' homolog	BDP1_HUMAN	1386	TRUE	_ISSQTHESDKTEVQGIQSPDVPEQFSDINLSK_		64.6382	43.8262	174.577
BDP1	Homo sapiens	Transcription factor TFIIIB component B'' homolog	BDP1_HUMAN	98	TRUE	_ISSTSSLVK_		69.4077		126.329	33.9435
BDP1	Homo sapiens	Transcription factor TFIIIB component B'' homolog	BDP1_HUMAN	1418	TRUE	_SLPQEQKPLEIKPAPFVR_		150.672		187.129
BDP1	Homo sapiens	Transcription factor TFIIIB component B'' homolog	BDP1_HUMAN	1722	TRUE	_GASNTQLLLK_		50.7701		168.449
BDP1	Homo sapiens	Transcription factor TFIIIB component B'' homolog	BDP1_HUMAN	668	TRUE	_METTERENPEAETVSVLGEK_				131
BDP1	Homo sapiens	Transcription factor TFIIIB component B'' homolog	BDP1_HUMAN	837	TRUE	_ILVSGEMAAALR_		92.6373		63.0476
BDP1	Homo sapiens	Transcription factor TFIIIB component B'' homolog	BDP1_HUMAN	360	TRUE	_RPFDFDFFAHLLQK_				55.8882	18.7028
BDP1	Homo sapiens	Transcription factor TFIIIB component B'' homolog	BDP1_HUMAN	469	TRUE	_QDGANELGVNNLLENATVQAGPSK_				14.3168
SOWAHB	Homo sapiens	Ankyrin repeat domain-containing protein SOWAHB	SWAHB_HUMAN	53	TRUE	_GFVNSVAAVR_		90.7902		141.797	97.2278
ZNF316	Homo sapiens	Zinc finger protein 316	ZN316_HUMAN	939	TRUE	_GATAAPGSGSAPAPAPKPEAAAK_		636.111	414.53	1031.52	619.342
ZNF316	Homo sapiens	Zinc finger protein 316	ZN316_HUMAN	465	TRUE	_SFSQSSALAR_		89.4859	88.9058	307.584	183.574
ZNF316	Homo sapiens	Zinc finger protein 316	ZN316_HUMAN	606	TRUE	_SWLHPDSFPILGLPDFR_		72.3232	86.3915	260.405	79.7174
ZNF316	Homo sapiens	Zinc finger protein 316	ZN316_HUMAN	431	TRUE	_C[Carbamidomethyl (C)]AFC[Carbamidomethyl (C)]GAGFGR_		187.18	132.129	92.0587	14.9018
ZNF316	Homo sapiens	Zinc finger protein 316	ZN316_HUMAN	812	TRUE	_FGQSAALTR_		57.8123	126.475	180.623	54.4776
ZNF316	Homo sapiens	Zinc finger protein 316	ZN316_HUMAN	366	TRUE	_YHAAVKPFGC[Carbamidomethyl (C)]EEC[Carbamidomethyl (C)]GK_		86.9285	59.943	199.011	57.0637
EPOP	Homo sapiens	Elongin BC and Polycomb repressive complex 2-associated protein	EPOP_HUMAN	72	TRUE	_GPQAPLRPGGWAPDGLK_		345.568	235.849	1085.48	272.329
EPOP	Homo sapiens	Elongin BC and Polycomb repressive complex 2-associated protein	EPOP_HUMAN	53	TRUE	_ASSLGPGPGELAAR_		320.875	237.376	640.923	129.905
EPOP	Homo sapiens	Elongin BC and Polycomb repressive complex 2-associated protein	EPOP_HUMAN	31	TRUE	_GTQEFSPLC[Carbamidomethyl (C)]LR_		381.312	93.6521	484.272
EPOP	Homo sapiens	Elongin BC and Polycomb repressive complex 2-associated protein	EPOP_HUMAN	260	TRUE	_GFALDTPSLR_		446.541		440.908
SMCHD1	Homo sapiens	Structural maintenance of chromosomes flexible hinge domain-containing protein 1	SMHD1_HUMAN	1726	TRUE	_IAHLAQIEDDRAAMVISWHLASDMDC[Carbamidomethyl (C)]VVTLTTDAAR_	20.7406	18.7763	46.2654	253.569	200.452
SMCHD1	Homo sapiens	Structural maintenance of chromosomes flexible hinge domain-containing protein 1	SMHD1_HUMAN	906	TRUE	_VTLPGLKEDSQILK_		25003.7	20850.7	32199.8	28027.5
SMCHD1	Homo sapiens	Structural maintenance of chromosomes flexible hinge domain-containing protein 1	SMHD1_HUMAN	1350	TRUE	_SIIEGPIIK_		25367.1	18461.6	27239.3	23432.3
SMCHD1	Homo sapiens	Structural maintenance of chromosomes flexible hinge domain-containing protein 1	SMHD1_HUMAN	241	TRUE	_QAVFFVGQSAR_		24433.1	16085.3	28174.9	23275.1
SMCHD1	Homo sapiens	Structural maintenance of chromosomes flexible hinge domain-containing protein 1	SMHD1_HUMAN	620	TRUE	_TLPLFYGSIVR_		17525.1	15261.7	24478.3	20542.7
SMCHD1	Homo sapiens	Structural maintenance of chromosomes flexible hinge domain-containing protein 1	SMHD1_HUMAN	1771	TRUE	_QQVLPLDSIYKK_		19143	15623.3	23250.5	17048.3
SMCHD1	Homo sapiens	Structural maintenance of chromosomes flexible hinge domain-containing protein 1	SMHD1_HUMAN	1888	TRUE	_GMVFGAPVPK_		18488.4	14534.3	23036.9	18468.6
SMCHD1	Homo sapiens	Structural maintenance of chromosomes flexible hinge domain-containing protein 1	SMHD1_HUMAN	1888	TRUE	_GM[Oxidation (M)]VFGAPVPK_		18488.4	14534.3	23036.9	18468.6
SMCHD1	Homo sapiens	Structural maintenance of chromosomes flexible hinge domain-containing protein 1	SMHD1_HUMAN	1359	TRUE	_LMILPDPEKPVR_		15104.4	15465.8	23914.5	17786.9
SMCHD1	Homo sapiens	Structural maintenance of chromosomes flexible hinge domain-containing protein 1	SMHD1_HUMAN	1359	TRUE	_LM[Oxidation (M)]ILPDPEKPVR_		15104.4	15465.8	23914.5	17786.9
SMCHD1	Homo sapiens	Structural maintenance of chromosomes flexible hinge domain-containing protein 1	SMHD1_HUMAN	169	TRUE	_LLFDETQGKPAVAVIDNGR_		17776.1	14378.8	18835.1	18601.2
SMCHD1	Homo sapiens	Structural maintenance of chromosomes flexible hinge domain-containing protein 1	SMHD1_HUMAN	1247	TRUE	_VQLISGPPAK_		15264.2	11290.8	18971.2	16054
SMCHD1	Homo sapiens	Structural maintenance of chromosomes flexible hinge domain-containing protein 1	SMHD1_HUMAN	1325	TRUE	_ANLGVFSVFAPR_		13116.3	10621.4	16358.5	16254.5
SMCHD1	Homo sapiens	Structural maintenance of chromosomes flexible hinge domain-containing protein 1	SMHD1_HUMAN	227	TRUE	_SLNSDISYFGVGGK_		13575.8	11189.3	16705.5	14205.8
SMCHD1	Homo sapiens	Structural maintenance of chromosomes flexible hinge domain-containing protein 1	SMHD1_HUMAN	1039	TRUE	_LQIFSVEGQK_		13876.9	10790.9	17219.2	13323.3
SMCHD1	Homo sapiens	Structural maintenance of chromosomes flexible hinge domain-containing protein 1	SMHD1_HUMAN	1799	TRUE	_LYFKPIGDPVFAR_		11140.3	9234.8	16137.7	15612.1
SMCHD1	Homo sapiens	Structural maintenance of chromosomes flexible hinge domain-containing protein 1	SMHD1_HUMAN	792	TRUE	_LQVVLNESNADTYAGRPLPSK_		13294.2	11617.8	12726.2	12247.8
SMCHD1	Homo sapiens	Structural maintenance of chromosomes flexible hinge domain-containing protein 1	SMHD1_HUMAN	115	TRUE	_IDFLPHYDTLVK_		12952.3	9363.14	14086.4	13422.3
SMCHD1	Homo sapiens	Structural maintenance of chromosomes flexible hinge domain-containing protein 1	SMHD1_HUMAN	193	TRUE	_QLNNWAVYR_		12454.4	8528.29	15606.1	9691.81
SMCHD1	Homo sapiens	Structural maintenance of chromosomes flexible hinge domain-containing protein 1	SMHD1_HUMAN	35	TRUE	_EKESELGDRPLQVGER_		11245.9	8747.62	14802.5	11375.1
SMCHD1	Homo sapiens	Structural maintenance of chromosomes flexible hinge domain-containing protein 1	SMHD1_HUMAN	72	TRUE	_FVITTTSR_		11003.7	8615.66	13603	10714
SMCHD1	Homo sapiens	Structural maintenance of chromosomes flexible hinge domain-containing protein 1	SMHD1_HUMAN	1240	TRUE	_EFSDFIR_		12104.7	7956.86	11958.4	10359.9
SMCHD1	Homo sapiens	Structural maintenance of chromosomes flexible hinge domain-containing protein 1	SMHD1_HUMAN	1208	TRUE	_TTFQENTQSISVR_		9386.51	8362.87	12533	10709.3
SMCHD1	Homo sapiens	Structural maintenance of chromosomes flexible hinge domain-containing protein 1	SMHD1_HUMAN	499	TRUE	_GLAPIEC[Carbamidomethyl (C)]YNR_		10334.1	8457.95	12723.4	9359.26
SMCHD1	Homo sapiens	Structural maintenance of chromosomes flexible hinge domain-containing protein 1	SMHD1_HUMAN	1543	TRUE	_GSNEEDTDTPLFIGK_		9864.7	5850.96	11342.4	9147.06
SMCHD1	Homo sapiens	Structural maintenance of chromosomes flexible hinge domain-containing protein 1	SMHD1_HUMAN	1013	TRUE	_IEIPSC[Carbamidomethyl (C)]KDVAPVEK_		8397.57	7374.2	12312.9	7720.77
SMCHD1	Homo sapiens	Structural maintenance of chromosomes flexible hinge domain-containing protein 1	SMHD1_HUMAN	526	TRUE	_LTFMDLELK_		7192.07	6212.94	10347	9401.2
SMCHD1	Homo sapiens	Structural maintenance of chromosomes flexible hinge domain-containing protein 1	SMHD1_HUMAN	526	TRUE	_LTFM[Oxidation (M)]DLELK_		7192.07	6212.94	10347	9401.2
SMCHD1	Homo sapiens	Structural maintenance of chromosomes flexible hinge domain-containing protein 1	SMHD1_HUMAN	1495	TRUE	_IKPPTPAVSNVR_		7726.99	5814.79	10295.5	8210.62
SMCHD1	Homo sapiens	Structural maintenance of chromosomes flexible hinge domain-containing protein 1	SMHD1_HUMAN	1233	TRUE	_DLC[Carbamidomethyl (C)]FTWR_		8009.78	5634.22	9865.86	7717.2
SMCHD1	Homo sapiens	Structural maintenance of chromosomes flexible hinge domain-containing protein 1	SMHD1_HUMAN	415	TRUE	_AHVEGDGVVEGIIR_		6846.94	5019.24	8965.8	8794.61
SMCHD1	Homo sapiens	Structural maintenance of chromosomes flexible hinge domain-containing protein 1	SMHD1_HUMAN	1224	TRUE	_FIPGPPGNK_		7363.42	5297.59	8492.25	7544.06
SMCHD1	Homo sapiens	Structural maintenance of chromosomes flexible hinge domain-containing protein 1	SMHD1_HUMAN	558	TRUE	_EFALWLK_		5820.85	4452.14	9752.19	6705.61
SMCHD1	Homo sapiens	Structural maintenance of chromosomes flexible hinge domain-containing protein 1	SMHD1_HUMAN	1267	TRUE	_ESIPVINGR_		6600.7	5646.6	7574.02	6816.53
SMCHD1	Homo sapiens	Structural maintenance of chromosomes flexible hinge domain-containing protein 1	SMHD1_HUMAN	208	TRUE	_QGDFESDHSGYVRPVPVPR_		4847.28	4865.49	8818.89	7098.75
SMCHD1	Homo sapiens	Structural maintenance of chromosomes flexible hinge domain-containing protein 1	SMHD1_HUMAN	1257	TRUE	_LLLIDWPELK_		5198.51	4554.6	7189.49	7494.03
SMCHD1	Homo sapiens	Structural maintenance of chromosomes flexible hinge domain-containing protein 1	SMHD1_HUMAN	1674	TRUE	_IHNIDIPTTQQVPHIEALLK_		4691.52	4384.61	6735.44	6519
SMCHD1	Homo sapiens	Structural maintenance of chromosomes flexible hinge domain-containing protein 1	SMHD1_HUMAN	1642	TRUE	_SLFEASQQLLNEMK_		6006.9	4711.68	5244.14	5464.97
SMCHD1	Homo sapiens	Structural maintenance of chromosomes flexible hinge domain-containing protein 1	SMHD1_HUMAN	1642	TRUE	_SLFEASQQLLNEM[Oxidation (M)]K_		6006.9	4711.68	5244.14	5464.97
SMCHD1	Homo sapiens	Structural maintenance of chromosomes flexible hinge domain-containing protein 1	SMHD1_HUMAN	27	TRUE	_TVYLFDR_		3807.49	4052.37	6675.89	5939.72
SMCHD1	Homo sapiens	Structural maintenance of chromosomes flexible hinge domain-containing protein 1	SMHD1_HUMAN	280	TRUE	_EAIYSGYIR_		4800.84	3271.22	6144.92	5846.27
SMCHD1	Homo sapiens	Structural maintenance of chromosomes flexible hinge domain-containing protein 1	SMHD1_HUMAN	785	TRUE	_LGNYTLK_		4829.58	3916.93	6066.82	4299.71
SMCHD1	Homo sapiens	Structural maintenance of chromosomes flexible hinge domain-containing protein 1	SMHD1_HUMAN	278	TRUE	_NKEAIYSGYIR_		4825.11	4280.32	5592.84	4201.65
SMCHD1	Homo sapiens	Structural maintenance of chromosomes flexible hinge domain-containing protein 1	SMHD1_HUMAN	509	TRUE	_ISGALFTNDKFQVSTNK_		4479.49	3359.78	5534.36	4896.35
SMCHD1	Homo sapiens	Structural maintenance of chromosomes flexible hinge domain-containing protein 1	SMHD1_HUMAN	2	TRUE	_[Acetyl (Protein N-term)]AAADGGGPGGASVGTEEDGGGVGHR_		3820.57	3714.39	5627.89	4763.83
SMCHD1	Homo sapiens	Structural maintenance of chromosomes flexible hinge domain-containing protein 1	SMHD1_HUMAN	1629	TRUE	_EKDQLSQSIVMYK_		4469.67	2921.28	5611.08	4091.04
SMCHD1	Homo sapiens	Structural maintenance of chromosomes flexible hinge domain-containing protein 1	SMHD1_HUMAN	1629	TRUE	_EKDQLSQSIVM[Oxidation (M)]YK_		4469.67	2921.28	5611.08	4091.04
SMCHD1	Homo sapiens	Structural maintenance of chromosomes flexible hinge domain-containing protein 1	SMHD1_HUMAN	681	TRUE	_YVEDEMARLPDR_		5114.42	3020.42	6255.24	2648.23
SMCHD1	Homo sapiens	Structural maintenance of chromosomes flexible hinge domain-containing protein 1	SMHD1_HUMAN	1853	TRUE	_ITHC[Carbamidomethyl (C)]PTLLTR_		3554.55	2666.14	4601.43	3819.3
SMCHD1	Homo sapiens	Structural maintenance of chromosomes flexible hinge domain-containing protein 1	SMHD1_HUMAN	51	TRUE	_SDYAGFR_		3574.3	2901.53	4434.34	3525.3
SMCHD1	Homo sapiens	Structural maintenance of chromosomes flexible hinge domain-containing protein 1	SMHD1_HUMAN	113	TRUE	_ERIDFLPHYDTLVK_		2725.51	2927.54	4209.57	4183.82
SMCHD1	Homo sapiens	Structural maintenance of chromosomes flexible hinge domain-containing protein 1	SMHD1_HUMAN	581	TRUE	_GVITRPDLPSKK_		3212.76	2526.25	3975.08	3980.82
SMCHD1	Homo sapiens	Structural maintenance of chromosomes flexible hinge domain-containing protein 1	SMHD1_HUMAN	449	TRUE	_LKDEDDEDDC[Carbamidomethyl (C)]FILEK_		3280.14	2669.22	4106.43	3045.02
SMCHD1	Homo sapiens	Structural maintenance of chromosomes flexible hinge domain-containing protein 1	SMHD1_HUMAN	1709	TRUE	_SC[Carbamidomethyl (C)]TLPNYTK_		2863.55	1984.6	4130.86	3306.24
SMCHD1	Homo sapiens	Structural maintenance of chromosomes flexible hinge domain-containing protein 1	SMHD1_HUMAN	1919	TRUE	_LDSVNKDLNSQLEYLR_		2987.84	2072.54	3449.71	3299.1
SMCHD1	Homo sapiens	Structural maintenance of chromosomes flexible hinge domain-containing protein 1	SMHD1_HUMAN	681	TRUE	_YVEDEMAR_		2599.91	2090.87	3455.39	2686.96
SMCHD1	Homo sapiens	Structural maintenance of chromosomes flexible hinge domain-containing protein 1	SMHD1_HUMAN	681	TRUE	_YVEDEM[Oxidation (M)]AR_		2599.91	2090.87	3455.39	2686.96
SMCHD1	Homo sapiens	Structural maintenance of chromosomes flexible hinge domain-containing protein 1	SMHD1_HUMAN	1417	TRUE	_LSTSGNRPPANAETFSC[Carbamidomethyl (C)]NK_		3103.74	1920.92	2751.34	2898.15
SMCHD1	Homo sapiens	Structural maintenance of chromosomes flexible hinge domain-containing protein 1	SMHD1_HUMAN	1471	TRUE	_TNILNSEQVIVEVLPNQPVK_		2843.25	2067.19	2638.89	2901.41
SMCHD1	Homo sapiens	Structural maintenance of chromosomes flexible hinge domain-containing protein 1	SMHD1_HUMAN	429	TRUE	_YHPFLYDRETYPDDPC[Carbamidomethyl (C)]FPSK_		2230.96	1687.93	3202.21	2736.43
SMCHD1	Homo sapiens	Structural maintenance of chromosomes flexible hinge domain-containing protein 1	SMHD1_HUMAN	581	TRUE	_GVITRPDLPSK_		2564.65	1832.78	3282.88	1844.96
SMCHD1	Homo sapiens	Structural maintenance of chromosomes flexible hinge domain-containing protein 1	SMHD1_HUMAN	555	TRUE	_IDREFALWLK_		1687.32	1769.29	3343.77	2703.4
SMCHD1	Homo sapiens	Structural maintenance of chromosomes flexible hinge domain-containing protein 1	SMHD1_HUMAN	467	TRUE	_GKRPIFEC[Carbamidomethyl (C)]FWNGR_		772.456	2034.89	3833.38	2842.7
SMCHD1	Homo sapiens	Structural maintenance of chromosomes flexible hinge domain-containing protein 1	SMHD1_HUMAN	1959	TRUE	_LGMTPIR_		2141.18	1554.98	2770.43	2539.8
SMCHD1	Homo sapiens	Structural maintenance of chromosomes flexible hinge domain-containing protein 1	SMHD1_HUMAN	37	TRUE	_ESELGDRPLQVGER_		2181.55	1730.19	2577.27	2336.42
SMCHD1	Homo sapiens	Structural maintenance of chromosomes flexible hinge domain-containing protein 1	SMHD1_HUMAN	1771	TRUE	_QQVLPLDSIYK_		1925.61	1546.52	2626.28	2530.59
SMCHD1	Homo sapiens	Structural maintenance of chromosomes flexible hinge domain-containing protein 1	SMHD1_HUMAN	1925	TRUE	_DLNSQLEYLR_		1981.35	1258.7	2587.83	2677.35
SMCHD1	Homo sapiens	Structural maintenance of chromosomes flexible hinge domain-containing protein 1	SMHD1_HUMAN	289	TRUE	_NRKPSDSVHITNDDER_		1958.67	1681.03	2727.02	1962.32
SMCHD1	Homo sapiens	Structural maintenance of chromosomes flexible hinge domain-containing protein 1	SMHD1_HUMAN	1999	TRUE	_IITKTDV_		2219.7	2227.58	2649.85	1130.55
SMCHD1	Homo sapiens	Structural maintenance of chromosomes flexible hinge domain-containing protein 1	SMHD1_HUMAN	1013	TRUE	_IEIPSC[Carbamidomethyl (C)]K_		2027.36	1112.44	2446.94	2380.44
SMCHD1	Homo sapiens	Structural maintenance of chromosomes flexible hinge domain-containing protein 1	SMHD1_HUMAN	252	TRUE	_MISKPADSQDVHELVLSKEDFEK_		1674.8	1129.09	2561.18	2350.04
SMCHD1	Homo sapiens	Structural maintenance of chromosomes flexible hinge domain-containing protein 1	SMHD1_HUMAN	252	TRUE	_M[Oxidation (M)]ISKPADSQDVHELVLSKEDFEK_		1674.8	1129.09	2561.18	2350.04
SMCHD1	Homo sapiens	Structural maintenance of chromosomes flexible hinge domain-containing protein 1	SMHD1_HUMAN	1603	TRUE	_TLEPYILPFMFYNDVKK_		807.674	1683.19	2516.33	2551.79
SMCHD1	Homo sapiens	Structural maintenance of chromosomes flexible hinge domain-containing protein 1	SMHD1_HUMAN	1603	TRUE	_TLEPYILPFM[Oxidation (M)]FYNDVKK_		807.674	1683.19	2516.33	2551.79
SMCHD1	Homo sapiens	Structural maintenance of chromosomes flexible hinge domain-containing protein 1	SMHD1_HUMAN	545	TRUE	_ILNGQEQR_		1948.01	1509.96	2377.73	1557.48
SMCHD1	Homo sapiens	Structural maintenance of chromosomes flexible hinge domain-containing protein 1	SMHD1_HUMAN	1276	TRUE	_DLQNPIIVQLC[Carbamidomethyl (C)]DQWDNPAPVQHVK_		1515.21	1329.27	2084.94	2056.94
SMCHD1	Homo sapiens	Structural maintenance of chromosomes flexible hinge domain-containing protein 1	SMHD1_HUMAN	1620	TRUE	_QQQMAALTK_		1703.05	1144.98	2640	1477.99
SMCHD1	Homo sapiens	Structural maintenance of chromosomes flexible hinge domain-containing protein 1	SMHD1_HUMAN	480	TRUE	_LIPYTSVEDFDWC[Carbamidomethyl (C)]TPPK_		1819.24	1358.57	1796	1898.3
SMCHD1	Homo sapiens	Structural maintenance of chromosomes flexible hinge domain-containing protein 1	SMHD1_HUMAN	593	TRUE	_QGPWATYAAIEWDGK_		1569.88	1381.66	2013.21	1900.17
SMCHD1	Homo sapiens	Structural maintenance of chromosomes flexible hinge domain-containing protein 1	SMHD1_HUMAN	1763	TRUE	_IYDETQGR_		1386.46	1730.48	2390.29	1350.53
SMCHD1	Homo sapiens	Structural maintenance of chromosomes flexible hinge domain-containing protein 1	SMHD1_HUMAN	1080	TRUE	_EINITSALAEK_		1537.39	1033.43	1890.63	2034.86
SMCHD1	Homo sapiens	Structural maintenance of chromosomes flexible hinge domain-containing protein 1	SMHD1_HUMAN	826	TRUE	_FSFGLLDLPFR_		898.155	1229.37	2141.86	1922.53
SMCHD1	Homo sapiens	Structural maintenance of chromosomes flexible hinge domain-containing protein 1	SMHD1_HUMAN	1726	TRUE	_IAHLAQIEDDR_		1391.57	803.821	1823.24	2120.07
SMCHD1	Homo sapiens	Structural maintenance of chromosomes flexible hinge domain-containing protein 1	SMHD1_HUMAN	1585	TRUE	_DSTEYFIVFEPR_		1290.49	765.206	1900.63	1902.45
SMCHD1	Homo sapiens	Structural maintenance of chromosomes flexible hinge domain-containing protein 1	SMHD1_HUMAN	743	TRUE	_KLLVELK_		1393.86	1124.15	1680.23	1299.77
SMCHD1	Homo sapiens	Structural maintenance of chromosomes flexible hinge domain-containing protein 1	SMHD1_HUMAN	760	TRUE	_EIISHISQHGGK_		1355.05	998.424	2347.05	782
SMCHD1	Homo sapiens	Structural maintenance of chromosomes flexible hinge domain-containing protein 1	SMHD1_HUMAN	1093	TRUE	_VNWTPEINKEHLLQGLLPDVQVPTSVK_		737.735	1037.1	1786.94	1899.86
SMCHD1	Homo sapiens	Structural maintenance of chromosomes flexible hinge domain-containing protein 1	SMHD1_HUMAN	1436	TRUE	_IKDNDKEDGC[Carbamidomethyl (C)]FYFR_		1004.23	910.89	1680.37	1334.03
SMCHD1	Homo sapiens	Structural maintenance of chromosomes flexible hinge domain-containing protein 1	SMHD1_HUMAN	1030	TRUE	_LLPSSHVAR_		1118.88	813.969	1429.47	1216.11
SMCHD1	Homo sapiens	Structural maintenance of chromosomes flexible hinge domain-containing protein 1	SMHD1_HUMAN	394	TRUE	_EIQDDMQTLYVNTAADSFEFK_		1006.81	740.614	1152.15	1438.18
SMCHD1	Homo sapiens	Structural maintenance of chromosomes flexible hinge domain-containing protein 1	SMHD1_HUMAN	880	TRUE	_GPNC[Carbamidomethyl (C)]VIR_		1171.35	691.915	1720.83	726.158
SMCHD1	Homo sapiens	Structural maintenance of chromosomes flexible hinge domain-containing protein 1	SMHD1_HUMAN	1783	TRUE	_TLPDWKR_		825.052	981.617	1583.58	896.347
SMCHD1	Homo sapiens	Structural maintenance of chromosomes flexible hinge domain-containing protein 1	SMHD1_HUMAN	58	TRUE	_AC[Carbamidomethyl (C)]VC[Carbamidomethyl (C)]QTLGISPEEK_		996.038	726.801	1411.03	1123.73
SMCHD1	Homo sapiens	Structural maintenance of chromosomes flexible hinge domain-containing protein 1	SMHD1_HUMAN	1708	TRUE	_RSC[Carbamidomethyl (C)]TLPNYTK_		1000.44	756.487	1444.34	951.874
SMCHD1	Homo sapiens	Structural maintenance of chromosomes flexible hinge domain-containing protein 1	SMHD1_HUMAN	315	TRUE	_EKDSFTAVVITGVQPEHIQYLK_		907.183	785.194	1423.81	1019.29
SMCHD1	Homo sapiens	Structural maintenance of chromosomes flexible hinge domain-containing protein 1	SMHD1_HUMAN	1674	TRUE	_IHNIDIPTTQQVPHIEALLKR_		538.273	1051.36	1330.8	868.37
SMCHD1	Homo sapiens	Structural maintenance of chromosomes flexible hinge domain-containing protein 1	SMHD1_HUMAN	291	TRUE	_KPSDSVHITNDDER_		739.49	705.655	1424.02	909.697
SMCHD1	Homo sapiens	Structural maintenance of chromosomes flexible hinge domain-containing protein 1	SMHD1_HUMAN	305	TRUE	_FLHHLIIEEK_		485.527	735.237	1016.2	1206.11
SMCHD1	Homo sapiens	Structural maintenance of chromosomes flexible hinge domain-containing protein 1	SMHD1_HUMAN	1224	TRUE	_FIPGPPGNKDLC[Carbamidomethyl (C)]FTWR_		688.158	829.622	930.257	979.246
SMCHD1	Homo sapiens	Structural maintenance of chromosomes flexible hinge domain-containing protein 1	SMHD1_HUMAN	469	TRUE	_RPIFEC[Carbamidomethyl (C)]FWNGR_		526.014	619.813	1158.08	1102.06
SMCHD1	Homo sapiens	Structural maintenance of chromosomes flexible hinge domain-containing protein 1	SMHD1_HUMAN	1696	TRUE	_LSEQEELK_		647.174	362.866	992.92	1210.04
SMCHD1	Homo sapiens	Structural maintenance of chromosomes flexible hinge domain-containing protein 1	SMHD1_HUMAN	509	TRUE	_ISGALFTNDK_		858.468	647.942	857.618	736.622
SMCHD1	Homo sapiens	Structural maintenance of chromosomes flexible hinge domain-containing protein 1	SMHD1_HUMAN	1898	TRUE	_QC[Carbamidomethyl (C)]LILGEQIDLLQQYR_		607.519	603.949	863.853	796.02
SMCHD1	Homo sapiens	Structural maintenance of chromosomes flexible hinge domain-containing protein 1	SMHD1_HUMAN	1123	TRUE	_YC[Carbamidomethyl (C)]QVSFQDDHVSLESAFTVRPLPDEPK_		400.32	462.706	932.579	988.675
SMCHD1	Homo sapiens	Structural maintenance of chromosomes flexible hinge domain-containing protein 1	SMHD1_HUMAN	680	TRUE	_KYVEDEMAR_		608.287	479.806	868.831	634.097
SMCHD1	Homo sapiens	Structural maintenance of chromosomes flexible hinge domain-containing protein 1	SMHD1_HUMAN	1102	TRUE	_EHLLQGLLPDVQVPTSVK_		606.679	443.201	571.377	929.849
SMCHD1	Homo sapiens	Structural maintenance of chromosomes flexible hinge domain-containing protein 1	SMHD1_HUMAN	1977	TRUE	_VETTDC[Carbamidomethyl (C)]PVPPKR_		519.472	333.135	567.077	686.15
SMCHD1	Homo sapiens	Structural maintenance of chromosomes flexible hinge domain-containing protein 1	SMHD1_HUMAN	252	TRUE	_MISKPADSQDVHELVLSK_		308.516	284.975	597.196	889.557
SMCHD1	Homo sapiens	Structural maintenance of chromosomes flexible hinge domain-containing protein 1	SMHD1_HUMAN	750	TRUE	_VILHSSSGNKEIISHISQHGGK_		261.245	380.241	747.463	631.754
SMCHD1	Homo sapiens	Structural maintenance of chromosomes flexible hinge domain-containing protein 1	SMHD1_HUMAN	437	TRUE	_ETYPDDPC[Carbamidomethyl (C)]FPSK_		433.532	268.785	635.231	621.598
SMCHD1	Homo sapiens	Structural maintenance of chromosomes flexible hinge domain-containing protein 1	SMHD1_HUMAN	1257	TRUE	_LLLIDWPELKESIPVINGR_		102.951	477.201	794.947	568.8
SMCHD1	Homo sapiens	Structural maintenance of chromosomes flexible hinge domain-containing protein 1	SMHD1_HUMAN	1914	TRUE	_SAVC[Carbamidomethyl (C)]KLDSVNKDLNSQLEYLR_		475.57	746.61	599.212	107.605
SMCHD1	Homo sapiens	Structural maintenance of chromosomes flexible hinge domain-containing protein 1	SMHD1_HUMAN	1093	TRUE	_VNWTPEINK_		317.768	204.297	389.301	470.709
SMCHD1	Homo sapiens	Structural maintenance of chromosomes flexible hinge domain-containing protein 1	SMHD1_HUMAN	1619	TRUE	_KQQQMAALTK_		303.368	261.139	372.702	392.415
SMCHD1	Homo sapiens	Structural maintenance of chromosomes flexible hinge domain-containing protein 1	SMHD1_HUMAN	1516	TRUE	_DLHLSITDDYDNHTGIDLVGTIIATIK_		109.608	138.406	527.607	427.845
SMCHD1	Homo sapiens	Structural maintenance of chromosomes flexible hinge domain-containing protein 1	SMHD1_HUMAN	820	TRUE	_EGKPEKFSFGLLDLPFR_		120.329	290.654	561.823	198.322
SMCHD1	Homo sapiens	Structural maintenance of chromosomes flexible hinge domain-containing protein 1	SMHD1_HUMAN	1873	TRUE	_FGGLQNK_		152.316	118.232	738.116	158.386
SMCHD1	Homo sapiens	Structural maintenance of chromosomes flexible hinge domain-containing protein 1	SMHD1_HUMAN	317	TRUE	_DSFTAVVITGVQPEHIQYLK_		83.763	105.527	516.151	438.154
SMCHD1	Homo sapiens	Structural maintenance of chromosomes flexible hinge domain-containing protein 1	SMHD1_HUMAN	592	TRUE	_KQGPWATYAAIEWDGK_		230.574	145.868	367.949	362.165
SMCHD1	Homo sapiens	Structural maintenance of chromosomes flexible hinge domain-containing protein 1	SMHD1_HUMAN	1695	TRUE	_KLSEQEELKK_		216.417	166.747	405.832	271.192
SMCHD1	Homo sapiens	Structural maintenance of chromosomes flexible hinge domain-containing protein 1	SMHD1_HUMAN	631	TRUE	_FFLYGDHDGEVYATGGEVQIAMEPQALYDEVR_		118.493	161.866	341.414	362.367
SMCHD1	Homo sapiens	Structural maintenance of chromosomes flexible hinge domain-containing protein 1	SMHD1_HUMAN	537	TRUE	_DKNTLFTR_		148.647	168.137	369.834	236.073
SMCHD1	Homo sapiens	Structural maintenance of chromosomes flexible hinge domain-containing protein 1	SMHD1_HUMAN	305	TRUE	_FLHHLIIEEKEK_		32.6377	177.1	343.582	259.762
SMCHD1	Homo sapiens	Structural maintenance of chromosomes flexible hinge domain-containing protein 1	SMHD1_HUMAN	27	TRUE	_TVYLFDRR_		219.67	139.173	253.725	188.269
SMCHD1	Homo sapiens	Structural maintenance of chromosomes flexible hinge domain-containing protein 1	SMHD1_HUMAN	1560	TRUE	_TLEFPFVNGSAEIMSLVLAESSPGR_		32.5981	36.005	223.834	277.715
SMCHD1	Homo sapiens	Structural maintenance of chromosomes flexible hinge domain-containing protein 1	SMHD1_HUMAN	906	TRUE	_VTLPGLK_	166.047	150.185
SMCHD1	Homo sapiens	Structural maintenance of chromosomes flexible hinge domain-containing protein 1	SMHD1_HUMAN	1457	TRUE	_VGTYC[Carbamidomethyl (C)]IQFGFMMDK_		127.775	60.6072	104.097	134.044
SMCHD1	Homo sapiens	Structural maintenance of chromosomes flexible hinge domain-containing protein 1	SMHD1_HUMAN	1603	TRUE	_TLEPYILPFMFYNDVK_		104.436	78.2529	141.761	89.6971
SMCHD1	Homo sapiens	Structural maintenance of chromosomes flexible hinge domain-containing protein 1	SMHD1_HUMAN	1603	TRUE	_TLEPYILPFM[Oxidation (M)]FYNDVK_		104.436	78.2529	141.761	89.6971
SMCHD1	Homo sapiens	Structural maintenance of chromosomes flexible hinge domain-containing protein 1	SMHD1_HUMAN	1762	TRUE	_RIYDETQGR_		111.857	93.1127	153.945	51.9911
SMCHD1	Homo sapiens	Structural maintenance of chromosomes flexible hinge domain-containing protein 1	SMHD1_HUMAN	792	TRUE	_LQVVLNESNADTYAGR_		71.3528	100.256	86.7473	108.747
SMCHD1	Homo sapiens	Structural maintenance of chromosomes flexible hinge domain-containing protein 1	SMHD1_HUMAN	470	TRUE	_PIFEC[Carbamidomethyl (C)]FWNGR_		77.018	32.203	73.7369	177.86
SMCHD1	Homo sapiens	Structural maintenance of chromosomes flexible hinge domain-containing protein 1	SMHD1_HUMAN	932	TRUE	_VKPDSEILVIENGTAFPFQVEVLDESDNITAQPK_		73.3992	79.6206	6.76216	199.874
SMCHD1	Homo sapiens	Structural maintenance of chromosomes flexible hinge domain-containing protein 1	SMHD1_HUMAN	81	TRUE	_EITC[Carbamidomethyl (C)]DNFDETVK_		84.0884		95.1244	73.0997
SMCHD1	Homo sapiens	Structural maintenance of chromosomes flexible hinge domain-containing protein 1	SMHD1_HUMAN	1695	TRUE	_KLSEQEELK_		7.83995	36.6064	86.7169	98.521
SMCHD1	Homo sapiens	Structural maintenance of chromosomes flexible hinge domain-containing protein 1	SMHD1_HUMAN	1337	TRUE	_GEHTLQVK_		12.2	66.818	18.3849	19.0707
SMCHD1	Homo sapiens	Structural maintenance of chromosomes flexible hinge domain-containing protein 1	SMHD1_HUMAN	345	TRUE	_QLAHIYHYYIHGPK_		194.731		437.958	141.888
SMCHD1	Homo sapiens	Structural maintenance of chromosomes flexible hinge domain-containing protein 1	SMHD1_HUMAN	367	TRUE	_EVEPFNNIDIEISMFEK_		59.2426	44.044	218.947	150.645
SMCHD1	Homo sapiens	Structural maintenance of chromosomes flexible hinge domain-containing protein 1	SMHD1_HUMAN	367	TRUE	_EVEPFNNIDIEISM[Oxidation (M)]FEK_		59.2426	44.044	218.947	150.645
SMCHD1	Homo sapiens	Structural maintenance of chromosomes flexible hinge domain-containing protein 1	SMHD1_HUMAN	913	TRUE	_EDSQILK_		89.6189		108.711	59.54
SMCHD1	Homo sapiens	Structural maintenance of chromosomes flexible hinge domain-containing protein 1	SMHD1_HUMAN	1054	TRUE	_HQDEVNWIAGDIMHNLIFQMYDEGER_		9.52861		33.8163	37.284
SMCHD1	Homo sapiens	Structural maintenance of chromosomes flexible hinge domain-containing protein 1	SMHD1_HUMAN	1310	TRUE	_LM[Oxidation (M)]PSNQQHKTDEK_		0.560984	0.562035		14.9867
SMCHD1	Homo sapiens	Structural maintenance of chromosomes flexible hinge domain-containing protein 1	SMHD1_HUMAN	364	TRUE	_TSKEVEPFNNIDIEISMFEK_		396.458	480.298	895.905	630.596
SMCHD1	Homo sapiens	Structural maintenance of chromosomes flexible hinge domain-containing protein 1	SMHD1_HUMAN	519	TRUE	_FQVSTNKLTFM[Oxidation (M)]DLELK_		61.596
ARHGAP42	Homo sapiens	Rho GTPase-activating protein 42	RHG42_HUMAN	556	TRUE	_FQNIVVEILIEHYEK_	48.0106	36.7985	9.78254	0.615686	10.6635
ARHGAP42	Homo sapiens	Rho GTPase-activating protein 42	RHG42_HUMAN	137	TRUE	_ESEK[Biotin]YYSILEK_		1876.24	2254.07	2893.56	145.446
ARHGAP42	Homo sapiens	Rho GTPase-activating protein 42	RHG42_HUMAN	255	TRUE	_SANQDYRPPSQWTMEGYLYVQEK_	23.458	128.031		142.447
METTL15	Homo sapiens	12S rRNA N4-methylcytidine (m4C) methyltransferase	MET15_HUMAN	316	TRUE	_LVALSFHSLEDR_		792.511	617.726	977.565	969.156
METTL15	Homo sapiens	12S rRNA N4-methylcytidine (m4C) methyltransferase	MET15_HUMAN	332	TRUE	_FLLGISMTER_		375.148	156.062	386.833	596.318
METTL15	Homo sapiens	12S rRNA N4-methylcytidine (m4C) methyltransferase	MET15_HUMAN	382	TRUE	_VLSPQDQDVQDNPR_		309.02	154.592	470.359	333.284
METTL15	Homo sapiens	12S rRNA N4-methylcytidine (m4C) methyltransferase	MET15_HUMAN	370	TRUE	_RAPLMWELIHK_		85.2964	281.289	545.784	264.485
METTL15	Homo sapiens	12S rRNA N4-methylcytidine (m4C) methyltransferase	MET15_HUMAN	47	TRUE	_EQTDQTQAQELHR_		248.071	114.504	450.399	221.745
METTL15	Homo sapiens	12S rRNA N4-methylcytidine (m4C) methyltransferase	MET15_HUMAN	290	TRUE	_IFVNNELNELYTGLK_		124.218	61.8682	185.934
METTL15	Homo sapiens	12S rRNA N4-methylcytidine (m4C) methyltransferase	MET15_HUMAN	353	TRUE	_TSQLGSDHENTEEVSMR_		113.596	24.0755	103.942	69.6039
METTL15	Homo sapiens	12S rRNA N4-methylcytidine (m4C) methyltransferase	MET15_HUMAN	353	TRUE	_TSQLGSDHENTEEVSM[Oxidation (M)]R_		113.596	24.0755	103.942	69.6039
METTL15	Homo sapiens	12S rRNA N4-methylcytidine (m4C) methyltransferase	MET15_HUMAN	235	TRUE	_IASAIVQAR_			72.9529	82.8423
CCDC85C	Homo sapiens	Coiled-coil domain-containing protein 85C	CC85C_HUMAN	146	TRUE	_ELVLLLDEER_		268.764	399.678	445.437	547.746
CCDC85C	Homo sapiens	Coiled-coil domain-containing protein 85C	CC85C_HUMAN	2	TRUE	_[Acetyl (Protein N-term)]AKPAATAAAASEELSQVPDEELLR_		278.219	64.094	296.428	265.646
CCDC85C	Homo sapiens	Coiled-coil domain-containing protein 85C	CC85C_HUMAN	43	TRUE	_VGLMLEHGGLMR_		230.894	172.019	284.884	206.133
CCDC85C	Homo sapiens	Coiled-coil domain-containing protein 85C	CC85C_HUMAN	280	TRUE	_LLEGDKLLAQQAGSGEFR_		160.793	260.911	37.6362	165.004
CCDC85C	Homo sapiens	Coiled-coil domain-containing protein 85C	CC85C_HUMAN	358	TRUE	_VLEVHENLDR_		202.557	97.1812	62.7412	139.227
CCDC85C	Homo sapiens	Coiled-coil domain-containing protein 85C	CC85C_HUMAN	368	TRUE	_QLQDSC[Carbamidomethyl (C)]EEDLSEKEK_		70.2885	63.6476	71.8511	79.9892
CCDC85C	Homo sapiens	Coiled-coil domain-containing protein 85C	CC85C_HUMAN	395	TRUE	_KLGDAASSKPSIR_		0.560984	47.4841	67.4862
CCDC85C	Homo sapiens	Coiled-coil domain-containing protein 85C	CC85C_HUMAN	60	TRUE	_LQQHLLEIR_		218.688	119.962	246.139
CCDC85C	Homo sapiens	Coiled-coil domain-containing protein 85C	CC85C_HUMAN	59	TRUE	_RLQQHLLEIR_		198.391		185.944
ARHGAP32	Homo sapiens	Rho GTPase-activating protein 32	RHG32_HUMAN	597	FALSE	_LLTLEEAQAR_		231.434	332.328	456.875	318.563
ARHGAP32	Homo sapiens	Rho GTPase-activating protein 32	RHG32_HUMAN	520	FALSE	_NLAIVWAPNLLR_			95.9082	176.452	189.414
ARHGAP32	Homo sapiens	Rho GTPase-activating protein 32	RHG32_HUMAN	1700	TRUE	_SLYSYAGLAPRPR_		178.522	81.4727	81.9263	191.849
ARHGAP32	Homo sapiens	Rho GTPase-activating protein 32	RHG32_HUMAN	1927	TRUE	_YAASGQESLR_		66.7369	36.2529	110.658	72.2794
ARHGAP32	Homo sapiens	Rho GTPase-activating protein 32	RHG32_HUMAN	466	TRUE	_FSDAVSAATDEER_		117.451	95.1816	137.939
ARHGAP32	Homo sapiens	Rho GTPase-activating protein 32	RHG32_HUMAN	1688	TRUE	_DFAFYNPR_		119.652	34.1618		64.8973
ARHGAP32	Homo sapiens	Rho GTPase-activating protein 32	RHG32_HUMAN	1630	TRUE	_SDYHVTQLQPYFENGRVHYR_				0.5686	4.77351
ARHGAP32	Homo sapiens	Rho GTPase-activating protein 32	RHG32_HUMAN	635	TRUE	_FHTIIEFPLER_			31.0221	146.952
POM121C	Homo sapiens	Nuclear envelope pore membrane protein POM 121C	P121C_HUMAN	388	FALSE	_NAITSSYSSTR_		6851.84	4891.49	8954.62	5675.22
POM121C	Homo sapiens	Nuclear envelope pore membrane protein POM 121C	P121C_HUMAN	399	FALSE	_GISQLWK_		4822.37	2415.85	5105.22	3778.5
POM121C	Homo sapiens	Nuclear envelope pore membrane protein POM 121C	P121C_HUMAN	485	FALSE	_VQLLPSR_		3350.47	3433.33	4949.52	3158.15
POM121C	Homo sapiens	Nuclear envelope pore membrane protein POM 121C	P121C_HUMAN	262	FALSE	_SAIPEQIISSTLSSPSSNAPDPC[Carbamidomethyl (C)]AK_		3268.55	3060.45	3994.58	3749.04
POM121C	Homo sapiens	Nuclear envelope pore membrane protein POM 121C	P121C_HUMAN	243	FALSE	_MVC[Carbamidomethyl (C)]SPVTVR_		3396.32	2742.68	4507.62	3062.68
POM121C	Homo sapiens	Nuclear envelope pore membrane protein POM 121C	P121C_HUMAN	91	TRUE	_TLFASPPAK_		2796.67	2660.55	4348.64	3047.83
POM121C	Homo sapiens	Nuclear envelope pore membrane protein POM 121C	P121C_HUMAN	301	FALSE	_TVEEEDQIFLDGQENKR_		2501.25	2119.85	3915.19	3152.79
POM121C	Homo sapiens	Nuclear envelope pore membrane protein POM 121C	P121C_HUMAN	492	FALSE	_RGEQLTLPPPPQLGYSITAEDLDLEKK_		2146.21	2430.32	4063.33	2536.1
POM121C	Homo sapiens	Nuclear envelope pore membrane protein POM 121C	P121C_HUMAN	287	FALSE	_ETVLSALK_		2271.64	1014.31	2920.9	3229.21
POM121C	Homo sapiens	Nuclear envelope pore membrane protein POM 121C	P121C_HUMAN	655	FALSE	_APPTLQAETATKPQATSAPSPAPK_		2010.09	1802.05	3026.07	2135.18
POM121C	Homo sapiens	Nuclear envelope pore membrane protein POM 121C	P121C_HUMAN	171	TRUE	_VHHFYPSLPTPLLRPSGR_		816.69	1433.64	3577.87	2125.08
POM121C	Homo sapiens	Nuclear envelope pore membrane protein POM 121C	P121C_HUMAN	100	FALSE	_STANGNLLEPR_		1493.36	1012.99	2477.9	1735.45
POM121C	Homo sapiens	Nuclear envelope pore membrane protein POM 121C	P121C_HUMAN	996	FALSE	_IVPAHVPTPIQPTFGGATHSAFGLK_		1339.64	1380.66	2117.43	1866.3
POM121C	Homo sapiens	Nuclear envelope pore membrane protein POM 121C	P121C_HUMAN	301	FALSE	_TVEEEDQIFLDGQENK_		957.897	782.303	1941.88	1651.66
POM121C	Homo sapiens	Nuclear envelope pore membrane protein POM 121C	P121C_HUMAN	301	FALSE	_TVEEEDQIFLDGQENKRR_		1300.68	1288.96	2177.03	234.765
POM121C	Homo sapiens	Nuclear envelope pore membrane protein POM 121C	P121C_HUMAN	75	TRUE	_GSRPLSSFVQK_		1285.54	634.411	1655.84	1024.13
POM121C	Homo sapiens	Nuclear envelope pore membrane protein POM 121C	P121C_HUMAN	2	FALSE	_SPAAAAAGAGER_		823.395	1035.62	1506.71	475.153
POM121C	Homo sapiens	Nuclear envelope pore membrane protein POM 121C	P121C_HUMAN	2	FALSE	_[Acetyl (Protein N-term)]SPAAAAAGAGER_		823.395	1035.62	1506.71	475.153
POM121C	Homo sapiens	Nuclear envelope pore membrane protein POM 121C	P121C_HUMAN	407	FALSE	_NGPSSSPFSSPASSR_		810.947	733.265	1170.97	914.61
POM121C	Homo sapiens	Nuclear envelope pore membrane protein POM 121C	P121C_HUMAN	1	FALSE	_[Acetyl (Protein N-term)]MSPAAAAAGAGER_		1028.83	565.821	1297.17	728.079
POM121C	Homo sapiens	Nuclear envelope pore membrane protein POM 121C	P121C_HUMAN	352	FALSE	_GLNSQSSDDHLNKR_		546.222	433.42	1170.12	559.114
POM121C	Homo sapiens	Nuclear envelope pore membrane protein POM 121C	P121C_HUMAN	432	TRUE	_IREEELC[Carbamidomethyl (C)]HHSSSSTPLAADKESQGEK_		537.242	383.728	812.507	808.411
POM121C	Homo sapiens	Nuclear envelope pore membrane protein POM 121C	P121C_HUMAN	492	FALSE	_RGEQLTLPPPPQLGYSITAEDLDLEK_		639.173	698.717	754.227	433.913
POM121C	Homo sapiens	Nuclear envelope pore membrane protein POM 121C	P121C_HUMAN	484	FALSE	_KVQLLPSR_		510.422	387.699	593.75	600.664
POM121C	Homo sapiens	Nuclear envelope pore membrane protein POM 121C	P121C_HUMAN	111	TRUE	_TLLEGPDPAELLLMGSYLGKPGPPQPAPAPEGQDLR_		271.77	498.709	722.751	540.17
POM121C	Homo sapiens	Nuclear envelope pore membrane protein POM 121C	P121C_HUMAN	519	FALSE	_ASLQWFNQALEDK_		428.527	391.478	740.294	408.443
POM121C	Homo sapiens	Nuclear envelope pore membrane protein POM 121C	P121C_HUMAN	209	TRUE	_YPIHQTQYSC[Carbamidomethyl (C)]PGVLPTVC[Carbamidomethyl (C)]WNGYHK_		161.725	294.951	372.401	278.556
POM121C	Homo sapiens	Nuclear envelope pore membrane protein POM 121C	P121C_HUMAN	935	FALSE	_SPLPSYPGANPQPAFGAAEGQPPGAAK_		292.919	158.99	225.06	332.853
POM121C	Homo sapiens	Nuclear envelope pore membrane protein POM 121C	P121C_HUMAN	581	FALSE	_MQTPPSLPPC[Carbamidomethyl (C)]PESAGAATTEALSPPK_		401.81		241.847	173.218
POM121C	Homo sapiens	Nuclear envelope pore membrane protein POM 121C	P121C_HUMAN	131	TRUE	_PGPPQPAPAPEGQDLR_		194.263	188.575	239.479	248.414
POM121C	Homo sapiens	Nuclear envelope pore membrane protein POM 121C	P121C_HUMAN	195	TRUE	_GTLPDRFVITPR_		112.793	81.2861	226.052	60.9732
POM121C	Homo sapiens	Nuclear envelope pore membrane protein POM 121C	P121C_HUMAN	300	FALSE	_RTVEEEDQIFLDGQENK_		107.135		298.024	113.714
A2ML1	Homo sapiens	Alpha-2-macroglobulin-like protein 1	A2ML1_HUMAN	593	TRUE	_AVDESVLLLRPDR_		1710.45	2988.3	1767.48	1472.78
A2ML1	Homo sapiens	Alpha-2-macroglobulin-like protein 1	A2ML1_HUMAN	65	TRUE	_LLEYSGLK_		1279.71	1595.13	618.749	1016.97
A2ML1	Homo sapiens	Alpha-2-macroglobulin-like protein 1	A2ML1_HUMAN	1275	TRUE	_TFNIQSVNR_		858.547	1244.17	380.757	242.074
A2ML1	Homo sapiens	Alpha-2-macroglobulin-like protein 1	A2ML1_HUMAN	991	TRUE	_AGLLTEEIR_		415.084	970.114		620.022
A2ML1	Homo sapiens	Alpha-2-macroglobulin-like protein 1	A2ML1_HUMAN	98	TRUE	_VSGVGNNISFEEK_		493.34	894.899	360.888	365.811
A2ML1	Homo sapiens	Alpha-2-macroglobulin-like protein 1	A2ML1_HUMAN	750	TRUE	_EAVHVTVPDAITEWK_		535.251	763.171	300.524	313.242
A2ML1	Homo sapiens	Alpha-2-macroglobulin-like protein 1	A2ML1_HUMAN	451	TRUE	_SFLGIHR_		731.631	760.173	300.342	98.5715
A2ML1	Homo sapiens	Alpha-2-macroglobulin-like protein 1	A2ML1_HUMAN	1218	TRUE	_ATSIVAWLAK_		416.395	803.656	389.48	263.915
A2ML1	Homo sapiens	Alpha-2-macroglobulin-like protein 1	A2ML1_HUMAN	52	TRUE	_FTVTLETK_		289.045	734.749	222.736	479.024
A2ML1	Homo sapiens	Alpha-2-macroglobulin-like protein 1	A2ML1_HUMAN	1051	TRUE	_FIFIDPK_		312.786	694.205	239.663	210.242
A2ML1	Homo sapiens	Alpha-2-macroglobulin-like protein 1	A2ML1_HUMAN	1002	TRUE	_AVGFLEIGYQK_		236.921	814.2	171.42	130.1
A2ML1	Homo sapiens	Alpha-2-macroglobulin-like protein 1	A2ML1_HUMAN	31	TRUE	_LNFPSVQK_		390.194	437.128	238.72	229.124
A2ML1	Homo sapiens	Alpha-2-macroglobulin-like protein 1	A2ML1_HUMAN	894	TRUE	_SDTLIKPVLVKPEGVLVEK_		272.398	409.23	145.972	94.4054
A2ML1	Homo sapiens	Alpha-2-macroglobulin-like protein 1	A2ML1_HUMAN	434	TRUE	_YYQNAYLHLRPFYSTTR_		109.788	166.417	230.055	105.026
A2ML1	Homo sapiens	Alpha-2-macroglobulin-like protein 1	A2ML1_HUMAN	228	TRUE	_ELSTVQESFLVK_		97.6761	335.119	57.3581	18.7655
A2ML1	Homo sapiens	Alpha-2-macroglobulin-like protein 1	A2ML1_HUMAN	262	TRUE	_ANTYWYR_		96.5093	273.524
A2ML1	Homo sapiens	Alpha-2-macroglobulin-like protein 1	A2ML1_HUMAN	808	TRUE	_LTATIFNYLK_		7.84514	58.4952	19.6879	32.1244
A2ML1	Homo sapiens	Alpha-2-macroglobulin-like protein 1	A2ML1_HUMAN	205	TRUE	_TFGTFSVEEYVLPK_		267.601	182.019	51.7504
A2ML1	Homo sapiens	Alpha-2-macroglobulin-like protein 1	A2ML1_HUMAN	1360	TRUE	_SSSNMAIVEVK_			158.022	52.0344	17.2068
A2ML1	Homo sapiens	Alpha-2-macroglobulin-like protein 1	A2ML1_HUMAN	434	TRUE	_YYQNAYLHLR_			77.441
EFCAB7	Homo sapiens	EF-hand calcium-binding domain-containing protein 7	EFCB7_HUMAN	494	TRUE	_ALELTEAC[Carbamidomethyl (C)]PFVIDIYAEK_		2388.48	1032.04	377.949	571.318
EFCAB7	Homo sapiens	EF-hand calcium-binding domain-containing protein 7	EFCB7_HUMAN	591	TRUE	_GLNIFAVEVGPK_		439.987	462.639	809.609	491.21
DDX11L8	Homo sapiens	Putative ATP-dependent RNA helicase DDX11-like protein 8	D11L8_HUMAN	887	FALSE	_ATFGPAIAAVQK_		322.565	215.504	322.022	173.919
DDX11L8	Homo sapiens	Putative ATP-dependent RNA helicase DDX11-like protein 8	D11L8_HUMAN	276	FALSE	_SLGSVQLINDR_		244.665	41.0079	354.58	240.943
CEBPZOS	Homo sapiens	Protein CEBPZOS	CEBOS_HUMAN	4	TRUE	_TLEPLAK_		600.613	270.91	568.202	260.181
ZNF724	Homo sapiens	Zinc finger protein 724	ZN724_HUMAN	470554	FALSE	_IIHTGEKPYKC[Carbamidomethyl (C)]EEC[Carbamidomethyl (C)]GK_		290.806	204.005	563.012	258.372
ZNF724	Homo sapiens	Zinc finger protein 724	ZN724_HUMAN	570	FALSE	_AFNWSSTLTK_		322.097	307.937	394.381	208.533
ZNF724	Homo sapiens	Zinc finger protein 724	ZN724_HUMAN	359387415471555	FALSE	_IHTGEKPYKC[Carbamidomethyl (C)]EEC[Carbamidomethyl (C)]GK_		304.654	242.465	347.825	298.552
ZNF724	Homo sapiens	Zinc finger protein 724	ZN724_HUMAN	290	FALSE	_AFNQSSTLTR_		102.923	28.3596	283.48	153.666
ZNF724	Homo sapiens	Zinc finger protein 724	ZN724_HUMAN	318	FALSE	_AFNQSSNLTK_		76.1289	79.2428	257.297	118.693
ZNF724	Homo sapiens	Zinc finger protein 724	ZN724_HUMAN	542	TRUE	_AFYQYSNLTQHK_		15.9309	157.997	109.153
PHF20L1	Homo sapiens	PHD finger protein 20-like protein 1	P20L1_HUMAN	418	TRUE	_LATLPMPDDSVEK_		1355.64	1779.34	2178.76	583.435
PHF20L1	Homo sapiens	PHD finger protein 20-like protein 1	P20L1_HUMAN	19	TRUE	_LEALDYLQK_		1677.28	1202.85	1906.38	985.864
PHF20L1	Homo sapiens	PHD finger protein 20-like protein 1	P20L1_HUMAN	250	TRUE	_MVFPQPESTLSNK_		772.539	655.179	1458.62	516.035
PHF20L1	Homo sapiens	PHD finger protein 20-like protein 1	P20L1_HUMAN	469	TRUE	_LGPC[Carbamidomethyl (C)]LPLDLSR_		302.605	132.222	600.382	218.477
PHF20L1	Homo sapiens	PHD finger protein 20-like protein 1	P20L1_HUMAN	250	TRUE	_MVFPQPESTLSNKR_		199.337	106.379	372.535	306.789
PHF20L1	Homo sapiens	PHD finger protein 20-like protein 1	P20L1_HUMAN	54	TRUE	_YDEWIYWDSNR_		256.848	206.465	230.689	120.807
PHF20L1	Homo sapiens	PHD finger protein 20-like protein 1	P20L1_HUMAN	4	TRUE	_KPPNRPGITFEIGAR_			280.806	739.669	356.14
PHF20L1	Homo sapiens	PHD finger protein 20-like protein 1	P20L1_HUMAN	113	TRUE	_EGTFTVQFYDGVIR_		78.7898	105.853	73.1042	56.5102
PHF20L1	Homo sapiens	PHD finger protein 20-like protein 1	P20L1_HUMAN	89	TRUE	_AGEEVLAR_		118.293		191.515	118.343
PHF20L1	Homo sapiens	PHD finger protein 20-like protein 1	P20L1_HUMAN	76	TRUE	_EGLKDEEDFFDFK_		70.3225		136.019	112.664
PHF20L1	Homo sapiens	PHD finger protein 20-like protein 1	P20L1_HUMAN	750	TRUE	_MC[Carbamidomethyl (C)]GLSFFK_		35.5652		81.7424
PHF20L1	Homo sapiens	PHD finger protein 20-like protein 1	P20L1_HUMAN	480	TRUE	_GSEVTAPVASDSSYR_		95.2032	17.5335
SNRPGP15;SNRPG	Homo sapiens	Putative small nuclear ribonucleoprotein G-like protein 15;Small nuclear ribonucleoprotein G	RUXGL_HUMAN;RUXG_HUMAN	64;64	TRUE	_GNSIIMLEALERV_		125660	74708.8	95319.1	184824
SNRPGP15;SNRPG	Homo sapiens	Putative small nuclear ribonucleoprotein G-like protein 15;Small nuclear ribonucleoprotein G	RUXGL_HUMAN;RUXG_HUMAN	64;64	TRUE	_GNSIIM[Oxidation (M)]LEALERV_		125660	74708.8	95319.1	184824
SNRPGP15;SNRPG	Homo sapiens	Putative small nuclear ribonucleoprotein G-like protein 15;Small nuclear ribonucleoprotein G	RUXGL_HUMAN;RUXG_HUMAN	26;26	TRUE	_HVQGILR_		57725.2	32880.2	48993	67681.7
SNRPGP15;SNRPG	Homo sapiens	Putative small nuclear ribonucleoprotein G-like protein 15;Small nuclear ribonucleoprotein G	RUXGL_HUMAN;RUXG_HUMAN	64;64	TRUE	_GNSIIMLEALER_		22366.5	9497.16	20142.9	54450.6
SNRPGP15;SNRPG	Homo sapiens	Putative small nuclear ribonucleoprotein G-like protein 15;Small nuclear ribonucleoprotein G	RUXGL_HUMAN;RUXG_HUMAN	64;64	TRUE	_GNSIIM[Oxidation (M)]LEALER_		22366.5	9497.16	20142.9	54450.6
SNRPGP15;SNRPG	Homo sapiens	Putative small nuclear ribonucleoprotein G-like protein 15;Small nuclear ribonucleoprotein G	RUXGL_HUMAN;RUXG_HUMAN	4;4	TRUE	_AHPPELK_		4578.11	1893.87	3033.56	6309.09
NUDT19	Homo sapiens	Acyl-coenzyme A diphosphatase NUDT19	NUD19_HUMAN	284	TRUE	_ALEGLER_			5081.27	9136.32	9539.44
NUDT19	Homo sapiens	Acyl-coenzyme A diphosphatase NUDT19	NUD19_HUMAN	89	TRUE	_FGLGPAPFSR_		314.745	186.003	155.469	212.796
NUDT19	Homo sapiens	Acyl-coenzyme A diphosphatase NUDT19	NUD19_HUMAN	131	TRUE	_EAFEEAGVLLLRPR_		96.9933	192.728	247.064	131.573
NUDT19	Homo sapiens	Acyl-coenzyme A diphosphatase NUDT19	NUD19_HUMAN	267	TRUE	_LANFASLSDLHK_		114.264	174.827	135.471	176.234
NUDT19	Homo sapiens	Acyl-coenzyme A diphosphatase NUDT19	NUD19_HUMAN	99	TRUE	_TAFPSLPDTDDHKTDNTGTLPEDVAFR_		55.1856	30.245		0.57106
COL6A5	Homo sapiens	Collagen alpha-5(VI) chain	CO6A5_HUMAN	1842	TRUE	_DVGNAMR_		21.7907	24.9341	46.4022	0.571057
ADH1	Saccharomyces cerevisiae (strain ATCC 204508 / S288c)	Alcohol dehydrogenase 1		288	FALSE	_SISIVGSYVGNR_	1.63904e+06	1.97108e+06	1.92034e+06	1.93968e+06	1.73251e+06
ADH1	Saccharomyces cerevisiae (strain ATCC 204508 / S288c)	Alcohol dehydrogenase 1		304	FALSE	_EALDFFAR_	499601	2337091	2.03203e+06	2.07979e+06	1.89958e+06
ADH1	Saccharomyces cerevisiae (strain ATCC 204508 / S288c)	Alcohol dehydrogenase 1		320	TRUE	_VVGLSTLPEIYEK_	1.30224e+06	1.356e+06	1.18548e+06	1.21573e+06	1.12399e+06
ADH1	Saccharomyces cerevisiae (strain ATCC 204508 / S288c)	Alcohol dehydrogenase 1		31	TRUE	_ANELLINVK_	989928	1.19683e+06	1.14961e+06	1.25516e+06	1.32917e+06
ADH1	Saccharomyces cerevisiae (strain ATCC 204508 / S288c)	Alcohol dehydrogenase 1		85	FALSE	_IGDYAGIK_	13477.1	1.22752e+06	1.45393e+06	1.4929e+06	1.31492e+06
ADH1	Saccharomyces cerevisiae (strain ATCC 204508 / S288c)	Alcohol dehydrogenase 1		227	TRUE	_DIVGAVLK_	636089	961563	1.02467e+06	934428	852384
ADH1	Saccharomyces cerevisiae (strain ATCC 204508 / S288c)	Alcohol dehydrogenase 1		198	TRUE	_VLGIDGGEGKEELFR_	83572.9	1.00025e+06	996708	871434	889839
ADH1	Saccharomyces cerevisiae (strain ATCC 204508 / S288c)	Alcohol dehydrogenase 1		342	FALSE	_YVVDTSK_	487821	535628	616301	592905	551554
ADH1	Saccharomyces cerevisiae (strain ATCC 204508 / S288c)	Alcohol dehydrogenase 1		2	FALSE	_[Acetyl (Protein N-term)]SIPETQK_	437097	439562	482348	475196	466410
ADH1	Saccharomyces cerevisiae (strain ATCC 204508 / S288c)	Alcohol dehydrogenase 1		2	FALSE	_SIPETQK_	437097	439562	482348	475196	466410
ADH1	Saccharomyces cerevisiae (strain ATCC 204508 / S288c)	Alcohol dehydrogenase 1		213	TRUE	_SIGGEVFIDFTK_	552136	452053	372318	380554	446936
ADH1	Saccharomyces cerevisiae (strain ATCC 204508 / S288c)	Alcohol dehydrogenase 1		235	TRUE	_ATDGGAHGVINVSVSEAAIEASTR_	175610	540636	478156	443584	423399
ADH1	Saccharomyces cerevisiae (strain ATCC 204508 / S288c)	Alcohol dehydrogenase 1		277	TRUE	_C[Carbamidomethyl (C)]C[Carbamidomethyl (C)]SDVFNQVVK_	357234	398163	421091	383472	376924
ADH1	Saccharomyces cerevisiae (strain ATCC 204508 / S288c)	Alcohol dehydrogenase 1		198	TRUE	_VLGIDGGEGK_	337759	334687	386723	351890	366057
ADH1	Saccharomyces cerevisiae (strain ATCC 204508 / S288c)	Alcohol dehydrogenase 1		9	TRUE	_GVIFYESHGKLEYK_	214535	224480	236430	244076	239800
ADH1	Saccharomyces cerevisiae (strain ATCC 204508 / S288c)	Alcohol dehydrogenase 1		23	FALSE	_DIPVPKPK_	172607	176976	196099	193540	188079
ADH1	Saccharomyces cerevisiae (strain ATCC 204508 / S288c)	Alcohol dehydrogenase 1		9	TRUE	_GVIFYESHGK_	148348	140892	168774	158505	166807
ADH1	Saccharomyces cerevisiae (strain ATCC 204508 / S288c)	Alcohol dehydrogenase 1		61	FALSE	_LPLVGGHEGAGVVVGMGENVK_	124504	153370	125561	121340	114575
ADH1	Saccharomyces cerevisiae (strain ATCC 204508 / S288c)	Alcohol dehydrogenase 1		61	FALSE	_LPLVGGHEGAGVVVGM[Oxidation (M)]GENVK_	124504	153370	125561	121340	114575
ADH1	Saccharomyces cerevisiae (strain ATCC 204508 / S288c)	Alcohol dehydrogenase 1		262	TRUE	_ANGTTVLVGMPAGAK_	97182.5	93755.8	101435	87985.7	96566.5
ADH1	Saccharomyces cerevisiae (strain ATCC 204508 / S288c)	Alcohol dehydrogenase 1		262	TRUE	_ANGTTVLVGM[Oxidation (M)]PAGAK_	97182.5	93755.8	101435	87985.7	96566.5
ADH1	Saccharomyces cerevisiae (strain ATCC 204508 / S288c)	Alcohol dehydrogenase 1		225	TRUE	_EKDIVGAVLK_	93197.7	78452.9	89189.2	76124.2	81920.8
ADH1	Saccharomyces cerevisiae (strain ATCC 204508 / S288c)	Alcohol dehydrogenase 1		235	TRUE	_ATDGGAHGVINVSVSEAAIEASTRYVR_	47320.8	45199.9	38332.3	39529.1	37737.2
ADH1	Saccharomyces cerevisiae (strain ATCC 204508 / S288c)	Alcohol dehydrogenase 1		29	TRUE	_PKANELLINVK_	25734	21526.7	27273.5	21406	23887.4
ADH1	Saccharomyces cerevisiae (strain ATCC 204508 / S288c)	Alcohol dehydrogenase 1		277	TRUE	_C[Carbamidomethyl (C)]C[Carbamidomethyl (C)]SDVFNQVVKSISIVGSYVGNRADTR_	23804.2	18139.2	19938.9	19182.2	16612.7
ADH1	Saccharomyces cerevisiae (strain ATCC 204508 / S288c)	Alcohol dehydrogenase 1		165	TRUE	_SANLM[Oxidation (M)]AGHWVAISGAAGGLGSLAVQYAK_	17382.9	15950.6	15272.1	16535.9	15725.6
ADH1	Saccharomyces cerevisiae (strain ATCC 204508 / S288c)	Alcohol dehydrogenase 1		165	TRUE	_SANLMAGHWVAISGAAGGLGSLAVQYAK_	17382.9	15950.6	15272.1	16535.9	15725.6
ADH1	Saccharomyces cerevisiae (strain ATCC 204508 / S288c)	Alcohol dehydrogenase 1		316	TRUE	_SPIKVVGLSTLPEIYEK_	13606.3	19446.6	11109	8398.3	12888.1
ADH1	Saccharomyces cerevisiae (strain ATCC 204508 / S288c)	Alcohol dehydrogenase 1		277	TRUE	_C[Carbamidomethyl (C)]C[Carbamidomethyl (C)]SDVFNQVVKSISIVGSYVGNR_	10794.8	9639.34	8870.66	7863.77	7094.44
ADH1	Saccharomyces cerevisiae (strain ATCC 204508 / S288c)	Alcohol dehydrogenase 1		213	TRUE	_SIGGEVFIDFTKEK_	8160.54	8345.63	7137.43	7122.98	6464.07
ADH1	Saccharomyces cerevisiae (strain ATCC 204508 / S288c)	Alcohol dehydrogenase 1		235	TRUE	_ATDGGAHGVINVSVSEAAIEASTRYVRANGTTVLVGM[Oxidation (M)]PAGAK_	8049.24	6587.28	6453.53	5836.76	5476.69
ADH1	Saccharomyces cerevisiae (strain ATCC 204508 / S288c)	Alcohol dehydrogenase 1		235	TRUE	_ATDGGAHGVINVSVSEAAIEASTRYVRANGTTVLVGMPAGAK_	8049.24	6587.28	6453.53	5836.76	5476.69
ADH1	Saccharomyces cerevisiae (strain ATCC 204508 / S288c)	Alcohol dehydrogenase 1		2	TRUE	_[Acetyl (Protein N-term)]SIPETQKGVIFYESHGKLEYK_	4251.23	5305.83	4740.55	4698.41	4298.02
ADH1	Saccharomyces cerevisiae (strain ATCC 204508 / S288c)	Alcohol dehydrogenase 1		2	TRUE	_SIPETQKGVIFYESHGKLEYK_	4251.23	5305.83	4740.55	4698.41	4298.02
ADH1	Saccharomyces cerevisiae (strain ATCC 204508 / S288c)	Alcohol dehydrogenase 1		9	TRUE	_GVIFYESHGKLEYKDIPVPK_	3466.44	4087.16	3384.41	3695.85	3211.98
ADH1	Saccharomyces cerevisiae (strain ATCC 204508 / S288c)	Alcohol dehydrogenase 1		213	TRUE	_SIGGEVFIDFTKEKDIVGAVLK_	3131.42	3649.49	2378.38	2854.97	2144.8
ADH1	Saccharomyces cerevisiae (strain ATCC 204508 / S288c)	Alcohol dehydrogenase 1		82	FALSE	_GWKIGDYAGIK_	527.145	635.793	577.854	589.346	500.181
ADH1	Saccharomyces cerevisiae (strain ATCC 204508 / S288c)	Alcohol dehydrogenase 1		300	FALSE	_ADTREALDFFAR_	377.078	501.21	418.296	453.833	439.764
ADH1	Saccharomyces cerevisiae (strain ATCC 204508 / S288c)	Alcohol dehydrogenase 1		227	TRUE	_DIVGAVLKATDGGAHGVINVSVSEAAIEASTR_	340.54	557.005	299.897	446.394	328.149
ADH1	Saccharomyces cerevisiae (strain ATCC 204508 / S288c)	Alcohol dehydrogenase 1		312	TRUE	_GLVKSPIKVVGLSTLPEIYEK_	243.181	384.898	358.134	113.592	183.126
ADH1	Saccharomyces cerevisiae (strain ATCC 204508 / S288c)	Alcohol dehydrogenase 1		23	TRUE	_DIPVPKPKANELLINVK_	121.48	315.288	346.095	269.5	205.846
ADH1	Saccharomyces cerevisiae (strain ATCC 204508 / S288c)	Alcohol dehydrogenase 1		288	FALSE	_SISIVGSYVGNRADTREALDFFAR_	185.256	123.829	174.986	289.828	182.358
ADH1	Saccharomyces cerevisiae (strain ATCC 204508 / S288c)	Alcohol dehydrogenase 1		19	TRUE	_LEYKDIPVPKPK_	299.664	30.1964	273.717	153.435	180.497
ADH1	Saccharomyces cerevisiae (strain ATCC 204508 / S288c)	Alcohol dehydrogenase 1		19	TRUE	_LEYKDIPVPK_	155.197	167.952	190.756	115.122	159.461
ADH1	Saccharomyces cerevisiae (strain ATCC 204508 / S288c)	Alcohol dehydrogenase 1		162	TRUE	_ALKSANLM[Oxidation (M)]AGHWVAISGAAGGLGSLAVQYAK_	198.827	70.1792	77.6947	227.495	127.684
ADH1	Saccharomyces cerevisiae (strain ATCC 204508 / S288c)	Alcohol dehydrogenase 1		61	FALSE	_LPLVGGHEGAGVVVGMGENVKGWK_	25.7003	66.2341	47.0737	87.7976	50.7864
ADH1	Saccharomyces cerevisiae (strain ATCC 204508 / S288c)	Alcohol dehydrogenase 1		40	TRUE	_YSGVC[Carbamidomethyl (C)]HTDLHAWHGDWPLPVKLPLVGGHEGAGVVVGM[Oxidation (M)]GENVK_	79.4101	30.0027	28.2139	55.7787	19.8988
ADH1	Saccharomyces cerevisiae (strain ATCC 204508 / S288c)	Alcohol dehydrogenase 1		288	FALSE	_SISIVGSYVGNRADTR_	2052.85	1792.68	1651.12	1434.18	1876.16
ADH1	Saccharomyces cerevisiae (strain ATCC 204508 / S288c)	Alcohol dehydrogenase 1		2	TRUE	_[Acetyl (Protein N-term)]SIPETQKGVIFYESHGK_	2907.31	2995.16	2357.76	2234.02	2894.06
ADH1	Saccharomyces cerevisiae (strain ATCC 204508 / S288c)	Alcohol dehydrogenase 1		2	TRUE	_SIPETQKGVIFYESHGK_	2907.31	2995.16	2357.76	2234.02	2894.06
ADH1	Saccharomyces cerevisiae (strain ATCC 204508 / S288c)	Alcohol dehydrogenase 1		336	TRUE	_GQIVGRYVVDTSK_	191.722	140.116
ADH1	Saccharomyces cerevisiae (strain ATCC 204508 / S288c)	Alcohol dehydrogenase 1		320	TRUE	_VVGLSTLPEIYEKMEK_	186.29	62.0917	14.7467
ADH1	Saccharomyces cerevisiae (strain ATCC 204508 / S288c)	Alcohol dehydrogenase 1		320	TRUE	_VVGLSTLPEIYEKM[Oxidation (M)]EK_	186.29	62.0917	14.7467
ADH1	Saccharomyces cerevisiae (strain ATCC 204508 / S288c)	Alcohol dehydrogenase 1		312	FALSE	_GLVKSPIK_	55.1614			21.7448
ADH2	Saccharomyces cerevisiae (strain ATCC 204508 / S288c)	Alcohol dehydrogenase 2		40	TRUE	_YSGVC[Carbamidomethyl (C)]HTDLHAWHGDWPLPTK_	160312	212040	220861	210617	192231
ADH2	Saccharomyces cerevisiae (strain ATCC 204508 / S288c)	Alcohol dehydrogenase 2		40	TRUE	_YSGVC[Carbamidomethyl (C)]HTDLHAWHGDWPLPTKLPLVGGHEGAGVVVGMGENVK_	8564.82	10439.5	8982.57	12450.5	9262.03
ADH2	Saccharomyces cerevisiae (strain ATCC 204508 / S288c)	Alcohol dehydrogenase 2		40	TRUE	_YSGVC[Carbamidomethyl (C)]HTDLHAWHGDWPLPTKLPLVGGHEGAGVVVGM[Oxidation (M)]GENVK_	8564.82	10439.5	8982.57	12450.5	9262.03
ADH2	Saccharomyces cerevisiae (strain ATCC 204508 / S288c)	Alcohol dehydrogenase 2		235	TRUE	_ATNGGAHGIINVSVSEAAIEASTR_	3881.49	640.376	730.937	678.685	791.009
ADH2	Saccharomyces cerevisiae (strain ATCC 204508 / S288c)	Alcohol dehydrogenase 2		320	TRUE	_VVGLSSLPEIYEK_	1197.31	542.61	817.507	801.167	628.91
ADH2	Saccharomyces cerevisiae (strain ATCC 204508 / S288c)	Alcohol dehydrogenase 2		9	TRUE	_AIIFYESNGK_	461.043	252.657	470.621	329.374	364.967
ADH2	Saccharomyces cerevisiae (strain ATCC 204508 / S288c)	Alcohol dehydrogenase 2		29	TRUE	_PKPNELLINVK_	265.369	212.555	257.742	253.983	262.871
ADH2	Saccharomyces cerevisiae (strain ATCC 204508 / S288c)	Alcohol dehydrogenase 2		262	TRUE	_ANGTVVLVGLPAGAK_	255.449	179.49	127.093	148.933	171.864
ADH2	Saccharomyces cerevisiae (strain ATCC 204508 / S288c)	Alcohol dehydrogenase 2		277	TRUE	_C[Carbamidomethyl (C)]SSDVFNHVVK_	27.1412			23.7187
ALB	Bos taurus	Serum albumin		347	TRUE	_DAFLGSFLYEYSR_	523.401	1126.48	848.204	1327.47	613.541
ALB	Bos taurus	Serum albumin		360	TRUE	_RHPEYAVSVLLR_	2.7023	236.149	336.774	1598.68	367.691
ALB	Bos taurus	Serum albumin		529	TRUE	_LFTFHADIC[Carbamidomethyl (C)]TLPDTEK_	73.7147	510.887	627.921	589.067	468.418
ALB	Bos taurus	Serum albumin		267	TRUE	_EC[Carbamidomethyl (C)]C[Carbamidomethyl (C)]HGDLLEC[Carbamidomethyl (C)]ADDRADLAK_	88.4885	131.68	137.97	219.4	169.356
ALB	Bos taurus	Serum albumin		45	TRUE	_GLVLIAFSQYLQQC[Carbamidomethyl (C)]PFDEHVK_	138.583	73.8324	150.917	161.556	106.84
ALB	Bos taurus	Serum albumin		184	TRUE	_YNGVFQEC[Carbamidomethyl (C)]C[Carbamidomethyl (C)]QAEDK_	18.2711	108.599	113.16	175.876	34.3182
ALB	Bos taurus	Serum albumin		45	TRUE	_GLVLIAFSQYLQQC[Carbamidomethyl (C)]PFDEHVKLVNELTEFAK_	96.6434	16.8505	0.562042	0.568588
ALB	Bos taurus	Serum albumin		66	TRUE	_LVNELTEFAK_		2611.94	3175.46	4218.31	2576.42
ALB	Bos taurus	Serum albumin		298	TRUE	_LKEC[Carbamidomethyl (C)]C[Carbamidomethyl (C)]DKPLLEK_		344.234	4149.62	1384.69	1537.62
ALB	Bos taurus	Serum albumin		35	TRUE	_FKDLGEEHFK_		1588.4	2000.86	2756.54	736.961
ALB	Bos taurus	Serum albumin		249	TRUE	_AEFVEVTK_		1452.58	1545.3	1894.07	1174.96
ALB	Bos taurus	Serum albumin		421	TRUE	_LGEYGFQNALIVR_	1350.87	1916.59	806.486	831.69	623.733
ALB	Bos taurus	Serum albumin		89	TRUE	_SLHTLFGDELC[Carbamidomethyl (C)]K_		1014.51	1053.99	1792.43	917.359
ALB	Bos taurus	Serum albumin		402	TRUE	_HLVDEPQNLIK_		729.927	897.651	1279.11	808.529
ALB	Bos taurus	Serum albumin		548	TRUE	_KQTALVELLK_		830.17	913.87	958.675	802.479
ALB	Bos taurus	Serum albumin		549	TRUE	_QTALVELLK_		700.927	875.583	1013.38	722.844
ALB	Bos taurus	Serum albumin		286	TRUE	_YIC[Carbamidomethyl (C)]DNQDTISSK_		349.814	281.883	610.224	308.287
ALB	Bos taurus	Serum albumin		469	TRUE	_M[Oxidation (M)]PC[Carbamidomethyl (C)]TEDYLSLILNR_		397.341	338.919	428.029	307.568
ALB	Bos taurus	Serum albumin		469	TRUE	_MPC[Carbamidomethyl (C)]TEDYLSLILNR_		397.341	338.919	428.029	307.568
ALB	Bos taurus	Serum albumin		139	TRUE	_LKPDPNTLC[Carbamidomethyl (C)]DEFKADEK_		221.803	353.857	494.898	329.499
ALB	Bos taurus	Serum albumin		569	TRUE	_TVM[Oxidation (M)]ENFVAFVDK_		262.197		120.635	672.661
ALB	Bos taurus	Serum albumin		569	TRUE	_TVMENFVAFVDK_		262.197		120.635	672.661
ALB	Bos taurus	Serum albumin		168	TRUE	_RHPYFYAPELLYYANK_		151.539	337.151	243.833	291.052
ALB	Bos taurus	Serum albumin		413	TRUE	_QNC[Carbamidomethyl (C)]DQFEK_		803.762	38.2018	10.9267	16.956
ALB	Bos taurus	Serum albumin		508	TRUE	_RPC[Carbamidomethyl (C)]FSALTPDETYVPK_		333.172	239.156	173.871	117.07
ALB	Bos taurus	Serum albumin		169	TRUE	_HPYFYAPELLYYANK_		60.0282	123.642	122.991	94.4494
ALB	Homo sapiens	Serum albumin;Albumin	;ALBU_HUMAN	427;427	TRUE	_FQNALLVR_	118.392	89072.6	26955	7055.84	2503.96
ALB	Homo sapiens	Serum albumin;Albumin	;ALBU_HUMAN	66;66	TRUE	_LVNEVTEFAK_	162.323	46110	15868.9	5026.68	3134.62
ALB	Homo sapiens	Serum albumin;Albumin	;ALBU_HUMAN	348;348	TRUE	_DVFLGMFLYEYAR_	7881.22	13671.8	7509.69	6038.02	5234.41
ALB	Homo sapiens	Serum albumin;Albumin	;ALBU_HUMAN	348;348	TRUE	_DVFLGM[Oxidation (M)]FLYEYAR_	7881.22	13671.8	7509.69	6038.02	5234.41
ALB	Homo sapiens	Serum albumin;Albumin	;ALBU_HUMAN	361;361	TRUE	_RHPDYSVVLLLR_	1008.78	16602	10670.8	3356.82	2404.84
ALB	Homo sapiens	Serum albumin;Albumin	;ALBU_HUMAN	599;599	TRUE	_LVAASQAALGL_	245.154	20881.5	5604.16	1869.49	908.912
ALB	Homo sapiens	Serum albumin;Albumin	;ALBU_HUMAN	550;550	TRUE	_QTALVELVK_	25.1549	18516.7	4728.95	1386.01	164.197
ALB	Homo sapiens	Serum albumin;Albumin	;ALBU_HUMAN	169;169	TRUE	_RHPYFYAPELLFFAK_	2740	3041.38	3712.68	2099.89	2268.96
ALB	Homo sapiens	Serum albumin;Albumin	;ALBU_HUMAN	397;397	TRUE	_VFDEFKPLVEEPQNLIK_	426.069	5626.75	3137.71	658.022	1318.83
ALB	Homo sapiens	Serum albumin;Albumin	;ALBU_HUMAN	525;525	TRUE	_EFNAETFTFHADIC[Carbamidomethyl (C)]TLSEKER_	1923.08	2351.48	1612.19	1567.83	1303.73
ALB	Homo sapiens	Serum albumin;Albumin	;ALBU_HUMAN	414;414	TRUE	_QNC[Carbamidomethyl (C)]ELFEQLGEYKFQNALLVR_	1396.78	2046.89	1815.55	1374.95	1268.89
ALB	Homo sapiens	Serum albumin;Albumin	;ALBU_HUMAN	509;509	TRUE	_RPC[Carbamidomethyl (C)]FSALEVDETYVPKEFNAETFTFHADIC[Carbamidomethyl (C)]TLSEK_	1739.55	1571.34	1513.23	1307.38	1108.99
ALB	Homo sapiens	Serum albumin;Albumin	;ALBU_HUMAN	376;376	TRUE	_TYETTLEK_	38.0571	4457.3	1242.43	366.474	378.244
ALB	Homo sapiens	Serum albumin;Albumin	;ALBU_HUMAN	89;89	TRUE	_SLHTLFGDKLC[Carbamidomethyl (C)]TVATLR_	704.333	955.665	792.44	2134.51	1199.2
ALB	Homo sapiens	Serum albumin;Albumin	;ALBU_HUMAN	45;45	TRUE	_ALVLIAFAQYLQQC[Carbamidomethyl (C)]PFEDHVKLVNEVTEFAK_	1200.78	922.217	1003.85	862.754	444.486
ALB	Homo sapiens	Serum albumin;Albumin	;ALBU_HUMAN	598;598	TRUE	_KLVAASQAALGL_	33.6499	3350.72	849.764	131.126	55.9114
ALB	Homo sapiens	Serum albumin;Albumin	;ALBU_HUMAN	45;45	TRUE	_ALVLIAFAQYLQQC[Carbamidomethyl (C)]PFEDHVK_	751.465	729.76	888.586	801.073	675.551
ALB	Homo sapiens	Serum albumin;Albumin	;ALBU_HUMAN	169;169	TRUE	_RHPYFYAPELLFFAKR_	505.386	447.751	642.451	619.412	532.121
ALB	Homo sapiens	Serum albumin;Albumin	;ALBU_HUMAN	509;509	TRUE	_RPC[Carbamidomethyl (C)]FSALEVDETYVPK_	94.3079	468.11	719.707	377.771	506.487
ALB	Homo sapiens	Serum albumin;Albumin	;ALBU_HUMAN	525;525	TRUE	_EFNAETFTFHADIC[Carbamidomethyl (C)]TLSEK_	604.576	421.138	426.708	299.035	242.192
ALB	Homo sapiens	Serum albumin;Albumin	;ALBU_HUMAN	170;170	TRUE	_HPYFYAPELLFFAK_	189.417	735.972	524.551	216.913	148.136
ALB	Homo sapiens	Serum albumin;Albumin	;ALBU_HUMAN	414;414	TRUE	_QNC[Carbamidomethyl (C)]ELFEQLGEYK_	76.5708	167.156	140.092	111.969	178.531
ALB	Homo sapiens	Serum albumin;Albumin	;ALBU_HUMAN	139;139	TRUE	_LVRPEVDVMC[Carbamidomethyl (C)]TAFHDNEETFLK_	66.1255	16.4915	109.716	19.837	114.049
ALB	Homo sapiens	Serum albumin;Albumin	;ALBU_HUMAN	139;139	TRUE	_LVRPEVDVM[Oxidation (M)]C[Carbamidomethyl (C)]TAFHDNEETFLK_	66.1255	16.4915	109.716	19.837	114.049
ALB	Homo sapiens	Serum albumin;Albumin	;ALBU_HUMAN	342;342	TRUE	_NYAEAKDVFLGMFLYEYAR_	46.3472	66.8008	36.9392	86.0263	65.3772
ALB	Homo sapiens	Serum albumin;Albumin	;ALBU_HUMAN	76;76	TRUE	_TC[Carbamidomethyl (C)]VADESAENC[Carbamidomethyl (C)]DKSLHTLFGDKLC[Carbamidomethyl (C)]TVATLR_	58.3295	37.063	21.7125	23.7227	80.3489
ALB	Homo sapiens	Serum albumin;Albumin	;ALBU_HUMAN	265;265	TRUE	_VHTEC[Carbamidomethyl (C)]C[Carbamidomethyl (C)]HGDLLEC[Carbamidomethyl (C)]ADDRADLAK_	47.4508	44.6202	0.562037	10.0101	115.629
ALB	Homo sapiens	Serum albumin;Albumin	;ALBU_HUMAN	469;469	TRUE	_RM[Oxidation (M)]PC[Carbamidomethyl (C)]AEDYLSVVLNQLC[Carbamidomethyl (C)]VLHEK_	23.3889	7.74538	47.349	83.3368	26.8042
ALB	Homo sapiens	Serum albumin;Albumin	;ALBU_HUMAN	170;170	TRUE	_HPYFYAPELLFFAKR_	56.8212	27.6918	23.6344	54.3984	4.4833
ALB	Homo sapiens	Serum albumin;Albumin	;ALBU_HUMAN	162;162	FALSE	_YLYEIAR_	116.289	69613.7	21074.2	7050.41	3279.49
ALB	Homo sapiens	Serum albumin;Albumin	;ALBU_HUMAN	438;438	FALSE	_KVPQVSTPTLVEVSR_	136.229	58360.6	23916.8	9999.68	5016.14
ALB	Homo sapiens	Serum albumin;Albumin	;ALBU_HUMAN	258;258	FALSE	_LVTDLTK_	52.834	26049	10058	4452.09	2660.3
ALB	Homo sapiens	Serum albumin;Albumin	;ALBU_HUMAN	250;250	TRUE	_AEFAEVSK_		16619.8	4770.36	1438.5	801.735
ALB	Homo sapiens	Serum albumin;Albumin	;ALBU_HUMAN	35;35	TRUE	_FKDLGEENFK_	23.1736	7892.19	2717.01	225.638	216.923
ALB	Homo sapiens	Serum albumin;Albumin	;ALBU_HUMAN	37;37	TRUE	_DLGEENFK_		2896.51	785.227	99.0123	174.103
ALB	Homo sapiens	Serum albumin;Albumin	;ALBU_HUMAN	131;131	TRUE	_DDNPNLPR_		3179.42	317.572	179.134	102.821
ALB	Homo sapiens	Serum albumin;Albumin	;ALBU_HUMAN	362;362	TRUE	_HPDYSVVLLLR_		1534.34	577.089	122.41	45.8803
ALB	Homo sapiens	Serum albumin;Albumin	;ALBU_HUMAN	570;570	TRUE	_AVMDDFAAFVEK_	133.694	1342.37	336.146	219.254	210.024
ALB	Homo sapiens	Serum albumin;Albumin	;ALBU_HUMAN	570;570	TRUE	_AVM[Oxidation (M)]DDFAAFVEK_	133.694	1342.37	336.146	219.254	210.024
ALB	Homo sapiens	Serum albumin;Albumin	;ALBU_HUMAN	549;549	TRUE	_KQTALVELVK_		1256.43	425.397	55.4285	44.3031
ALB	Homo sapiens	Serum albumin;Albumin	;ALBU_HUMAN	500;500	FALSE	_C[Carbamidomethyl (C)]C[Carbamidomethyl (C)]TESLVNR_		411.269	329.82	452.077	392.554
ALB	Homo sapiens	Serum albumin;Albumin	;ALBU_HUMAN	199;199	TRUE	_AAC[Carbamidomethyl (C)]LLPK_		158.582	317.398	155.874	415.708
ALB	Homo sapiens	Serum albumin;Albumin	;ALBU_HUMAN	206;206	TRUE	_LDELRDEGK_		595.628	154.45	90.6775	36.1032
ALB	Homo sapiens	Serum albumin;Albumin	;ALBU_HUMAN	139;139	TRUE	_LVRPEVDVMC[Carbamidomethyl (C)]TAFHDNEETFLKK_	141.227	139.181	31.3071	24.1217	235.427
ALB	Homo sapiens	Serum albumin;Albumin	;ALBU_HUMAN	139;139	TRUE	_LVRPEVDVM[Oxidation (M)]C[Carbamidomethyl (C)]TAFHDNEETFLKK_	141.227	139.181	31.3071	24.1217	235.427
ALB	Homo sapiens	Serum albumin;Albumin	;ALBU_HUMAN	403;403	TRUE	_PLVEEPQNLIK_		50.6974	12.7974
ALB	Homo sapiens	Serum albumin;Albumin	;ALBU_HUMAN	439;439	FALSE	_VPQVSTPTLVEVSR_		26694.7	6360.35	1835.04	718.54
ALB	Homo sapiens	Serum albumin;Albumin	;ALBU_HUMAN	161;161	TRUE	_KYLYEIAR_		572.941	220.796	93.6242
ALB	Homo sapiens	Serum albumin;Albumin	;ALBU_HUMAN	187;187	TRUE	_AAFTEC[Carbamidomethyl (C)]C[Carbamidomethyl (C)]QAADK_			48.8712	48.6271	70.6236
ALB	Homo sapiens	Serum albumin;Albumin	;ALBU_HUMAN	250;250	TRUE	_AEFAEVSKLVTDLTK_		214.614	169.488
ALB	Homo sapiens	Serum albumin;Albumin	;ALBU_HUMAN	106;106	TRUE	_ETYGEMADC[Carbamidomethyl (C)]C[Carbamidomethyl (C)]AK_			20.523		84.0226
ALB	Homo sapiens	Serum albumin;Albumin	;ALBU_HUMAN	243;243	TRUE	_LSQRFPK_		23.8731	11.4221
ZBTB42	Homo sapiens	Zinc finger and BTB domain-containing protein 42	ZBT42_HUMAN	66	TRUE	_LNGDIVTAPAFGR_		1529.89	945.906	1389.6	1341.72
ZBTB42	Homo sapiens	Zinc finger and BTB domain-containing protein 42	ZBT42_HUMAN	1	TRUE	_[Acetyl (Protein N-term)]MEFPEHGGR_		949.925	512.515	918.278	1026.68
ZBTB42	Homo sapiens	Zinc finger and BTB domain-containing protein 42	ZBT42_HUMAN	79	TRUE	_LLDFMYEGR_		578.543	183.542	642.878	575.064
ZBTB42	Homo sapiens	Zinc finger and BTB domain-containing protein 42	ZBT42_HUMAN	370	FALSE	_SFQYSHNLSR_		384.008	165.966	417.851	199.045
ZBTB42	Homo sapiens	Zinc finger and BTB domain-containing protein 42	ZBT42_HUMAN	327	TRUE	_LSPDGVAPTC[Carbamidomethyl (C)]PLC[Carbamidomethyl (C)]GK_		362.822	192.696	443.248	467.969
ZBTB42	Homo sapiens	Zinc finger and BTB domain-containing protein 42	ZBT42_HUMAN	399	FALSE	_FTQSGDLYR_		245.293	85.0605	259.315	272.905
ZBTB42	Homo sapiens	Zinc finger and BTB domain-containing protein 42	ZBT42_HUMAN	281	TRUE	_LASEDELGPGGPLC[Carbamidomethyl (C)]IC[Carbamidomethyl (C)]PLC[Carbamidomethyl (C)]SK_		208.474	190.394	136.045	263.511
ZBTB42	Homo sapiens	Zinc finger and BTB domain-containing protein 42	ZBT42_HUMAN	92	TRUE	_SLPVEDVLAAASYLHMYDIVK_		82.4392	179.775	65.6611	126.144
ZBTB42	Homo sapiens	Zinc finger and BTB domain-containing protein 42	ZBT42_HUMAN	273	TRUE	_ELELGAGR_		418.684		304.272	572.55
ZBTB42	Homo sapiens	Zinc finger and BTB domain-containing protein 42	ZBT42_HUMAN	256	TRUE	_GLVVGLQPLPLSGEGSR_		423.929	152.513	279.886	316.945
ZBTB42	Homo sapiens	Zinc finger and BTB domain-containing protein 42	ZBT42_HUMAN	201	TRUE	_VHPPC[Carbamidomethyl (C)]VLQTPLC[Carbamidomethyl (C)]SQR_		448.746	173.104		284.853
ZBTB42	Homo sapiens	Zinc finger and BTB domain-containing protein 42	ZBT42_HUMAN	256	TRUE	_GLVVGLQPLPLSGEGSRELELGAGR_		136.117	308.427	113.047
ZNF814	Homo sapiens	Zinc finger protein 814	ZN814_HUMAN	780	TRUE	_SFAESSSFTK_				352.359	348.55
GPR89A;GPR89B	Homo sapiens	Golgi pH regulator A;Golgi pH regulator B	GPHRA_HUMAN;GPHRB_HUMAN	180;180	TRUE	_NVTDTDILALERR_		1790.16	1591.08	2395.32	1136.91
GPR89A;GPR89B	Homo sapiens	Golgi pH regulator A;Golgi pH regulator B	GPHRA_HUMAN;GPHRB_HUMAN	400;400	TRUE	_MSMPLEYR_		1119.45	1045.21	1635.46	753.721
GPR89A;GPR89B	Homo sapiens	Golgi pH regulator A;Golgi pH regulator B	GPHRA_HUMAN;GPHRB_HUMAN	193;193	TRUE	_LLQTMDMIISK_		1018.58	901.076	1498.44	989.41
GPR89A;GPR89B	Homo sapiens	Golgi pH regulator A;Golgi pH regulator B	GPHRA_HUMAN;GPHRB_HUMAN	260;260	TRUE	_QLFLETADLYATK_		1262.81	1043.4	1145.44	912.534
GPR89A;GPR89B	Homo sapiens	Golgi pH regulator A;Golgi pH regulator B	GPHRA_HUMAN;GPHRB_HUMAN	218;218	TRUE	_GEVHNKPSGFWGMIK_		605.015	941.287	1610.5	975.109
GPR89A;GPR89B	Homo sapiens	Golgi pH regulator A;Golgi pH regulator B	GPHRA_HUMAN;GPHRB_HUMAN	138;138	TRUE	_HGILSIEQLISR_		292.696	372.095	765.768	415.239
GPR89A;GPR89B	Homo sapiens	Golgi pH regulator A;Golgi pH regulator B	GPHRA_HUMAN;GPHRB_HUMAN	192;192	TRUE	_RLLQTMDMIISK_		229.488	364.999	667.959	343.758
GPR89A;GPR89B	Homo sapiens	Golgi pH regulator A;Golgi pH regulator B	GPHRA_HUMAN;GPHRB_HUMAN	127;127	TRUE	_LGDPFPILSPK_		219.525	376.124	527.874	174.485
GPR89A;GPR89B	Homo sapiens	Golgi pH regulator A;Golgi pH regulator B	GPHRA_HUMAN;GPHRB_HUMAN	180;180	TRUE	_NVTDTDILALER_		238.099	333.371	414.053	256.59
GPR89A;GPR89B	Homo sapiens	Golgi pH regulator A;Golgi pH regulator B	GPHRA_HUMAN;GPHRB_HUMAN	233;233	TRUE	_SVTTSASGSENLTLIQQEVDALEELSR_		205.094	209.01	277.878	243.425
WASH3P;WASH2P	Homo sapiens	Putative WAS protein family homolog 3;WAS protein family homolog 2	WASH3_HUMAN;WASH2_HUMAN	361;363	TRUE	_ATLLESIR_		354.922	377.616	553.469	319.237
WASH3P;WASH2P	Homo sapiens	Putative WAS protein family homolog 3;WAS protein family homolog 2	WASH3_HUMAN;WASH2_HUMAN	184;186	FALSE	_YVFLDPLAGAVTK_		201.232	158.507	137.144	78.3708
AJM1	Homo sapiens	Apical junction component 1 homolog	AJM1_HUMAN	251	TRUE	_AFYC[Carbamidomethyl (C)]DGPLPGPR_		150.938	94.8213	255.706	122.472
TRIM49D1	Homo sapiens	Tripartite motif-containing protein 49D	TR49D_HUMAN	287	TRUE	_VDITLPHNEANSHIFR_		543.822	629.349	971.396	793.707
TRIM49D1	Homo sapiens	Tripartite motif-containing protein 49D	TR49D_HUMAN	272	FALSE	_AGPITGLR_		782.153	470.839	792.693	573.946
TRIM49D1	Homo sapiens	Tripartite motif-containing protein 49D	TR49D_HUMAN	364	TRUE	_GTNQNGNIHGEEGLFSLGC[Carbamidomethyl (C)]VK_		197.917	88.9644	215.317	236.799
TRIM49D1	Homo sapiens	Tripartite motif-containing protein 49D	TR49D_HUMAN	316	TRUE	_QNAPHITATPTSFLAWGAQTFTSGK_		148.462	183.405	190.615	162.447
TRIM49D1	Homo sapiens	Tripartite motif-containing protein 49D	TR49D_HUMAN	109	TRUE	_SLLC[Carbamidomethyl (C)]LLC[Carbamidomethyl (C)]SSSLEHR_		82.4217	104.639	171.729	111.809
TRIM49D1	Homo sapiens	Tripartite motif-containing protein 49D	TR49D_HUMAN	255	TRUE	_SESVLLHMPQPLNLELR_		60.4774	93.9064	112.075	173.798
TRIM49D1	Homo sapiens	Tripartite motif-containing protein 49D	TR49D_HUMAN	126	TRUE	_HC[Carbamidomethyl (C)]PAEWAAEEHREK_		4.48952	10.7464	40.6613	61.8025
TRIM49D1	Homo sapiens	Tripartite motif-containing protein 49D	TR49D_HUMAN	186	FALSE	_MPAFHHEEEKHNLEMLK_			25.021	152.705	90.4575
TRIM49D1	Homo sapiens	Tripartite motif-containing protein 49D	TR49D_HUMAN	228	TRUE	_GTYAELMK_		113.648
TMEM238	Homo sapiens	Transmembrane protein 238	TM238_HUMAN	104	TRUE	_DYGLRPSALAR_		3016.62	2632.48	4521.49	1549.79
TMEM238	Homo sapiens	Transmembrane protein 238	TM238_HUMAN	146	TRUE	_APPPPAAGSR_		284.859	319.276	609.365	330.004
TMEM238	Homo sapiens	Transmembrane protein 238	TM238_HUMAN	159	TRUE	_LQLATLEAGPGAAGAGSE_		418.492	354.581	428.878	160.773
MCRIP1	Homo sapiens	Mapk-regulated corepressor-interacting protein 1	MCRI1_HUMAN	39	TRUE	_FIYEAWQGVER_		790.416	328.637	1155.27	494.787
MCRIP1	Homo sapiens	Mapk-regulated corepressor-interacting protein 1	MCRI1_HUMAN	21	TRUE	_SPPSSSEIFTPAHEENVR_		497.342	214.346	411.462	200.893
MCRIP1	Homo sapiens	Mapk-regulated corepressor-interacting protein 1	MCRI1_HUMAN	61	TRUE	_GLVEEYVEKVPNPSLK_		238.897	100.626	225.4	72.8713
MCRIP1	Homo sapiens	Mapk-regulated corepressor-interacting protein 1	MCRI1_HUMAN	77	TRUE	_TFKPIDLSDLKR_		682.595	476.312	373.11
CSN1S1	Bos taurus	Alpha-S1-casein		23	TRUE	_HQGLPQEVLNENLLR_		1.28154e+06	1650044	1.33913e+06	1.47935e+06
CSN1S1	Bos taurus	Alpha-S1-casein		38	TRUE	_FFVAPFPEVFGK_	429.379	934842	1.79788e+06	1101192	1232140
CSN1S1	Bos taurus	Alpha-S1-casein		106	TRUE	_YLGYLEQLLR_	125.422	442081	811938	503977	517755
CSN1S1	Bos taurus	Alpha-S1-casein		95	TRUE	_HIQKEDVPSER_		462106	541938	608956	464859
CSN1S1	Bos taurus	Alpha-S1-casein		19	TRUE	_HPIKHQGLPQEVLNENLLR_		269335	601738	559756	372960
CSN1S1	Bos taurus	Alpha-S1-casein		140	TRUE	_EGIHAQQKEPM[Oxidation (M)]IGVNQELAYFYPELFR_		106064	303772	259018	244056
CSN1S1	Bos taurus	Alpha-S1-casein		140	TRUE	_EGIHAQQKEPMIGVNQELAYFYPELFR_		106064	303772	259018	244056
CSN1S1	Bos taurus	Alpha-S1-casein		38	TRUE	_FFVAPFPEVFGKEK_		103880	227298	130633	67751.9
CSN1S1	Bos taurus	Alpha-S1-casein		148	TRUE	_EPM[Oxidation (M)]IGVNQELAYFYPELFR_		57485.4	111141	99980.7	103629
CSN1S1	Bos taurus	Alpha-S1-casein		148	TRUE	_EPMIGVNQELAYFYPELFR_		57485.4	111141	99980.7	103629
CSN1S1	Bos taurus	Alpha-S1-casein		119	TRUE	_YKVPQLEIVPNSAEER_		57875.8	77963.9	62756.7	57926.6
CSN1S1	Bos taurus	Alpha-S1-casein		99	TRUE	_EDVPSER_		36943.6	39592.6	40824.8	43534.3
CSN1S1	Bos taurus	Alpha-S1-casein		121	TRUE	_VPQLEIVPNSAEER_		13021.9	18250.5	16275.2	14067.9
CSN1S1	Bos taurus	Alpha-S1-casein		50	TRUE	_EKVNELSK_		12514.7	14134.4	17356.7	17236.8
CSN1S1	Bos taurus	Alpha-S1-casein		135	TRUE	_LHSM[Oxidation (M)]KEGIHAQQKEPM[Oxidation (M)]IGVNQELAYFYPELFR_	6.59925	3303.26	29560.1	12724.1	8774.6
CSN1S1	Bos taurus	Alpha-S1-casein		135	TRUE	_LHSMKEGIHAQQKEPMIGVNQELAYFYPELFR_	6.59925	3303.26	29560.1	12724.1	8774.6
CSN1S1	Bos taurus	Alpha-S1-casein		135	TRUE	_LHSMKEGIHAQQKEPM[Oxidation (M)]IGVNQELAYFYPELFR_	6.59925	3303.26	29560.1	12724.1	8774.6
CSN1S1	Bos taurus	Alpha-S1-casein		135	TRUE	_LHSM[Oxidation (M)]KEGIHAQQKEPMIGVNQELAYFYPELFR_	6.59925	3303.26	29560.1	12724.1	8774.6
CSN1S1	Bos taurus	Alpha-S1-casein		118	TRUE	_KYKVPQLEIVPNSAEER_		3851.42	6990.98	5515.72	3395.16
CSN1S1	Bos taurus	Alpha-S1-casein		135	TRUE	_LHSMKEGIHAQQK_		950.346	1561.88	1324.16	343.733
CSN1S1	Bos taurus	Alpha-S1-casein		167	TRUE	_QFYQLDAYPSGAWYYVPLGTQYTDAPSFSDIPNPIGSENSEK_		242.551	439.751	544.758	340.142
CSN1S2	Bos taurus	Alpha-S2-casein		189	TRUE	_FALPQYLK_		1.06957e+06	1.34041e+06	1.17635e+06	819296
CSN1S2	Bos taurus	Alpha-S2-casein		130	TRUE	_NAVPITPTLNR_		390784	423222	459519	579736
CSN1S2	Bos taurus	Alpha-S2-casein		96	TRUE	_ALNEINQFYQK_		407678	484920	389284	335282
CSN1S2	Bos taurus	Alpha-S2-casein		40	TRUE	_NMAINPSKENLC[Carbamidomethyl (C)]STFC[Carbamidomethyl (C)]K_		169392	239218	189138	141503
CSN1S2	Bos taurus	Alpha-S2-casein		40	TRUE	_NM[Oxidation (M)]AINPSKENLC[Carbamidomethyl (C)]STFC[Carbamidomethyl (C)]K_		169392	239218	189138	141503
CSN1S2	Bos taurus	Alpha-S2-casein		168	TRUE	_LTEEEKNRLNFLK_		85832	152229	113640	57303.6
CSN1S2	Bos taurus	Alpha-S2-casein		107	TRUE	_FPQYLQYLYQGPIVLNPWDQVK_	228.34	27215	62979.3	71383	58607.8
CSN1S2	Bos taurus	Alpha-S2-casein		86	TRUE	_ITVDDKHYQK_		49756.3	55049.1	56947.8	50547
CSN1S2	Bos taurus	Alpha-S2-casein		204	TRUE	_AMKPWIQPK_		41041.5	58661.6	53506.7	39781.7
CSN1S2	Bos taurus	Alpha-S2-casein		204	TRUE	_AM[Oxidation (M)]KPWIQPK_		41041.5	58661.6	53506.7	39781.7
CSN1S2	Bos taurus	Alpha-S2-casein		40	TRUE	_NMAINPSK_		32741.4	37333.9	38542.7	37084.1
CSN1S2	Bos taurus	Alpha-S2-casein		40	TRUE	_NM[Oxidation (M)]AINPSK_		32741.4	37333.9	38542.7	37084.1
CSN1S2	Bos taurus	Alpha-S2-casein		129	TRUE	_RNAVPITPTLNR_		27448.4	30196.8	30705.7	33605.6
CSN1S2	Bos taurus	Alpha-S2-casein		48	TRUE	_ENLC[Carbamidomethyl (C)]STFC[Carbamidomethyl (C)]K_		26555.4	27445.7	27172.5	31406.2
CSN1S2	Bos taurus	Alpha-S2-casein		213	TRUE	_TKVIPYVR_		16663.7	28905.7	20927.9	7815.72
CSN1S2	Bos taurus	Alpha-S2-casein		166	TRUE	_TKLTEEEKNR_		6727.73	7095.55	6533.83	4198.46
CSN1S2	Bos taurus	Alpha-S2-casein		153	TRUE	_TVDMESTEVFTK_		2306.39	2398.29	2808.03	2844.31
CSN1S2	Bos taurus	Alpha-S2-casein		153	TRUE	_TVDM[Oxidation (M)]ESTEVFTK_		2306.39	2398.29	2808.03	2844.31
CSN1S2	Bos taurus	Alpha-S2-casein		40	TRUE	_NMAINPSKENLC[Carbamidomethyl (C)]STFC[Carbamidomethyl (C)]KEVVR_		2817.26	2409.03	3009.14	1201.64
CSN1S2	Bos taurus	Alpha-S2-casein		40	TRUE	_NM[Oxidation (M)]AINPSKENLC[Carbamidomethyl (C)]STFC[Carbamidomethyl (C)]KEVVR_		2817.26	2409.03	3009.14	1201.64
CSN1S2	Bos taurus	Alpha-S2-casein		107	TRUE	_FPQYLQYLYQGPIVLNPWDQVKR_		87.8484	159.247	232.294	4697.59
CSN1S2	Bos taurus	Alpha-S2-casein		153	TRUE	_TVDMESTEVFTKK_		1109.82	1327.12	1352.41	936.073
CSN1S2	Bos taurus	Alpha-S2-casein		153	TRUE	_TVDM[Oxidation (M)]ESTEVFTKK_		1109.82	1327.12	1352.41	936.073
CSN1S2	Bos taurus	Alpha-S2-casein		130	TRUE	_NAVPITPTLNREQLSTSEENSK_		886.055	2023.7	1286.1	372.525
CSN1S2	Bos taurus	Alpha-S2-casein		130	TRUE	_NAVPITPTLNREQLSTSEENSKK_		667.488	1337.35	953.057	307.411
CSN1S2	Bos taurus	Alpha-S2-casein		168	TRUE	_LTEEEKNR_		133.718	1021.37	414.296	767.654
CSN1S2	Bos taurus	Alpha-S2-casein		174	TRUE	_NRLNFLK_		481.409	659.114	443.765	247.844
CSN1S2	Bos taurus	Alpha-S2-casein		141	TRUE	_EQLSTSEENSKK_		161.392	200.4	285.543	207.861
CSN1S2	Bos taurus	Alpha-S2-casein		141	TRUE	_EQLSTSEENSK_		196.144	178.995	176.155	160.957
CSN1S2	Bos taurus	Alpha-S2-casein		166	TRUE	_TKLTEEEK_		131.601	194.366	66.2264	246.231
CSN1S2	Bos taurus	Alpha-S2-casein		48	TRUE	_ENLC[Carbamidomethyl (C)]STFC[Carbamidomethyl (C)]KEVVR_		253.295	519.194	372.714
CSN2	Bos taurus	Beta-casein		185	TRUE	_VLPVPQK_		188425	226568	186314	158273
CSN2	Bos taurus	Beta-casein		192	TRUE	_AVPYPQR_		174248	217246	199384	146568
CSN2	Bos taurus	Beta-casein		218	TRUE	_GPFPIIV_		158732	198633	193351	162240
CSN2	Bos taurus	Beta-casein		199	TRUE	_DM[Oxidation (M)]PIQAFLLYQEPVLGPVR_		72087.6	109922	85271.8	80525.2
CSN2	Bos taurus	Beta-casein		199	TRUE	_DMPIQAFLLYQEPVLGPVR_		72087.6	109922	85271.8	80525.2
CSN2	Bos taurus	Beta-casein		113	TRUE	_VKEAMAPK_		680.446	1105.66	943.259	525.8
CSN2	Bos taurus	Beta-casein		121	TRUE	_HKEMPFPK_		399.711	708.936	866.549	560.071
CSN2	Bos taurus	Beta-casein		185	TRUE	_VLPVPQKAVPYPQR_		236.225	336.335	313.426	155.264
CSN2	Bos taurus	Beta-casein		199	TRUE	_DMPIQAFLLYQEPVLGPVRGPFPIIV_		443.017	1175.05	1201.52	151.923
CSN2	Bos taurus	Beta-casein		199	TRUE	_DM[Oxidation (M)]PIQAFLLYQEPVLGPVRGPFPIIV_		443.017	1175.05	1201.52	151.923
ZNF587B	Homo sapiens	Zinc finger protein 587B	Z587B_HUMAN	183	FALSE	_SGLLQQEASHTGEK_		484.77		353.661	466.281
ZNF587B	Homo sapiens	Zinc finger protein 587B	Z587B_HUMAN	334	TRUE	_SFSSNVNLK_			151.31	190.155	310.036
ZNF587B	Homo sapiens	Zinc finger protein 587B	Z587B_HUMAN	150	TRUE	_GSVEEALFVKR_			42.3766	155.772	121.509
ZNF587B	Homo sapiens	Zinc finger protein 587B	Z587B_HUMAN	150	TRUE	_GSVEEALFVK_				22.2304	44.1062
NACA	Homo sapiens	Nascent polypeptide-associated complex subunit alpha, muscle-specific form	NACAM_HUMAN	1977	FALSE	_SPASDTYIVFGEAK_		1440.91	1241.68	17206.2	675.275
NACA	Homo sapiens	Nascent polypeptide-associated complex subunit alpha, muscle-specific form	NACAM_HUMAN	1991	FALSE	_IEDLSQQAQLAAAEK_	36.0315	1250.42	1171.4	13653	924.998
NACA	Homo sapiens	Nascent polypeptide-associated complex subunit alpha, muscle-specific form	NACAM_HUMAN	1964	FALSE	_NILFVITKPDVYK_		1185.16	950.1	11070.4	558.546
NACA	Homo sapiens	Nascent polypeptide-associated complex subunit alpha, muscle-specific form	NACAM_HUMAN	2043	FALSE	_DIELVMSQANVSR_		357.255	225.673	1689.23	150.582
NACA	Homo sapiens	Nascent polypeptide-associated complex subunit alpha, muscle-specific form	NACAM_HUMAN	1358	TRUE	_GGPTTPSSK_		0.560984
NACA	Homo sapiens	Nascent polypeptide-associated complex subunit alpha, muscle-specific form	NACAM_HUMAN	1962	FALSE	_SKNILFVITKPDVYK_		1.99305	103.471	2314.75
NACA	Homo sapiens	Nascent polypeptide-associated complex subunit alpha, muscle-specific form	NACAM_HUMAN	2061	FALSE	_ALKNNSNDIVNAIMELTM[Oxidation (M)]_			5.33159	79.1636
NACA	Homo sapiens	Nascent polypeptide-associated complex subunit alpha, muscle-specific form	NACAM_HUMAN	1991	FALSE	_IEDLSQQAQLAAAEKFK_				169.114
C11orf98	Homo sapiens	Uncharacterized protein C11orf98	CK098_HUMAN	36	TRUE	_VVGAVIDQGLITR_		34718.8	10872	38892.4	19263.1
C11orf98	Homo sapiens	Uncharacterized protein C11orf98	CK098_HUMAN	84	TRUE	_TAMEVEAPSKPAR_		11304.1	4916.74	13621.9	7282.21
C11orf98	Homo sapiens	Uncharacterized protein C11orf98	CK098_HUMAN	84	TRUE	_TAM[Oxidation (M)]EVEAPSKPAR_		11304.1	4916.74	13621.9	7282.21
C11orf98	Homo sapiens	Uncharacterized protein C11orf98	CK098_HUMAN	60	TRUE	_ANITLSGK_		7780.44	3474.09	8997.9	4503.97
C11orf98	Homo sapiens	Uncharacterized protein C11orf98	CK098_HUMAN	110	TRUE	_APQDVEMKDLEDES_		4301.82	2166.7	5231.46	4062.95
C11orf98	Homo sapiens	Uncharacterized protein C11orf98	CK098_HUMAN	110	TRUE	_APQDVEM[Oxidation (M)]KDLEDES_		4301.82	2166.7	5231.46	4062.95
C11orf98	Homo sapiens	Uncharacterized protein C11orf98	CK098_HUMAN	34	TRUE	_HRVVGAVIDQGLITR_		1632.42	723.14	3865.35	1021.49
C11orf98	Homo sapiens	Uncharacterized protein C11orf98	CK098_HUMAN	108	TRUE	_TKAPQDVEMKDLEDES_		1535.88	980.677	1942.76	1227.2
C11orf98	Homo sapiens	Uncharacterized protein C11orf98	CK098_HUMAN	97	TRUE	_TSEPQLK_		535.739	207.485	670.251	496.418
C11orf98	Homo sapiens	Uncharacterized protein C11orf98	CK098_HUMAN	71	TRUE	_KLLQQIR_		368.569	118.71	651.35	306.847
C11orf98	Homo sapiens	Uncharacterized protein C11orf98	CK098_HUMAN	82	TRUE	_EKTAM[Oxidation (M)]EVEAPSKPAR_		252.187	50.7931	262.728	131.052
C11orf98	Homo sapiens	Uncharacterized protein C11orf98	CK098_HUMAN	60	TRUE	_ANITLSGKK_		203.129	100.137	191.661	74.4148
C11orf98	Homo sapiens	Uncharacterized protein C11orf98	CK098_HUMAN	97	TRUE	_TSEPQLKR_		128.386	86.5188	183.362	65.9937
CNK3/IPCEF1;CNKSR3	Homo sapiens	CNK3/IPCEF1 fusion protein;Connector enhancer of kinase suppressor of ras 3	CNIPF_HUMAN;CNKR3_HUMAN	229;229	FALSE	_STYDGLHVITGTTENSPADR_		237.765	243.763	526.857	350.901
CNK3/IPCEF1;CNKSR3	Homo sapiens	CNK3/IPCEF1 fusion protein;Connector enhancer of kinase suppressor of ras 3	CNIPF_HUMAN;CNKR3_HUMAN	133;133	TRUE	_ALLAWLDR_		164.627		192.625	78.7965
CNK3/IPCEF1;CNKSR3	Homo sapiens	CNK3/IPCEF1 fusion protein;Connector enhancer of kinase suppressor of ras 3	CNIPF_HUMAN;CNKR3_HUMAN	280;280	TRUE	_ENPTGVVLLLK_			11.68	12.4236	18.375
KRT10	Homo sapiens	Keratin, type I cytoskeletal 10;Keratin, type I cytoskeletal 10	;K1C10_HUMAN	166;166	TRUE	_ALEESNYELEGK_	66.116	217777	545614	349619	221905
KRT10	Homo sapiens	Keratin, type I cytoskeletal 10;Keratin, type I cytoskeletal 10	;K1C10_HUMAN	258;258	TRUE	_VLDELTLTK_	7.93494	219863	506673	331489	252769
KRT10	Homo sapiens	Keratin, type I cytoskeletal 10;Keratin, type I cytoskeletal 10	;K1C10_HUMAN	296;296	TRUE	_NVSTGDVNVEMNAAPGVDLTQLLNNMR_	4244.62	169750	336436	206308	147086
KRT10	Homo sapiens	Keratin, type I cytoskeletal 10;Keratin, type I cytoskeletal 10	;K1C10_HUMAN	296;296	TRUE	_NVSTGDVNVEM[Oxidation (M)]NAAPGVDLTQLLNNMR_	4244.62	169750	336436	206308	147086
KRT10	Homo sapiens	Keratin, type I cytoskeletal 10;Keratin, type I cytoskeletal 10	;K1C10_HUMAN	296;296	TRUE	_NVSTGDVNVEM[Oxidation (M)]NAAPGVDLTQLLNNM[Oxidation (M)]R_	4244.62	169750	336436	206308	147086
KRT10	Homo sapiens	Keratin, type I cytoskeletal 10;Keratin, type I cytoskeletal 10	;K1C10_HUMAN	296;296	TRUE	_NVSTGDVNVEMNAAPGVDLTQLLNNM[Oxidation (M)]R_	4244.62	169750	336436	206308	147086
KRT10	Homo sapiens	Keratin, type I cytoskeletal 10;Keratin, type I cytoskeletal 10	;K1C10_HUMAN	41;41	TRUE	_GSLGGGFSSGGFSGGSFSR_	2663.92	122561	372429	201400	127310
KRT10	Homo sapiens	Keratin, type I cytoskeletal 10;Keratin, type I cytoskeletal 10	;K1C10_HUMAN	344;344	TRUE	_SKELTTEIDNNIEQISSYK_	61.9283	62602.8	144566	64714.1	59640.7
KRT10	Homo sapiens	Keratin, type I cytoskeletal 10;Keratin, type I cytoskeletal 10	;K1C10_HUMAN	371;371	TRUE	_NVQALEIELQSQLALK_	3374.63	32419.8	85292	50312	41893.5
KRT10	Homo sapiens	Keratin, type I cytoskeletal 10;Keratin, type I cytoskeletal 10	;K1C10_HUMAN	208;208	TRUE	_NQILNLTTDNANILLQIDNAR_	1332.41	21230	51229.9	35573.8	38907.3
KRT10	Homo sapiens	Keratin, type I cytoskeletal 10;Keratin, type I cytoskeletal 10	;K1C10_HUMAN	60;60	TRUE	_GSSGGGC[Carbamidomethyl (C)]FGGSSGGYGGLGGFGGGSFR_	546.728	7589.7	39681	6794.6	8903.62
KRT10	Homo sapiens	Keratin, type I cytoskeletal 10;Keratin, type I cytoskeletal 10	;K1C10_HUMAN	423;423	TRUE	_AETEC[Carbamidomethyl (C)]QNTEYQQLLDIK_	97.9808	5078.19	28231.4	4211.7	6466.29
KRT10	Homo sapiens	Keratin, type I cytoskeletal 10;Keratin, type I cytoskeletal 10	;K1C10_HUMAN	36;36	TRUE	_ISSSKGSLGGGFSSGGFSGGSFSR_	127.659	9550.01	12386.2	9118.85	5941.65
KRT10	Homo sapiens	Keratin, type I cytoskeletal 10;Keratin, type I cytoskeletal 10	;K1C10_HUMAN	346;346	TRUE	_ELTTEIDNNIEQISSYK_	10.0558	4255.07	17136.4	4959.71	6217.44
KRT10	Homo sapiens	Keratin, type I cytoskeletal 10;Keratin, type I cytoskeletal 10	;K1C10_HUMAN	344;344	TRUE	_SKELTTEIDNNIEQISSYKSEITELR_	34.4404	3358.57	11383.4	4528.77	2865.71
KRT10	Homo sapiens	Keratin, type I cytoskeletal 10;Keratin, type I cytoskeletal 10	;K1C10_HUMAN	370;370	TRUE	_RNVQALEIELQSQLALK_	230.323	1584.75	7821.12	4347.78	2796.77
KRT10	Homo sapiens	Keratin, type I cytoskeletal 10;Keratin, type I cytoskeletal 10	;K1C10_HUMAN	346;346	TRUE	_ELTTEIDNNIEQISSYKSEITELR_	51.7152	2316.29	6308.89	2635.32	1559.59
KRT10	Homo sapiens	Keratin, type I cytoskeletal 10;Keratin, type I cytoskeletal 10	;K1C10_HUMAN	400;400	TRUE	_YC[Carbamidomethyl (C)]VQLSQIQAQISALEEQLQQIR_	34.1939	332.715	2287.01	759.16	1377.55
KRT10	Homo sapiens	Keratin, type I cytoskeletal 10;Keratin, type I cytoskeletal 10	;K1C10_HUMAN	335;335	FALSE	_DAEAWFNEK_		247790	535662	341082	218305
KRT10	Homo sapiens	Keratin, type I cytoskeletal 10;Keratin, type I cytoskeletal 10	;K1C10_HUMAN	440;440	TRUE	_IRLENEIQTYR_	78.766	199866	569914	318424	189366
KRT10	Homo sapiens	Keratin, type I cytoskeletal 10;Keratin, type I cytoskeletal 10	;K1C10_HUMAN	323;323	TRUE	_SQYEQLAEQNRK_		227643	434918	310040	198937
KRT10	Homo sapiens	Keratin, type I cytoskeletal 10;Keratin, type I cytoskeletal 10	;K1C10_HUMAN	236;236	TRUE	_LKYENEVALR_	12.4537	170711	356746	234943	166252
KRT10	Homo sapiens	Keratin, type I cytoskeletal 10;Keratin, type I cytoskeletal 10	;K1C10_HUMAN	442;442	TRUE	_LENEIQTYR_		57893.5	122220	76808.1	60586.5
KRT10	Homo sapiens	Keratin, type I cytoskeletal 10;Keratin, type I cytoskeletal 10	;K1C10_HUMAN	387;387	TRUE	_QSLEASLAETEGR_	71.0814	44574.6	119686	58089.9	60623.9
KRT10	Homo sapiens	Keratin, type I cytoskeletal 10;Keratin, type I cytoskeletal 10	;K1C10_HUMAN	323;323	TRUE	_SQYEQLAEQNRKDAEAWFNEK_		86317.4	104487	54998.9	20857.9
KRT10	Homo sapiens	Keratin, type I cytoskeletal 10;Keratin, type I cytoskeletal 10	;K1C10_HUMAN	238;238	TRUE	_YENEVALR_		50679.4	96303.1	63897.8	47354.4
KRT10	Homo sapiens	Keratin, type I cytoskeletal 10;Keratin, type I cytoskeletal 10	;K1C10_HUMAN	286;286	TRUE	_NHEEEMKDLR_		43586.1	95899	63259.9	38706.2
KRT10	Homo sapiens	Keratin, type I cytoskeletal 10;Keratin, type I cytoskeletal 10	;K1C10_HUMAN	286;286	TRUE	_NHEEEM[Oxidation (M)]KDLR_		43586.1	95899	63259.9	38706.2
KRT10	Homo sapiens	Keratin, type I cytoskeletal 10;Keratin, type I cytoskeletal 10	;K1C10_HUMAN	323;323	TRUE	_SQYEQLAEQNR_		45780.8	72916.5	60018.2	56636.6
KRT10	Homo sapiens	Keratin, type I cytoskeletal 10;Keratin, type I cytoskeletal 10	;K1C10_HUMAN	334;334	FALSE	_KDAEAWFNEK_		36686.6	77158.7	50094.4	37361.9
KRT10	Homo sapiens	Keratin, type I cytoskeletal 10;Keratin, type I cytoskeletal 10	;K1C10_HUMAN	178;178	TRUE	_IKEWYEK_		25831.6	75451.8	44618.2	31479.4
KRT10	Homo sapiens	Keratin, type I cytoskeletal 10;Keratin, type I cytoskeletal 10	;K1C10_HUMAN	267;267	TRUE	_ADLEMQIESLTEELAYLKK_	1243.86	14052.6	63080.3	32449.2	31539.7
KRT10	Homo sapiens	Keratin, type I cytoskeletal 10;Keratin, type I cytoskeletal 10	;K1C10_HUMAN	267;267	TRUE	_ADLEM[Oxidation (M)]QIESLTEELAYLKK_	1243.86	14052.6	63080.3	32449.2	31539.7
KRT10	Homo sapiens	Keratin, type I cytoskeletal 10;Keratin, type I cytoskeletal 10	;K1C10_HUMAN	346;346	TRUE	_ELTTEIDNNIEQISSYKSEITELRR_	243.702	22517.4	45856.9	19869.9	11494
KRT10	Homo sapiens	Keratin, type I cytoskeletal 10;Keratin, type I cytoskeletal 10	;K1C10_HUMAN	257;257	TRUE	_RVLDELTLTK_		14385	38970.8	22809.4	18821.6
KRT10	Homo sapiens	Keratin, type I cytoskeletal 10;Keratin, type I cytoskeletal 10	;K1C10_HUMAN	202;202	TRUE	_TIDDLKNQILNLTTDNANILLQIDNAR_	175.575	7041.88	24381.2	15574.8	11427.7
KRT10	Homo sapiens	Keratin, type I cytoskeletal 10;Keratin, type I cytoskeletal 10	;K1C10_HUMAN	363;363	TRUE	_SEITELR_		7982.33	21734.5	13290.8	14115
KRT10	Homo sapiens	Keratin, type I cytoskeletal 10;Keratin, type I cytoskeletal 10	;K1C10_HUMAN	166;166	TRUE	_ALEESNYELEGKIKEWYEK_		16565.9	18036.6	9672.02	2952.53
KRT10	Homo sapiens	Keratin, type I cytoskeletal 10;Keratin, type I cytoskeletal 10	;K1C10_HUMAN	267;267	TRUE	_ADLEMQIESLTEELAYLK_	341.094	3637.55	12791.3	6908.15	8338.53
KRT10	Homo sapiens	Keratin, type I cytoskeletal 10;Keratin, type I cytoskeletal 10	;K1C10_HUMAN	267;267	TRUE	_ADLEM[Oxidation (M)]QIESLTEELAYLK_	341.094	3637.55	12791.3	6908.15	8338.53
KRT10	Homo sapiens	Keratin, type I cytoskeletal 10;Keratin, type I cytoskeletal 10	;K1C10_HUMAN	195;195	TRUE	_DYSKYYK_		8288.79	7476.04	5520.65	1025.5
KRT10	Homo sapiens	Keratin, type I cytoskeletal 10;Keratin, type I cytoskeletal 10	;K1C10_HUMAN	363;363	TRUE	_SEITELRR_		3276.35	8653.92	5044.25	3444.88
KRT10	Homo sapiens	Keratin, type I cytoskeletal 10;Keratin, type I cytoskeletal 10	;K1C10_HUMAN	229;229	TRUE	_LAADDFRLKYENEVALR_	13.0574	8712.28	5363.41	3146.19	1414.87
KRT10	Homo sapiens	Keratin, type I cytoskeletal 10;Keratin, type I cytoskeletal 10	;K1C10_HUMAN	258;258	TRUE	_VLDELTLTKADLEMQIESLTEELAYLKK_	63.3479	1532.09	7413.66	4547.55	1879.32
KRT10	Homo sapiens	Keratin, type I cytoskeletal 10;Keratin, type I cytoskeletal 10	;K1C10_HUMAN	258;258	TRUE	_VLDELTLTKADLEM[Oxidation (M)]QIESLTEELAYLKK_	63.3479	1532.09	7413.66	4547.55	1879.32
KRT10	Homo sapiens	Keratin, type I cytoskeletal 10;Keratin, type I cytoskeletal 10	;K1C10_HUMAN	238;238	TRUE	_YENEVALRQSVEADINGLRR_		6561.41	4384.53	1934.66	580.073
KRT10	Homo sapiens	Keratin, type I cytoskeletal 10;Keratin, type I cytoskeletal 10	;K1C10_HUMAN	285;285	TRUE	_KNHEEEMKDLR_		1527.54	4282.14	2744.84	2053.59
KRT10	Homo sapiens	Keratin, type I cytoskeletal 10;Keratin, type I cytoskeletal 10	;K1C10_HUMAN	199;199	TRUE	_YYKTIDDLKNQILNLTTDNANILLQIDNAR_		1713.97	3830.45	3661.16	907.48
KRT10	Homo sapiens	Keratin, type I cytoskeletal 10;Keratin, type I cytoskeletal 10	;K1C10_HUMAN	335;335	TRUE	_DAEAWFNEKSK_		3104.28	3312.28	2129	778.424
KRT10	Homo sapiens	Keratin, type I cytoskeletal 10;Keratin, type I cytoskeletal 10	;K1C10_HUMAN	16;16	TRUE	_SGGGGGGGGC[Carbamidomethyl (C)]GGGGGVSSLR_		540.383	3635.16	987.031	816.489
KRT10	Homo sapiens	Keratin, type I cytoskeletal 10;Keratin, type I cytoskeletal 10	;K1C10_HUMAN	166;166	TRUE	_ALEESNYELEGKIK_		1547.83	2311.87	1478.4	370.669
KRT10	Homo sapiens	Keratin, type I cytoskeletal 10;Keratin, type I cytoskeletal 10	;K1C10_HUMAN	178;178	TRUE	_IKEWYEKHGNSHQGEPR_		370.004	1552.34	860.737	164.943
KRT10	Homo sapiens	Keratin, type I cytoskeletal 10;Keratin, type I cytoskeletal 10	;K1C10_HUMAN	164;164	TRUE	_VRALEESNYELEGK_		808.733	1185.15	644.731	96.1644
KRT10	Homo sapiens	Keratin, type I cytoskeletal 10;Keratin, type I cytoskeletal 10	;K1C10_HUMAN	258;258	TRUE	_VLDELTLTKADLEMQIESLTEELAYLK_	32.5686	214.741	1039.36	756.457	497.648
KRT10	Homo sapiens	Keratin, type I cytoskeletal 10;Keratin, type I cytoskeletal 10	;K1C10_HUMAN	258;258	TRUE	_VLDELTLTKADLEM[Oxidation (M)]QIESLTEELAYLK_	32.5686	214.741	1039.36	756.457	497.648
KRT10	Homo sapiens	Keratin, type I cytoskeletal 10;Keratin, type I cytoskeletal 10	;K1C10_HUMAN	238;238	TRUE	_YENEVALRQSVEADINGLR_		346.569	425.476	327.154	513.711
KRT10	Homo sapiens	Keratin, type I cytoskeletal 10;Keratin, type I cytoskeletal 10	;K1C10_HUMAN	423;423	TRUE	_AETEC[Carbamidomethyl (C)]QNTEYQQLLDIKIRLENEIQTYR_		130.939	666.304	173.811	75.9657
KRT10	Homo sapiens	Keratin, type I cytoskeletal 10;Keratin, type I cytoskeletal 10	;K1C10_HUMAN	2;2	TRUE	_[Acetyl (Protein N-term)]SVRYSSSKHYSSSR_		173.329	97.3939	296.346	61.7321
KRT10	Homo sapiens	Keratin, type I cytoskeletal 10;Keratin, type I cytoskeletal 10	;K1C10_HUMAN	451;451	TRUE	_SLLEGEGSSGGGGR_		110848	330218	196408	112214
KRT10	Homo sapiens	Keratin, type I cytoskeletal 10;Keratin, type I cytoskeletal 10	;K1C10_HUMAN	185;185	TRUE	_HGNSHQGEPRDYSK_			1557.77	618.991	274.291
KRT14	Homo sapiens	Keratin, type I cytoskeletal 14;Keratin, type I cytoskeletal 14	;K1C14_HUMAN	176;176	TRUE	_ILTATVDNANVLLQIDNAR_	865.024	12425.6	44267.3	48759	21421.7
KRT14	Homo sapiens	Keratin, type I cytoskeletal 14;Keratin, type I cytoskeletal 14	;K1C14_HUMAN	418;418	TRUE	_LLEGEDAHLSSSQFSSGSQSSR_	141.812	6167.26	34182.7	52871.9	10557.6
KRT14	Homo sapiens	Keratin, type I cytoskeletal 14;Keratin, type I cytoskeletal 14	;K1C14_HUMAN	117;117	FALSE	_VTMQNLNDR_		270682	582323	563235	272976
KRT14	Homo sapiens	Keratin, type I cytoskeletal 14;Keratin, type I cytoskeletal 14	;K1C14_HUMAN	117;117	FALSE	_VTM[Oxidation (M)]QNLNDR_		270682	582323	563235	272976
KRT14	Homo sapiens	Keratin, type I cytoskeletal 14;Keratin, type I cytoskeletal 14	;K1C14_HUMAN	126;126	FALSE	_LASYLDK_		146814	446783	468817	198412
KRT14	Homo sapiens	Keratin, type I cytoskeletal 14;Keratin, type I cytoskeletal 14	;K1C14_HUMAN	195;195	FALSE	_LAADDFR_	17.5745	220896	425381	355827	227452
KRT14	Homo sapiens	Keratin, type I cytoskeletal 14;Keratin, type I cytoskeletal 14	;K1C14_HUMAN	224;224	FALSE	_VLDELTLAR_		102595	285698	414138	147027
KRT14	Homo sapiens	Keratin, type I cytoskeletal 14;Keratin, type I cytoskeletal 14	;K1C14_HUMAN	135;135	FALSE	_ALEEANADLEVK_	205.567	32632.6	196026	187238	53716
KRT14	Homo sapiens	Keratin, type I cytoskeletal 14;Keratin, type I cytoskeletal 14	;K1C14_HUMAN	212;212	FALSE	_MSVEADINGLRR_	35.0653	33926.3	112524	159369	42411.1
KRT14	Homo sapiens	Keratin, type I cytoskeletal 14;Keratin, type I cytoskeletal 14	;K1C14_HUMAN	212;212	FALSE	_M[Oxidation (M)]SVEADINGLRR_	35.0653	33926.3	112524	159369	42411.1
KRT14	Homo sapiens	Keratin, type I cytoskeletal 14;Keratin, type I cytoskeletal 14	;K1C14_HUMAN	406;406	FALSE	_TRLEQEIATYR_		17874.8	162262	116206	35957.1
KRT14	Homo sapiens	Keratin, type I cytoskeletal 14;Keratin, type I cytoskeletal 14	;K1C14_HUMAN	283;283	FALSE	_ILNEMRDQYEK_		37998.2	99189.6	146752	39427.1
KRT14	Homo sapiens	Keratin, type I cytoskeletal 14;Keratin, type I cytoskeletal 14	;K1C14_HUMAN	283;283	FALSE	_ILNEM[Oxidation (M)]RDQYEK_		37998.2	99189.6	146752	39427.1
KRT14	Homo sapiens	Keratin, type I cytoskeletal 14;Keratin, type I cytoskeletal 14	;K1C14_HUMAN	301;301	TRUE	_DAEEWFFTK_		12765.1	77322.9	124558	34162.3
KRT14	Homo sapiens	Keratin, type I cytoskeletal 14;Keratin, type I cytoskeletal 14	;K1C14_HUMAN	42;42	TRUE	_APSTYGGGLSVSSSR_		20671.7	60896.1	104886	30912.6
KRT14	Homo sapiens	Keratin, type I cytoskeletal 14;Keratin, type I cytoskeletal 14	;K1C14_HUMAN	202;202	TRUE	_TKYETELNLR_		21756.1	66711.9	94035.6	27054.5
KRT14	Homo sapiens	Keratin, type I cytoskeletal 14;Keratin, type I cytoskeletal 14	;K1C14_HUMAN	126;126	FALSE	_LASYLDKVR_		29202.1	57221.8	54119.5	21485.9
KRT14	Homo sapiens	Keratin, type I cytoskeletal 14;Keratin, type I cytoskeletal 14	;K1C14_HUMAN	408;408	FALSE	_LEQEIATYR_		8154.02	72511.4	52382.1	23031.4
KRT14	Homo sapiens	Keratin, type I cytoskeletal 14;Keratin, type I cytoskeletal 14	;K1C14_HUMAN	117;117	FALSE	_VTMQNLNDRLASYLDKVR_		54325.1	55467.2	35131.5	11141.2
KRT14	Homo sapiens	Keratin, type I cytoskeletal 14;Keratin, type I cytoskeletal 14	;K1C14_HUMAN	117;117	FALSE	_VTM[Oxidation (M)]QNLNDRLASYLDKVR_		54325.1	55467.2	35131.5	11141.2
KRT14	Homo sapiens	Keratin, type I cytoskeletal 14;Keratin, type I cytoskeletal 14	;K1C14_HUMAN	353;353	FALSE	_ASLENSLEETK_		6797.09	48010.5	59544.5	15878.7
KRT14	Homo sapiens	Keratin, type I cytoskeletal 14;Keratin, type I cytoskeletal 14	;K1C14_HUMAN	353;353	FALSE	_ASLENSLEETKGR_		7238.41	49485.2	53844.5	12389.8
KRT14	Homo sapiens	Keratin, type I cytoskeletal 14;Keratin, type I cytoskeletal 14	;K1C14_HUMAN	154;154	TRUE	_QRPAEIKDYSPYFK_		6958.19	30141.2	38097	7114.19
KRT14	Homo sapiens	Keratin, type I cytoskeletal 14;Keratin, type I cytoskeletal 14	;K1C14_HUMAN	316;316	FALSE	_EVATNSELVQSGK_		5552.13	24142.6	37956.2	10917.5
KRT14	Homo sapiens	Keratin, type I cytoskeletal 14;Keratin, type I cytoskeletal 14	;K1C14_HUMAN	310;310	FALSE	_TEELNREVATNSELVQSGK_		3447.33	17922.2	31775	6480.87
KRT14	Homo sapiens	Keratin, type I cytoskeletal 14;Keratin, type I cytoskeletal 14	;K1C14_HUMAN	262;262	TRUE	_GQVGGDVNVEMDAAPGVDLSR_	75.6196	5393.88	23137.4	23055.7	7446.36
KRT14	Homo sapiens	Keratin, type I cytoskeletal 14;Keratin, type I cytoskeletal 14	;K1C14_HUMAN	262;262	TRUE	_GQVGGDVNVEM[Oxidation (M)]DAAPGVDLSR_	75.6196	5393.88	23137.4	23055.7	7446.36
KRT14	Homo sapiens	Keratin, type I cytoskeletal 14;Keratin, type I cytoskeletal 14	;K1C14_HUMAN	212;212	FALSE	_MSVEADINGLR_		5213.27	17167.6	25113.1	9836.34
KRT14	Homo sapiens	Keratin, type I cytoskeletal 14;Keratin, type I cytoskeletal 14	;K1C14_HUMAN	212;212	FALSE	_M[Oxidation (M)]SVEADINGLR_		5213.27	17167.6	25113.1	9836.34
KRT14	Homo sapiens	Keratin, type I cytoskeletal 14;Keratin, type I cytoskeletal 14	;K1C14_HUMAN	337;337	TRUE	_TMQNLEIELQSQLSM[Oxidation (M)]K_	201.435	5158.21	19499.7	24270.5	5767.16
KRT14	Homo sapiens	Keratin, type I cytoskeletal 14;Keratin, type I cytoskeletal 14	;K1C14_HUMAN	337;337	TRUE	_TMQNLEIELQSQLSMK_	201.435	5158.21	19499.7	24270.5	5767.16
KRT14	Homo sapiens	Keratin, type I cytoskeletal 14;Keratin, type I cytoskeletal 14	;K1C14_HUMAN	337;337	TRUE	_TM[Oxidation (M)]QNLEIELQSQLSM[Oxidation (M)]K_	201.435	5158.21	19499.7	24270.5	5767.16
KRT14	Homo sapiens	Keratin, type I cytoskeletal 14;Keratin, type I cytoskeletal 14	;K1C14_HUMAN	337;337	TRUE	_TM[Oxidation (M)]QNLEIELQSQLSMK_	201.435	5158.21	19499.7	24270.5	5767.16
KRT14	Homo sapiens	Keratin, type I cytoskeletal 14;Keratin, type I cytoskeletal 14	;K1C14_HUMAN	252;252	FALSE	_NHEEEMNALR_		3467.69	17742.1	24884	4929.79
KRT14	Homo sapiens	Keratin, type I cytoskeletal 14;Keratin, type I cytoskeletal 14	;K1C14_HUMAN	252;252	FALSE	_NHEEEM[Oxidation (M)]NALR_		3467.69	17742.1	24884	4929.79
KRT14	Homo sapiens	Keratin, type I cytoskeletal 14;Keratin, type I cytoskeletal 14	;K1C14_HUMAN	7;7	FALSE	_QFTSSSSMK_		2889.96	15539.4	24766.6	6412.94
KRT14	Homo sapiens	Keratin, type I cytoskeletal 14;Keratin, type I cytoskeletal 14	;K1C14_HUMAN	7;7	FALSE	_QFTSSSSM[Oxidation (M)]K_		2889.96	15539.4	24766.6	6412.94
KRT14	Homo sapiens	Keratin, type I cytoskeletal 14;Keratin, type I cytoskeletal 14	;K1C14_HUMAN	223;223	FALSE	_RVLDELTLAR_		3860.62	16161.7	23006.8	6185.99
KRT14	Homo sapiens	Keratin, type I cytoskeletal 14;Keratin, type I cytoskeletal 14	;K1C14_HUMAN	117;117	FALSE	_VTMQNLNDRLASYLDK_		18059.8	18503.4	10168.2	1559.25
KRT14	Homo sapiens	Keratin, type I cytoskeletal 14;Keratin, type I cytoskeletal 14	;K1C14_HUMAN	117;117	FALSE	_VTM[Oxidation (M)]QNLNDRLASYLDK_		18059.8	18503.4	10168.2	1559.25
KRT14	Homo sapiens	Keratin, type I cytoskeletal 14;Keratin, type I cytoskeletal 14	;K1C14_HUMAN	408;408	FALSE	_LEQEIATYRR_		3124.56	15877.1	21437.2	6480.08
KRT14	Homo sapiens	Keratin, type I cytoskeletal 14;Keratin, type I cytoskeletal 14	;K1C14_HUMAN	161;161	FALSE	_DYSPYFK_		2606.78	13597.7	20052.5	4667.24
KRT14	Homo sapiens	Keratin, type I cytoskeletal 14;Keratin, type I cytoskeletal 14	;K1C14_HUMAN	406;406	FALSE	_TRLEQEIATYRR_		2566.67	10150.4	17437.9	4321.23
KRT14	Homo sapiens	Keratin, type I cytoskeletal 14;Keratin, type I cytoskeletal 14	;K1C14_HUMAN	301;301	TRUE	_DAEEWFFTKTEELNR_		2308.86	12382.9	15793.7	2889.79
KRT14	Homo sapiens	Keratin, type I cytoskeletal 14;Keratin, type I cytoskeletal 14	;K1C14_HUMAN	233;233	TRUE	_ADLEMQIESLKEELAYLKK_	7.39313	1034.69	10860.9	12762.8	2463.52
KRT14	Homo sapiens	Keratin, type I cytoskeletal 14;Keratin, type I cytoskeletal 14	;K1C14_HUMAN	233;233	TRUE	_ADLEM[Oxidation (M)]QIESLKEELAYLKK_	7.39313	1034.69	10860.9	12762.8	2463.52
KRT14	Homo sapiens	Keratin, type I cytoskeletal 14;Keratin, type I cytoskeletal 14	;K1C14_HUMAN	329;329	FALSE	_SEISELR_		2210.53	9267.23	11106.8	4198.49
KRT14	Homo sapiens	Keratin, type I cytoskeletal 14;Keratin, type I cytoskeletal 14	;K1C14_HUMAN	233;233	TRUE	_ADLEMQIESLKEELAYLK_		1094.19	9158.11	12837.9	2834.58
KRT14	Homo sapiens	Keratin, type I cytoskeletal 14;Keratin, type I cytoskeletal 14	;K1C14_HUMAN	233;233	TRUE	_ADLEM[Oxidation (M)]QIESLKEELAYLK_		1094.19	9158.11	12837.9	2834.58
KRT14	Homo sapiens	Keratin, type I cytoskeletal 14;Keratin, type I cytoskeletal 14	;K1C14_HUMAN	316;316	FALSE	_EVATNSELVQSGKSEISELRR_		4865.47	9527.88	10237.7	1288.73
KRT14	Homo sapiens	Keratin, type I cytoskeletal 14;Keratin, type I cytoskeletal 14	;K1C14_HUMAN	417;417	TRUE	_RLLEGEDAHLSSSQFSSGSQSSR_	16.0532	1248.3	8745.49	13103.1	1838.94
KRT14	Homo sapiens	Keratin, type I cytoskeletal 14;Keratin, type I cytoskeletal 14	;K1C14_HUMAN	31;31	FALSE	_ISSVLAGGSC[Carbamidomethyl (C)]R_		1470.21	11003	3158.28	1707.22
KRT14	Homo sapiens	Keratin, type I cytoskeletal 14;Keratin, type I cytoskeletal 14	;K1C14_HUMAN	204;204	TRUE	_YETELNLR_		1496.96	4016.86	5672.84	1990.99
KRT14	Homo sapiens	Keratin, type I cytoskeletal 14;Keratin, type I cytoskeletal 14	;K1C14_HUMAN	16;16	FALSE	_GSC[Carbamidomethyl (C)]GIGGGIGGGSSR_		881.876	7670.17	2445.8	1344.7
KRT14	Homo sapiens	Keratin, type I cytoskeletal 14;Keratin, type I cytoskeletal 14	;K1C14_HUMAN	300;300	TRUE	_KDAEEWFFTK_		621.019	3174.98	6194.24	1270.45
KRT14	Homo sapiens	Keratin, type I cytoskeletal 14;Keratin, type I cytoskeletal 14	;K1C14_HUMAN	329;329	FALSE	_SEISELRR_		656.784	2358.65	3965.31	927.798
KRT14	Homo sapiens	Keratin, type I cytoskeletal 14;Keratin, type I cytoskeletal 14	;K1C14_HUMAN	251;251	FALSE	_KNHEEEMNALR_		450.806	2620.51	3911.64	628.496
KRT14	Homo sapiens	Keratin, type I cytoskeletal 14;Keratin, type I cytoskeletal 14	;K1C14_HUMAN	251;251	FALSE	_KNHEEEM[Oxidation (M)]NALR_		450.806	2620.51	3911.64	628.496
KRT14	Homo sapiens	Keratin, type I cytoskeletal 14;Keratin, type I cytoskeletal 14	;K1C14_HUMAN	147;147	FALSE	_IRDWYQR_		461.562	2247.72	3632.53	966.094
KRT14	Homo sapiens	Keratin, type I cytoskeletal 14;Keratin, type I cytoskeletal 14	;K1C14_HUMAN	174;174	TRUE	_NKILTATVDNANVLLQIDNAR_		762.191	1779.05	2110.78	550.394
KRT14	Homo sapiens	Keratin, type I cytoskeletal 14;Keratin, type I cytoskeletal 14	;K1C14_HUMAN	283;283	FALSE	_ILNEMRDQYEKMAEK_		1382.46	1001.32	1009.67	1045.02
KRT14	Homo sapiens	Keratin, type I cytoskeletal 14;Keratin, type I cytoskeletal 14	;K1C14_HUMAN	252;252	TRUE	_NHEEEMNALRGQVGGDVNVEMDAAPGVDLSR_	12.7631	398.933	2032.78	1719.69	251.15
KRT14	Homo sapiens	Keratin, type I cytoskeletal 14;Keratin, type I cytoskeletal 14	;K1C14_HUMAN	252;252	TRUE	_NHEEEMNALRGQVGGDVNVEM[Oxidation (M)]DAAPGVDLSR_	12.7631	398.933	2032.78	1719.69	251.15
KRT14	Homo sapiens	Keratin, type I cytoskeletal 14;Keratin, type I cytoskeletal 14	;K1C14_HUMAN	252;252	TRUE	_NHEEEM[Oxidation (M)]NALRGQVGGDVNVEM[Oxidation (M)]DAAPGVDLSR_	12.7631	398.933	2032.78	1719.69	251.15
KRT14	Homo sapiens	Keratin, type I cytoskeletal 14;Keratin, type I cytoskeletal 14	;K1C14_HUMAN	316;316	FALSE	_EVATNSELVQSGKSEISELR_		418.792	1677.16	1597.09	330.9
KRT14	Homo sapiens	Keratin, type I cytoskeletal 14;Keratin, type I cytoskeletal 14	;K1C14_HUMAN	298;298	TRUE	_NRKDAEEWFFTK_		244.679	1373.24	2005.32	259.878
KRT14	Homo sapiens	Keratin, type I cytoskeletal 14;Keratin, type I cytoskeletal 14	;K1C14_HUMAN	301;301	TRUE	_DAEEWFFTKTEELNREVATNSELVQSGK_		217.452	1695.83	1389.96	161.895
KRT14	Homo sapiens	Keratin, type I cytoskeletal 14;Keratin, type I cytoskeletal 14	;K1C14_HUMAN	195;195	TRUE	_LAADDFRTKYETELNLR_		1652.18	706.984	802.467	204.742
KRT14	Homo sapiens	Keratin, type I cytoskeletal 14;Keratin, type I cytoskeletal 14	;K1C14_HUMAN	452;452	TRUE	_VMDVHDGKVVSTHEQVLR_		265.306	2107.79	435.12	303.698
KRT14	Homo sapiens	Keratin, type I cytoskeletal 14;Keratin, type I cytoskeletal 14	;K1C14_HUMAN	452;452	TRUE	_VM[Oxidation (M)]DVHDGKVVSTHEQVLR_		265.306	2107.79	435.12	303.698
KRT14	Homo sapiens	Keratin, type I cytoskeletal 14;Keratin, type I cytoskeletal 14	;K1C14_HUMAN	168;168	FALSE	_TIEDLRNK_		447.659	815.37	760.54	214.813
KRT14	Homo sapiens	Keratin, type I cytoskeletal 14;Keratin, type I cytoskeletal 14	;K1C14_HUMAN	300;300	TRUE	_KDAEEWFFTKTEELNR_		185.792	613.566	747.485	140.893
KRT14	Homo sapiens	Keratin, type I cytoskeletal 14;Keratin, type I cytoskeletal 14	;K1C14_HUMAN	450;450	TRUE	_TKVMDVHDGKVVSTHEQVLR_		85.1202	482.113	661.534	31.5731
KRT14	Homo sapiens	Keratin, type I cytoskeletal 14;Keratin, type I cytoskeletal 14	;K1C14_HUMAN	450;450	TRUE	_TKVM[Oxidation (M)]DVHDGKVVSTHEQVLR_		85.1202	482.113	661.534	31.5731
KRT14	Homo sapiens	Keratin, type I cytoskeletal 14;Keratin, type I cytoskeletal 14	;K1C14_HUMAN	418;418	TRUE	_LLEGEDAHLSSSQFSSGSQSSRDVTSSSR_		205.182	348.522	258.759	293.875
KRT14	Homo sapiens	Keratin, type I cytoskeletal 14;Keratin, type I cytoskeletal 14	;K1C14_HUMAN	460;460	TRUE	_VVSTHEQVLR_		252.893	6370.57	2604.61	448.189
KRT14	Homo sapiens	Keratin, type I cytoskeletal 14;Keratin, type I cytoskeletal 14	;K1C14_HUMAN	389;389	FALSE	_C[Carbamidomethyl (C)]EMEQQNQEYK_		101.329	1458.22	118.947	130.428
KRT14	Homo sapiens	Keratin, type I cytoskeletal 14;Keratin, type I cytoskeletal 14	;K1C14_HUMAN	389;389	FALSE	_C[Carbamidomethyl (C)]EM[Oxidation (M)]EQQNQEYK_		101.329	1458.22	118.947	130.428
KRT14	Homo sapiens	Keratin, type I cytoskeletal 14;Keratin, type I cytoskeletal 14	;K1C14_HUMAN	336;336	TRUE	_RTMQNLEIELQSQLSM[Oxidation (M)]K_		156.257	480.439	1003.42
KRT14	Homo sapiens	Keratin, type I cytoskeletal 14;Keratin, type I cytoskeletal 14	;K1C14_HUMAN	336;336	TRUE	_RTMQNLEIELQSQLSMK_		156.257	480.439	1003.42
KRT14	Homo sapiens	Keratin, type I cytoskeletal 14;Keratin, type I cytoskeletal 14	;K1C14_HUMAN	7;7	FALSE	_QFTSSSSM[Oxidation (M)]KGSC[Carbamidomethyl (C)]GIGGGIGGGSSR_		65.4792	918.329	103.29
KRT14	Homo sapiens	Keratin, type I cytoskeletal 14;Keratin, type I cytoskeletal 14	;K1C14_HUMAN	133;133	FALSE	_VRALEEANADLEVK_		77.5788	599.349	49.1625
KRT14	Homo sapiens	Keratin, type I cytoskeletal 14;Keratin, type I cytoskeletal 14	;K1C14_HUMAN	156;156	TRUE	_PAEIKDYSPYFK_		47.9072	163.807	267.064
KRT14	Homo sapiens	Keratin, type I cytoskeletal 14;Keratin, type I cytoskeletal 14	;K1C14_HUMAN	233;233	TRUE	_ADLEMQIESLK_			91.0474	307.22
KRT15	Homo sapiens	Keratin, type I cytoskeletal 15;Keratin, type I cytoskeletal 15	;K1C15_HUMAN	203;203	FALSE	_QGVEADINGLRR_		90.5925	287.675		173.359
KRT15	Homo sapiens	Keratin, type I cytoskeletal 15;Keratin, type I cytoskeletal 15	;K1C15_HUMAN	243;243	TRUE	_NHEEEM[Oxidation (M)]KEFSSQLAGQVNVEMDAAPGVDLTR_			13.4295		13.2332
KRT16	Homo sapiens	Keratin, type I cytoskeletal 16;Keratin, type I cytoskeletal 16	;K1C16_HUMAN	420;420	TRUE	_LLEGEDAHLSSQQASGQSYSSR_	38.3321	1213.67	18598.6	16632.6	4507.71
KRT16	Homo sapiens	Keratin, type I cytoskeletal 16;Keratin, type I cytoskeletal 16	;K1C16_HUMAN	285;285	TRUE	_ILNEMRDQYEQMAEK_		16686	67945.4	93982.7	38628
KRT16	Homo sapiens	Keratin, type I cytoskeletal 16;Keratin, type I cytoskeletal 16	;K1C16_HUMAN	285;285	TRUE	_ILNEMRDQYEQM[Oxidation (M)]AEK_		16686	67945.4	93982.7	38628
KRT16	Homo sapiens	Keratin, type I cytoskeletal 16;Keratin, type I cytoskeletal 16	;K1C16_HUMAN	285;285	TRUE	_ILNEM[Oxidation (M)]RDQYEQMAEK_		16686	67945.4	93982.7	38628
KRT16	Homo sapiens	Keratin, type I cytoskeletal 16;Keratin, type I cytoskeletal 16	;K1C16_HUMAN	285;285	TRUE	_ILNEM[Oxidation (M)]RDQYEQM[Oxidation (M)]AEK_		16686	67945.4	93982.7	38628
KRT16	Homo sapiens	Keratin, type I cytoskeletal 16;Keratin, type I cytoskeletal 16	;K1C16_HUMAN	42;42	TRUE	_APSTYGGGLSVSSR_		13907.5	50532.3	72327.9	29745.6
KRT16	Homo sapiens	Keratin, type I cytoskeletal 16;Keratin, type I cytoskeletal 16	;K1C16_HUMAN	303;303	TRUE	_DAETWFLSK_		10728.3	52984.8	67626	23218.1
KRT16	Homo sapiens	Keratin, type I cytoskeletal 16;Keratin, type I cytoskeletal 16	;K1C16_HUMAN	312;312	TRUE	_TEELNKEVASNSELVQSSR_		6359.46	52419.4	66742.9	21793.3
KRT16	Homo sapiens	Keratin, type I cytoskeletal 16;Keratin, type I cytoskeletal 16	;K1C16_HUMAN	214;214	TRUE	_QTVEADVNGLRR_		12234.1	40104	56097.2	23729.3
KRT16	Homo sapiens	Keratin, type I cytoskeletal 16;Keratin, type I cytoskeletal 16	;K1C16_HUMAN	178;178	TRUE	_IIAATIENAQPILQIDNAR_		8901.26	42161	44652.3	17029.8
KRT16	Homo sapiens	Keratin, type I cytoskeletal 16;Keratin, type I cytoskeletal 16	;K1C16_HUMAN	204;204	TRUE	_TKYEHELALR_		6098.92	29661.5	44781.2	14864.1
KRT16	Homo sapiens	Keratin, type I cytoskeletal 16;Keratin, type I cytoskeletal 16	;K1C16_HUMAN	235;235	TRUE	_TDLEMQIEGLKEELAYLR_		1507.47	25453.3	34924.4	10423.3
KRT16	Homo sapiens	Keratin, type I cytoskeletal 16;Keratin, type I cytoskeletal 16	;K1C16_HUMAN	235;235	TRUE	_TDLEM[Oxidation (M)]QIEGLKEELAYLR_		1507.47	25453.3	34924.4	10423.3
KRT16	Homo sapiens	Keratin, type I cytoskeletal 16;Keratin, type I cytoskeletal 16	;K1C16_HUMAN	442;442	TRUE	_EVFTSSSSSSSR_		5181.34	21702.1	23637.8	9303.85
KRT16	Homo sapiens	Keratin, type I cytoskeletal 16;Keratin, type I cytoskeletal 16	;K1C16_HUMAN	264;264	TRUE	_GQTGGDVNVEMDAAPGVDLSR_	30.0958	2328.04	16690.2	18514.7	8119.81
KRT16	Homo sapiens	Keratin, type I cytoskeletal 16;Keratin, type I cytoskeletal 16	;K1C16_HUMAN	264;264	TRUE	_GQTGGDVNVEM[Oxidation (M)]DAAPGVDLSR_	30.0958	2328.04	16690.2	18514.7	8119.81
KRT16	Homo sapiens	Keratin, type I cytoskeletal 16;Keratin, type I cytoskeletal 16	;K1C16_HUMAN	253;253	TRUE	_KNHEEEMLALR_		1146.79	14739.4	21163	4731.57
KRT16	Homo sapiens	Keratin, type I cytoskeletal 16;Keratin, type I cytoskeletal 16	;K1C16_HUMAN	253;253	TRUE	_KNHEEEM[Oxidation (M)]LALR_		1146.79	14739.4	21163	4731.57
KRT16	Homo sapiens	Keratin, type I cytoskeletal 16;Keratin, type I cytoskeletal 16	;K1C16_HUMAN	156;156	TRUE	_QRPSEIKDYSPYFK_		1788.79	10624.4	15349.5	3585.65
KRT16	Homo sapiens	Keratin, type I cytoskeletal 16;Keratin, type I cytoskeletal 16	;K1C16_HUMAN	214;214	TRUE	_QTVEADVNGLR_		1352.76	5549.57	11839.5	3420.2
KRT16	Homo sapiens	Keratin, type I cytoskeletal 16;Keratin, type I cytoskeletal 16	;K1C16_HUMAN	331;331	TRUE	_SEVTELR_		750.681	7936.25	9627.04	3259.32
KRT16	Homo sapiens	Keratin, type I cytoskeletal 16;Keratin, type I cytoskeletal 16	;K1C16_HUMAN	254;254	TRUE	_NHEEEMLALR_		503.102	6004.76	9124.28	2659.49
KRT16	Homo sapiens	Keratin, type I cytoskeletal 16;Keratin, type I cytoskeletal 16	;K1C16_HUMAN	254;254	TRUE	_NHEEEM[Oxidation (M)]LALR_		503.102	6004.76	9124.28	2659.49
KRT16	Homo sapiens	Keratin, type I cytoskeletal 16;Keratin, type I cytoskeletal 16	;K1C16_HUMAN	339;339	TRUE	_VLQGLEIELQSQLSM[Oxidation (M)]K_	47.8312	745.611	6882.15	7579.6	2379.45
KRT16	Homo sapiens	Keratin, type I cytoskeletal 16;Keratin, type I cytoskeletal 16	;K1C16_HUMAN	339;339	TRUE	_VLQGLEIELQSQLSMK_	47.8312	745.611	6882.15	7579.6	2379.45
KRT16	Homo sapiens	Keratin, type I cytoskeletal 16;Keratin, type I cytoskeletal 16	;K1C16_HUMAN	318;318	TRUE	_EVASNSELVQSSR_		341.207	3591.26	4723.59	1389.45
KRT16	Homo sapiens	Keratin, type I cytoskeletal 16;Keratin, type I cytoskeletal 16	;K1C16_HUMAN	176;176	TRUE	_NKIIAATIENAQPILQIDNAR_		2399.95	3081.9	2750.27	726.621
KRT16	Homo sapiens	Keratin, type I cytoskeletal 16;Keratin, type I cytoskeletal 16	;K1C16_HUMAN	291;291	TRUE	_DQYEQMAEK_		233.396	1843.93	3975.06	974.836
KRT16	Homo sapiens	Keratin, type I cytoskeletal 16;Keratin, type I cytoskeletal 16	;K1C16_HUMAN	291;291	TRUE	_DQYEQM[Oxidation (M)]AEK_		233.396	1843.93	3975.06	974.836
KRT16	Homo sapiens	Keratin, type I cytoskeletal 16;Keratin, type I cytoskeletal 16	;K1C16_HUMAN	303;303	TRUE	_DAETWFLSKTEELNKEVASNSELVQSSR_		848.168	1660.91	880.361	351.674
KRT16	Homo sapiens	Keratin, type I cytoskeletal 16;Keratin, type I cytoskeletal 16	;K1C16_HUMAN	338;338	TRUE	_RVLQGLEIELQSQLSM[Oxidation (M)]K_	4.21546	106.889	1493.02	1230.69	486.212
KRT16	Homo sapiens	Keratin, type I cytoskeletal 16;Keratin, type I cytoskeletal 16	;K1C16_HUMAN	338;338	TRUE	_RVLQGLEIELQSQLSMK_	4.21546	106.889	1493.02	1230.69	486.212
KRT16	Homo sapiens	Keratin, type I cytoskeletal 16;Keratin, type I cytoskeletal 16	;K1C16_HUMAN	302;302	TRUE	_RDAETWFLSK_			790.751	762.023	360.521
KRT16	Homo sapiens	Keratin, type I cytoskeletal 16;Keratin, type I cytoskeletal 16	;K1C16_HUMAN	246;246	TRUE	_EELAYLR_			438.428	584.758	252.662
KRT16	Homo sapiens	Keratin, type I cytoskeletal 16;Keratin, type I cytoskeletal 16	;K1C16_HUMAN	197;197	TRUE	_LAADDFRTKYEHELALR_		470.004	265.611	323.306	226.463
KRT16	Homo sapiens	Keratin, type I cytoskeletal 16;Keratin, type I cytoskeletal 16	;K1C16_HUMAN	331;331	TRUE	_SEVTELRR_		5.26208	225.04	474.168	29.6889
KRT16	Homo sapiens	Keratin, type I cytoskeletal 16;Keratin, type I cytoskeletal 16	;K1C16_HUMAN	454;454	TRUE	_QTRPILKEQSSSSFSQGQSS_		83.231	239.204	56.6782	137.623
KRT16	Homo sapiens	Keratin, type I cytoskeletal 16;Keratin, type I cytoskeletal 16	;K1C16_HUMAN	454;454	TRUE	_QTRPILK_			86.9736	93.5178	59.5498
KRT16	Homo sapiens	Keratin, type I cytoskeletal 16;Keratin, type I cytoskeletal 16	;K1C16_HUMAN	419;419	TRUE	_RLLEGEDAHLSSQQASGQSYSSR_		221.808	4497.89	4375.4	996.993
KRT16	Homo sapiens	Keratin, type I cytoskeletal 16;Keratin, type I cytoskeletal 16	;K1C16_HUMAN	235;235	TRUE	_TDLEMQIEGLKEELAYLRK_		132.56	2622.85	3485.31	655.04
KRT16	Homo sapiens	Keratin, type I cytoskeletal 16;Keratin, type I cytoskeletal 16	;K1C16_HUMAN	235;235	TRUE	_TDLEM[Oxidation (M)]QIEGLKEELAYLRK_		132.56	2622.85	3485.31	655.04
KRT16	Homo sapiens	Keratin, type I cytoskeletal 16;Keratin, type I cytoskeletal 16	;K1C16_HUMAN	206;206	TRUE	_YEHELALR_			402.518	371.215	215.305
KRT16	Homo sapiens	Keratin, type I cytoskeletal 16;Keratin, type I cytoskeletal 16	;K1C16_HUMAN	461;461	TRUE	_EQSSSSFSQGQSS_			226.353	7.55386	9.09989
KRT16	Homo sapiens	Keratin, type I cytoskeletal 16;Keratin, type I cytoskeletal 16	;K1C16_HUMAN	391;391	TRUE	_C[Carbamidomethyl (C)]EMEQQSQEYQILLDVK_		5.69005	83.8925		10.4034
KRT17	Homo sapiens	Keratin, type I cytoskeletal 17;Keratin, type I cytoskeletal 17	;K1C17_HUMAN	145;145	TRUE	_ILTATVDNANILLQIDNAR_	92.6534	1523.17	8613.91	7253.39	3990.3
KRT17	Homo sapiens	Keratin, type I cytoskeletal 17;Keratin, type I cytoskeletal 17	;K1C17_HUMAN	104;104	TRUE	_ALEEANTELEVK_		4714.36	19403.4	19892.4	8763.81
KRT17	Homo sapiens	Keratin, type I cytoskeletal 17;Keratin, type I cytoskeletal 17	;K1C17_HUMAN	86;86	FALSE	_ATMQNLNDR_		2488.06	10831.1	14367.5	7249.25
KRT17	Homo sapiens	Keratin, type I cytoskeletal 17;Keratin, type I cytoskeletal 17	;K1C17_HUMAN	86;86	FALSE	_ATM[Oxidation (M)]QNLNDR_		2488.06	10831.1	14367.5	7249.25
KRT17	Homo sapiens	Keratin, type I cytoskeletal 17;Keratin, type I cytoskeletal 17	;K1C17_HUMAN	130;130	TRUE	_DYSQYYR_		1752	10260.5	8261.92	4349.75
KRT17	Homo sapiens	Keratin, type I cytoskeletal 17;Keratin, type I cytoskeletal 17	;K1C17_HUMAN	270;270	TRUE	_DAEDWFFSK_		861.494	7522.27	11840.9	3476.45
KRT17	Homo sapiens	Keratin, type I cytoskeletal 17;Keratin, type I cytoskeletal 17	;K1C17_HUMAN	181;181	TRUE	_LSVEADINGLRR_	4.92763	1320.06	7123.06	6307.89	8268.73
KRT17	Homo sapiens	Keratin, type I cytoskeletal 17;Keratin, type I cytoskeletal 17	;K1C17_HUMAN	387;387	TRUE	_LLEGEDAHLTQYK_		1130.99	7864.56	8413.97	1851.31
KRT17	Homo sapiens	Keratin, type I cytoskeletal 17;Keratin, type I cytoskeletal 17	;K1C17_HUMAN	322;322	TRUE	_ASLEGNLAETENR_		3805.2	5617.75	5186.58	4571.19
KRT17	Homo sapiens	Keratin, type I cytoskeletal 17;Keratin, type I cytoskeletal 17	;K1C17_HUMAN	137;137	TRUE	_TIEELQNK_		1410.23	7879.69	6218.75	2686.88
KRT17	Homo sapiens	Keratin, type I cytoskeletal 17;Keratin, type I cytoskeletal 17	;K1C17_HUMAN	231;231	TRUE	_GQVGGEINVEM[Oxidation (M)]DAAPGVDLSR_		1035.38	3673.08	3026.85	1838.88
KRT17	Homo sapiens	Keratin, type I cytoskeletal 17;Keratin, type I cytoskeletal 17	;K1C17_HUMAN	231;231	TRUE	_GQVGGEINVEMDAAPGVDLSR_		1035.38	3673.08	3026.85	1838.88
KRT17	Homo sapiens	Keratin, type I cytoskeletal 17;Keratin, type I cytoskeletal 17	;K1C17_HUMAN	181;181	TRUE	_LSVEADINGLR_		505.9	2547.33	2093.72	1710.5
KRT17	Homo sapiens	Keratin, type I cytoskeletal 17;Keratin, type I cytoskeletal 17	;K1C17_HUMAN	7;7	TRUE	_QFTSSSSIK_		632.037	2220.56	2745.64	1052.41
KRT17	Homo sapiens	Keratin, type I cytoskeletal 17;Keratin, type I cytoskeletal 17	;K1C17_HUMAN	306;306	TRUE	_TMQALEIELQSQLSMK_	34.1794	415.933	2211.77	2354.02	1060.93
KRT17	Homo sapiens	Keratin, type I cytoskeletal 17;Keratin, type I cytoskeletal 17	;K1C17_HUMAN	306;306	TRUE	_TMQALEIELQSQLSM[Oxidation (M)]K_	34.1794	415.933	2211.77	2354.02	1060.93
KRT17	Homo sapiens	Keratin, type I cytoskeletal 17;Keratin, type I cytoskeletal 17	;K1C17_HUMAN	202;202	TRUE	_ADLEMQIENLKEELAYLK_		155.928	2131.13	1956.47	531.229
KRT17	Homo sapiens	Keratin, type I cytoskeletal 17;Keratin, type I cytoskeletal 17	;K1C17_HUMAN	202;202	TRUE	_ADLEM[Oxidation (M)]QIENLKEELAYLK_		155.928	2131.13	1956.47	531.229
KRT17	Homo sapiens	Keratin, type I cytoskeletal 17;Keratin, type I cytoskeletal 17	;K1C17_HUMAN	410;410	TRUE	_TIVEEVQDGKVISSR_		700.598	1206.85	601.617	1806.78
KRT17	Homo sapiens	Keratin, type I cytoskeletal 17;Keratin, type I cytoskeletal 17	;K1C17_HUMAN	387;387	TRUE	_LLEGEDAHLTQYKK_		102.341	1577.85	1698.16	294.793
KRT17	Homo sapiens	Keratin, type I cytoskeletal 17;Keratin, type I cytoskeletal 17	;K1C17_HUMAN	31;31	TRUE	_LSGGLGAGSC[Carbamidomethyl (C)]R_		138.875	2014.92	390.125	378.37
KRT17	Homo sapiens	Keratin, type I cytoskeletal 17;Keratin, type I cytoskeletal 17	;K1C17_HUMAN	202;202	TRUE	_ADLEMQIENLKEELAYLKK_		113.513	1290.51	855.665	230.209
KRT17	Homo sapiens	Keratin, type I cytoskeletal 17;Keratin, type I cytoskeletal 17	;K1C17_HUMAN	202;202	TRUE	_ADLEM[Oxidation (M)]QIENLKEELAYLKK_		113.513	1290.51	855.665	230.209
KRT17	Homo sapiens	Keratin, type I cytoskeletal 17;Keratin, type I cytoskeletal 17	;K1C17_HUMAN	269;269	TRUE	_KDAEDWFFSK_		56.2665	766.634	1117.9	416.809
KRT17	Homo sapiens	Keratin, type I cytoskeletal 17;Keratin, type I cytoskeletal 17	;K1C17_HUMAN	410;410	TRUE	_TIVEEVQDGK_		264.548	863.862	928.96	209.745
KRT17	Homo sapiens	Keratin, type I cytoskeletal 17;Keratin, type I cytoskeletal 17	;K1C17_HUMAN	270;270	TRUE	_DAEDWFFSKTEELNR_		152.148	1023.6	516.957	162.849
KRT17	Homo sapiens	Keratin, type I cytoskeletal 17;Keratin, type I cytoskeletal 17	;K1C17_HUMAN	386;386	TRUE	_RLLEGEDAHLTQYK_		71.1575	831.999	413.459	210.969
KRT17	Homo sapiens	Keratin, type I cytoskeletal 17;Keratin, type I cytoskeletal 17	;K1C17_HUMAN	137;137	TRUE	_TIEELQNKILTATVDNANILLQIDNAR_		29.8202	377.714	302.063	268.484
KRT17	Homo sapiens	Keratin, type I cytoskeletal 17;Keratin, type I cytoskeletal 17	;K1C17_HUMAN	7;7	TRUE	_QFTSSSSIKGSSGLGGGSSR_		352.755	187.06	221.622	139.721
KRT17	Homo sapiens	Keratin, type I cytoskeletal 17;Keratin, type I cytoskeletal 17	;K1C17_HUMAN	386;386	TRUE	_RLLEGEDAHLTQYKK_			372.465	298.064	107.83
KRT17	Homo sapiens	Keratin, type I cytoskeletal 17;Keratin, type I cytoskeletal 17	;K1C17_HUMAN	267;267	TRUE	_NRKDAEDWFFSK_			711.279	190.541	100.294
KRT18	Homo sapiens	Keratin, type I cytoskeletal 18;Keratin, type I cytoskeletal 18	;K1C18_HUMAN	138;138	TRUE	_AQIFANTVDNAR_		113337	90110	155584	124665
KRT18	Homo sapiens	Keratin, type I cytoskeletal 18;Keratin, type I cytoskeletal 18	;K1C18_HUMAN	302;302	TRUE	_TVQSLEIDLDSMR_		77719.4	75017.8	107168	98534.8
KRT18	Homo sapiens	Keratin, type I cytoskeletal 18;Keratin, type I cytoskeletal 18	;K1C18_HUMAN	302;302	TRUE	_TVQSLEIDLDSM[Oxidation (M)]R_		77719.4	75017.8	107168	98534.8
KRT18	Homo sapiens	Keratin, type I cytoskeletal 18;Keratin, type I cytoskeletal 18	;K1C18_HUMAN	91;91	TRUE	_LASYLDR_		69900.8	59987.4	103179	85459.3
KRT18	Homo sapiens	Keratin, type I cytoskeletal 18;Keratin, type I cytoskeletal 18	;K1C18_HUMAN	359;359	TRUE	_QAQEYEALLNIK_		67176.3	65806.7	96560.5	80689.6
KRT18	Homo sapiens	Keratin, type I cytoskeletal 18;Keratin, type I cytoskeletal 18	;K1C18_HUMAN	318;318	TRUE	_ASLENSLR_		62211.8	51683.8	92804.4	83671.4
KRT18	Homo sapiens	Keratin, type I cytoskeletal 18;Keratin, type I cytoskeletal 18	;K1C18_HUMAN	166;166	TRUE	_VKYETELAMR_		56594.7	56686	93770.5	73412.3
KRT18	Homo sapiens	Keratin, type I cytoskeletal 18;Keratin, type I cytoskeletal 18	;K1C18_HUMAN	166;166	TRUE	_VKYETELAM[Oxidation (M)]R_		56594.7	56686	93770.5	73412.3
KRT18	Homo sapiens	Keratin, type I cytoskeletal 18;Keratin, type I cytoskeletal 18	;K1C18_HUMAN	254;254	TRUE	_AQYDELAR_		50158.6	48592.3	69835.4	65222
KRT18	Homo sapiens	Keratin, type I cytoskeletal 18;Keratin, type I cytoskeletal 18	;K1C18_HUMAN	318;318	TRUE	_ASLENSLREVEAR_		47406.6	64178.2	83850.9	37501.5
KRT18	Homo sapiens	Keratin, type I cytoskeletal 18;Keratin, type I cytoskeletal 18	;K1C18_HUMAN	15;15	TRUE	_SLGSVQAPSYGARPVSSAASVYAGAGGSGSR_		51757.3	59168.4	66898	54511.8
KRT18	Homo sapiens	Keratin, type I cytoskeletal 18;Keratin, type I cytoskeletal 18	;K1C18_HUMAN	188;188	TRUE	_VIDDTNITR_		36440.9	36174.2	62837.9	50656.2
KRT18	Homo sapiens	Keratin, type I cytoskeletal 18;Keratin, type I cytoskeletal 18	;K1C18_HUMAN	371;371	TRUE	_VKLEAEIATYR_		31996.8	36795.5	52574	53089.2
KRT18	Homo sapiens	Keratin, type I cytoskeletal 18;Keratin, type I cytoskeletal 18	;K1C18_HUMAN	15;15	TRUE	_SLGSVQAPSYGAR_		33489.9	32454.3	48824.5	56119.8
KRT18	Homo sapiens	Keratin, type I cytoskeletal 18;Keratin, type I cytoskeletal 18	;K1C18_HUMAN	7;7	TRUE	_STFSTNYR_		32838.6	35713.1	51866.3	44752.2
KRT18	Homo sapiens	Keratin, type I cytoskeletal 18;Keratin, type I cytoskeletal 18	;K1C18_HUMAN	176;176	TRUE	_QSVENDIHGLRK_		33295.1	30425.3	48562.2	39094.3
KRT18	Homo sapiens	Keratin, type I cytoskeletal 18;Keratin, type I cytoskeletal 18	;K1C18_HUMAN	176;176	TRUE	_QSVENDIHGLR_		28503.9	27687.8	41217.8	37661.9
KRT18	Homo sapiens	Keratin, type I cytoskeletal 18;Keratin, type I cytoskeletal 18	;K1C18_HUMAN	125;125	TRUE	_DWSHYFK_		25109.3	26852.4	42980.5	35334.5
KRT18	Homo sapiens	Keratin, type I cytoskeletal 18;Keratin, type I cytoskeletal 18	;K1C18_HUMAN	28;28	TRUE	_PVSSAASVYAGAGGSGSR_		25453.8	21771.8	42042.1	39370.5
KRT18	Homo sapiens	Keratin, type I cytoskeletal 18;Keratin, type I cytoskeletal 18	;K1C18_HUMAN	383;383	TRUE	_LLEDGEDFNLGDALDSSNSM[Oxidation (M)]QTIQK_	1.9385	24781.2	21379.2	26273.3	28544.3
KRT18	Homo sapiens	Keratin, type I cytoskeletal 18;Keratin, type I cytoskeletal 18	;K1C18_HUMAN	383;383	TRUE	_LLEDGEDFNLGDALDSSNSMQTIQK_	1.9385	24781.2	21379.2	26273.3	28544.3
KRT18	Homo sapiens	Keratin, type I cytoskeletal 18;Keratin, type I cytoskeletal 18	;K1C18_HUMAN	216;216	TRUE	_NHEEEVKGLQAQIASSGLTVEVDAPK_		15778.3	20491.6	26922.4	20689.7
KRT18	Homo sapiens	Keratin, type I cytoskeletal 18;Keratin, type I cytoskeletal 18	;K1C18_HUMAN	373;373	TRUE	_LEAEIATYR_		16726.2	14142.2	26116.5	26230.7
KRT18	Homo sapiens	Keratin, type I cytoskeletal 18;Keratin, type I cytoskeletal 18	;K1C18_HUMAN	56;56	TRUE	_GGMGSGGLATGIAGGLAGMGGIQNEKETMQSLNDR_		15916	18505	24507.7	23515.1
KRT18	Homo sapiens	Keratin, type I cytoskeletal 18;Keratin, type I cytoskeletal 18	;K1C18_HUMAN	56;56	TRUE	_GGM[Oxidation (M)]GSGGLATGIAGGLAGMGGIQNEKETMQSLNDR_		15916	18505	24507.7	23515.1
KRT18	Homo sapiens	Keratin, type I cytoskeletal 18;Keratin, type I cytoskeletal 18	;K1C18_HUMAN	56;56	TRUE	_GGMGSGGLATGIAGGLAGMGGIQNEKETM[Oxidation (M)]QSLNDR_		15916	18505	24507.7	23515.1
KRT18	Homo sapiens	Keratin, type I cytoskeletal 18;Keratin, type I cytoskeletal 18	;K1C18_HUMAN	56;56	TRUE	_GGMGSGGLATGIAGGLAGM[Oxidation (M)]GGIQNEKETMQSLNDR_		15916	18505	24507.7	23515.1
KRT18	Homo sapiens	Keratin, type I cytoskeletal 18;Keratin, type I cytoskeletal 18	;K1C18_HUMAN	56;56	TRUE	_GGM[Oxidation (M)]GSGGLATGIAGGLAGM[Oxidation (M)]GGIQNEKETMQSLNDR_		15916	18505	24507.7	23515.1
KRT18	Homo sapiens	Keratin, type I cytoskeletal 18;Keratin, type I cytoskeletal 18	;K1C18_HUMAN	56;56	TRUE	_GGM[Oxidation (M)]GSGGLATGIAGGLAGMGGIQNEKETM[Oxidation (M)]QSLNDR_		15916	18505	24507.7	23515.1
KRT18	Homo sapiens	Keratin, type I cytoskeletal 18;Keratin, type I cytoskeletal 18	;K1C18_HUMAN	56;56	TRUE	_GGM[Oxidation (M)]GSGGLATGIAGGLAGM[Oxidation (M)]GGIQNEKETM[Oxidation (M)]QSLNDR_		15916	18505	24507.7	23515.1
KRT18	Homo sapiens	Keratin, type I cytoskeletal 18;Keratin, type I cytoskeletal 18	;K1C18_HUMAN	382;382	TRUE	_RLLEDGEDFNLGDALDSSNSM[Oxidation (M)]QTIQK_	0.342522	19645.3	17257.1	20433.9	20634.2
KRT18	Homo sapiens	Keratin, type I cytoskeletal 18;Keratin, type I cytoskeletal 18	;K1C18_HUMAN	382;382	TRUE	_RLLEDGEDFNLGDALDSSNSMQTIQK_	0.342522	19645.3	17257.1	20433.9	20634.2
KRT18	Homo sapiens	Keratin, type I cytoskeletal 18;Keratin, type I cytoskeletal 18	;K1C18_HUMAN	197;197	TRUE	_LQLETEIEALKEELLFMK_	63.6831	7077.85	10627.6	18517.2	22367.7
KRT18	Homo sapiens	Keratin, type I cytoskeletal 18;Keratin, type I cytoskeletal 18	;K1C18_HUMAN	197;197	TRUE	_LQLETEIEALKEELLFM[Oxidation (M)]K_	63.6831	7077.85	10627.6	18517.2	22367.7
KRT18	Homo sapiens	Keratin, type I cytoskeletal 18;Keratin, type I cytoskeletal 18	;K1C18_HUMAN	82;82	FALSE	_ETMQSLNDR_		9146.33	7193.8	12892.6	12533.8
KRT18	Homo sapiens	Keratin, type I cytoskeletal 18;Keratin, type I cytoskeletal 18	;K1C18_HUMAN	82;82	FALSE	_ETM[Oxidation (M)]QSLNDR_		9146.33	7193.8	12892.6	12533.8
KRT18	Homo sapiens	Keratin, type I cytoskeletal 18;Keratin, type I cytoskeletal 18	;K1C18_HUMAN	168;168	TRUE	_YETELAMR_		8554.26	7863.38	13360.3	11324.3
KRT18	Homo sapiens	Keratin, type I cytoskeletal 18;Keratin, type I cytoskeletal 18	;K1C18_HUMAN	168;168	TRUE	_YETELAM[Oxidation (M)]R_		8554.26	7863.38	13360.3	11324.3
KRT18	Homo sapiens	Keratin, type I cytoskeletal 18;Keratin, type I cytoskeletal 18	;K1C18_HUMAN	371;371	TRUE	_VKLEAEIATYRR_		6879.5	11162.7	13958.6	9073.15
KRT18	Homo sapiens	Keratin, type I cytoskeletal 18;Keratin, type I cytoskeletal 18	;K1C18_HUMAN	301;301	TRUE	_RTVQSLEIDLDSMR_		7476.62	8352.45	12258.3	10282.7
KRT18	Homo sapiens	Keratin, type I cytoskeletal 18;Keratin, type I cytoskeletal 18	;K1C18_HUMAN	301;301	TRUE	_RTVQSLEIDLDSM[Oxidation (M)]R_		7476.62	8352.45	12258.3	10282.7
KRT18	Homo sapiens	Keratin, type I cytoskeletal 18;Keratin, type I cytoskeletal 18	;K1C18_HUMAN	197;197	TRUE	_LQLETEIEALKEELLFMKK_	28.5571	3130.06	11383.9	13462.2	9622.66
KRT18	Homo sapiens	Keratin, type I cytoskeletal 18;Keratin, type I cytoskeletal 18	;K1C18_HUMAN	197;197	TRUE	_LQLETEIEALKEELLFM[Oxidation (M)]KK_	28.5571	3130.06	11383.9	13462.2	9622.66
KRT18	Homo sapiens	Keratin, type I cytoskeletal 18;Keratin, type I cytoskeletal 18	;K1C18_HUMAN	187;187	TRUE	_KVIDDTNITR_		7395.04	6490.27	11831.9	9377.38
KRT18	Homo sapiens	Keratin, type I cytoskeletal 18;Keratin, type I cytoskeletal 18	;K1C18_HUMAN	331;331	TRUE	_YALQMEQLNGILLHLESELAQTR_		2809.19	5347.36	12985.6	12293.1
KRT18	Homo sapiens	Keratin, type I cytoskeletal 18;Keratin, type I cytoskeletal 18	;K1C18_HUMAN	331;331	TRUE	_YALQM[Oxidation (M)]EQLNGILLHLESELAQTR_		2809.19	5347.36	12985.6	12293.1
KRT18	Homo sapiens	Keratin, type I cytoskeletal 18;Keratin, type I cytoskeletal 18	;K1C18_HUMAN	223;223	TRUE	_GLQAQIASSGLTVEVDAPK_		4940.72	5252.97	7900.16	12332.3
KRT18	Homo sapiens	Keratin, type I cytoskeletal 18;Keratin, type I cytoskeletal 18	;K1C18_HUMAN	373;373	TRUE	_LEAEIATYRR_		6459.62	7518.26	10161.4	5529.32
KRT18	Homo sapiens	Keratin, type I cytoskeletal 18;Keratin, type I cytoskeletal 18	;K1C18_HUMAN	56;56	TRUE	_GGMGSGGLATGIAGGLAGMGGIQNEK_	11.782	5751.94	4271.98	6026.62	7529.67
KRT18	Homo sapiens	Keratin, type I cytoskeletal 18;Keratin, type I cytoskeletal 18	;K1C18_HUMAN	56;56	TRUE	_GGM[Oxidation (M)]GSGGLATGIAGGLAGMGGIQNEK_	11.782	5751.94	4271.98	6026.62	7529.67
KRT18	Homo sapiens	Keratin, type I cytoskeletal 18;Keratin, type I cytoskeletal 18	;K1C18_HUMAN	56;56	TRUE	_GGMGSGGLATGIAGGLAGM[Oxidation (M)]GGIQNEK_	11.782	5751.94	4271.98	6026.62	7529.67
KRT18	Homo sapiens	Keratin, type I cytoskeletal 18;Keratin, type I cytoskeletal 18	;K1C18_HUMAN	100;100	TRUE	_SLETENR_		3142.85	3579.44	6547.37	4482.41
KRT18	Homo sapiens	Keratin, type I cytoskeletal 18;Keratin, type I cytoskeletal 18	;K1C18_HUMAN	215;215	TRUE	_KNHEEEVKGLQAQIASSGLTVEVDAPK_		3183.11	2739.38	6053.26	4799.94
KRT18	Homo sapiens	Keratin, type I cytoskeletal 18;Keratin, type I cytoskeletal 18	;K1C18_HUMAN	413;413	TRUE	_IVDGKVVSETNDTK_		2185.31	3066.58	3348.07	782.894
KRT18	Homo sapiens	Keratin, type I cytoskeletal 18;Keratin, type I cytoskeletal 18	;K1C18_HUMAN	132;132	TRUE	_IIEDLRAQIFANTVDNAR_		1847.39	3217.88	2532.43	1670.77
KRT18	Homo sapiens	Keratin, type I cytoskeletal 18;Keratin, type I cytoskeletal 18	;K1C18_HUMAN	216;216	TRUE	_NHEEEVKGLQAQIASSGLTVEVDAPKSQDLAK_		604.578	1889.3	1834.87	315.235
KRT18	Homo sapiens	Keratin, type I cytoskeletal 18;Keratin, type I cytoskeletal 18	;K1C18_HUMAN	418;418	TRUE	_VVSETNDTKVLRH_		831.979	1516.49	1669.15	166.313
KRT18	Homo sapiens	Keratin, type I cytoskeletal 18;Keratin, type I cytoskeletal 18	;K1C18_HUMAN	254;254	TRUE	_AQYDELARK_		665.626	720.759	1106.84	537.323
KRT18	Homo sapiens	Keratin, type I cytoskeletal 18;Keratin, type I cytoskeletal 18	;K1C18_HUMAN	315;315	TRUE	_NLKASLENSLREVEAR_		302.437	1431.54	915.119	299.643
KRT18	Homo sapiens	Keratin, type I cytoskeletal 18;Keratin, type I cytoskeletal 18	;K1C18_HUMAN	223;223	TRUE	_GLQAQIASSGLTVEVDAPKSQDLAK_		404.482	684.328	637.334	221.871
KRT18	Homo sapiens	Keratin, type I cytoskeletal 18;Keratin, type I cytoskeletal 18	;K1C18_HUMAN	412;412	TRUE	_RIVDGKVVSETNDTK_		401.169	574.184	599.262	28.6732
KRT18	Homo sapiens	Keratin, type I cytoskeletal 18;Keratin, type I cytoskeletal 18	;K1C18_HUMAN	418;418	TRUE	_VVSETNDTK_		137.507	243.941	490.449	368.859
KRT18	Homo sapiens	Keratin, type I cytoskeletal 18;Keratin, type I cytoskeletal 18	;K1C18_HUMAN	270;270	TRUE	_YWSQQIEESTTVVTTQSAEVGAAETTLTELRR_		138.925	157.49	313.174	441.965
KRT18	Homo sapiens	Keratin, type I cytoskeletal 18;Keratin, type I cytoskeletal 18	;K1C18_HUMAN	248;248	TRUE	_IMADIRAQYDELAR_		366.749	1244.7	844.723
KRT18	Homo sapiens	Keratin, type I cytoskeletal 18;Keratin, type I cytoskeletal 18	;K1C18_HUMAN	331;331	TRUE	_YALQMEQLNGILLHLESELAQTRAEGQR_			65.9682	175.463
KRT18	Homo sapiens	Keratin, type I cytoskeletal 18;Keratin, type I cytoskeletal 18	;K1C18_HUMAN	91;91	TRUE	_LASYLDRVR_					82.2667
KRT23	Homo sapiens	Keratin, type I cytoskeletal 23;Keratin, type I cytoskeletal 23	;K1C23_HUMAN	170;170	TRUE	_DLEIEVEGLRR_		915.325	3109.74	2365.48	1076.84
KRT23	Homo sapiens	Keratin, type I cytoskeletal 23;Keratin, type I cytoskeletal 23	;K1C23_HUMAN	309;309	TRUE	_SALENMLSETQSR_		1198.63	2532.63	1896.44	837.756
KRT23	Homo sapiens	Keratin, type I cytoskeletal 23;Keratin, type I cytoskeletal 23	;K1C23_HUMAN	309;309	TRUE	_SALENM[Oxidation (M)]LSETQSR_		1198.63	2532.63	1896.44	837.756
KRT23	Homo sapiens	Keratin, type I cytoskeletal 23;Keratin, type I cytoskeletal 23	;K1C23_HUMAN	43;43	TRUE	_ISLSFTTR_		828.8	2213.68	1963.4	990.364
KRT23	Homo sapiens	Keratin, type I cytoskeletal 23;Keratin, type I cytoskeletal 23	;K1C23_HUMAN	229;229	TRUE	_VDTGPREDLIK_		606.431	1593.98	1104.88	408.351
KRT23	Homo sapiens	Keratin, type I cytoskeletal 23;Keratin, type I cytoskeletal 23	;K1C23_HUMAN	181;181	TRUE	_TLDNLTIVTTDLEQEVEGM[Oxidation (M)]RK_		445.48	1126.5	667.294	534.751
KRT23	Homo sapiens	Keratin, type I cytoskeletal 23;Keratin, type I cytoskeletal 23	;K1C23_HUMAN	181;181	TRUE	_TLDNLTIVTTDLEQEVEGMRK_		445.48	1126.5	667.294	534.751
KRT23	Homo sapiens	Keratin, type I cytoskeletal 23;Keratin, type I cytoskeletal 23	;K1C23_HUMAN	240;240	TRUE	_VLEDMRQEYELIIK_		624.116	960.559	463.878	537.175
KRT23	Homo sapiens	Keratin, type I cytoskeletal 23;Keratin, type I cytoskeletal 23	;K1C23_HUMAN	138;138	TRUE	_MTNAQIILLIDNAR_		312.694	844.076	730.223	343.071
KRT23	Homo sapiens	Keratin, type I cytoskeletal 23;Keratin, type I cytoskeletal 23	;K1C23_HUMAN	138;138	TRUE	_M[Oxidation (M)]TNAQIILLIDNAR_		312.694	844.076	730.223	343.071
KRT23	Homo sapiens	Keratin, type I cytoskeletal 23;Keratin, type I cytoskeletal 23	;K1C23_HUMAN	350;350	TRUE	_QNNEYQVLLGIK_		292.607	715.816	736.799	320.059
KRT23	Homo sapiens	Keratin, type I cytoskeletal 23;Keratin, type I cytoskeletal 23	;K1C23_HUMAN	92;92	TRUE	_ALEEANM[Oxidation (M)]KLESR_		363.458	754.577	463.857	133.451
KRT23	Homo sapiens	Keratin, type I cytoskeletal 23;Keratin, type I cytoskeletal 23	;K1C23_HUMAN	92;92	TRUE	_ALEEANMKLESR_		363.458	754.577	463.857	133.451
KRT23	Homo sapiens	Keratin, type I cytoskeletal 23;Keratin, type I cytoskeletal 23	;K1C23_HUMAN	117;117	TRUE	_KDYSQYEENITHLQEQIVDGK_		279.271	598.87	367.359	311.336
KRT23	Homo sapiens	Keratin, type I cytoskeletal 23;Keratin, type I cytoskeletal 23	;K1C23_HUMAN	374;374	TRUE	_LLEGESEGTREESK_		113.745	647.702	323.934	81.7839
KRT23	Homo sapiens	Keratin, type I cytoskeletal 23;Keratin, type I cytoskeletal 23	;K1C23_HUMAN	152;152	TRUE	_MAVDDFNLK_		158.845	284.567	404.699	105.469
KRT23	Homo sapiens	Keratin, type I cytoskeletal 23;Keratin, type I cytoskeletal 23	;K1C23_HUMAN	118;118	TRUE	_DYSQYEENITHLQEQIVDGK_		68.6602	329.925	149.98	124.979
KRT23	Homo sapiens	Keratin, type I cytoskeletal 23;Keratin, type I cytoskeletal 23	;K1C23_HUMAN	326;326	TRUE	_LQDMQEIISHYEEELTQLR_		20.6835	175.108	97.0155	170.879
KRT23	Homo sapiens	Keratin, type I cytoskeletal 23;Keratin, type I cytoskeletal 23	;K1C23_HUMAN	181;181	TRUE	_TLDNLTIVTTDLEQEVEGMR_		15.9186	55.7407	28.2531	46.4469
KRT23	Homo sapiens	Keratin, type I cytoskeletal 23;Keratin, type I cytoskeletal 23	;K1C23_HUMAN	107;107	TRUE	_WHQQRDPGSK_		38.8905	89.7789
KRT23	Homo sapiens	Keratin, type I cytoskeletal 23;Keratin, type I cytoskeletal 23	;K1C23_HUMAN	217;217	TRUE	_HHVPSDFNVNVK_			159.604	69.8848
KRT9	Homo sapiens	Keratin, type I cytoskeletal 9;Keratin, type I cytoskeletal 9	;K1C9_HUMAN	375;375	TRUE	_HGVQELEIELQSQLSK_	567.864	46598.7	207396	179339	46016.1
KRT9	Homo sapiens	Keratin, type I cytoskeletal 9;Keratin, type I cytoskeletal 9	;K1C9_HUMAN	64;64	TRUE	_GGGGSFGYSYGGGSGGGFSASSLGGGFGGGSR_	3229.49	58986.2	182885	162365	57300.4
KRT9	Homo sapiens	Keratin, type I cytoskeletal 9;Keratin, type I cytoskeletal 9	;K1C9_HUMAN	291;291	TRUE	_NHKEEMSQLTGQNSGDVNVEINVAPGKDLTK_	1218.8	4683.85	65463.2	54494.3	15114.1
KRT9	Homo sapiens	Keratin, type I cytoskeletal 9;Keratin, type I cytoskeletal 9	;K1C9_HUMAN	291;291	TRUE	_NHKEEM[Oxidation (M)]SQLTGQNSGDVNVEINVAPGKDLTK_	1218.8	4683.85	65463.2	54494.3	15114.1
KRT9	Homo sapiens	Keratin, type I cytoskeletal 9;Keratin, type I cytoskeletal 9	;K1C9_HUMAN	291;291	TRUE	_NHKEEMSQLTGQNSGDVNVEINVAPGK_	488.383	1551.23	10474.4	9091.5	6055.36
KRT9	Homo sapiens	Keratin, type I cytoskeletal 9;Keratin, type I cytoskeletal 9	;K1C9_HUMAN	291;291	TRUE	_NHKEEM[Oxidation (M)]SQLTGQNSGDVNVEINVAPGK_	488.383	1551.23	10474.4	9091.5	6055.36
KRT9	Homo sapiens	Keratin, type I cytoskeletal 9;Keratin, type I cytoskeletal 9	;K1C9_HUMAN	428;428	TRUE	_QEIEC[Carbamidomethyl (C)]QNQEYSLLLSIK_	26.0656	188.258	4357.51	461.09	376.873
KRT9	Homo sapiens	Keratin, type I cytoskeletal 9;Keratin, type I cytoskeletal 9	;K1C9_HUMAN	225;225	TRUE	_TLLDIDNTR_		465002	1.54348e+06	1.80018e+06	352189
KRT9	Homo sapiens	Keratin, type I cytoskeletal 9;Keratin, type I cytoskeletal 9	;K1C9_HUMAN	251;251	TRUE	_QGVDADINGLR_		231509	802352	911855	212065
KRT9	Homo sapiens	Keratin, type I cytoskeletal 9;Keratin, type I cytoskeletal 9	;K1C9_HUMAN	234;234	TRUE	_MTLDDFR_		245613	688187	795570	188363
KRT9	Homo sapiens	Keratin, type I cytoskeletal 9;Keratin, type I cytoskeletal 9	;K1C9_HUMAN	234;234	TRUE	_M[Oxidation (M)]TLDDFR_		245613	688187	795570	188363
KRT9	Homo sapiens	Keratin, type I cytoskeletal 9;Keratin, type I cytoskeletal 9	;K1C9_HUMAN	322;322	TRUE	_TLNDMRQEYEQLIAK_		234698	882007	598100	153732
KRT9	Homo sapiens	Keratin, type I cytoskeletal 9;Keratin, type I cytoskeletal 9	;K1C9_HUMAN	322;322	TRUE	_TLNDM[Oxidation (M)]RQEYEQLIAK_		234698	882007	598100	153732
KRT9	Homo sapiens	Keratin, type I cytoskeletal 9;Keratin, type I cytoskeletal 9	;K1C9_HUMAN	155;155	TRUE	_STMQELNSR_		188151	530672	621928	145092
KRT9	Homo sapiens	Keratin, type I cytoskeletal 9;Keratin, type I cytoskeletal 9	;K1C9_HUMAN	155;155	TRUE	_STM[Oxidation (M)]QELNSR_		188151	530672	621928	145092
KRT9	Homo sapiens	Keratin, type I cytoskeletal 9;Keratin, type I cytoskeletal 9	;K1C9_HUMAN	241;241	TRUE	_IKFEMEQNLR_	36.5706	151882	544639	639519	132812
KRT9	Homo sapiens	Keratin, type I cytoskeletal 9;Keratin, type I cytoskeletal 9	;K1C9_HUMAN	241;241	TRUE	_IKFEM[Oxidation (M)]EQNLR_	36.5706	151882	544639	639519	132812
KRT9	Homo sapiens	Keratin, type I cytoskeletal 9;Keratin, type I cytoskeletal 9	;K1C9_HUMAN	450;450	TRUE	_EIETYHNLLEGGQEDFESSGAGK_	270.332	49347.4	404781	219947	57217.6
KRT9	Homo sapiens	Keratin, type I cytoskeletal 9;Keratin, type I cytoskeletal 9	;K1C9_HUMAN	14;14	TRUE	_SGGGGGGGLGSGGSIR_	37.2188	74675.2	289445	263038	60297.9
KRT9	Homo sapiens	Keratin, type I cytoskeletal 9;Keratin, type I cytoskeletal 9	;K1C9_HUMAN	47;47	TRUE	_FSSSSGYGGGSSR_		82011	251412	271180	65867.8
KRT9	Homo sapiens	Keratin, type I cytoskeletal 9;Keratin, type I cytoskeletal 9	;K1C9_HUMAN	262;262	TRUE	_QVLDNLTM[Oxidation (M)]EK_		47331.7	191607	243634	51913.2
KRT9	Homo sapiens	Keratin, type I cytoskeletal 9;Keratin, type I cytoskeletal 9	;K1C9_HUMAN	262;262	TRUE	_QVLDNLTMEK_		47331.7	191607	243634	51913.2
KRT9	Homo sapiens	Keratin, type I cytoskeletal 9;Keratin, type I cytoskeletal 9	;K1C9_HUMAN	200;200	TRUE	_NYSPYYNTIDDLKDQIVDLTVGNNK_	65.4924	38908.9	241064	170099	40927.4
KRT9	Homo sapiens	Keratin, type I cytoskeletal 9;Keratin, type I cytoskeletal 9	;K1C9_HUMAN	5;5	TRUE	_QFSSSYLSR_		23376.4	122781	98196.6	20551.2
KRT9	Homo sapiens	Keratin, type I cytoskeletal 9;Keratin, type I cytoskeletal 9	;K1C9_HUMAN	375;375	TRUE	_HGVQELEIELQSQLSKK_	88.5526	21749.7	110095	91599	21485.4
KRT9	Homo sapiens	Keratin, type I cytoskeletal 9;Keratin, type I cytoskeletal 9	;K1C9_HUMAN	337;337	TRUE	_NRKDIENQYETQITQIEHEVSSSGQEVQSSAK_		32888.4	127566	66108.4	13632.2
KRT9	Homo sapiens	Keratin, type I cytoskeletal 9;Keratin, type I cytoskeletal 9	;K1C9_HUMAN	328;328	TRUE	_QEYEQLIAK_		25739.1	66602.5	91465.3	21397.1
KRT9	Homo sapiens	Keratin, type I cytoskeletal 9;Keratin, type I cytoskeletal 9	;K1C9_HUMAN	243;243	TRUE	_FEMEQNLR_		25097.3	72754.9	83740.8	22767.9
KRT9	Homo sapiens	Keratin, type I cytoskeletal 9;Keratin, type I cytoskeletal 9	;K1C9_HUMAN	243;243	TRUE	_FEM[Oxidation (M)]EQNLR_		25097.3	72754.9	83740.8	22767.9
KRT9	Homo sapiens	Keratin, type I cytoskeletal 9;Keratin, type I cytoskeletal 9	;K1C9_HUMAN	447;447	TRUE	_LEKEIETYHNLLEGGQEDFESSGAGK_		16601.9	93577.2	63753.7	15849.3
KRT9	Homo sapiens	Keratin, type I cytoskeletal 9;Keratin, type I cytoskeletal 9	;K1C9_HUMAN	164;164	TRUE	_LASYLDKVQALEEANNDLENK_		21319.4	63882.1	60886.7	19413.6
KRT9	Homo sapiens	Keratin, type I cytoskeletal 9;Keratin, type I cytoskeletal 9	;K1C9_HUMAN	491;491	TRUE	_GGSGGSYGGGGSGGGYGGGSGSR_		19040.3	55987.8	64967.7	14570.1
KRT9	Homo sapiens	Keratin, type I cytoskeletal 9;Keratin, type I cytoskeletal 9	;K1C9_HUMAN	171;171	TRUE	_VQALEEANNDLENK_	1.94081	13559.8	42452.2	57779.7	19802.4
KRT9	Homo sapiens	Keratin, type I cytoskeletal 9;Keratin, type I cytoskeletal 9	;K1C9_HUMAN	185;185	TRUE	_IQDWYDK_		10679.3	45818.7	49551	12358.2
KRT9	Homo sapiens	Keratin, type I cytoskeletal 9;Keratin, type I cytoskeletal 9	;K1C9_HUMAN	272;272	TRUE	_SDLEMQYETLQEELMALKK_	56.7799	6139.55	50001.3	39703.6	11805.3
KRT9	Homo sapiens	Keratin, type I cytoskeletal 9;Keratin, type I cytoskeletal 9	;K1C9_HUMAN	272;272	TRUE	_SDLEM[Oxidation (M)]QYETLQEELM[Oxidation (M)]ALKK_	56.7799	6139.55	50001.3	39703.6	11805.3
KRT9	Homo sapiens	Keratin, type I cytoskeletal 9;Keratin, type I cytoskeletal 9	;K1C9_HUMAN	272;272	TRUE	_SDLEMQYETLQEELM[Oxidation (M)]ALKK_	56.7799	6139.55	50001.3	39703.6	11805.3
KRT9	Homo sapiens	Keratin, type I cytoskeletal 9;Keratin, type I cytoskeletal 9	;K1C9_HUMAN	272;272	TRUE	_SDLEM[Oxidation (M)]QYETLQEELMALKK_	56.7799	6139.55	50001.3	39703.6	11805.3
KRT9	Homo sapiens	Keratin, type I cytoskeletal 9;Keratin, type I cytoskeletal 9	;K1C9_HUMAN	171;171	TRUE	_VQALEEANNDLENKIQDWYDK_		6291.45	47599.5	40876.3	10226.1
KRT9	Homo sapiens	Keratin, type I cytoskeletal 9;Keratin, type I cytoskeletal 9	;K1C9_HUMAN	339;339	TRUE	_KDIENQYETQITQIEHEVSSSGQEVQSSAK_		10052.9	41870.8	30775.8	8098.01
KRT9	Homo sapiens	Keratin, type I cytoskeletal 9;Keratin, type I cytoskeletal 9	;K1C9_HUMAN	171;171	TRUE	_VQALEEANNDLENKIQDWYDKK_		6274.56	35345.1	34651.3	9128.96
KRT9	Homo sapiens	Keratin, type I cytoskeletal 9;Keratin, type I cytoskeletal 9	;K1C9_HUMAN	473;473	TRUE	_IGLGGRGGSGGSYGR_		26934.9	19504.1	14904.9	19233.8
KRT9	Homo sapiens	Keratin, type I cytoskeletal 9;Keratin, type I cytoskeletal 9	;K1C9_HUMAN	445;445	TRUE	_M[Oxidation (M)]RLEKEIETYHNLLEGGQEDFESSGAGK_		7517.03	41627.8	16849	3073.06
KRT9	Homo sapiens	Keratin, type I cytoskeletal 9;Keratin, type I cytoskeletal 9	;K1C9_HUMAN	445;445	TRUE	_MRLEKEIETYHNLLEGGQEDFESSGAGK_		7517.03	41627.8	16849	3073.06
KRT9	Homo sapiens	Keratin, type I cytoskeletal 9;Keratin, type I cytoskeletal 9	;K1C9_HUMAN	225;225	TRUE	_TLLDIDNTRM[Oxidation (M)]TLDDFR_		10287.8	35302.8	5314.68	3721.26
KRT9	Homo sapiens	Keratin, type I cytoskeletal 9;Keratin, type I cytoskeletal 9	;K1C9_HUMAN	225;225	TRUE	_TLLDIDNTRMTLDDFR_		10287.8	35302.8	5314.68	3721.26
KRT9	Homo sapiens	Keratin, type I cytoskeletal 9;Keratin, type I cytoskeletal 9	;K1C9_HUMAN	164;164	TRUE	_LASYLDKVQALEEANNDLENKIQDWYDK_		3185.03	24673	20586.9	4247.1
KRT9	Homo sapiens	Keratin, type I cytoskeletal 9;Keratin, type I cytoskeletal 9	;K1C9_HUMAN	340;340	TRUE	_DIENQYETQITQIEHEVSSSGQEVQSSAK_		4183.95	23228.4	16092	3352.88
KRT9	Homo sapiens	Keratin, type I cytoskeletal 9;Keratin, type I cytoskeletal 9	;K1C9_HUMAN	262;262	TRUE	_QVLDNLTM[Oxidation (M)]EKSDLEM[Oxidation (M)]QYETLQEELM[Oxidation (M)]ALKK_		928.054	20908.8	11824.5	1697.06
KRT9	Homo sapiens	Keratin, type I cytoskeletal 9;Keratin, type I cytoskeletal 9	;K1C9_HUMAN	262;262	TRUE	_QVLDNLTMEKSDLEMQYETLQEELMALKK_		928.054	20908.8	11824.5	1697.06
KRT9	Homo sapiens	Keratin, type I cytoskeletal 9;Keratin, type I cytoskeletal 9	;K1C9_HUMAN	262;262	TRUE	_QVLDNLTM[Oxidation (M)]EKSDLEMQYETLQEELMALKK_		928.054	20908.8	11824.5	1697.06
KRT9	Homo sapiens	Keratin, type I cytoskeletal 9;Keratin, type I cytoskeletal 9	;K1C9_HUMAN	262;262	TRUE	_QVLDNLTMEKSDLEMQYETLQEELM[Oxidation (M)]ALKK_		928.054	20908.8	11824.5	1697.06
KRT9	Homo sapiens	Keratin, type I cytoskeletal 9;Keratin, type I cytoskeletal 9	;K1C9_HUMAN	262;262	TRUE	_QVLDNLTM[Oxidation (M)]EKSDLEM[Oxidation (M)]QYETLQEELMALKK_		928.054	20908.8	11824.5	1697.06
KRT9	Homo sapiens	Keratin, type I cytoskeletal 9;Keratin, type I cytoskeletal 9	;K1C9_HUMAN	262;262	TRUE	_QVLDNLTMEKSDLEM[Oxidation (M)]QYETLQEELMALKK_		928.054	20908.8	11824.5	1697.06
KRT9	Homo sapiens	Keratin, type I cytoskeletal 9;Keratin, type I cytoskeletal 9	;K1C9_HUMAN	262;262	TRUE	_QVLDNLTM[Oxidation (M)]EKSDLEMQYETLQEELM[Oxidation (M)]ALKK_		928.054	20908.8	11824.5	1697.06
KRT9	Homo sapiens	Keratin, type I cytoskeletal 9;Keratin, type I cytoskeletal 9	;K1C9_HUMAN	262;262	TRUE	_QVLDNLTMEKSDLEM[Oxidation (M)]QYETLQEELM[Oxidation (M)]ALKK_		928.054	20908.8	11824.5	1697.06
KRT9	Homo sapiens	Keratin, type I cytoskeletal 9;Keratin, type I cytoskeletal 9	;K1C9_HUMAN	272;272	TRUE	_SDLEMQYETLQEELMALK_	20.1476	1116.97	11161.9	8470.2	2214.84
KRT9	Homo sapiens	Keratin, type I cytoskeletal 9;Keratin, type I cytoskeletal 9	;K1C9_HUMAN	272;272	TRUE	_SDLEM[Oxidation (M)]QYETLQEELM[Oxidation (M)]ALK_	20.1476	1116.97	11161.9	8470.2	2214.84
KRT9	Homo sapiens	Keratin, type I cytoskeletal 9;Keratin, type I cytoskeletal 9	;K1C9_HUMAN	272;272	TRUE	_SDLEM[Oxidation (M)]QYETLQEELMALK_	20.1476	1116.97	11161.9	8470.2	2214.84
KRT9	Homo sapiens	Keratin, type I cytoskeletal 9;Keratin, type I cytoskeletal 9	;K1C9_HUMAN	272;272	TRUE	_SDLEMQYETLQEELM[Oxidation (M)]ALK_	20.1476	1116.97	11161.9	8470.2	2214.84
KRT9	Homo sapiens	Keratin, type I cytoskeletal 9;Keratin, type I cytoskeletal 9	;K1C9_HUMAN	185;185	TRUE	_IQDWYDKK_		1197.03	4297.76	5806.81	1931.92
KRT9	Homo sapiens	Keratin, type I cytoskeletal 9;Keratin, type I cytoskeletal 9	;K1C9_HUMAN	35;35	TRUE	_FSSSGGGGGGGR_		787.049	5443.9	4377.74	1015.1
KRT9	Homo sapiens	Keratin, type I cytoskeletal 9;Keratin, type I cytoskeletal 9	;K1C9_HUMAN	213;213	TRUE	_DQIVDLTVGNNK_		1051.86	2512.79	3297.45	2187.73
KRT9	Homo sapiens	Keratin, type I cytoskeletal 9;Keratin, type I cytoskeletal 9	;K1C9_HUMAN	251;251	TRUE	_QGVDADINGLRQVLDNLTMEK_		874.748	5709.65	1799.98	267.14
KRT9	Homo sapiens	Keratin, type I cytoskeletal 9;Keratin, type I cytoskeletal 9	;K1C9_HUMAN	251;251	TRUE	_QGVDADINGLRQVLDNLTM[Oxidation (M)]EK_		874.748	5709.65	1799.98	267.14
KRT9	Homo sapiens	Keratin, type I cytoskeletal 9;Keratin, type I cytoskeletal 9	;K1C9_HUMAN	35;35	TRUE	_FSSSGGGGGGGRFSSSSGYGGGSSR_		2673.39	2160.72	840.831	2092.7
KRT9	Homo sapiens	Keratin, type I cytoskeletal 9;Keratin, type I cytoskeletal 9	;K1C9_HUMAN	200;200	TRUE	_NYSPYYNTIDDLK_		507.157	1810.42	3123.73	1216.21
KRT9	Homo sapiens	Keratin, type I cytoskeletal 9;Keratin, type I cytoskeletal 9	;K1C9_HUMAN	185;185	TRUE	_IQDWYDKKGPAAIQK_		568.855	3172.01	1470.97	228.355
KRT9	Homo sapiens	Keratin, type I cytoskeletal 9;Keratin, type I cytoskeletal 9	;K1C9_HUMAN	580;580	TRUE	_GGSGGSHGGGSGFGGESGGSYGGGEEASGSGGGYGGGSGK_		235.325	1440.8	987.814	115.877
KRT9	Homo sapiens	Keratin, type I cytoskeletal 9;Keratin, type I cytoskeletal 9	;K1C9_HUMAN	488;488	TRUE	_GSRGGSGGSYGGGGSGGGYGGGSGSR_		761.062	841.189	534.192	596.838
KRT9	Homo sapiens	Keratin, type I cytoskeletal 9;Keratin, type I cytoskeletal 9	;K1C9_HUMAN	375;375	TRUE	_HGVQELEIELQSQLSKKAALEK_		160.585	1162.71	515.521	206.999
KRT9	Homo sapiens	Keratin, type I cytoskeletal 9;Keratin, type I cytoskeletal 9	;K1C9_HUMAN	339;339	TRUE	_KDIENQYETQITQIEHEVSSSGQEVQSSAKEVTQLR_		216.832	889.67	226.43	95.8957
KRT9	Homo sapiens	Keratin, type I cytoskeletal 9;Keratin, type I cytoskeletal 9	;K1C9_HUMAN	241;241	TRUE	_IKFEM[Oxidation (M)]EQNLRQGVDADINGLR_		142.783	870.068	106.095	164.721
KRT9	Homo sapiens	Keratin, type I cytoskeletal 9;Keratin, type I cytoskeletal 9	;K1C9_HUMAN	193;193	TRUE	_GPAAIQKNYSPYYNTIDDLKDQIVDLTVGNNK_		31.6443	366.067	414.3	131.448
KRT9	Homo sapiens	Keratin, type I cytoskeletal 9;Keratin, type I cytoskeletal 9	;K1C9_HUMAN	294;294	TRUE	_EEMSQLTGQNSGDVNVEINVAPGK_		39.1473	418.745	284.801	91.4987
KRT9	Homo sapiens	Keratin, type I cytoskeletal 9;Keratin, type I cytoskeletal 9	;K1C9_HUMAN	369;369	TRUE	_EVTQLRHGVQELEIELQSQLSK_		101.365	173.633	213.366	47.9752
KRT9	Homo sapiens	Keratin, type I cytoskeletal 9;Keratin, type I cytoskeletal 9	;K1C9_HUMAN	397;397	TRUE	_SLEDTKNR_		29.1681	225.092	158.078	12.7414
KRT9	Homo sapiens	Keratin, type I cytoskeletal 9;Keratin, type I cytoskeletal 9	;K1C9_HUMAN	30;30	TRUE	_SSYSRFSSSGGGGGGGR_		47.9536	117.952	158.458	38.5235
KRT9	Homo sapiens	Keratin, type I cytoskeletal 9;Keratin, type I cytoskeletal 9	;K1C9_HUMAN	234;234	TRUE	_M[Oxidation (M)]TLDDFRIK_		1104.32	5455.6	1579.44	355.563
KRT9	Homo sapiens	Keratin, type I cytoskeletal 9;Keratin, type I cytoskeletal 9	;K1C9_HUMAN	234;234	TRUE	_MTLDDFRIK_		1104.32	5455.6	1579.44	355.563
KRT9	Homo sapiens	Keratin, type I cytoskeletal 9;Keratin, type I cytoskeletal 9	;K1C9_HUMAN	405;405	TRUE	_YC[Carbamidomethyl (C)]GQLQM[Oxidation (M)]IQEQISNLEAQITDVR_		240.883	4635.35	308.275	393.668
KRT9	Homo sapiens	Keratin, type I cytoskeletal 9;Keratin, type I cytoskeletal 9	;K1C9_HUMAN	405;405	TRUE	_YC[Carbamidomethyl (C)]GQLQMIQEQISNLEAQITDVR_		240.883	4635.35	308.275	393.668
KRT9	Homo sapiens	Keratin, type I cytoskeletal 9;Keratin, type I cytoskeletal 9	;K1C9_HUMAN	262;262	TRUE	_QVLDNLTMEKSDLEM[Oxidation (M)]QYETLQEELM[Oxidation (M)]ALK_		25.6095	887.748	1099.69	275.285
KRT9	Homo sapiens	Keratin, type I cytoskeletal 9;Keratin, type I cytoskeletal 9	;K1C9_HUMAN	262;262	TRUE	_QVLDNLTM[Oxidation (M)]EKSDLEM[Oxidation (M)]QYETLQEELMALK_		25.6095	887.748	1099.69	275.285
KRT9	Homo sapiens	Keratin, type I cytoskeletal 9;Keratin, type I cytoskeletal 9	;K1C9_HUMAN	262;262	TRUE	_QVLDNLTMEKSDLEMQYETLQEELMALK_		25.6095	887.748	1099.69	275.285
KRT9	Homo sapiens	Keratin, type I cytoskeletal 9;Keratin, type I cytoskeletal 9	;K1C9_HUMAN	262;262	TRUE	_QVLDNLTMEKSDLEM[Oxidation (M)]QYETLQEELMALK_		25.6095	887.748	1099.69	275.285
KRT9	Homo sapiens	Keratin, type I cytoskeletal 9;Keratin, type I cytoskeletal 9	;K1C9_HUMAN	262;262	TRUE	_QVLDNLTM[Oxidation (M)]EKSDLEM[Oxidation (M)]QYETLQEELM[Oxidation (M)]ALK_		25.6095	887.748	1099.69	275.285
KRT9	Homo sapiens	Keratin, type I cytoskeletal 9;Keratin, type I cytoskeletal 9	;K1C9_HUMAN	262;262	TRUE	_QVLDNLTM[Oxidation (M)]EKSDLEMQYETLQEELMALK_		25.6095	887.748	1099.69	275.285
KRT9	Homo sapiens	Keratin, type I cytoskeletal 9;Keratin, type I cytoskeletal 9	;K1C9_HUMAN	580;580	TRUE	_GGSGGSHGGGSGFGGESGGSYGGGEEASGSGGGYGGGSGKSSHS_		430.487	794.914	689.652
KRT9	Homo sapiens	Keratin, type I cytoskeletal 9;Keratin, type I cytoskeletal 9	;K1C9_HUMAN	450;450	TRUE	_EIETYHNLLEGGQEDFESSGAGKIGLGGR_		231.252	675.882	728.789
KRT9	Homo sapiens	Keratin, type I cytoskeletal 9;Keratin, type I cytoskeletal 9	;K1C9_HUMAN	479;479	TRUE	_GGSGGSYGR_		27.495	218.053	186.515
KRT9	Homo sapiens	Keratin, type I cytoskeletal 9;Keratin, type I cytoskeletal 9	;K1C9_HUMAN	234;234	TRUE	_MTLDDFRIKFEMEQNLR_			95.4738	129.236	115.058
KRT9	Homo sapiens	Keratin, type I cytoskeletal 9;Keratin, type I cytoskeletal 9	;K1C9_HUMAN	192;192	TRUE	_KGPAAIQK_			117.583	30.7673	8.30092
KRT9	Homo sapiens	Keratin, type I cytoskeletal 9;Keratin, type I cytoskeletal 9	;K1C9_HUMAN	405;405	TRUE	_YC[Carbamidomethyl (C)]GQLQM[Oxidation (M)]IQEQISNLEAQITDVRQEIEC[Carbamidomethyl (C)]QNQEYSLLLSIK_			206.485
KRT2	Homo sapiens	Keratin, type II cytoskeletal 2 epidermal;Keratin, type II cytoskeletal 2 epidermal	;K22E_HUMAN	363;363	TRUE	_SKEEAEALYHSKYEELQVTVGR_	77.403	21593.5	63743.4	37996.4	25151.3
KRT2	Homo sapiens	Keratin, type II cytoskeletal 2 epidermal;Keratin, type II cytoskeletal 2 epidermal	;K22E_HUMAN	315;315	TRUE	_VLYDAEISQIHQSVTDTNVILSMDNSR_	4590.38	14472.6	34216	20594.9	20898
KRT2	Homo sapiens	Keratin, type II cytoskeletal 2 epidermal;Keratin, type II cytoskeletal 2 epidermal	;K22E_HUMAN	315;315	TRUE	_VLYDAEISQIHQSVTDTNVILSM[Oxidation (M)]DNSR_	4590.38	14472.6	34216	20594.9	20898
KRT2	Homo sapiens	Keratin, type II cytoskeletal 2 epidermal;Keratin, type II cytoskeletal 2 epidermal	;K22E_HUMAN	71;71	TRUE	_SISISVAGGGGGFGAAGGFGGR_	499.476	13000.1	29753.5	13568.7	13159.7
KRT2	Homo sapiens	Keratin, type II cytoskeletal 2 epidermal;Keratin, type II cytoskeletal 2 epidermal	;K22E_HUMAN	210;210	TRUE	_WELLQQM[Oxidation (M)]NVGTRPINLEPIFQGYIDSLKR_	52.8763	1916.51	18289.8	14505	16514.6
KRT2	Homo sapiens	Keratin, type II cytoskeletal 2 epidermal;Keratin, type II cytoskeletal 2 epidermal	;K22E_HUMAN	210;210	TRUE	_WELLQQMNVGTRPINLEPIFQGYIDSLKR_	52.8763	1916.51	18289.8	14505	16514.6
KRT2	Homo sapiens	Keratin, type II cytoskeletal 2 epidermal;Keratin, type II cytoskeletal 2 epidermal	;K22E_HUMAN	93;93	TRUE	_GGGFGGGSSFGGGSGFSGGGFGGGGFGGGR_	708.799	8168.83	18408.7	13148	10378.7
KRT2	Homo sapiens	Keratin, type II cytoskeletal 2 epidermal;Keratin, type II cytoskeletal 2 epidermal	;K22E_HUMAN	491;491	TRUE	_MSGDLSSNVTVSVTSSTISSNVASK_	378.635	5929.55	16491.5	8553.98	6516.58
KRT2	Homo sapiens	Keratin, type II cytoskeletal 2 epidermal;Keratin, type II cytoskeletal 2 epidermal	;K22E_HUMAN	491;491	TRUE	_M[Oxidation (M)]SGDLSSNVTVSVTSSTISSNVASK_	378.635	5929.55	16491.5	8553.98	6516.58
KRT2	Homo sapiens	Keratin, type II cytoskeletal 2 epidermal;Keratin, type II cytoskeletal 2 epidermal	;K22E_HUMAN	13;13	TRUE	_GGGGGGFRGFSSGSAVVSGGSR_	22.6219	2240.12	5035.15	2252.14	1180.35
KRT2	Homo sapiens	Keratin, type II cytoskeletal 2 epidermal;Keratin, type II cytoskeletal 2 epidermal	;K22E_HUMAN	297;297	TRUE	_VELQSKVDLLNQEIEFLK_	48.5398	1549.54	4571.24	1990.46	538.891
KRT2	Homo sapiens	Keratin, type II cytoskeletal 2 epidermal;Keratin, type II cytoskeletal 2 epidermal	;K22E_HUMAN	288;288	TRUE	_DVDNAYMIKVELQSKVDLLNQEIEFLK_	10.1895	45.2467	162.008	167.875	62.2329
KRT2	Homo sapiens	Keratin, type II cytoskeletal 2 epidermal;Keratin, type II cytoskeletal 2 epidermal	;K22E_HUMAN	198;198	FALSE	_FLEQQNQVLQTK_	57.1739	352147	1343664	1.21387e+06	443899
KRT2	Homo sapiens	Keratin, type II cytoskeletal 2 epidermal;Keratin, type II cytoskeletal 2 epidermal	;K22E_HUMAN	394;394	FALSE	_IEISELNR_		272535	1290420	968409	300519
KRT2	Homo sapiens	Keratin, type II cytoskeletal 2 epidermal;Keratin, type II cytoskeletal 2 epidermal	;K22E_HUMAN	239;239	TRUE	_YLDGLTAER_		151319	356119	208574	169463
KRT2	Homo sapiens	Keratin, type II cytoskeletal 2 epidermal;Keratin, type II cytoskeletal 2 epidermal	;K22E_HUMAN	62;62	TRUE	_SLVGLGGTK_		133325	242648	152246	113213
KRT2	Homo sapiens	Keratin, type II cytoskeletal 2 epidermal;Keratin, type II cytoskeletal 2 epidermal	;K22E_HUMAN	167;167	TRUE	_VDPEIQNVK_		113494	230732	138411	113955
KRT2	Homo sapiens	Keratin, type II cytoskeletal 2 epidermal;Keratin, type II cytoskeletal 2 epidermal	;K22E_HUMAN	303;303	TRUE	_VDLLNQEIEFLK_	21.8642	77725.3	190687	74236.5	87257.3
KRT2	Homo sapiens	Keratin, type II cytoskeletal 2 epidermal;Keratin, type II cytoskeletal 2 epidermal	;K22E_HUMAN	276;276	TRUE	_TAAENDFVTLKK_		72808.3	188054	89881.4	65657.2
KRT2	Homo sapiens	Keratin, type II cytoskeletal 2 epidermal;Keratin, type II cytoskeletal 2 epidermal	;K22E_HUMAN	21;21	TRUE	_GFSSGSAVVSGGSR_		63568.6	141570	84246.9	67822.1
KRT2	Homo sapiens	Keratin, type II cytoskeletal 2 epidermal;Keratin, type II cytoskeletal 2 epidermal	;K22E_HUMAN	462;462	FALSE	_DYQELMNVK_		47358.2	140210	64536.1	63578.5
KRT2	Homo sapiens	Keratin, type II cytoskeletal 2 epidermal;Keratin, type II cytoskeletal 2 epidermal	;K22E_HUMAN	462;462	FALSE	_DYQELM[Oxidation (M)]NVK_		47358.2	140210	64536.1	63578.5
KRT2	Homo sapiens	Keratin, type II cytoskeletal 2 epidermal;Keratin, type II cytoskeletal 2 epidermal	;K22E_HUMAN	46;46	TRUE	_HGGGGGGFGGGGFGSR_	31.0374	61487.8	113870	69930.1	52876
KRT2	Homo sapiens	Keratin, type II cytoskeletal 2 epidermal;Keratin, type II cytoskeletal 2 epidermal	;K22E_HUMAN	276;276	TRUE	_TAAENDFVTLK_		47668	100137	63575.6	58531.8
KRT2	Homo sapiens	Keratin, type II cytoskeletal 2 epidermal;Keratin, type II cytoskeletal 2 epidermal	;K22E_HUMAN	288;288	TRUE	_DVDNAYMIK_		39845	117667	55974.7	55797.6
KRT2	Homo sapiens	Keratin, type II cytoskeletal 2 epidermal;Keratin, type II cytoskeletal 2 epidermal	;K22E_HUMAN	288;288	TRUE	_DVDNAYM[Oxidation (M)]IK_		39845	117667	55974.7	55797.6
KRT2	Homo sapiens	Keratin, type II cytoskeletal 2 epidermal;Keratin, type II cytoskeletal 2 epidermal	;K22E_HUMAN	375;375	TRUE	_YEELQVTVGR_	32.6787	32990	89100.9	53215.8	61938.1
KRT2	Homo sapiens	Keratin, type II cytoskeletal 2 epidermal;Keratin, type II cytoskeletal 2 epidermal	;K22E_HUMAN	419;419	TRUE	_NVQDAIADAEQRGEHALKDAR_		24671.9	115035	43887.7	34596.4
KRT2	Homo sapiens	Keratin, type II cytoskeletal 2 epidermal;Keratin, type II cytoskeletal 2 epidermal	;K22E_HUMAN	459;459	FALSE	_LLRDYQELMNVK_		28295.3	101552	42856.4	28523.1
KRT2	Homo sapiens	Keratin, type II cytoskeletal 2 epidermal;Keratin, type II cytoskeletal 2 epidermal	;K22E_HUMAN	459;459	FALSE	_LLRDYQELM[Oxidation (M)]NVK_		28295.3	101552	42856.4	28523.1
KRT2	Homo sapiens	Keratin, type II cytoskeletal 2 epidermal;Keratin, type II cytoskeletal 2 epidermal	;K22E_HUMAN	440;440	TRUE	_NKLNDLEEALQQAKEDLAR_		17212	92379.1	39868.1	31207.7
KRT2	Homo sapiens	Keratin, type II cytoskeletal 2 epidermal;Keratin, type II cytoskeletal 2 epidermal	;K22E_HUMAN	419;419	TRUE	_NVQDAIADAEQR_		22597.7	68727.1	35853.1	25083.1
KRT2	Homo sapiens	Keratin, type II cytoskeletal 2 epidermal;Keratin, type II cytoskeletal 2 epidermal	;K22E_HUMAN	440;440	TRUE	_NKLNDLEEALQQAK_		21371.8	67957.3	29699.5	32676.5
KRT2	Homo sapiens	Keratin, type II cytoskeletal 2 epidermal;Keratin, type II cytoskeletal 2 epidermal	;K22E_HUMAN	248;248	TRUE	_TSQNSELNNMQDLVEDYKK_	9.78283	25450	67029.2	29180.9	26759.7
KRT2	Homo sapiens	Keratin, type II cytoskeletal 2 epidermal;Keratin, type II cytoskeletal 2 epidermal	;K22E_HUMAN	248;248	TRUE	_TSQNSELNNM[Oxidation (M)]QDLVEDYKK_	9.78283	25450	67029.2	29180.9	26759.7
KRT2	Homo sapiens	Keratin, type II cytoskeletal 2 epidermal;Keratin, type II cytoskeletal 2 epidermal	;K22E_HUMAN	419;419	TRUE	_NVQDAIADAEQRGEHALK_		15740.7	62041.6	20004.3	20503.8
KRT2	Homo sapiens	Keratin, type II cytoskeletal 2 epidermal;Keratin, type II cytoskeletal 2 epidermal	;K22E_HUMAN	21;21	TRUE	_GFSSGSAVVSGGSRR_		28377.9	44293.9	28172.5	10548.8
KRT2	Homo sapiens	Keratin, type II cytoskeletal 2 epidermal;Keratin, type II cytoskeletal 2 epidermal	;K22E_HUMAN	550;550	TRUE	_GGSGGGGSISGGGYGSGGGSGGR_		20325.9	43892.4	33091.4	8423.78
KRT2	Homo sapiens	Keratin, type II cytoskeletal 2 epidermal;Keratin, type II cytoskeletal 2 epidermal	;K22E_HUMAN	267;267	FALSE	_KYEDEINKR_		17384.6	42088.3	23684.2	17119.8
KRT2	Homo sapiens	Keratin, type II cytoskeletal 2 epidermal;Keratin, type II cytoskeletal 2 epidermal	;K22E_HUMAN	394;394	FALSE	_IEISELNRVIQR_		20307.6	36293.1	31769.8	9042.74
KRT2	Homo sapiens	Keratin, type II cytoskeletal 2 epidermal;Keratin, type II cytoskeletal 2 epidermal	;K22E_HUMAN	581;581	TRUE	_GGSISGGGYGSGGGK_		16065.7	36652.4	21672.4	16331.2
KRT2	Homo sapiens	Keratin, type II cytoskeletal 2 epidermal;Keratin, type II cytoskeletal 2 epidermal	;K22E_HUMAN	391;391	TRUE	_EIKIEISELNR_		10751.1	44133.4	18234.2	14622.4
KRT2	Homo sapiens	Keratin, type II cytoskeletal 2 epidermal;Keratin, type II cytoskeletal 2 epidermal	;K22E_HUMAN	442;442	TRUE	_LNDLEEALQQAK_		9514.28	31052.9	14011.2	22899.5
KRT2	Homo sapiens	Keratin, type II cytoskeletal 2 epidermal;Keratin, type II cytoskeletal 2 epidermal	;K22E_HUMAN	363;363	TRUE	_SKEEAEALYHSK_		10987.7	28639	17541.7	16258.2
KRT2	Homo sapiens	Keratin, type II cytoskeletal 2 epidermal;Keratin, type II cytoskeletal 2 epidermal	;K22E_HUMAN	525;525	TRUE	_GSSSGGGYSSGSSSYGSGGR_		9205.85	34454.5	17965.6	10193.4
KRT2	Homo sapiens	Keratin, type II cytoskeletal 2 epidermal;Keratin, type II cytoskeletal 2 epidermal	;K22E_HUMAN	442;442	TRUE	_LNDLEEALQQAKEDLAR_		5572.46	25483.9	7637.59	8385.72
KRT2	Homo sapiens	Keratin, type II cytoskeletal 2 epidermal;Keratin, type II cytoskeletal 2 epidermal	;K22E_HUMAN	516;516	TRUE	_AAFGGSGGR_		3563.15	22077	9486.44	5540.36
KRT2	Homo sapiens	Keratin, type II cytoskeletal 2 epidermal;Keratin, type II cytoskeletal 2 epidermal	;K22E_HUMAN	288;288	TRUE	_DVDNAYM[Oxidation (M)]IKVELQSK_	104.1	4626.46	17053.5	5218.02	3628.62
KRT2	Homo sapiens	Keratin, type II cytoskeletal 2 epidermal;Keratin, type II cytoskeletal 2 epidermal	;K22E_HUMAN	288;288	TRUE	_DVDNAYMIKVELQSK_	104.1	4626.46	17053.5	5218.02	3628.62
KRT2	Homo sapiens	Keratin, type II cytoskeletal 2 epidermal;Keratin, type II cytoskeletal 2 epidermal	;K22E_HUMAN	36;36	TRUE	_STSSFSC[Carbamidomethyl (C)]LSR_		2385.54	21883	2211.95	3560.1
KRT2	Homo sapiens	Keratin, type II cytoskeletal 2 epidermal;Keratin, type II cytoskeletal 2 epidermal	;K22E_HUMAN	406;406	TRUE	_LQGEIAHVK_		3803.58	13064.6	5826.08	3365.22
KRT2	Homo sapiens	Keratin, type II cytoskeletal 2 epidermal;Keratin, type II cytoskeletal 2 epidermal	;K22E_HUMAN	287;287	TRUE	_KDVDNAYMIK_		4011.39	9800.75	5504.45	5466.47
KRT2	Homo sapiens	Keratin, type II cytoskeletal 2 epidermal;Keratin, type II cytoskeletal 2 epidermal	;K22E_HUMAN	287;287	TRUE	_KDVDNAYM[Oxidation (M)]IK_		4011.39	9800.75	5504.45	5466.47
KRT2	Homo sapiens	Keratin, type II cytoskeletal 2 epidermal;Keratin, type II cytoskeletal 2 epidermal	;K22E_HUMAN	248;248	TRUE	_TSQNSELNNMQDLVEDYK_		3030.58	7163.12	3048.25	2259.53
KRT2	Homo sapiens	Keratin, type II cytoskeletal 2 epidermal;Keratin, type II cytoskeletal 2 epidermal	;K22E_HUMAN	248;248	TRUE	_TSQNSELNNM[Oxidation (M)]QDLVEDYK_		3030.58	7163.12	3048.25	2259.53
KRT2	Homo sapiens	Keratin, type II cytoskeletal 2 epidermal;Keratin, type II cytoskeletal 2 epidermal	;K22E_HUMAN	385;385	TRUE	_HGDSLKEIKIEISELNR_		1476.03	8544	3917.71	1415.09
KRT2	Homo sapiens	Keratin, type II cytoskeletal 2 epidermal;Keratin, type II cytoskeletal 2 epidermal	;K22E_HUMAN	604;604	TRUE	_GGSSSGGGYGSGGGGSSSVK_		1039.58	7053.79	3725.32	1908.23
KRT2	Homo sapiens	Keratin, type II cytoskeletal 2 epidermal;Keratin, type II cytoskeletal 2 epidermal	;K22E_HUMAN	248;248	TRUE	_TSQNSELNNMQDLVEDYKKK_		1539.13	4598.26	1714.58	1390.54
KRT2	Homo sapiens	Keratin, type II cytoskeletal 2 epidermal;Keratin, type II cytoskeletal 2 epidermal	;K22E_HUMAN	248;248	TRUE	_TSQNSELNNM[Oxidation (M)]QDLVEDYKKK_		1539.13	4598.26	1714.58	1390.54
KRT2	Homo sapiens	Keratin, type II cytoskeletal 2 epidermal;Keratin, type II cytoskeletal 2 epidermal	;K22E_HUMAN	516;516	TRUE	_AAFGGSGGRGSSSGGGYSSGSSSYGSGGR_		1652.58	4242.29	2227.48	818.091
KRT2	Homo sapiens	Keratin, type II cytoskeletal 2 epidermal;Keratin, type II cytoskeletal 2 epidermal	;K22E_HUMAN	35;35	TRUE	_RSTSSFSC[Carbamidomethyl (C)]LSR_		597.364	6664.81	685.82	880.763
KRT2	Homo sapiens	Keratin, type II cytoskeletal 2 epidermal;Keratin, type II cytoskeletal 2 epidermal	;K22E_HUMAN	2;2	TRUE	_[Acetyl (Protein N-term)]SC[Carbamidomethyl (C)]QISC[Carbamidomethyl (C)]K_		630.373	5777.6	408.021	796.81
KRT2	Homo sapiens	Keratin, type II cytoskeletal 2 epidermal;Keratin, type II cytoskeletal 2 epidermal	;K22E_HUMAN	167;167	TRUE	_VDPEIQNVKAQER_		2230.19	2291.85	1776.66	497.728
KRT2	Homo sapiens	Keratin, type II cytoskeletal 2 epidermal;Keratin, type II cytoskeletal 2 epidermal	;K22E_HUMAN	210;210	TRUE	_WELLQQMNVGTR_		340.571	3507.37	1376.75	1414.86
KRT2	Homo sapiens	Keratin, type II cytoskeletal 2 epidermal;Keratin, type II cytoskeletal 2 epidermal	;K22E_HUMAN	210;210	TRUE	_WELLQQM[Oxidation (M)]NVGTR_		340.571	3507.37	1376.75	1414.86
KRT2	Homo sapiens	Keratin, type II cytoskeletal 2 epidermal;Keratin, type II cytoskeletal 2 epidermal	;K22E_HUMAN	238;238	TRUE	_RYLDGLTAER_		796.449	2600.86	1480.68	844.902
KRT2	Homo sapiens	Keratin, type II cytoskeletal 2 epidermal;Keratin, type II cytoskeletal 2 epidermal	;K22E_HUMAN	573;573	TRUE	_YGSGGGSKGGSISGGGYGSGGGK_		993.791	3030.96	1072.21	291.95
KRT2	Homo sapiens	Keratin, type II cytoskeletal 2 epidermal;Keratin, type II cytoskeletal 2 epidermal	;K22E_HUMAN	167;167	TRUE	_VDPEIQNVKAQEREQIK_		1048.56	1132.22	686.359	243.99
KRT2	Homo sapiens	Keratin, type II cytoskeletal 2 epidermal;Keratin, type II cytoskeletal 2 epidermal	;K22E_HUMAN	365;365	TRUE	_EEAEALYHSK_		350.031	343.668	625.379	1043.69
KRT2	Homo sapiens	Keratin, type II cytoskeletal 2 epidermal;Keratin, type II cytoskeletal 2 epidermal	;K22E_HUMAN	222;222	TRUE	_PINLEPIFQGYIDSLKR_		75.2357	1375.51	435.324	546.469
KRT2	Homo sapiens	Keratin, type II cytoskeletal 2 epidermal;Keratin, type II cytoskeletal 2 epidermal	;K22E_HUMAN	276;276	TRUE	_TAAENDFVTLKKDVDNAYMIK_		647.443	1013.53	412.181	93.0181
KRT2	Homo sapiens	Keratin, type II cytoskeletal 2 epidermal;Keratin, type II cytoskeletal 2 epidermal	;K22E_HUMAN	276;276	TRUE	_TAAENDFVTLKKDVDNAYM[Oxidation (M)]IK_		647.443	1013.53	412.181	93.0181
KRT2	Homo sapiens	Keratin, type II cytoskeletal 2 epidermal;Keratin, type II cytoskeletal 2 epidermal	;K22E_HUMAN	11;11	TRUE	_GRGGGGGGFRGFSSGSAVVSGGSR_		302.725	821.14	781.901	303.016
KRT2	Homo sapiens	Keratin, type II cytoskeletal 2 epidermal;Keratin, type II cytoskeletal 2 epidermal	;K22E_HUMAN	275;275	TRUE	_RTAAENDFVTLKK_		327.93	1099.13	437.921	242.976
KRT2	Homo sapiens	Keratin, type II cytoskeletal 2 epidermal;Keratin, type II cytoskeletal 2 epidermal	;K22E_HUMAN	176;176	FALSE	_AQEREQIKTLNNK_		637.079	622.98	434.261
KRT2	Homo sapiens	Keratin, type II cytoskeletal 2 epidermal;Keratin, type II cytoskeletal 2 epidermal	;K22E_HUMAN	581;581	TRUE	_GGSISGGGYGSGGGKHSSGGGSR_		173.311	580.45	356.051	106.482
KRT2	Homo sapiens	Keratin, type II cytoskeletal 2 epidermal;Keratin, type II cytoskeletal 2 epidermal	;K22E_HUMAN	210;210	TRUE	_WELLQQM[Oxidation (M)]NVGTRPINLEPIFQGYIDSLK_		22.4481	499.495	267.24	207.266
KRT2	Homo sapiens	Keratin, type II cytoskeletal 2 epidermal;Keratin, type II cytoskeletal 2 epidermal	;K22E_HUMAN	210;210	TRUE	_WELLQQMNVGTRPINLEPIFQGYIDSLK_		22.4481	499.495	267.24	207.266
KRT2	Homo sapiens	Keratin, type II cytoskeletal 2 epidermal;Keratin, type II cytoskeletal 2 epidermal	;K22E_HUMAN	62;62	TRUE	_SLVGLGGTKSISISVAGGGGGFGAAGGFGGR_		175.224	194.539	301.942	66.2122
KRT2	Homo sapiens	Keratin, type II cytoskeletal 2 epidermal;Keratin, type II cytoskeletal 2 epidermal	;K22E_HUMAN	287;287	TRUE	_KDVDNAYM[Oxidation (M)]IKVELQSK_		67.2913	442.717	62.8739	64.0049
KRT2	Homo sapiens	Keratin, type II cytoskeletal 2 epidermal;Keratin, type II cytoskeletal 2 epidermal	;K22E_HUMAN	267;267	FALSE	_KYEDEINK_		48.0733	210.446	134.731	71.4301
KRT2	Homo sapiens	Keratin, type II cytoskeletal 2 epidermal;Keratin, type II cytoskeletal 2 epidermal	;K22E_HUMAN	406;406	TRUE	_LQGEIAHVKK_		48.4721	294.723	92.3275	26.0718
KRT2	Homo sapiens	Keratin, type II cytoskeletal 2 epidermal;Keratin, type II cytoskeletal 2 epidermal	;K22E_HUMAN	222;222	TRUE	_PINLEPIFQGYIDSLK_		21.7197	152.273	64.446	85.6862
KRT2	Homo sapiens	Keratin, type II cytoskeletal 2 epidermal;Keratin, type II cytoskeletal 2 epidermal	;K22E_HUMAN	196;196	FALSE	_VRFLEQQNQVLQTK_		407.952	1113.48	421.039
KRT2	Homo sapiens	Keratin, type II cytoskeletal 2 epidermal;Keratin, type II cytoskeletal 2 epidermal	;K22E_HUMAN	573;573	TRUE	_YGSGGGSKGGSISGGGYGSGGGKHSSGGGSR_		36.2431	55.1102	27.9378
KRT76	Homo sapiens	Keratin, type II cytoskeletal 2 oral;Keratin, type II cytoskeletal 2 oral	;K22O_HUMAN	293;293	FALSE	_DVDAAFM[Oxidation (M)]NK_		1873.66	13823.2	11688.2	3553.56
KRT76	Homo sapiens	Keratin, type II cytoskeletal 2 oral;Keratin, type II cytoskeletal 2 oral	;K22O_HUMAN	380;380	FALSE	_LGELQTTAGR_			14543.1		452.389
KRT76	Homo sapiens	Keratin, type II cytoskeletal 2 oral;Keratin, type II cytoskeletal 2 oral	;K22O_HUMAN	57;57	TRUE	_SLYNLGSNK_		46.9117	387.694	294.042
KRT76	Homo sapiens	Keratin, type II cytoskeletal 2 oral;Keratin, type II cytoskeletal 2 oral	;K22O_HUMAN	447;447	TRUE	_LQDLQTALQK_			509.008
KRT76	Homo sapiens	Keratin, type II cytoskeletal 2 oral;Keratin, type II cytoskeletal 2 oral	;K22O_HUMAN	413;413	TRUE	_AEIENVK_		7.84937	119.773
KRT76	Homo sapiens	Keratin, type II cytoskeletal 2 oral;Keratin, type II cytoskeletal 2 oral	;K22O_HUMAN	399;399	TRUE	_SEIM[Oxidation (M)]ELNR_			90.1231		29.024
KRT76	Homo sapiens	Keratin, type II cytoskeletal 2 oral;Keratin, type II cytoskeletal 2 oral	;K22O_HUMAN	21;21	FALSE	_SAVVSGSSR_			247.494
KRT76	Homo sapiens	Keratin, type II cytoskeletal 2 oral;Keratin, type II cytoskeletal 2 oral	;K22O_HUMAN	261;261	TRUE	_SMQDLVEDFK_			80.8904	25.3343
KRT76	Homo sapiens	Keratin, type II cytoskeletal 2 oral;Keratin, type II cytoskeletal 2 oral	;K22O_HUMAN	308;308	TRUE	_VDSLTDEVSFLR_			736.947
KRT76	Homo sapiens	Keratin, type II cytoskeletal 2 oral;Keratin, type II cytoskeletal 2 oral	;K22O_HUMAN	261;261	TRUE	_SMQDLVEDFKK_			231.827
KRT1	Homo sapiens	Keratin, type II cytoskeletal 1;Keratin, type II cytoskeletal 1	;K2C1_HUMAN	484;484	TRUE	_TLLEGEESR_	26.9202	335170	879966	942867	262481
KRT1	Homo sapiens	Keratin, type II cytoskeletal 1;Keratin, type II cytoskeletal 1	;K2C1_HUMAN	365;365	TRUE	_SKAEAESLYQSKYEELQITAGR_	1656.29	238632	611815	335933	101204
KRT1	Homo sapiens	Keratin, type II cytoskeletal 1;Keratin, type II cytoskeletal 1	;K2C1_HUMAN	442;442	TRUE	_NKLNDLEDALQQAKEDLAR_	98.3541	52480	320210	248618	99212.7
KRT1	Homo sapiens	Keratin, type II cytoskeletal 1;Keratin, type II cytoskeletal 1	;K2C1_HUMAN	13;13	TRUE	_SGGGFSSGSAGIINYQR_	300.554	40191.1	200271	115848	47882.8
KRT1	Homo sapiens	Keratin, type II cytoskeletal 1;Keratin, type II cytoskeletal 1	;K2C1_HUMAN	200;200	TRUE	_FLEQQNQVLQTKWELLQQVDTSTR_	2552.11	37431.3	71826.4	41980	24861.3
KRT1	Homo sapiens	Keratin, type II cytoskeletal 1;Keratin, type II cytoskeletal 1	;K2C1_HUMAN	519;519	TRUE	_GGGGGGYGSGGSSYGSGGGSYGSGGGGGGGR_	115.592	18507	64082.9	67120.8	18050.1
KRT1	Homo sapiens	Keratin, type II cytoskeletal 1;Keratin, type II cytoskeletal 1	;K2C1_HUMAN	493;493	TRUE	_MSGEC[Carbamidomethyl (C)]APNVSVSVSTSHTTISGGGSR_	270.597	2723.9	58040.2	4343.64	5360.59
KRT1	Homo sapiens	Keratin, type II cytoskeletal 1;Keratin, type II cytoskeletal 1	;K2C1_HUMAN	493;493	TRUE	_M[Oxidation (M)]SGEC[Carbamidomethyl (C)]APNVSVSVSTSHTTISGGGSR_	270.597	2723.9	58040.2	4343.64	5360.59
KRT1	Homo sapiens	Keratin, type II cytoskeletal 1;Keratin, type II cytoskeletal 1	;K2C1_HUMAN	46;46	TRUE	_FSSC[Carbamidomethyl (C)]GGGGGSFGAGGGFGSR_	1656.09	3838.13	40454.9	7177.4	4895.43
KRT1	Homo sapiens	Keratin, type II cytoskeletal 1;Keratin, type II cytoskeletal 1	;K2C1_HUMAN	344;344	TRUE	_SLDLDSIIAEVK_	189.459	381689	1.06135e+06	704247	283945
KRT1	Homo sapiens	Keratin, type II cytoskeletal 1;Keratin, type II cytoskeletal 1	;K2C1_HUMAN	66;66	TRUE	_SLVNLGGSK_	79.6453	336939	902451	855001	261162
KRT1	Homo sapiens	Keratin, type II cytoskeletal 1;Keratin, type II cytoskeletal 1	;K2C1_HUMAN	212;212	TRUE	_WELLQQVDTSTR_	347.67	189982	717243	747368	201463
KRT1	Homo sapiens	Keratin, type II cytoskeletal 1;Keratin, type II cytoskeletal 1	;K2C1_HUMAN	278;278	TRUE	_TNAENEFVTIKK_	16.1419	236544	690533	567795	175826
KRT1	Homo sapiens	Keratin, type II cytoskeletal 1;Keratin, type II cytoskeletal 1	;K2C1_HUMAN	356;356	TRUE	_AQYEDIAQK_		216762	601628	633377	178300
KRT1	Homo sapiens	Keratin, type II cytoskeletal 1;Keratin, type II cytoskeletal 1	;K2C1_HUMAN	224;224	TRUE	_THNLEPYFESFINNLR_	206.57	103998	614324	514902	182928
KRT1	Homo sapiens	Keratin, type II cytoskeletal 1;Keratin, type II cytoskeletal 1	;K2C1_HUMAN	278;278	TRUE	_TNAENEFVTIK_		175668	457413	486091	182272
KRT1	Homo sapiens	Keratin, type II cytoskeletal 1;Keratin, type II cytoskeletal 1	;K2C1_HUMAN	461;461	TRUE	_LLRDYQELMNTK_		111159	513479	554378	110546
KRT1	Homo sapiens	Keratin, type II cytoskeletal 1;Keratin, type II cytoskeletal 1	;K2C1_HUMAN	461;461	TRUE	_LLRDYQELM[Oxidation (M)]NTK_		111159	513479	554378	110546
KRT1	Homo sapiens	Keratin, type II cytoskeletal 1;Keratin, type II cytoskeletal 1	;K2C1_HUMAN	418;418	TRUE	_QISNLQQSISDAEQR_		125545	548328	405876	127536
KRT1	Homo sapiens	Keratin, type II cytoskeletal 1;Keratin, type II cytoskeletal 1	;K2C1_HUMAN	464;464	TRUE	_DYQELMNTK_		126123	431185	447632	140969
KRT1	Homo sapiens	Keratin, type II cytoskeletal 1;Keratin, type II cytoskeletal 1	;K2C1_HUMAN	464;464	TRUE	_DYQELM[Oxidation (M)]NTK_		126123	431185	447632	140969
KRT1	Homo sapiens	Keratin, type II cytoskeletal 1;Keratin, type II cytoskeletal 1	;K2C1_HUMAN	186;186	TRUE	_SLNNQFASFIDK_		116392	438954	441876	133812
KRT1	Homo sapiens	Keratin, type II cytoskeletal 1;Keratin, type II cytoskeletal 1	;K2C1_HUMAN	75;75	TRUE	_SISISVAR_		131254	383286	369381	110658
KRT1	Homo sapiens	Keratin, type II cytoskeletal 1;Keratin, type II cytoskeletal 1	;K2C1_HUMAN	186;186	TRUE	_SLNNQFASFIDKVR_		172634	430459	270263	89237
KRT1	Homo sapiens	Keratin, type II cytoskeletal 1;Keratin, type II cytoskeletal 1	;K2C1_HUMAN	258;258	TRUE	_NMQDMVEDYR_		67060.1	306626	300583	114996
KRT1	Homo sapiens	Keratin, type II cytoskeletal 1;Keratin, type II cytoskeletal 1	;K2C1_HUMAN	258;258	TRUE	_NMQDM[Oxidation (M)]VEDYR_		67060.1	306626	300583	114996
KRT1	Homo sapiens	Keratin, type II cytoskeletal 1;Keratin, type II cytoskeletal 1	;K2C1_HUMAN	258;258	TRUE	_NM[Oxidation (M)]QDMVEDYR_		67060.1	306626	300583	114996
KRT1	Homo sapiens	Keratin, type II cytoskeletal 1;Keratin, type II cytoskeletal 1	;K2C1_HUMAN	258;258	TRUE	_NM[Oxidation (M)]QDM[Oxidation (M)]VEDYR_		67060.1	306626	300583	114996
KRT1	Homo sapiens	Keratin, type II cytoskeletal 1;Keratin, type II cytoskeletal 1	;K2C1_HUMAN	365;365	TRUE	_SKAEAESLYQSK_		91831.2	279016	316594	96457.3
KRT1	Homo sapiens	Keratin, type II cytoskeletal 1;Keratin, type II cytoskeletal 1	;K2C1_HUMAN	290;290	TRUE	_DVDGAYMTK_		100245	301539	295979	82143.6
KRT1	Homo sapiens	Keratin, type II cytoskeletal 1;Keratin, type II cytoskeletal 1	;K2C1_HUMAN	290;290	TRUE	_DVDGAYM[Oxidation (M)]TK_		100245	301539	295979	82143.6
KRT1	Homo sapiens	Keratin, type II cytoskeletal 1;Keratin, type II cytoskeletal 1	;K2C1_HUMAN	224;224	TRUE	_THNLEPYFESFINNLRR_	51.5628	55566.6	280731	251809	83221.8
KRT1	Homo sapiens	Keratin, type II cytoskeletal 1;Keratin, type II cytoskeletal 1	;K2C1_HUMAN	418;418	TRUE	_QISNLQQSISDAEQRGENALKDAK_	21.6565	67137.1	277055	198985	72682
KRT1	Homo sapiens	Keratin, type II cytoskeletal 1;Keratin, type II cytoskeletal 1	;K2C1_HUMAN	393;393	TRUE	_NSKIEISELNR_	18.0988	63270.6	230402	201866	54472.6
KRT1	Homo sapiens	Keratin, type II cytoskeletal 1;Keratin, type II cytoskeletal 1	;K2C1_HUMAN	442;442	TRUE	_NKLNDLEDALQQAK_	3.00363	51913	240564	178218	65446.6
KRT1	Homo sapiens	Keratin, type II cytoskeletal 1;Keratin, type II cytoskeletal 1	;K2C1_HUMAN	473;473	TRUE	_LALDLEIATYR_	728.942	50959.7	223966	151221	77459.6
KRT1	Homo sapiens	Keratin, type II cytoskeletal 1;Keratin, type II cytoskeletal 1	;K2C1_HUMAN	247;247	TRUE	_SDQSRLDSELK_		60759.1	182480	158832	43018.7
KRT1	Homo sapiens	Keratin, type II cytoskeletal 1;Keratin, type II cytoskeletal 1	;K2C1_HUMAN	444;444	TRUE	_LNDLEDALQQAKEDLAR_		39226	143372	97824.7	42069.3
KRT1	Homo sapiens	Keratin, type II cytoskeletal 1;Keratin, type II cytoskeletal 1	;K2C1_HUMAN	367;367	TRUE	_AEAESLYQSK_		43979.4	95100.8	117761	49284.6
KRT1	Homo sapiens	Keratin, type II cytoskeletal 1;Keratin, type II cytoskeletal 1	;K2C1_HUMAN	444;444	TRUE	_LNDLEDALQQAK_		34066.6	104866	94334.7	49862.9
KRT1	Homo sapiens	Keratin, type II cytoskeletal 1;Keratin, type II cytoskeletal 1	;K2C1_HUMAN	408;408	TRUE	_LRSEIDNVKK_		27269.4	114654	105129	24622.6
KRT1	Homo sapiens	Keratin, type II cytoskeletal 1;Keratin, type II cytoskeletal 1	;K2C1_HUMAN	252;252	TRUE	_LDSELKNMQDMVEDYR_		31772.1	113981	84925.2	30491.6
KRT1	Homo sapiens	Keratin, type II cytoskeletal 1;Keratin, type II cytoskeletal 1	;K2C1_HUMAN	252;252	TRUE	_LDSELKNMQDM[Oxidation (M)]VEDYR_		31772.1	113981	84925.2	30491.6
KRT1	Homo sapiens	Keratin, type II cytoskeletal 1;Keratin, type II cytoskeletal 1	;K2C1_HUMAN	252;252	TRUE	_LDSELKNM[Oxidation (M)]QDM[Oxidation (M)]VEDYR_		31772.1	113981	84925.2	30491.6
KRT1	Homo sapiens	Keratin, type II cytoskeletal 1;Keratin, type II cytoskeletal 1	;K2C1_HUMAN	252;252	TRUE	_LDSELKNM[Oxidation (M)]QDMVEDYR_		31772.1	113981	84925.2	30491.6
KRT1	Homo sapiens	Keratin, type II cytoskeletal 1;Keratin, type II cytoskeletal 1	;K2C1_HUMAN	367;367	TRUE	_AEAESLYQSKYEELQITAGR_	435.125	43006.8	92370.3	53959	18963.9
KRT1	Homo sapiens	Keratin, type II cytoskeletal 1;Keratin, type II cytoskeletal 1	;K2C1_HUMAN	418;418	TRUE	_QISNLQQSISDAEQRGENALK_		25417.6	91774.5	56953.3	22600.6
KRT1	Homo sapiens	Keratin, type II cytoskeletal 1;Keratin, type II cytoskeletal 1	;K2C1_HUMAN	417;417	TRUE	_KQISNLQQSISDAEQR_		10173.7	56144.4	42657.9	9592
KRT1	Homo sapiens	Keratin, type II cytoskeletal 1;Keratin, type II cytoskeletal 1	;K2C1_HUMAN	66;66	TRUE	_SLVNLGGSKSISISVAR_		21616.1	29086.9	25900.8	17302.4
KRT1	Homo sapiens	Keratin, type II cytoskeletal 1;Keratin, type II cytoskeletal 1	;K2C1_HUMAN	344;344	TRUE	_SLDLDSIIAEVKAQYEDIAQK_		15194.9	26306.7	12859.5	8556.12
KRT1	Homo sapiens	Keratin, type II cytoskeletal 1;Keratin, type II cytoskeletal 1	;K2C1_HUMAN	290;290	TRUE	_DVDGAYMTKVDLQAK_	77.2498	13223.8	27253.5	14813.7	3577.54
KRT1	Homo sapiens	Keratin, type II cytoskeletal 1;Keratin, type II cytoskeletal 1	;K2C1_HUMAN	290;290	TRUE	_DVDGAYM[Oxidation (M)]TKVDLQAK_	77.2498	13223.8	27253.5	14813.7	3577.54
KRT1	Homo sapiens	Keratin, type II cytoskeletal 1;Keratin, type II cytoskeletal 1	;K2C1_HUMAN	410;410	TRUE	_SEIDNVK_		5417.26	19555.1	16044.9	8096.32
KRT1	Homo sapiens	Keratin, type II cytoskeletal 1;Keratin, type II cytoskeletal 1	;K2C1_HUMAN	603;603	TRUE	_GSGGGSSGGSIGGR_		3466.77	19457.8	16689.7	3283.84
KRT1	Homo sapiens	Keratin, type II cytoskeletal 1;Keratin, type II cytoskeletal 1	;K2C1_HUMAN	278;278	TRUE	_TNAENEFVTIKKDVDGAYMTK_		12013.6	18059.1	6155.27	1966.32
KRT1	Homo sapiens	Keratin, type II cytoskeletal 1;Keratin, type II cytoskeletal 1	;K2C1_HUMAN	278;278	TRUE	_TNAENEFVTIKKDVDGAYM[Oxidation (M)]TK_		12013.6	18059.1	6155.27	1966.32
KRT1	Homo sapiens	Keratin, type II cytoskeletal 1;Keratin, type II cytoskeletal 1	;K2C1_HUMAN	13;13	TRUE	_SGGGFSSGSAGIINYQRR_		9606.18	12209.1	7115.65	8923.38
KRT1	Homo sapiens	Keratin, type II cytoskeletal 1;Keratin, type II cytoskeletal 1	;K2C1_HUMAN	289;289	TRUE	_KDVDGAYM[Oxidation (M)]TK_		3918.05	13446.3	11677.4	2721.52
KRT1	Homo sapiens	Keratin, type II cytoskeletal 1;Keratin, type II cytoskeletal 1	;K2C1_HUMAN	289;289	TRUE	_KDVDGAYMTK_		3918.05	13446.3	11677.4	2721.52
KRT1	Homo sapiens	Keratin, type II cytoskeletal 1;Keratin, type II cytoskeletal 1	;K2C1_HUMAN	277;277	TRUE	_RTNAENEFVTIKK_		5066.82	12593.3	11442.9	2556.79
KRT1	Homo sapiens	Keratin, type II cytoskeletal 1;Keratin, type II cytoskeletal 1	;K2C1_HUMAN	247;247	TRUE	_SDQSRLDSELKNMQDMVEDYR_		4759.37	14104.7	6996.25	1312.75
KRT1	Homo sapiens	Keratin, type II cytoskeletal 1;Keratin, type II cytoskeletal 1	;K2C1_HUMAN	247;247	TRUE	_SDQSRLDSELKNMQDM[Oxidation (M)]VEDYR_		4759.37	14104.7	6996.25	1312.75
KRT1	Homo sapiens	Keratin, type II cytoskeletal 1;Keratin, type II cytoskeletal 1	;K2C1_HUMAN	247;247	TRUE	_SDQSRLDSELKNM[Oxidation (M)]QDM[Oxidation (M)]VEDYR_		4759.37	14104.7	6996.25	1312.75
KRT1	Homo sapiens	Keratin, type II cytoskeletal 1;Keratin, type II cytoskeletal 1	;K2C1_HUMAN	247;247	TRUE	_SDQSRLDSELKNM[Oxidation (M)]QDMVEDYR_		4759.37	14104.7	6996.25	1312.75
KRT1	Homo sapiens	Keratin, type II cytoskeletal 1;Keratin, type II cytoskeletal 1	;K2C1_HUMAN	242;242	TRUE	_VDQLKSDQSRLDSELK_		5359.24	12693.3	7064.52	1522.87
KRT1	Homo sapiens	Keratin, type II cytoskeletal 1;Keratin, type II cytoskeletal 1	;K2C1_HUMAN	408;408	TRUE	_LRSEIDNVK_		3091.92	10260.6	9912.8	2500.07
KRT1	Homo sapiens	Keratin, type II cytoskeletal 1;Keratin, type II cytoskeletal 1	;K2C1_HUMAN	417;417	TRUE	_KQISNLQQSISDAEQRGENALK_		1683.25	11782.8	6891.92	2457.11
KRT1	Homo sapiens	Keratin, type II cytoskeletal 1;Keratin, type II cytoskeletal 1	;K2C1_HUMAN	393;393	TRUE	_NSKIEISELNRVIQR_		6005.5	5911.04	5269.98	1549.31
KRT1	Homo sapiens	Keratin, type II cytoskeletal 1;Keratin, type II cytoskeletal 1	;K2C1_HUMAN	410;410	TRUE	_SEIDNVKK_		981.755	4661.76	4032.28	1079.01
KRT1	Homo sapiens	Keratin, type II cytoskeletal 1;Keratin, type II cytoskeletal 1	;K2C1_HUMAN	634;634	TRUE	_FVSTTYSGVTR_		1834.7	5641.22	592.937	1659.3
KRT1	Homo sapiens	Keratin, type II cytoskeletal 1;Keratin, type II cytoskeletal 1	;K2C1_HUMAN	277;277	TRUE	_RTNAENEFVTIK_		753.305	3927.04	3334.57	1049.23
KRT1	Homo sapiens	Keratin, type II cytoskeletal 1;Keratin, type II cytoskeletal 1	;K2C1_HUMAN	258;258	TRUE	_NMQDMVEDYRNK_		484.857	4271.38	2908.98	1035.17
KRT1	Homo sapiens	Keratin, type II cytoskeletal 1;Keratin, type II cytoskeletal 1	;K2C1_HUMAN	258;258	TRUE	_NMQDM[Oxidation (M)]VEDYRNK_		484.857	4271.38	2908.98	1035.17
KRT1	Homo sapiens	Keratin, type II cytoskeletal 1;Keratin, type II cytoskeletal 1	;K2C1_HUMAN	258;258	TRUE	_NM[Oxidation (M)]QDMVEDYRNK_		484.857	4271.38	2908.98	1035.17
KRT1	Homo sapiens	Keratin, type II cytoskeletal 1;Keratin, type II cytoskeletal 1	;K2C1_HUMAN	182;182	TRUE	_EQIKSLNNQFASFIDKVR_		2527.32	2744.88	1464.02	1530.98
KRT1	Homo sapiens	Keratin, type II cytoskeletal 1;Keratin, type II cytoskeletal 1	;K2C1_HUMAN	356;356	TRUE	_AQYEDIAQKSK_		2211.68	2476.14	1951.68	899.446
KRT1	Homo sapiens	Keratin, type II cytoskeletal 1;Keratin, type II cytoskeletal 1	;K2C1_HUMAN	344;344	TRUE	_SLDLDSIIAEVKAQYEDIAQKSK_		1191.07	2605.37	1432.79	1589.67
KRT1	Homo sapiens	Keratin, type II cytoskeletal 1;Keratin, type II cytoskeletal 1	;K2C1_HUMAN	242;242	TRUE	_VDQLKSDQSR_		999.684	2798.17	2671.13	284.041
KRT1	Homo sapiens	Keratin, type II cytoskeletal 1;Keratin, type II cytoskeletal 1	;K2C1_HUMAN	241;241	TRUE	_RVDQLKSDQSR_		1392.28	2947.99	1834.38	348.949
KRT1	Homo sapiens	Keratin, type II cytoskeletal 1;Keratin, type II cytoskeletal 1	;K2C1_HUMAN	550;550	TRUE	_GSYGSGGSSYGSGGGSYGSGGGGGGHGSYGSGSSSGGYR_		344.469	3077.32	2065.02	374.042
KRT1	Homo sapiens	Keratin, type II cytoskeletal 1;Keratin, type II cytoskeletal 1	;K2C1_HUMAN	356;356	TRUE	_AQYEDIAQKSKAEAESLYQSK_		1929.48	2631.43	722.467	233.114
KRT1	Homo sapiens	Keratin, type II cytoskeletal 1;Keratin, type II cytoskeletal 1	;K2C1_HUMAN	377;377	TRUE	_YEELQITAGRHGDSVR_		969.238	1143.11	1435.57	556.281
KRT1	Homo sapiens	Keratin, type II cytoskeletal 1;Keratin, type II cytoskeletal 1	;K2C1_HUMAN	258;258	TRUE	_NMQDMVEDYRNKYEDEINK_		579.736	1949.87	920.147	309.701
KRT1	Homo sapiens	Keratin, type II cytoskeletal 1;Keratin, type II cytoskeletal 1	;K2C1_HUMAN	258;258	TRUE	_NMQDM[Oxidation (M)]VEDYRNKYEDEINK_		579.736	1949.87	920.147	309.701
KRT1	Homo sapiens	Keratin, type II cytoskeletal 1;Keratin, type II cytoskeletal 1	;K2C1_HUMAN	289;289	TRUE	_KDVDGAYMTKVDLQAK_		1024.16	1611.99	866.717	153.182
KRT1	Homo sapiens	Keratin, type II cytoskeletal 1;Keratin, type II cytoskeletal 1	;K2C1_HUMAN	9;9	TRUE	_SGYRSGGGFSSGSAGIINYQR_		1264.61	608.423	775.144	764.214
KRT1	Homo sapiens	Keratin, type II cytoskeletal 1;Keratin, type II cytoskeletal 1	;K2C1_HUMAN	252;252	TRUE	_LDSELKNM[Oxidation (M)]QDM[Oxidation (M)]VEDYRNK_		608.309	916.392	944.371	472.125
KRT1	Homo sapiens	Keratin, type II cytoskeletal 1;Keratin, type II cytoskeletal 1	;K2C1_HUMAN	252;252	TRUE	_LDSELKNMQDMVEDYRNK_		608.309	916.392	944.371	472.125
KRT1	Homo sapiens	Keratin, type II cytoskeletal 1;Keratin, type II cytoskeletal 1	;K2C1_HUMAN	603;603	TRUE	_GSGGGSSGGSIGGRGSSSGGVK_		629.924	1034.55	468.288	292.111
KRT1	Homo sapiens	Keratin, type II cytoskeletal 1;Keratin, type II cytoskeletal 1	;K2C1_HUMAN	433;433	TRUE	_GENALKDAK_		165.054	1453.19	527.247	104.695
KRT1	Homo sapiens	Keratin, type II cytoskeletal 1;Keratin, type II cytoskeletal 1	;K2C1_HUMAN	461;461	TRUE	_LLRDYQELMNTKLALDLEIATYR_		77.9771	181.141	326.959	295.317
KRT1	Homo sapiens	Keratin, type II cytoskeletal 1;Keratin, type II cytoskeletal 1	;K2C1_HUMAN	589;589	TRUE	_GGSGGGGGGSSGGRGSGGGSSGGSIGGR_		193.703	288.93	95.4114	48.0022
KRT1	Homo sapiens	Keratin, type II cytoskeletal 1;Keratin, type II cytoskeletal 1	;K2C1_HUMAN	182;182	TRUE	_EQIKSLNNQFASFIDK_		168.248	129.218		169.776
KRT1	Homo sapiens	Keratin, type II cytoskeletal 1;Keratin, type II cytoskeletal 1	;K2C1_HUMAN	484;484	TRUE	_TLLEGEESRM[Oxidation (M)]SGEC[Carbamidomethyl (C)]APNVSVSVSTSHTTISGGGSR_			1638.61	122.629	88.2216
KRT1	Homo sapiens	Keratin, type II cytoskeletal 1;Keratin, type II cytoskeletal 1	;K2C1_HUMAN	484;484	TRUE	_TLLEGEESRMSGEC[Carbamidomethyl (C)]APNVSVSVSTSHTTISGGGSR_			1638.61	122.629	88.2216
KRT1	Homo sapiens	Keratin, type II cytoskeletal 1;Keratin, type II cytoskeletal 1	;K2C1_HUMAN	410;410	TRUE	_SEIDNVKKQISNLQQSISDAEQR_		307.022	531.522	438.613
KRT1	Homo sapiens	Keratin, type II cytoskeletal 1;Keratin, type II cytoskeletal 1	;K2C1_HUMAN	212;212	TRUE	_WELLQQVDTSTRTHNLEPYFESFINNLR_			35.7053	69.368
KRT77	Homo sapiens	Keratin, type II cytoskeletal 1b;Keratin, type II cytoskeletal 1b	;K2C1B_HUMAN	340;340	TRUE	_TQYELIAQR_		10945.1	4929.7	5025.73	4163.47
KRT77	Homo sapiens	Keratin, type II cytoskeletal 1b;Keratin, type II cytoskeletal 1b	;K2C1B_HUMAN	225;225	TRUE	_QVDLLSAEQMR_		9966.04	3998.16	3687.36	2924.22
KRT77	Homo sapiens	Keratin, type II cytoskeletal 1b;Keratin, type II cytoskeletal 1b	;K2C1B_HUMAN	225;225	TRUE	_QVDLLSAEQM[Oxidation (M)]R_		9966.04	3998.16	3687.36	2924.22
KRT77	Homo sapiens	Keratin, type II cytoskeletal 1b;Keratin, type II cytoskeletal 1b	;K2C1B_HUMAN	468;468	TRUE	_QLLEGEESR_		5118.53	2206.79	1697.14	2208.25
KRT77	Homo sapiens	Keratin, type II cytoskeletal 1b;Keratin, type II cytoskeletal 1b	;K2C1B_HUMAN	361;361	TRUE	_YQELQITAGR_		5202.01	1961.98	2032.8	1450.08
KRT77	Homo sapiens	Keratin, type II cytoskeletal 1b;Keratin, type II cytoskeletal 1b	;K2C1B_HUMAN	289;289	TRUE	_VDTLTGEVNFLK_		4320.33	2082.95	1790.31	2383.28
KRT77	Homo sapiens	Keratin, type II cytoskeletal 1b;Keratin, type II cytoskeletal 1b	;K2C1B_HUMAN	262;262	TRUE	_TGSENDFVVLKK_		5140.04	2224.59	1526.98	1679.4
KRT77	Homo sapiens	Keratin, type II cytoskeletal 1b;Keratin, type II cytoskeletal 1b	;K2C1B_HUMAN	349;349	TRUE	_SKDEAEALYQTK_		4787.94	1974.41	1402.21	1285.5
KRT77	Homo sapiens	Keratin, type II cytoskeletal 1b;Keratin, type II cytoskeletal 1b	;K2C1B_HUMAN	328;328	TRUE	_SLDLDSIIDAVR_		4659.74	2203.69	1169.67	1407.38
KRT77	Homo sapiens	Keratin, type II cytoskeletal 1b;Keratin, type II cytoskeletal 1b	;K2C1B_HUMAN	60;60	TRUE	_SLYNLGGSR_		3748.2	1426.39	1548.07	1489.76
KRT77	Homo sapiens	Keratin, type II cytoskeletal 1b;Keratin, type II cytoskeletal 1b	;K2C1B_HUMAN	166;166	TRUE	_EQIMVLNNK_		3097.22	1746.39	1348.14	1559.22
KRT77	Homo sapiens	Keratin, type II cytoskeletal 1b;Keratin, type II cytoskeletal 1b	;K2C1B_HUMAN	166;166	TRUE	_EQIM[Oxidation (M)]VLNNK_		3097.22	1746.39	1348.14	1559.22
KRT77	Homo sapiens	Keratin, type II cytoskeletal 1b;Keratin, type II cytoskeletal 1b	;K2C1B_HUMAN	69;69	TRUE	_SISINLM[Oxidation (M)]GR_		2631.4	1400.97	1502.06	1179.76
KRT77	Homo sapiens	Keratin, type II cytoskeletal 1b;Keratin, type II cytoskeletal 1b	;K2C1B_HUMAN	69;69	TRUE	_SISINLMGR_		2631.4	1400.97	1502.06	1179.76
KRT77	Homo sapiens	Keratin, type II cytoskeletal 1b;Keratin, type II cytoskeletal 1b	;K2C1B_HUMAN	242;242	TRUE	_SMQDVVEDYK_		1842.53	831.014	734.512	1204.95
KRT77	Homo sapiens	Keratin, type II cytoskeletal 1b;Keratin, type II cytoskeletal 1b	;K2C1B_HUMAN	242;242	TRUE	_SM[Oxidation (M)]QDVVEDYK_		1842.53	831.014	734.512	1204.95
KRT77	Homo sapiens	Keratin, type II cytoskeletal 1b;Keratin, type II cytoskeletal 1b	;K2C1B_HUMAN	274;274	TRUE	_DVDAAYVSK_		2248.16	869.647	817.713	583.801
KRT77	Homo sapiens	Keratin, type II cytoskeletal 1b;Keratin, type II cytoskeletal 1b	;K2C1B_HUMAN	428;428	TRUE	_LQDLEEALQQSKEELAR_		1596.01	1208.9	784.428	875.659
KRT77	Homo sapiens	Keratin, type II cytoskeletal 1b;Keratin, type II cytoskeletal 1b	;K2C1B_HUMAN	252;252	TRUE	_SKYEDEINKR_		666.656	502.042	797.008	342.966
KRT77	Homo sapiens	Keratin, type II cytoskeletal 1b;Keratin, type II cytoskeletal 1b	;K2C1B_HUMAN	225;225	TRUE	_QVDLLSAEQM[Oxidation (M)]RQNAEVR_		1519.12	172.101	282.268	117.398
KRT77	Homo sapiens	Keratin, type II cytoskeletal 1b;Keratin, type II cytoskeletal 1b	;K2C1B_HUMAN	225;225	TRUE	_QVDLLSAEQMRQNAEVR_		1519.12	172.101	282.268	117.398
KRT77	Homo sapiens	Keratin, type II cytoskeletal 1b;Keratin, type II cytoskeletal 1b	;K2C1B_HUMAN	448;448	TRUE	_DYQAMLGVK_		776.819	497.294	379.038	513.534
KRT77	Homo sapiens	Keratin, type II cytoskeletal 1b;Keratin, type II cytoskeletal 1b	;K2C1B_HUMAN	262;262	TRUE	_TGSENDFVVLK_		749.52	258.428	149.568	333.152
KRT77	Homo sapiens	Keratin, type II cytoskeletal 1b;Keratin, type II cytoskeletal 1b	;K2C1B_HUMAN	283;283	TRUE	_VDLESRVDTLTGEVNFLK_		537.81	526.003	170.155	84.9847
KRT77	Homo sapiens	Keratin, type II cytoskeletal 1b;Keratin, type II cytoskeletal 1b	;K2C1B_HUMAN	162;162	TRUE	_TQEREQIMVLNNK_		733.73	216.695	133.291	167.69
KRT77	Homo sapiens	Keratin, type II cytoskeletal 1b;Keratin, type II cytoskeletal 1b	;K2C1B_HUMAN	162;162	TRUE	_TQEREQIM[Oxidation (M)]VLNNK_		733.73	216.695	133.291	167.69
KRT77	Homo sapiens	Keratin, type II cytoskeletal 1b;Keratin, type II cytoskeletal 1b	;K2C1B_HUMAN	392;392	TRUE	_LQAEISNVK_		499.524	210.013	257.736	242.812
KRT77	Homo sapiens	Keratin, type II cytoskeletal 1b;Keratin, type II cytoskeletal 1b	;K2C1B_HUMAN	445;445	TRUE	_LLRDYQAMLGVK_		485.732	308.123	202.468	175.308
KRT77	Homo sapiens	Keratin, type II cytoskeletal 1b;Keratin, type II cytoskeletal 1b	;K2C1B_HUMAN	445;445	TRUE	_LLRDYQAM[Oxidation (M)]LGVK_		485.732	308.123	202.468	175.308
KRT77	Homo sapiens	Keratin, type II cytoskeletal 1b;Keratin, type II cytoskeletal 1b	;K2C1B_HUMAN	242;242	TRUE	_SMQDVVEDYKSK_		162.439	106.666	51.5305
KRT77	Homo sapiens	Keratin, type II cytoskeletal 1b;Keratin, type II cytoskeletal 1b	;K2C1B_HUMAN	274;274	TRUE	_DVDAAYVSKVDLESR_		424.792	155.252		103.37
KRT77	Homo sapiens	Keratin, type II cytoskeletal 1b;Keratin, type II cytoskeletal 1b	;K2C1B_HUMAN	380;380	TRUE	_MEIAELNR_		2574.16	1480.51	1066.45	805.158
KRT77	Homo sapiens	Keratin, type II cytoskeletal 1b;Keratin, type II cytoskeletal 1b	;K2C1B_HUMAN	380;380	TRUE	_M[Oxidation (M)]EIAELNR_		2574.16	1480.51	1066.45	805.158
KRT77	Homo sapiens	Keratin, type II cytoskeletal 1b;Keratin, type II cytoskeletal 1b	;K2C1B_HUMAN	224;224	TRUE	_RQVDLLSAEQM[Oxidation (M)]R_		281.017
KRT4	Homo sapiens	Keratin, type II cytoskeletal 4;Keratin, type II cytoskeletal 4	;K2C4_HUMAN	444;430	FALSE	_LALDIEIATYRK_		7585.95	14387.3	18821.8	15673.8
KRT4	Homo sapiens	Keratin, type II cytoskeletal 4;Keratin, type II cytoskeletal 4	;K2C4_HUMAN	169;155	TRUE	_VQFLEQQNK_		368.436	8586.04	7667.25	50.7524
KRT4	Homo sapiens	Keratin, type II cytoskeletal 4;Keratin, type II cytoskeletal 4	;K2C4_HUMAN	415;401	TRUE	_RVELEAALQQAKEELAR_	7.3567	45.8212	13520.1	91.8659
KRT4	Homo sapiens	Keratin, type II cytoskeletal 4;Keratin, type II cytoskeletal 4	;K2C4_HUMAN	338;324	FALSE	_AEAEALYQTK_		252.307	2614.48	448.247	307.006
KRT4	Homo sapiens	Keratin, type II cytoskeletal 4;Keratin, type II cytoskeletal 4	;K2C4_HUMAN	444;430	FALSE	_LALDIEIATYR_		82.2527	401.818	356.103	160.751
KRT4	Homo sapiens	Keratin, type II cytoskeletal 4;Keratin, type II cytoskeletal 4	;K2C4_HUMAN	261;247	TRUE	_DVDAAYLNKVELEAKVDSLNDEINFLK_		4.61244	367.909	15.2929	70.3566
KRT4	Homo sapiens	Keratin, type II cytoskeletal 4;Keratin, type II cytoskeletal 4	;K2C4_HUMAN	524;510	TRUE	_IISTTTLNK_			21144.9
KRT4	Homo sapiens	Keratin, type II cytoskeletal 4;Keratin, type II cytoskeletal 4	;K2C4_HUMAN	276;262	TRUE	_VDSLNDEINFLK_			18441	97.8887	71.6686
KRT4	Homo sapiens	Keratin, type II cytoskeletal 4;Keratin, type II cytoskeletal 4	;K2C4_HUMAN	435;421	FALSE	_EYQELMSVK_		86.1777	14220.8		112.333
KRT4	Homo sapiens	Keratin, type II cytoskeletal 4;Keratin, type II cytoskeletal 4	;K2C4_HUMAN	435;421	FALSE	_EYQELM[Oxidation (M)]SVK_		86.1777	14220.8		112.333
KRT4	Homo sapiens	Keratin, type II cytoskeletal 4;Keratin, type II cytoskeletal 4	;K2C4_HUMAN	415;401	TRUE	_RVELEAALQQAK_			5844.22	39.1691	32.5939
KRT4	Homo sapiens	Keratin, type II cytoskeletal 4;Keratin, type II cytoskeletal 4	;K2C4_HUMAN	261;247	TRUE	_DVDAAYLNKVELEAK_		4.35711	5151.31	49.3067	34.9395
KRT4	Homo sapiens	Keratin, type II cytoskeletal 4;Keratin, type II cytoskeletal 4	;K2C4_HUMAN	379;365	TRUE	_LRAEIENIKK_			3368.73
KRT4	Homo sapiens	Keratin, type II cytoskeletal 4;Keratin, type II cytoskeletal 4	;K2C4_HUMAN	455;441	FALSE	_KLLEGEEYR_			2192.3	41.1112
KRT4	Homo sapiens	Keratin, type II cytoskeletal 4;Keratin, type II cytoskeletal 4	;K2C4_HUMAN	261;247	TRUE	_DVDAAYLNK_			1855.56
KRT4	Homo sapiens	Keratin, type II cytoskeletal 4;Keratin, type II cytoskeletal 4	;K2C4_HUMAN	416;402	TRUE	_VELEAALQQAKEELAR_			1866.3
KRT4	Homo sapiens	Keratin, type II cytoskeletal 4;Keratin, type II cytoskeletal 4	;K2C4_HUMAN	239;225	TRUE	_TKYEEEINKR_			1596.23
KRT4	Homo sapiens	Keratin, type II cytoskeletal 4;Keratin, type II cytoskeletal 4	;K2C4_HUMAN	211;197	TRUE	_KQLDTLGNDKGR_		8.53678	1278.11
KRT4	Homo sapiens	Keratin, type II cytoskeletal 4;Keratin, type II cytoskeletal 4	;K2C4_HUMAN	14;14	TRUE	_GFSC[Carbamidomethyl (C)]GSAIVGGGK_			527.814	18.1223	8.59708
KRT4	Homo sapiens	Keratin, type II cytoskeletal 4;Keratin, type II cytoskeletal 4	;K2C4_HUMAN	336;322	FALSE	_SKAEAEALYQTK_		46.0167	27909.1	41.8427
KRT4	Homo sapiens	Keratin, type II cytoskeletal 4;Keratin, type II cytoskeletal 4	;K2C4_HUMAN	367;353	TRUE	_SEIAELNR_			17735.9
KRT4	Homo sapiens	Keratin, type II cytoskeletal 4;Keratin, type II cytoskeletal 4	;K2C4_HUMAN	249;235	TRUE	_TAAENDFVVLKK_		22.0771	17388.9
KRT4	Homo sapiens	Keratin, type II cytoskeletal 4;Keratin, type II cytoskeletal 4	;K2C4_HUMAN	315;301	FALSE	_NLDLDSIIAEVR_			16401	38.9009
KRT4	Homo sapiens	Keratin, type II cytoskeletal 4;Keratin, type II cytoskeletal 4	;K2C4_HUMAN	162;148	TRUE	_FASFIDKVQFLEQQNK_		135.426	6601.17	5355.93
KRT4	Homo sapiens	Keratin, type II cytoskeletal 4;Keratin, type II cytoskeletal 4	;K2C4_HUMAN	456;442	FALSE	_LLEGEEYR_			10234.7
KRT4	Homo sapiens	Keratin, type II cytoskeletal 4;Keratin, type II cytoskeletal 4	;K2C4_HUMAN	348;334	TRUE	_VQQLQISVDQHGDNLK_			8778.13		44.541
KRT4	Homo sapiens	Keratin, type II cytoskeletal 4;Keratin, type II cytoskeletal 4	;K2C4_HUMAN	60;60	TRUE	_SISMSVAGSR_			8426.7
KRT4	Homo sapiens	Keratin, type II cytoskeletal 4;Keratin, type II cytoskeletal 4	;K2C4_HUMAN	60;60	TRUE	_SISM[Oxidation (M)]SVAGSR_			8426.7
KRT4	Homo sapiens	Keratin, type II cytoskeletal 4;Keratin, type II cytoskeletal 4	;K2C4_HUMAN	249;235	TRUE	_TAAENDFVVLK_			5059.03
KRT4	Homo sapiens	Keratin, type II cytoskeletal 4;Keratin, type II cytoskeletal 4	;K2C4_HUMAN	212;198	TRUE	_QLDTLGNDKGR_			4828.92
KRT4	Homo sapiens	Keratin, type II cytoskeletal 4;Keratin, type II cytoskeletal 4	;K2C4_HUMAN	197;183	TRUE	_NLEPLFETYLSVLR_		65.4443	3159.77		38.9252
KRT4	Homo sapiens	Keratin, type II cytoskeletal 4;Keratin, type II cytoskeletal 4	;K2C4_HUMAN	229;215	TRUE	_TMQDSVEDFK_			2870.93
KRT4	Homo sapiens	Keratin, type II cytoskeletal 4;Keratin, type II cytoskeletal 4	;K2C4_HUMAN	229;215	TRUE	_TM[Oxidation (M)]QDSVEDFK_			2870.93
KRT4	Homo sapiens	Keratin, type II cytoskeletal 4;Keratin, type II cytoskeletal 4	;K2C4_HUMAN	27;27	TRUE	_RGAFSSVSM[Oxidation (M)]SGGAGR_			2073.61		43.8625
KRT4	Homo sapiens	Keratin, type II cytoskeletal 4;Keratin, type II cytoskeletal 4	;K2C4_HUMAN	27;27	TRUE	_RGAFSSVSMSGGAGR_			2073.61		43.8625
KRT4	Homo sapiens	Keratin, type II cytoskeletal 4;Keratin, type II cytoskeletal 4	;K2C4_HUMAN	364;350	TRUE	_NTKSEIAELNR_			1622.57
KRT4	Homo sapiens	Keratin, type II cytoskeletal 4;Keratin, type II cytoskeletal 4	;K2C4_HUMAN	432;418	TRUE	_MLREYQELM[Oxidation (M)]SVK_			1540.08	44.0179
KRT4	Homo sapiens	Keratin, type II cytoskeletal 4;Keratin, type II cytoskeletal 4	;K2C4_HUMAN	432;418	TRUE	_MLREYQELMSVK_			1540.08	44.0179
KRT4	Homo sapiens	Keratin, type II cytoskeletal 4;Keratin, type II cytoskeletal 4	;K2C4_HUMAN	432;418	TRUE	_M[Oxidation (M)]LREYQELMSVK_			1540.08	44.0179
KRT4	Homo sapiens	Keratin, type II cytoskeletal 4;Keratin, type II cytoskeletal 4	;K2C4_HUMAN	348;334	TRUE	_VQQLQISVDQHGDNLKNTK_		14.5226	1039.9
KRT4	Homo sapiens	Keratin, type II cytoskeletal 4;Keratin, type II cytoskeletal 4	;K2C4_HUMAN	197;183	TRUE	_NLEPLFETYLSVLRK_			900.906		31.6863
KRT4	Homo sapiens	Keratin, type II cytoskeletal 4;Keratin, type II cytoskeletal 4	;K2C4_HUMAN	212;198	TRUE	_QLDTLGNDK_			926.18	3.97701
KRT4	Homo sapiens	Keratin, type II cytoskeletal 4;Keratin, type II cytoskeletal 4	;K2C4_HUMAN	260;246	TRUE	_KDVDAAYLNKVELEAK_			303.629
KRT4	Homo sapiens	Keratin, type II cytoskeletal 4;Keratin, type II cytoskeletal 4	;K2C4_HUMAN	288;274	TRUE	_VLYDAELSQM[Oxidation (M)]QTHVSDTSVVLSMDNNR_		16.1816	320.274
KRT4	Homo sapiens	Keratin, type II cytoskeletal 4;Keratin, type II cytoskeletal 4	;K2C4_HUMAN	404;390	TRUE	_GENALKDAHSK_			75.4082		119.661
KRT4	Homo sapiens	Keratin, type II cytoskeletal 4;Keratin, type II cytoskeletal 4	;K2C4_HUMAN	379;365	TRUE	_LRAEIENIK_		27.2819	113.868
KRT4	Homo sapiens	Keratin, type II cytoskeletal 4;Keratin, type II cytoskeletal 4	;K2C4_HUMAN	241;227	FALSE	_YEEEINKR_			125.178
KRT4	Homo sapiens	Keratin, type II cytoskeletal 4;Keratin, type II cytoskeletal 4	;K2C4_HUMAN	183;169	TRUE	_WNLLQQQTTTTSSK_			25072.7
KRT4	Homo sapiens	Keratin, type II cytoskeletal 4;Keratin, type II cytoskeletal 4	;K2C4_HUMAN	28;28	TRUE	_GAFSSVSM[Oxidation (M)]SGGAGR_			19624.8
KRT4	Homo sapiens	Keratin, type II cytoskeletal 4;Keratin, type II cytoskeletal 4	;K2C4_HUMAN	28;28	TRUE	_GAFSSVSMSGGAGR_			19624.8
KRT4	Homo sapiens	Keratin, type II cytoskeletal 4;Keratin, type II cytoskeletal 4	;K2C4_HUMAN	229;215	TRUE	_TMQDSVEDFKTK_			2059.14
KRT4	Homo sapiens	Keratin, type II cytoskeletal 4;Keratin, type II cytoskeletal 4	;K2C4_HUMAN	229;215	TRUE	_TM[Oxidation (M)]QDSVEDFKTK_			2059.14
KRT4	Homo sapiens	Keratin, type II cytoskeletal 4;Keratin, type II cytoskeletal 4	;K2C4_HUMAN	381;367	TRUE	_AEIENIK_			1815.95
KRT4	Homo sapiens	Keratin, type II cytoskeletal 4;Keratin, type II cytoskeletal 4	;K2C4_HUMAN	524;510	TRUE	_IISTTTLNKR_			1358.4
KRT4	Homo sapiens	Keratin, type II cytoskeletal 4;Keratin, type II cytoskeletal 4	;K2C4_HUMAN	14;14	TRUE	_GFSC[Carbamidomethyl (C)]GSAIVGGGKR_			449.667
KRT4	Homo sapiens	Keratin, type II cytoskeletal 4;Keratin, type II cytoskeletal 4	;K2C4_HUMAN	416;402	TRUE	_VELEAALQQAK_			279.112
KRT4	Homo sapiens	Keratin, type II cytoskeletal 4;Keratin, type II cytoskeletal 4	;K2C4_HUMAN	381;367	TRUE	_AEIENIKK_			137.531
KRT4	Homo sapiens	Keratin, type II cytoskeletal 4;Keratin, type II cytoskeletal 4	;K2C4_HUMAN	223;209	TRUE	_LQSELKTM[Oxidation (M)]QDSVEDFK_			101.018
KRT4	Homo sapiens	Keratin, type II cytoskeletal 4;Keratin, type II cytoskeletal 4	;K2C4_HUMAN	211;197	TRUE	_KQLDTLGNDK_			83.311
KRT5	Homo sapiens	Keratin, type II cytoskeletal 5;Keratin, type II cytoskeletal 5	;K2C5_HUMAN	49;49	TRUE	_VSLAGAC[Carbamidomethyl (C)]GVGGYGSR_	19.0759	1448.86	16058.3	1748.96	1383.97
KRT5	Homo sapiens	Keratin, type II cytoskeletal 5;Keratin, type II cytoskeletal 5	;K2C5_HUMAN	278;278	TRUE	_DVDAAYMNKVELEAKVDALMDEINFMK_	19.9244	62.9039	296.143	162.596	40.3772
KRT5	Homo sapiens	Keratin, type II cytoskeletal 5;Keratin, type II cytoskeletal 5	;K2C5_HUMAN	278;278	TRUE	_DVDAAYMNKVELEAKVDALM[Oxidation (M)]DEINFMK_	19.9244	62.9039	296.143	162.596	40.3772
KRT5	Homo sapiens	Keratin, type II cytoskeletal 5;Keratin, type II cytoskeletal 5	;K2C5_HUMAN	74;74	TRUE	_ISISTSGGSFR_		34451.2	73584.5	82275.5	30497.8
KRT5	Homo sapiens	Keratin, type II cytoskeletal 5;Keratin, type II cytoskeletal 5	;K2C5_HUMAN	344;344	TRUE	_AQYEEIANR_		31182.7	70669.8	79563.3	25838.7
KRT5	Homo sapiens	Keratin, type II cytoskeletal 5;Keratin, type II cytoskeletal 5	;K2C5_HUMAN	432;432	TRUE	_LAELEEALQK_		16666.6	72788.5	61621.7	21941.9
KRT5	Homo sapiens	Keratin, type II cytoskeletal 5;Keratin, type II cytoskeletal 5	;K2C5_HUMAN	365;365	TRUE	_YEELQQTAGR_		16664.6	51528.6	63868.3	20690.7
KRT5	Homo sapiens	Keratin, type II cytoskeletal 5;Keratin, type II cytoskeletal 5	;K2C5_HUMAN	430;430	TRUE	_NKLAELEEALQK_		10324.4	58285.8	48496.5	12753.9
KRT5	Homo sapiens	Keratin, type II cytoskeletal 5;Keratin, type II cytoskeletal 5	;K2C5_HUMAN	64;64	TRUE	_SLYNLGGSK_		14231.6	45373.5	48270.4	15135.7
KRT5	Homo sapiens	Keratin, type II cytoskeletal 5;Keratin, type II cytoskeletal 5	;K2C5_HUMAN	293;293	TRUE	_VDALMDEINFMK_		14385.9	50137.8	30559.5	13916.2
KRT5	Homo sapiens	Keratin, type II cytoskeletal 5;Keratin, type II cytoskeletal 5	;K2C5_HUMAN	293;293	TRUE	_VDALM[Oxidation (M)]DEINFMK_		14385.9	50137.8	30559.5	13916.2
KRT5	Homo sapiens	Keratin, type II cytoskeletal 5;Keratin, type II cytoskeletal 5	;K2C5_HUMAN	293;293	TRUE	_VDALM[Oxidation (M)]DEINFM[Oxidation (M)]K_		14385.9	50137.8	30559.5	13916.2
KRT5	Homo sapiens	Keratin, type II cytoskeletal 5;Keratin, type II cytoskeletal 5	;K2C5_HUMAN	293;293	TRUE	_VDALMDEINFM[Oxidation (M)]K_		14385.9	50137.8	30559.5	13916.2
KRT5	Homo sapiens	Keratin, type II cytoskeletal 5;Keratin, type II cytoskeletal 5	;K2C5_HUMAN	266;266	TRUE	_TTAENEFVM[Oxidation (M)]LK_		14198	36684.4	28133.2	13772.5
KRT5	Homo sapiens	Keratin, type II cytoskeletal 5;Keratin, type II cytoskeletal 5	;K2C5_HUMAN	266;266	TRUE	_TTAENEFVMLK_		14198	36684.4	28133.2	13772.5
KRT5	Homo sapiens	Keratin, type II cytoskeletal 5;Keratin, type II cytoskeletal 5	;K2C5_HUMAN	452;452	TRUE	_EYQELMNTK_		8222.26	35991.7	33283.1	10227.8
KRT5	Homo sapiens	Keratin, type II cytoskeletal 5;Keratin, type II cytoskeletal 5	;K2C5_HUMAN	452;452	TRUE	_EYQELM[Oxidation (M)]NTK_		8222.26	35991.7	33283.1	10227.8
KRT5	Homo sapiens	Keratin, type II cytoskeletal 5;Keratin, type II cytoskeletal 5	;K2C5_HUMAN	266;266	TRUE	_TTAENEFVMLKK_		14174	31214	23377.2	6700.06
KRT5	Homo sapiens	Keratin, type II cytoskeletal 5;Keratin, type II cytoskeletal 5	;K2C5_HUMAN	266;266	TRUE	_TTAENEFVM[Oxidation (M)]LKK_		14174	31214	23377.2	6700.06
KRT5	Homo sapiens	Keratin, type II cytoskeletal 5;Keratin, type II cytoskeletal 5	;K2C5_HUMAN	353;353	TRUE	_SRTEAESWYQTKYEELQQTAGR_		11403.8	26450.2	18860.9	6734.84
KRT5	Homo sapiens	Keratin, type II cytoskeletal 5;Keratin, type II cytoskeletal 5	;K2C5_HUMAN	353;353	TRUE	_SRTEAESWYQTK_		7467.26	21155	26683.6	6805.44
KRT5	Homo sapiens	Keratin, type II cytoskeletal 5;Keratin, type II cytoskeletal 5	;K2C5_HUMAN	4;4	TRUE	_QSSVSFR_		2842.05	12126.1	10964.2	3844.72
KRT5	Homo sapiens	Keratin, type II cytoskeletal 5;Keratin, type II cytoskeletal 5	;K2C5_HUMAN	246;246	TRUE	_NMQDLVEDFK_		2834.07	11973.1	8908.65	4352.35
KRT5	Homo sapiens	Keratin, type II cytoskeletal 5;Keratin, type II cytoskeletal 5	;K2C5_HUMAN	246;246	TRUE	_NM[Oxidation (M)]QDLVEDFK_		2834.07	11973.1	8908.65	4352.35
KRT5	Homo sapiens	Keratin, type II cytoskeletal 5;Keratin, type II cytoskeletal 5	;K2C5_HUMAN	449;449	TRUE	_LLREYQELMNTK_		2853.34	10800.7	10495	2737.84
KRT5	Homo sapiens	Keratin, type II cytoskeletal 5;Keratin, type II cytoskeletal 5	;K2C5_HUMAN	449;449	TRUE	_LLREYQELM[Oxidation (M)]NTK_		2853.34	10800.7	10495	2737.84
KRT5	Homo sapiens	Keratin, type II cytoskeletal 5;Keratin, type II cytoskeletal 5	;K2C5_HUMAN	355;355	TRUE	_TEAESWYQTK_		3026.78	8523.7	10409.5	3677.4
KRT5	Homo sapiens	Keratin, type II cytoskeletal 5;Keratin, type II cytoskeletal 5	;K2C5_HUMAN	73;73	TRUE	_RISISTSGGSFR_		2890.94	8456.34	8122.29	2689.08
KRT5	Homo sapiens	Keratin, type II cytoskeletal 5;Keratin, type II cytoskeletal 5	;K2C5_HUMAN	560;560	TRUE	_GLGVGFGSGGGSSSSVK_		841.797	8900.41	5931.83	1631.94
KRT5	Homo sapiens	Keratin, type II cytoskeletal 5;Keratin, type II cytoskeletal 5	;K2C5_HUMAN	381;381	TRUE	_NTKHEISEMNR_		1236.72	5589.06	5308.09	1282.19
KRT5	Homo sapiens	Keratin, type II cytoskeletal 5;Keratin, type II cytoskeletal 5	;K2C5_HUMAN	381;381	TRUE	_NTKHEISEM[Oxidation (M)]NR_		1236.72	5589.06	5308.09	1282.19
KRT5	Homo sapiens	Keratin, type II cytoskeletal 5;Keratin, type II cytoskeletal 5	;K2C5_HUMAN	396;396	TRUE	_LRAEIDNVKK_		852.356	4164.08	3533.81	1078.62
KRT5	Homo sapiens	Keratin, type II cytoskeletal 5;Keratin, type II cytoskeletal 5	;K2C5_HUMAN	64;64	TRUE	_SLYNLGGSKR_		1462.59	2795.93	2680	1264.45
KRT5	Homo sapiens	Keratin, type II cytoskeletal 5;Keratin, type II cytoskeletal 5	;K2C5_HUMAN	384;384	TRUE	_HEISEMNR_		563.626	3084.36	2853.65	634.474
KRT5	Homo sapiens	Keratin, type II cytoskeletal 5;Keratin, type II cytoskeletal 5	;K2C5_HUMAN	38;38	TRUE	_SGGGGGGGFGR_		222.649	1934.51	2035.52	402.575
KRT5	Homo sapiens	Keratin, type II cytoskeletal 5;Keratin, type II cytoskeletal 5	;K2C5_HUMAN	577;577	TRUE	_FVSTTSSSR_		359.495	3187.6	247.755	219.036
KRT5	Homo sapiens	Keratin, type II cytoskeletal 5;Keratin, type II cytoskeletal 5	;K2C5_HUMAN	398;398	TRUE	_AEIDNVK_		545.952	1979.48	1204.63	18.4868
KRT5	Homo sapiens	Keratin, type II cytoskeletal 5;Keratin, type II cytoskeletal 5	;K2C5_HUMAN	406;406	TRUE	_QC[Carbamidomethyl (C)]ANLQNAIADAEQR_		67.378	2396.75	201.553	233.955
KRT5	Homo sapiens	Keratin, type II cytoskeletal 5;Keratin, type II cytoskeletal 5	;K2C5_HUMAN	375;375	TRUE	_HGDDLRNTKHEISEM[Oxidation (M)]NR_		442.127	1336.62	815.416	47.2679
KRT5	Homo sapiens	Keratin, type II cytoskeletal 5;Keratin, type II cytoskeletal 5	;K2C5_HUMAN	375;375	TRUE	_HGDDLRNTKHEISEMNR_		442.127	1336.62	815.416	47.2679
KRT5	Homo sapiens	Keratin, type II cytoskeletal 5;Keratin, type II cytoskeletal 5	;K2C5_HUMAN	332;332	TRUE	_NLDLDSIIAEVKAQYEEIANR_		355.031	875.57	430.024	170.58
KRT5	Homo sapiens	Keratin, type II cytoskeletal 5;Keratin, type II cytoskeletal 5	;K2C5_HUMAN	246;246	TRUE	_NMQDLVEDFKNK_		70.5364	612.421	726.838	154.351
KRT5	Homo sapiens	Keratin, type II cytoskeletal 5;Keratin, type II cytoskeletal 5	;K2C5_HUMAN	405;405	TRUE	_KQC[Carbamidomethyl (C)]ANLQNAIADAEQR_		48.2594	1214.29
KRT5	Homo sapiens	Keratin, type II cytoskeletal 5;Keratin, type II cytoskeletal 5	;K2C5_HUMAN	396;396	TRUE	_LRAEIDNVK_		62.2749	576.543	493.642	125.639
KRT5	Homo sapiens	Keratin, type II cytoskeletal 5;Keratin, type II cytoskeletal 5	;K2C5_HUMAN	406;406	TRUE	_QC[Carbamidomethyl (C)]ANLQNAIADAEQRGELALKDAR_		82.6123	956.501	86.5502
KRT5	Homo sapiens	Keratin, type II cytoskeletal 5;Keratin, type II cytoskeletal 5	;K2C5_HUMAN	287;287	TRUE	_VELEAKVDALMDEINFMK_		34.3469	320.837	87.7616	133.171
KRT5	Homo sapiens	Keratin, type II cytoskeletal 5;Keratin, type II cytoskeletal 5	;K2C5_HUMAN	287;287	TRUE	_VELEAKVDALM[Oxidation (M)]DEINFMK_		34.3469	320.837	87.7616	133.171
KRT5	Homo sapiens	Keratin, type II cytoskeletal 5;Keratin, type II cytoskeletal 5	;K2C5_HUMAN	305;305	TRUE	_MFFDAELSQMQTHVSDTSVVLSMDNNR_	18.0832	48.8204	190.753	216.981	112.329
KRT5	Homo sapiens	Keratin, type II cytoskeletal 5;Keratin, type II cytoskeletal 5	;K2C5_HUMAN	305;305	TRUE	_M[Oxidation (M)]FFDAELSQMQTHVSDTSVVLSMDNNR_	18.0832	48.8204	190.753	216.981	112.329
KRT5	Homo sapiens	Keratin, type II cytoskeletal 5;Keratin, type II cytoskeletal 5	;K2C5_HUMAN	398;398	TRUE	_AEIDNVKK_			236.376	100.204	42.2783
KRT5	Homo sapiens	Keratin, type II cytoskeletal 5;Keratin, type II cytoskeletal 5	;K2C5_HUMAN	16;16	TRUE	_SFSTASAITPSVSR_		16847.6	75380.4	73469.4	29424.5
KRT5	Homo sapiens	Keratin, type II cytoskeletal 5;Keratin, type II cytoskeletal 5	;K2C5_HUMAN	30;30	TRUE	_TSFTSVSR_		11062.6	39947	37416.5	13573.3
KRT5	Homo sapiens	Keratin, type II cytoskeletal 5;Keratin, type II cytoskeletal 5	;K2C5_HUMAN	355;355	TRUE	_TEAESWYQTKYEELQQTAGR_		5976.04	15115.6	9137.81	2568.83
KRT5	Homo sapiens	Keratin, type II cytoskeletal 5;Keratin, type II cytoskeletal 5	;K2C5_HUMAN	406;406	TRUE	_QC[Carbamidomethyl (C)]ANLQNAIADAEQRGELALK_			281.077	68.4698	33.8575
KRT5	Homo sapiens	Keratin, type II cytoskeletal 5;Keratin, type II cytoskeletal 5	;K2C5_HUMAN	166;166	TRUE	_TEEREQIKTLNNK_		125.101	109.819	127.655
KRT6A	Homo sapiens	Keratin, type II cytoskeletal 6A;Keratin, type II cytoskeletal 6A	;K2C6A_HUMAN	174;174	FALSE	_FASFIDK_		155565	424979	319498	240596
KRT6A	Homo sapiens	Keratin, type II cytoskeletal 6A;Keratin, type II cytoskeletal 6A	;K2C6A_HUMAN	195;195	FALSE	_WTLLQEQGTK_		77712.2	317630	299858	89868.8
KRT6A	Homo sapiens	Keratin, type II cytoskeletal 6A;Keratin, type II cytoskeletal 6A	;K2C6A_HUMAN	339;339	FALSE	_AQYEEIAQR_		109377	302515	206672	120994
KRT6A	Homo sapiens	Keratin, type II cytoskeletal 6A;Keratin, type II cytoskeletal 6A	;K2C6A_HUMAN	327;327	FALSE	_NLDLDSIIAEVK_	61.3785	91235.8	273471	133605	92130.5
KRT6A	Homo sapiens	Keratin, type II cytoskeletal 6A;Keratin, type II cytoskeletal 6A	;K2C6A_HUMAN	251;251	FALSE	_NKYEDEINKR_	4.65113	44702.4	156937	165135	56003
KRT6A	Homo sapiens	Keratin, type II cytoskeletal 6A;Keratin, type II cytoskeletal 6A	;K2C6A_HUMAN	183;183	FALSE	_FLEQQNK_		59499	124406	109276	65867.5
KRT6A	Homo sapiens	Keratin, type II cytoskeletal 6A;Keratin, type II cytoskeletal 6A	;K2C6A_HUMAN	447;447	FALSE	_EYQELMNVK_		63075.1	82133	107733	92210
KRT6A	Homo sapiens	Keratin, type II cytoskeletal 6A;Keratin, type II cytoskeletal 6A	;K2C6A_HUMAN	447;447	FALSE	_EYQELM[Oxidation (M)]NVK_		63075.1	82133	107733	92210
KRT6A	Homo sapiens	Keratin, type II cytoskeletal 6A;Keratin, type II cytoskeletal 6A	;K2C6A_HUMAN	208;208	FALSE	_QNLEPLFEQYINNLRR_		32192.7	139307	102581	56231.8
KRT6A	Homo sapiens	Keratin, type II cytoskeletal 6A;Keratin, type II cytoskeletal 6A	;K2C6A_HUMAN	425;425	FALSE	_NKLEGLEDALQK_		10871.8	163606	105312	30025.2
KRT6A	Homo sapiens	Keratin, type II cytoskeletal 6A;Keratin, type II cytoskeletal 6A	;K2C6A_HUMAN	224;224	FALSE	_QLDSIVGER_		37387.5	115826	91332	44381.9
KRT6A	Homo sapiens	Keratin, type II cytoskeletal 6A;Keratin, type II cytoskeletal 6A	;K2C6A_HUMAN	288;288	FALSE	_ADTLTDEINFLR_		22340.4	133384	80058.6	35370.6
KRT6A	Homo sapiens	Keratin, type II cytoskeletal 6A;Keratin, type II cytoskeletal 6A	;K2C6A_HUMAN	360;360	FALSE	_YEELQVTAGR_		12575.9	105072	104023	42337.4
KRT6A	Homo sapiens	Keratin, type II cytoskeletal 6A;Keratin, type II cytoskeletal 6A	;K2C6A_HUMAN	456;456	FALSE	_LALDVEIATYR_	231.072	25972.2	113996	70307.1	42921.6
KRT6A	Homo sapiens	Keratin, type II cytoskeletal 6A;Keratin, type II cytoskeletal 6A	;K2C6A_HUMAN	261;261	FALSE	_TAAENEFVTLKK_		16721.2	108279	72807.9	27540.8
KRT6A	Homo sapiens	Keratin, type II cytoskeletal 6A;Keratin, type II cytoskeletal 6A	;K2C6A_HUMAN	31;31	TRUE	_SGFSSVSVSR_		18793.7	83174.8	72269.9	30311.4
KRT6A	Homo sapiens	Keratin, type II cytoskeletal 6A;Keratin, type II cytoskeletal 6A	;K2C6A_HUMAN	534;534	FALSE	_AIGGGLSSVGGGSSTIK_	44.2019	11061.4	89340.4	68751.5	20814.1
KRT6A	Homo sapiens	Keratin, type II cytoskeletal 6A;Keratin, type II cytoskeletal 6A	;K2C6A_HUMAN	174;174	FALSE	_FASFIDKVR_		26457.6	57271.4	48392.8	25737.6
KRT6A	Homo sapiens	Keratin, type II cytoskeletal 6A;Keratin, type II cytoskeletal 6A	;K2C6A_HUMAN	376;376	FALSE	_NTKQEIAEINR_		7034.36	69032.3	52485.9	12319.9
KRT6A	Homo sapiens	Keratin, type II cytoskeletal 6A;Keratin, type II cytoskeletal 6A	;K2C6A_HUMAN	60;60	FALSE	_SLYGLGGSK_		10646.8	55140.7	56682.2	17081.9
KRT6A	Homo sapiens	Keratin, type II cytoskeletal 6A;Keratin, type II cytoskeletal 6A	;K2C6A_HUMAN	208;208	FALSE	_QNLEPLFEQYINNLR_		9944.65	58200.7	33979	18955.2
KRT6A	Homo sapiens	Keratin, type II cytoskeletal 6A;Keratin, type II cytoskeletal 6A	;K2C6A_HUMAN	261;261	FALSE	_TAAENEFVTLK_		8078.5	53533.1	35353.3	17895
KRT6A	Homo sapiens	Keratin, type II cytoskeletal 6A;Keratin, type II cytoskeletal 6A	;K2C6A_HUMAN	348;348	FALSE	_SRAEAESWYQTK_		5257.27	43526.6	47754.7	15453.3
KRT6A	Homo sapiens	Keratin, type II cytoskeletal 6A;Keratin, type II cytoskeletal 6A	;K2C6A_HUMAN	456;456	FALSE	_LALDVEIATYRK_	44.4398	10502.5	48681.7	31453.9	15123.8
KRT6A	Homo sapiens	Keratin, type II cytoskeletal 6A;Keratin, type II cytoskeletal 6A	;K2C6A_HUMAN	273;273	FALSE	_DVDAAYMNKVELQAK_	196.838	5479.86	46700.5	33725.2	11604.2
KRT6A	Homo sapiens	Keratin, type II cytoskeletal 6A;Keratin, type II cytoskeletal 6A	;K2C6A_HUMAN	273;273	FALSE	_DVDAAYM[Oxidation (M)]NKVELQAK_	196.838	5479.86	46700.5	33725.2	11604.2
KRT6A	Homo sapiens	Keratin, type II cytoskeletal 6A;Keratin, type II cytoskeletal 6A	;K2C6A_HUMAN	444;444	FALSE	_LLKEYQELMNVK_		3133.8	46730.5	35656	8063.14
KRT6A	Homo sapiens	Keratin, type II cytoskeletal 6A;Keratin, type II cytoskeletal 6A	;K2C6A_HUMAN	444;444	FALSE	_LLKEYQELM[Oxidation (M)]NVK_		3133.8	46730.5	35656	8063.14
KRT6A	Homo sapiens	Keratin, type II cytoskeletal 6A;Keratin, type II cytoskeletal 6A	;K2C6A_HUMAN	60;60	FALSE	_SLYGLGGSKR_		9770.98	21955.5	25387.5	9614.22
KRT6A	Homo sapiens	Keratin, type II cytoskeletal 6A;Keratin, type II cytoskeletal 6A	;K2C6A_HUMAN	379;379	FALSE	_QEIAEINR_		2675.53	28556.8	19681.5	4254.46
KRT6A	Homo sapiens	Keratin, type II cytoskeletal 6A;Keratin, type II cytoskeletal 6A	;K2C6A_HUMAN	2;2	FALSE	_[Acetyl (Protein N-term)]ASTSTTIR_		4564.4	20833.7	17675	6919.97
KRT6A	Homo sapiens	Keratin, type II cytoskeletal 6A;Keratin, type II cytoskeletal 6A	;K2C6A_HUMAN	241;241	TRUE	_GMQDLVEDFK_		1623.37	21829.1	15024.2	4905.68
KRT6A	Homo sapiens	Keratin, type II cytoskeletal 6A;Keratin, type II cytoskeletal 6A	;K2C6A_HUMAN	241;241	TRUE	_GM[Oxidation (M)]QDLVEDFK_		1623.37	21829.1	15024.2	4905.68
KRT6A	Homo sapiens	Keratin, type II cytoskeletal 6A;Keratin, type II cytoskeletal 6A	;K2C6A_HUMAN	350;350	FALSE	_AEAESWYQTK_		1737.47	15971.5	17669.4	5655.18
KRT6A	Homo sapiens	Keratin, type II cytoskeletal 6A;Keratin, type II cytoskeletal 6A	;K2C6A_HUMAN	273;273	FALSE	_DVDAAYMNK_		2263.35	16307.8	13283.5	4458.37
KRT6A	Homo sapiens	Keratin, type II cytoskeletal 6A;Keratin, type II cytoskeletal 6A	;K2C6A_HUMAN	273;273	FALSE	_DVDAAYM[Oxidation (M)]NK_		2263.35	16307.8	13283.5	4458.37
KRT6A	Homo sapiens	Keratin, type II cytoskeletal 6A;Keratin, type II cytoskeletal 6A	;K2C6A_HUMAN	348;348	FALSE	_SRAEAESWYQTKYEELQVTAGR_	37.4058	4248.3	16360.5	10753.2	3471.96
KRT6A	Homo sapiens	Keratin, type II cytoskeletal 6A;Keratin, type II cytoskeletal 6A	;K2C6A_HUMAN	468;468	FALSE	_LLEGEEC[Carbamidomethyl (C)]R_		3160.77	24324.6	2788.82	3762.48
KRT6A	Homo sapiens	Keratin, type II cytoskeletal 6A;Keratin, type II cytoskeletal 6A	;K2C6A_HUMAN	169;169	FALSE	_TLNNKFASFIDK_		8147.19	10956.4	8349.99	1384.05
KRT6A	Homo sapiens	Keratin, type II cytoskeletal 6A;Keratin, type II cytoskeletal 6A	;K2C6A_HUMAN	223;223	FALSE	_RQLDSIVGER_		3311.78	11587.3	8781.29	4340.27
KRT6A	Homo sapiens	Keratin, type II cytoskeletal 6A;Keratin, type II cytoskeletal 6A	;K2C6A_HUMAN	169;169	FALSE	_TLNNKFASFIDKVR_		6506.96	8591.09	7367.03	2238.07
KRT6A	Homo sapiens	Keratin, type II cytoskeletal 6A;Keratin, type II cytoskeletal 6A	;K2C6A_HUMAN	233;233	FALSE	_GRLDSELR_		2236.79	8148.5	6562.51	2559.47
KRT6A	Homo sapiens	Keratin, type II cytoskeletal 6A;Keratin, type II cytoskeletal 6A	;K2C6A_HUMAN	70;70	FALSE	_ISIGGGSC[Carbamidomethyl (C)]AISGGYGSR_		760.824	8440.75	2495.51	2014.83
KRT6A	Homo sapiens	Keratin, type II cytoskeletal 6A;Keratin, type II cytoskeletal 6A	;K2C6A_HUMAN	350;350	FALSE	_AEAESWYQTKYEELQVTAGR_		1623.83	6232.22	3655.27	1126.7
KRT6A	Homo sapiens	Keratin, type II cytoskeletal 6A;Keratin, type II cytoskeletal 6A	;K2C6A_HUMAN	183;183	FALSE	_FLEQQNKVLETK_		3256.58	5608.22	2192.56	902.888
KRT6A	Homo sapiens	Keratin, type II cytoskeletal 6A;Keratin, type II cytoskeletal 6A	;K2C6A_HUMAN	327;327	FALSE	_NLDLDSIIAEVKAQYEEIAQR_		3341.01	3010.25	4006.02	1030.25
KRT6A	Homo sapiens	Keratin, type II cytoskeletal 6A;Keratin, type II cytoskeletal 6A	;K2C6A_HUMAN	43;43	FALSE	_GSGGLGGAC[Carbamidomethyl (C)]GGAGFGSR_		596.351	4848.45	1523.66	1139.63
KRT6A	Homo sapiens	Keratin, type II cytoskeletal 6A;Keratin, type II cytoskeletal 6A	;K2C6A_HUMAN	253;253	FALSE	_YEDEINKR_		855.986	2583.18	2172.17	1020.69
KRT6A	Homo sapiens	Keratin, type II cytoskeletal 6A;Keratin, type II cytoskeletal 6A	;K2C6A_HUMAN	251;251	FALSE	_NKYEDEINK_		856.58	2106.39	2163.86	1240.1
KRT6A	Homo sapiens	Keratin, type II cytoskeletal 6A;Keratin, type II cytoskeletal 6A	;K2C6A_HUMAN	17;17	FALSE	_GFSANSAR_		378.371	2378.89	2938.66	510.55
KRT6A	Homo sapiens	Keratin, type II cytoskeletal 6A;Keratin, type II cytoskeletal 6A	;K2C6A_HUMAN	427;427	FALSE	_LEGLEDALQK_		124.179	3336.24	2118.23	376.987
KRT6A	Homo sapiens	Keratin, type II cytoskeletal 6A;Keratin, type II cytoskeletal 6A	;K2C6A_HUMAN	159;159	FALSE	_VRAEEREQIK_		388.55	2389.04	2608.99	473.459
KRT6A	Homo sapiens	Keratin, type II cytoskeletal 6A;Keratin, type II cytoskeletal 6A	;K2C6A_HUMAN	205;205	FALSE	_TVRQNLEPLFEQYINNLRR_		1090.43	1232.41	1283.87	719.259
KRT6A	Homo sapiens	Keratin, type II cytoskeletal 6A;Keratin, type II cytoskeletal 6A	;K2C6A_HUMAN	534;534	FALSE	_AIGGGLSSVGGGSSTIKYTTTSSSSR_		1129.47	537.33	1011.9	1556.18
KRT6A	Homo sapiens	Keratin, type II cytoskeletal 6A;Keratin, type II cytoskeletal 6A	;K2C6A_HUMAN	300;300	FALSE	_ALYDAELSQMQTHISDTSVVLSMDNNR_		101.087	1009.17	958.164	371.081
KRT6A	Homo sapiens	Keratin, type II cytoskeletal 6A;Keratin, type II cytoskeletal 6A	;K2C6A_HUMAN	300;300	FALSE	_ALYDAELSQM[Oxidation (M)]QTHISDTSVVLSMDNNR_		101.087	1009.17	958.164	371.081
KRT6A	Homo sapiens	Keratin, type II cytoskeletal 6A;Keratin, type II cytoskeletal 6A	;K2C6A_HUMAN	300;300	FALSE	_ALYDAELSQMQTHISDTSVVLSM[Oxidation (M)]DNNR_		101.087	1009.17	958.164	371.081
KRT6A	Homo sapiens	Keratin, type II cytoskeletal 6A;Keratin, type II cytoskeletal 6A	;K2C6A_HUMAN	467;467	FALSE	_KLLEGEEC[Carbamidomethyl (C)]R_		109.196	1852.65	181.492	286.741
KRT6A	Homo sapiens	Keratin, type II cytoskeletal 6A;Keratin, type II cytoskeletal 6A	;K2C6A_HUMAN	391;391	FALSE	_LRSEIDHVKK_		32.2095	868.875	850.128	200.079
KRT6A	Homo sapiens	Keratin, type II cytoskeletal 6A;Keratin, type II cytoskeletal 6A	;K2C6A_HUMAN	272;272	FALSE	_KDVDAAYMNK_		28.9707	746.643	693.419	126.162
KRT6A	Homo sapiens	Keratin, type II cytoskeletal 6A;Keratin, type II cytoskeletal 6A	;K2C6A_HUMAN	253;253	FALSE	_YEDEINK_		145.154	235.113	158.736	925.742
KRT6A	Homo sapiens	Keratin, type II cytoskeletal 6A;Keratin, type II cytoskeletal 6A	;K2C6A_HUMAN	195;195	FALSE	_WTLLQEQGTKTVR_		253.839	317.627	622.515	232.574
KRT6A	Homo sapiens	Keratin, type II cytoskeletal 6A;Keratin, type II cytoskeletal 6A	;K2C6A_HUMAN	401;401	FALSE	_QC[Carbamidomethyl (C)]ANLQAAIADAEQR_		61.3308	929.451	296.844	38.6147
KRT6A	Homo sapiens	Keratin, type II cytoskeletal 6A;Keratin, type II cytoskeletal 6A	;K2C6A_HUMAN	551;551	FALSE	_YTTTSSSSR_		45.5658	580.24	452.884	138.559
KRT6A	Homo sapiens	Keratin, type II cytoskeletal 6A;Keratin, type II cytoskeletal 6A	;K2C6A_HUMAN	41;41	FALSE	_SRGSGGLGGAC[Carbamidomethyl (C)]GGAGFGSR_		162.212	474.323	156.391	164.589
KRT6A	Homo sapiens	Keratin, type II cytoskeletal 6A;Keratin, type II cytoskeletal 6A	;K2C6A_HUMAN	183;183	TRUE	_FLEQQNKVLETKWTLLQEQGTK_		82.3389	153.249	105.253	118.367
KRT6A	Homo sapiens	Keratin, type II cytoskeletal 6A;Keratin, type II cytoskeletal 6A	;K2C6A_HUMAN	241;241	TRUE	_GMQDLVEDFKNK_		67.6433	1336.22	1091.25	212.373
KRT6A	Homo sapiens	Keratin, type II cytoskeletal 6A;Keratin, type II cytoskeletal 6A	;K2C6A_HUMAN	241;241	TRUE	_GM[Oxidation (M)]QDLVEDFKNK_		67.6433	1336.22	1091.25	212.373
KRT6A	Homo sapiens	Keratin, type II cytoskeletal 6A;Keratin, type II cytoskeletal 6A	;K2C6A_HUMAN	272;272	FALSE	_KDVDAAYMNKVELQAK_			1286.24	920.555	85.3672
KRT6A	Homo sapiens	Keratin, type II cytoskeletal 6A;Keratin, type II cytoskeletal 6A	;K2C6A_HUMAN	425;425	FALSE	_NKLEGLEDALQKAK_		16.5785	523.398	596.343
KRT6A	Homo sapiens	Keratin, type II cytoskeletal 6A;Keratin, type II cytoskeletal 6A	;K2C6A_HUMAN	416;416	FALSE	_GEMALKDAK_			334.069	243.037	28.5556
KRT6A	Homo sapiens	Keratin, type II cytoskeletal 6A;Keratin, type II cytoskeletal 6A	;K2C6A_HUMAN	190;190	TRUE	_VLETKWTLLQEQGTK_		62.2302	411.907	126.471
KRT6A	Homo sapiens	Keratin, type II cytoskeletal 6A;Keratin, type II cytoskeletal 6A	;K2C6A_HUMAN	69;69	FALSE	_RISIGGGSC[Carbamidomethyl (C)]AISGGYGSR_			381.562	79.4438	100.116
KRT6A	Homo sapiens	Keratin, type II cytoskeletal 6A;Keratin, type II cytoskeletal 6A	;K2C6A_HUMAN	391;391	FALSE	_LRSEIDHVK_			116.675	103.145
KRT6A	Homo sapiens	Keratin, type II cytoskeletal 6A;Keratin, type II cytoskeletal 6A	;K2C6A_HUMAN	165;165	FALSE	_EQIKTLNNK_			12.3927	9.86801
KRT6B	Homo sapiens	Keratin, type II cytoskeletal 6B;Keratin, type II cytoskeletal 6B	;K2C6B_HUMAN	360;360	FALSE	_YEELQITAGR_	183.572	251115	859141	967469	293384
KRT6B	Homo sapiens	Keratin, type II cytoskeletal 6B;Keratin, type II cytoskeletal 6B	;K2C6B_HUMAN	31;31	FALSE	_SGFSSISVSR_		28407.4	86590.5	102445	42668.7
KRT6B	Homo sapiens	Keratin, type II cytoskeletal 6B;Keratin, type II cytoskeletal 6B	;K2C6B_HUMAN	224;224	TRUE	_QLDNIVGER_		5209.18	12756.7	21487.3	8097.51
KRT6B	Homo sapiens	Keratin, type II cytoskeletal 6B;Keratin, type II cytoskeletal 6B	;K2C6B_HUMAN	534;534	TRUE	_ATGGGLSSVGGGSSTIK_		2606.17	18907.8	19025.5	6154.34
KRT6B	Homo sapiens	Keratin, type II cytoskeletal 6B;Keratin, type II cytoskeletal 6B	;K2C6B_HUMAN	190;190	FALSE	_VLDTKWTLLQEQGTK_		7348.42	4743.57	5788.85	1621.75
KRT6B	Homo sapiens	Keratin, type II cytoskeletal 6B;Keratin, type II cytoskeletal 6B	;K2C6B_HUMAN	241;241	FALSE	_NMQDLVEDLK_		564.677	6847.14	7749.09	2346.19
KRT6B	Homo sapiens	Keratin, type II cytoskeletal 6B;Keratin, type II cytoskeletal 6B	;K2C6B_HUMAN	241;241	FALSE	_NM[Oxidation (M)]QDLVEDLK_		564.677	6847.14	7749.09	2346.19
KRT6B	Homo sapiens	Keratin, type II cytoskeletal 6B;Keratin, type II cytoskeletal 6B	;K2C6B_HUMAN	183;183	FALSE	_FLEQQNKVLDTK_		3574.48	2353.32	2383.72	614.78
KRT6B	Homo sapiens	Keratin, type II cytoskeletal 6B;Keratin, type II cytoskeletal 6B	;K2C6B_HUMAN	348;348	TRUE	_SRAEAESWYQTKYEELQITAGR_		454.413	1199.37	2641.55	80.8314
KRT6B	Homo sapiens	Keratin, type II cytoskeletal 6B;Keratin, type II cytoskeletal 6B	;K2C6B_HUMAN	223;223	TRUE	_RQLDNIVGER_		230.215	672.979	1751.76	313.469
KRT6B	Homo sapiens	Keratin, type II cytoskeletal 6B;Keratin, type II cytoskeletal 6B	;K2C6B_HUMAN	183;183	FALSE	_FLEQQNKVLDTKWTLLQEQGTK_		984.81	359.017	349.434	326.116
KRT6B	Homo sapiens	Keratin, type II cytoskeletal 6B;Keratin, type II cytoskeletal 6B	;K2C6B_HUMAN	241;241	FALSE	_NMQDLVEDLKNK_		116.285	587.642	441.714	152.983
KRT6B	Homo sapiens	Keratin, type II cytoskeletal 6B;Keratin, type II cytoskeletal 6B	;K2C6B_HUMAN	534;534	TRUE	_ATGGGLSSVGGGSSTIKYTTTSSSSR_		376.664	324.716	186.742	310.412
KRT6B	Homo sapiens	Keratin, type II cytoskeletal 6B;Keratin, type II cytoskeletal 6B	;K2C6B_HUMAN	350;350	TRUE	_AEAESWYQTKYEELQITAGR_		112.829	332.843	576.816
KRT71	Homo sapiens	Keratin, type II cytoskeletal 71;Keratin, type II cytoskeletal 71	;K2C71_HUMAN	150;150	FALSE	_FLEQQNQVLETK_		1967.71	7077.76	7420.13	2664.57
KRT71	Homo sapiens	Keratin, type II cytoskeletal 71;Keratin, type II cytoskeletal 71	;K2C71_HUMAN	228;228	TRUE	_TAAENEFVLLKK_		33.5302	5.03118		9.73642
KRT78	Homo sapiens	Keratin, type II cytoskeletal 78;Keratin, type II cytoskeletal 78	;K2C78_HUMAN	275;275	TRUE	_YLDFSSIITEVR_		4877.4	10928.6	6252.55	3489.68
KRT78	Homo sapiens	Keratin, type II cytoskeletal 78;Keratin, type II cytoskeletal 78	;K2C78_HUMAN	327;327	TRUE	_VQISQLHQEIQR_		2082.19	7263.37	4547.87	1789.67
KRT78	Homo sapiens	Keratin, type II cytoskeletal 78;Keratin, type II cytoskeletal 78	;K2C78_HUMAN	375;375	TRUE	_VDELEAALR_		1746.4	5586.54	4367.41	2299.04
KRT78	Homo sapiens	Keratin, type II cytoskeletal 78;Keratin, type II cytoskeletal 78	;K2C78_HUMAN	209;209	TRUE	_ATLENDFVVLKK_		2316.11	5737.03	3739.79	1260.78
KRT78	Homo sapiens	Keratin, type II cytoskeletal 78;Keratin, type II cytoskeletal 78	;K2C78_HUMAN	98;98	TRUE	_IEIDPQFQVVR_		1702.57	5700.4	3715.64	1436.84
KRT78	Homo sapiens	Keratin, type II cytoskeletal 78;Keratin, type II cytoskeletal 78	;K2C78_HUMAN	241;241	TRUE	_EYLYFLK_		1160.06	5435.7	3208.01	1528.64
KRT78	Homo sapiens	Keratin, type II cytoskeletal 78;Keratin, type II cytoskeletal 78	;K2C78_HUMAN	117;117	TRUE	_TLNNQFASFIDK_		1458.83	4301.02	3024.73	1795.25
KRT78	Homo sapiens	Keratin, type II cytoskeletal 78;Keratin, type II cytoskeletal 78	;K2C78_HUMAN	117;117	TRUE	_TLNNQFASFIDKVR_		2128.21	3944.36	1898.43	1113.16
KRT78	Homo sapiens	Keratin, type II cytoskeletal 78;Keratin, type II cytoskeletal 78	;K2C78_HUMAN	109;109	TRUE	_TQETQEIR_		1299.95	2480.39	1736.1	825.895
KRT78	Homo sapiens	Keratin, type II cytoskeletal 78;Keratin, type II cytoskeletal 78	;K2C78_HUMAN	349;349	TRUE	_QNASLQAAITDAEQR_		522.722	2652.15	1541.48	676.272
KRT78	Homo sapiens	Keratin, type II cytoskeletal 78;Keratin, type II cytoskeletal 78	;K2C78_HUMAN	172;172	TRUE	_QLEQLQGER_		638.292	2153.01	1770.75	690.642
KRT78	Homo sapiens	Keratin, type II cytoskeletal 78;Keratin, type II cytoskeletal 78	;K2C78_HUMAN	295;295	TRUE	_SSKAEAEALYQTK_		945.599	2056.86	1232.74	607.304
KRT78	Homo sapiens	Keratin, type II cytoskeletal 78;Keratin, type II cytoskeletal 78	;K2C78_HUMAN	209;209	TRUE	_ATLENDFVVLK_		769.751	1664.97	1472.86	654.242
KRT78	Homo sapiens	Keratin, type II cytoskeletal 78;Keratin, type II cytoskeletal 78	;K2C78_HUMAN	404;404	FALSE	_LSLDVEIATYR_		1051.02	1380.27	737.481	777.028
KRT78	Homo sapiens	Keratin, type II cytoskeletal 78;Keratin, type II cytoskeletal 78	;K2C78_HUMAN	230;230	TRUE	_MELEGKLEALR_		329.76	1644.17	1254.45	432.253
KRT78	Homo sapiens	Keratin, type II cytoskeletal 78;Keratin, type II cytoskeletal 78	;K2C78_HUMAN	230;230	TRUE	_M[Oxidation (M)]ELEGKLEALR_		329.76	1644.17	1254.45	432.253
KRT78	Homo sapiens	Keratin, type II cytoskeletal 78;Keratin, type II cytoskeletal 78	;K2C78_HUMAN	404;404	TRUE	_LSLDVEIATYRR_		522.548	1467.62	1202.39	447.896
KRT78	Homo sapiens	Keratin, type II cytoskeletal 78;Keratin, type II cytoskeletal 78	;K2C78_HUMAN	208;208	TRUE	_RATLENDFVVLKK_		449.2	1728.39	1089.21	342.322
KRT78	Homo sapiens	Keratin, type II cytoskeletal 78;Keratin, type II cytoskeletal 78	;K2C78_HUMAN	339;339	TRUE	_LQSQTENLK_		302.439	1198.41	786.913	337.477
KRT78	Homo sapiens	Keratin, type II cytoskeletal 78;Keratin, type II cytoskeletal 78	;K2C78_HUMAN	370;370	TRUE	_DAQAKVDELEAALR_		269.47	1254.42	616.85	328.618
KRT78	Homo sapiens	Keratin, type II cytoskeletal 78;Keratin, type II cytoskeletal 78	;K2C78_HUMAN	348;348	TRUE	_KQNASLQAAITDAEQR_		131.562	1284.72	717.836	263.505
KRT78	Homo sapiens	Keratin, type II cytoskeletal 78;Keratin, type II cytoskeletal 78	;K2C78_HUMAN	308;308	TRUE	_YQELQVSAQLHGDR_		136.939	893.645	391.207	141.719
KRT78	Homo sapiens	Keratin, type II cytoskeletal 78;Keratin, type II cytoskeletal 78	;K2C78_HUMAN	339;339	TRUE	_LQSQTENLKK_		224.342	601.267	369.236	159.427
KRT78	Homo sapiens	Keratin, type II cytoskeletal 78;Keratin, type II cytoskeletal 78	;K2C78_HUMAN	40;40	TRUE	_SLNSFGGC[Carbamidomethyl (C)]LEGSR_		12.1822	1196.66		72.9856
KRT78	Homo sapiens	Keratin, type II cytoskeletal 78;Keratin, type II cytoskeletal 78	;K2C78_HUMAN	349;349	TRUE	_QNASLQAAITDAEQRGELALK_		67.8595	463.494	217.246	118.059
KRT78	Homo sapiens	Keratin, type II cytoskeletal 78;Keratin, type II cytoskeletal 78	;K2C78_HUMAN	364;364	TRUE	_GELALKDAQAKVDELEAALR_		84.7381	143.032	94.8513	105.556
KRT78	Homo sapiens	Keratin, type II cytoskeletal 78;Keratin, type II cytoskeletal 78	;K2C78_HUMAN	53;53	TRUE	_GSTWGSGGR_		2236.33	2694.69	1668.98
KRT78	Homo sapiens	Keratin, type II cytoskeletal 78;Keratin, type II cytoskeletal 78	;K2C78_HUMAN	208;208	TRUE	_RATLENDFVVLK_		243.464	804.19	440.496
KRT78	Homo sapiens	Keratin, type II cytoskeletal 78;Keratin, type II cytoskeletal 78	;K2C78_HUMAN	392;392	TRUE	_LLC[Carbamidomethyl (C)]EYQELTSTK_		52.7144	1189.23	101.124
KRT78	Homo sapiens	Keratin, type II cytoskeletal 78;Keratin, type II cytoskeletal 78	;K2C78_HUMAN	287;287	TRUE	_ARYEEIAR_			302.968		232.575
KRT78	Homo sapiens	Keratin, type II cytoskeletal 78;Keratin, type II cytoskeletal 78	;K2C78_HUMAN	308;308	TRUE	_YQELQVSAQLHGDRM[Oxidation (M)]QETK_		120.812	907.085	544.331	85.3353
KRT78	Homo sapiens	Keratin, type II cytoskeletal 78;Keratin, type II cytoskeletal 78	;K2C78_HUMAN	308;308	TRUE	_YQELQVSAQLHGDRMQETK_		120.812	907.085	544.331	85.3353
KRT78	Homo sapiens	Keratin, type II cytoskeletal 78;Keratin, type II cytoskeletal 78	;K2C78_HUMAN	248;248	TRUE	_HLNEEELGQLQTQASDTSVVLSMDNNR_			153.361	41.6385
KRT78	Homo sapiens	Keratin, type II cytoskeletal 78;Keratin, type II cytoskeletal 78	;K2C78_HUMAN	171;171	TRUE	_KQLEQLQGER_			35.8445	48.8526
KRT80	Homo sapiens	Keratin, type II cytoskeletal 80;Keratin, type II cytoskeletal 80	;K2C80_HUMAN	297;297	TRUE	_SEIADLNVR_		1600.07	4076.88	3265.33	1124.35
KRT80	Homo sapiens	Keratin, type II cytoskeletal 80;Keratin, type II cytoskeletal 80	;K2C80_HUMAN	72;72	TRUE	_LDPAVQQLK_		1069.83	3497.4	4014.75	1001.88
KRT80	Homo sapiens	Keratin, type II cytoskeletal 80;Keratin, type II cytoskeletal 80	;K2C80_HUMAN	266;266	TRUE	_SLEEAEAYSR_		1531.79	2990.56	2691.09	857.427
KRT80	Homo sapiens	Keratin, type II cytoskeletal 80;Keratin, type II cytoskeletal 80	;K2C80_HUMAN	345;345	TRUE	_LAQLEAALQQAK_		712.615	2721.29	2287.07	825.865
KRT80	Homo sapiens	Keratin, type II cytoskeletal 80;Keratin, type II cytoskeletal 80	;K2C80_HUMAN	218;218	TRUE	_TIYEQELKDLAAQVK_		814.345	2349.97	1414.89	822.973
KRT80	Homo sapiens	Keratin, type II cytoskeletal 80;Keratin, type II cytoskeletal 80	;K2C80_HUMAN	108;108	TRUE	_NQLLETR_		932.765	1904.65	1655.24	633.167
KRT80	Homo sapiens	Keratin, type II cytoskeletal 80;Keratin, type II cytoskeletal 80	;K2C80_HUMAN	208;208	TRUE	_SLESFVELMK_		518.22	2270.32	1546.4	606.483
KRT80	Homo sapiens	Keratin, type II cytoskeletal 80;Keratin, type II cytoskeletal 80	;K2C80_HUMAN	208;208	TRUE	_SLESFVELM[Oxidation (M)]K_		518.22	2270.32	1546.4	606.483
KRT80	Homo sapiens	Keratin, type II cytoskeletal 80;Keratin, type II cytoskeletal 80	;K2C80_HUMAN	257;257	TRUE	_AQYDAVAAR_		377.376	1761.67	1668.36	504.478
KRT80	Homo sapiens	Keratin, type II cytoskeletal 80;Keratin, type II cytoskeletal 80	;K2C80_HUMAN	36;36	TRUE	_APGPGFSSR_		296.658	1210.13	1282.37	362.864
KRT80	Homo sapiens	Keratin, type II cytoskeletal 80;Keratin, type II cytoskeletal 80	;K2C80_HUMAN	285;285	TRUE	_SAEYGSSLQSSR_		464.417	1108.18	1080.44	394.401
KRT80	Homo sapiens	Keratin, type II cytoskeletal 80;Keratin, type II cytoskeletal 80	;K2C80_HUMAN	276;276	TRUE	_SQLEEQAAR_		619.493	722.124	695.433	300.251
KRT80	Homo sapiens	Keratin, type II cytoskeletal 80;Keratin, type II cytoskeletal 80	;K2C80_HUMAN	329;329	TRUE	_TAEEQGELAFQDAK_		126.194	993.695	717.053	314.664
KRT80	Homo sapiens	Keratin, type II cytoskeletal 80;Keratin, type II cytoskeletal 80	;K2C80_HUMAN	311;311	TRUE	_SQILSVK_		371.618	899.869	768.152	83.7228
KRT80	Homo sapiens	Keratin, type II cytoskeletal 80;Keratin, type II cytoskeletal 80	;K2C80_HUMAN	58;58	TRUE	_VTVNPGLLVPLDVK_		308.825	802.933	712.569	184.411
KRT80	Homo sapiens	Keratin, type II cytoskeletal 80;Keratin, type II cytoskeletal 80	;K2C80_HUMAN	169;169	TRUE	_IRYEDEISKR_		288.848	624.5	626.397	289.423
KRT80	Homo sapiens	Keratin, type II cytoskeletal 80;Keratin, type II cytoskeletal 80	;K2C80_HUMAN	89;89	TRUE	_ALNDKFASLIGK_		205.826	741.226	510.909	153.594
KRT80	Homo sapiens	Keratin, type II cytoskeletal 80;Keratin, type II cytoskeletal 80	;K2C80_HUMAN	385;385	TRUE	_KLVEGEEGRMDSPSATVVSAVQSR_		246.25	737.224	406.534	134.17
KRT80	Homo sapiens	Keratin, type II cytoskeletal 80;Keratin, type II cytoskeletal 80	;K2C80_HUMAN	218;218	TRUE	_TIYEQELK_		132.25	557.279	316.869	215.986
KRT80	Homo sapiens	Keratin, type II cytoskeletal 80;Keratin, type II cytoskeletal 80	;K2C80_HUMAN	386;386	TRUE	_LVEGEEGRM[Oxidation (M)]DSPSATVVSAVQSR_		152.501	381.254	404.604	86.0518
KRT80	Homo sapiens	Keratin, type II cytoskeletal 80;Keratin, type II cytoskeletal 80	;K2C80_HUMAN	151;151	TRUE	_GQLEANLLQVLEKVEEFR_		88.4452	194.576	287.619	139.48
KRT80	Homo sapiens	Keratin, type II cytoskeletal 80;Keratin, type II cytoskeletal 80	;K2C80_HUMAN	151;151	TRUE	_GQLEANLLQVLEK_		47.3941	286.764	227.59	115.112
KRT80	Homo sapiens	Keratin, type II cytoskeletal 80;Keratin, type II cytoskeletal 80	;K2C80_HUMAN	178;178	TRUE	_RTDMEFTFVQLK_		9.25405	356.487	233.932	28.5115
KRT80	Homo sapiens	Keratin, type II cytoskeletal 80;Keratin, type II cytoskeletal 80	;K2C80_HUMAN	178;178	TRUE	_RTDM[Oxidation (M)]EFTFVQLK_		9.25405	356.487	233.932	28.5115
KRT80	Homo sapiens	Keratin, type II cytoskeletal 80;Keratin, type II cytoskeletal 80	;K2C80_HUMAN	179;179	TRUE	_TDM[Oxidation (M)]EFTFVQLKK_		105.881	200.826	252.519	45.7684
KRT80	Homo sapiens	Keratin, type II cytoskeletal 80;Keratin, type II cytoskeletal 80	;K2C80_HUMAN	179;179	TRUE	_TDMEFTFVQLKK_		105.881	200.826	252.519	45.7684
KRT80	Homo sapiens	Keratin, type II cytoskeletal 80;Keratin, type II cytoskeletal 80	;K2C80_HUMAN	115;115	TRUE	_WSFLQGQDSAIFDLGHLYEEYQGR_		63.8693	268.857	219.749	48.1493
KRT80	Homo sapiens	Keratin, type II cytoskeletal 80;Keratin, type II cytoskeletal 80	;K2C80_HUMAN	366;366	TRUE	_YQELMNVK_		93.2071	276.013	141.057	75.011
KRT80	Homo sapiens	Keratin, type II cytoskeletal 80;Keratin, type II cytoskeletal 80	;K2C80_HUMAN	58;58	TRUE	_VTVNPGLLVPLDVKLDPAVQQLK_		67.5156	260.768	122.856	40.7229
KRT80	Homo sapiens	Keratin, type II cytoskeletal 80;Keratin, type II cytoskeletal 80	;K2C80_HUMAN	169;169	TRUE	_IRYEDEISK_		27.7662	145.636	131.279	38.6848
KRT80	Homo sapiens	Keratin, type II cytoskeletal 80;Keratin, type II cytoskeletal 80	;K2C80_HUMAN	206;206	TRUE	_LKSLESFVELMK_		45.6631	150.531	38.3941	25.4031
KRT80	Homo sapiens	Keratin, type II cytoskeletal 80;Keratin, type II cytoskeletal 80	;K2C80_HUMAN	233;233	TRUE	_DVSVTVGM[Oxidation (M)]DSR_		113.464	374.245	327.889
KRT80	Homo sapiens	Keratin, type II cytoskeletal 80;Keratin, type II cytoskeletal 80	;K2C80_HUMAN	386;386	TRUE	_LVEGEEGR_			37.5323		389.097
KRT80	Homo sapiens	Keratin, type II cytoskeletal 80;Keratin, type II cytoskeletal 80	;K2C80_HUMAN	394;394	TRUE	_MDSPSATVVSAVQSR_			187.852	87.1855
KRT80	Homo sapiens	Keratin, type II cytoskeletal 80;Keratin, type II cytoskeletal 80	;K2C80_HUMAN	365;365	TRUE	_KYQELMNVK_		72.9174	95.5161	66.4552
KRT80	Homo sapiens	Keratin, type II cytoskeletal 80;Keratin, type II cytoskeletal 80	;K2C80_HUMAN	179;179	TRUE	_TDMEFTFVQLK_			290.543	354.517	128.943
KRT80	Homo sapiens	Keratin, type II cytoskeletal 80;Keratin, type II cytoskeletal 80	;K2C80_HUMAN	179;179	TRUE	_TDM[Oxidation (M)]EFTFVQLK_			290.543	354.517	128.943
KRT80	Homo sapiens	Keratin, type II cytoskeletal 80;Keratin, type II cytoskeletal 80	;K2C80_HUMAN	45;45	TRUE	_SLTGC[Carbamidomethyl (C)]WSAGTISK_			147.43	45.1241
MIEF1	Homo sapiens	Mitochondrial ribosome and complex I assembly factor AltMIEF1	MIDUO_HUMAN	7	TRUE	_EAVLSLYR_		754.029	492.259	1074.4	656.601
MIEF1	Homo sapiens	Mitochondrial ribosome and complex I assembly factor AltMIEF1	MIDUO_HUMAN	25	TRUE	_YTDRDFYFASIR_		289.843	338.274	740.299	459.481
MIEF1	Homo sapiens	Mitochondrial ribosome and complex I assembly factor AltMIEF1	MIDUO_HUMAN	58	TRUE	_GLVFLNGK_		234.678	98.3646	152.366	170.436
KIF2A	Homo sapiens	Kinesin-like protein KIF2A	KIF2A_HUMAN	453	TRUE	_FSLIDLAGNER_		8361.82	4619.29	17427.5	6890.47
KIF2A	Homo sapiens	Kinesin-like protein KIF2A	KIF2A_HUMAN	206	TRUE	_GSLDYRPLTTADPIDEHR_		8048.72	3611.51	15047.5	5361.87
KIF2A	Homo sapiens	Kinesin-like protein KIF2A	KIF2A_HUMAN	374	TRUE	_VFDLLNR_		8524.81	3124.88	9710.32	3459.6
KIF2A	Homo sapiens	Kinesin-like protein KIF2A	KIF2A_HUMAN	515	FALSE	_DSFIGENSR_		7257.66	3446.17	10357.6	3719.85
KIF2A	Homo sapiens	Kinesin-like protein KIF2A	KIF2A_HUMAN	242	TRUE	_DLDVITIPSKDVVM[Oxidation (M)]VHEPK_		2917.94	12989.5	3823.31	3481.73
KIF2A	Homo sapiens	Kinesin-like protein KIF2A	KIF2A_HUMAN	242	TRUE	_DLDVITIPSKDVVMVHEPK_		2917.94	12989.5	3823.31	3481.73
KIF2A	Homo sapiens	Kinesin-like protein KIF2A	KIF2A_HUMAN	630	TRUE	_AVFQESIR_		6139.25	2359.48	10593.8	3821.16
KIF2A	Homo sapiens	Kinesin-like protein KIF2A	KIF2A_HUMAN	337	TRUE	_GIYALAAR_		4928.14	1899.9	7332.21	2571.59
KIF2A	Homo sapiens	Kinesin-like protein KIF2A	KIF2A_HUMAN	345	TRUE	_DVFLMLK_		5005.63	1945.34	6895.51	2546.28
KIF2A	Homo sapiens	Kinesin-like protein KIF2A	KIF2A_HUMAN	345	TRUE	_DVFLM[Oxidation (M)]LK_		5005.63	1945.34	6895.51	2546.28
KIF2A	Homo sapiens	Kinesin-like protein KIF2A	KIF2A_HUMAN	386	TRUE	_VLEDGKQQVQVVGLQER_		3443.24	1521.68	6142.04	1978.52
KIF2A	Homo sapiens	Kinesin-like protein KIF2A	KIF2A_HUMAN	671	TRUE	_IDILTELRDK_		3653.31	1362.16	5625.59	2442.1
KIF2A	Homo sapiens	Kinesin-like protein KIF2A	KIF2A_HUMAN	292	TRUE	_FTARPLVETIFER_		2988.95	1616.23	5193.24	2093.21
KIF2A	Homo sapiens	Kinesin-like protein KIF2A	KIF2A_HUMAN	276	TRUE	_FDYAFDDSAPNEMVYR_		2418.77	1069.63	3054.75	1480.53
KIF2A	Homo sapiens	Kinesin-like protein KIF2A	KIF2A_HUMAN	413	TRUE	_LIDIGNSC[Carbamidomethyl (C)]R_		2501.97	826.405	3642.57	901.426
KIF2A	Homo sapiens	Kinesin-like protein KIF2A	KIF2A_HUMAN	476	TRUE	_LEGAEINK_		2222.39	554.722	3570.13	1244.08
KIF2A	Homo sapiens	Kinesin-like protein KIF2A	KIF2A_HUMAN	671	TRUE	_IDILTELR_		1521.6	625.711	3530.78	1779.56
KIF2A	Homo sapiens	Kinesin-like protein KIF2A	KIF2A_HUMAN	296	TRUE	_PLVETIFER_		2190.29	447.311	3242.19	1408.3
KIF2A	Homo sapiens	Kinesin-like protein KIF2A	KIF2A_HUMAN	175	TRUE	_LQQQELR_		1418.7	397.008	2120.77	794.5
KIF2A	Homo sapiens	Kinesin-like protein KIF2A	KIF2A_HUMAN	686	TRUE	_AALQEEEQASK_		1538.62	433.854	2038.61	552.603
KIF2A	Homo sapiens	Kinesin-like protein KIF2A	KIF2A_HUMAN	305	FALSE	_GMATC[Carbamidomethyl (C)]FAYGQTGSGK_		1311.2	389.355	2050.68	587.197
KIF2A	Homo sapiens	Kinesin-like protein KIF2A	KIF2A_HUMAN	305	FALSE	_GM[Oxidation (M)]ATC[Carbamidomethyl (C)]FAYGQTGSGK_		1311.2	389.355	2050.68	587.197
KIF2A	Homo sapiens	Kinesin-like protein KIF2A	KIF2A_HUMAN	268	TRUE	_YLENQTFR_		1185.91	474.554	1859.87	515.241
KIF2A	Homo sapiens	Kinesin-like protein KIF2A	KIF2A_HUMAN	392	TRUE	_QQVQVVGLQER_		691.672	268.556	1756.32	808.02
KIF2A	Homo sapiens	Kinesin-like protein KIF2A	KIF2A_HUMAN	524	TRUE	_TC[Carbamidomethyl (C)]MIATISPGMASC[Carbamidomethyl (C)]ENTLNTLR_		700.779	498.276	1208.08	447.614
KIF2A	Homo sapiens	Kinesin-like protein KIF2A	KIF2A_HUMAN	524	TRUE	_TC[Carbamidomethyl (C)]M[Oxidation (M)]IATISPGMASC[Carbamidomethyl (C)]ENTLNTLR_		700.779	498.276	1208.08	447.614
KIF2A	Homo sapiens	Kinesin-like protein KIF2A	KIF2A_HUMAN	406	TRUE	_C[Carbamidomethyl (C)]VEDVLK_		796.29	292.859	1335.2	423.394
KIF2A	Homo sapiens	Kinesin-like protein KIF2A	KIF2A_HUMAN	242	TRUE	_DLDVITIPSK_		881.737	84.4108	1111.93	379.183
KIF2A	Homo sapiens	Kinesin-like protein KIF2A	KIF2A_HUMAN	97	TRUE	_TVASIKNDPPSRDNR_		390.444	214.492	667.114	95.5109
KIF2A	Homo sapiens	Kinesin-like protein KIF2A	KIF2A_HUMAN	484	FALSE	_SLLALKEC[Carbamidomethyl (C)]IR_		379.148	146.147	657.757	55.675
KIF2A	Homo sapiens	Kinesin-like protein KIF2A	KIF2A_HUMAN	374	TRUE	_VFDLLNRK_		196.943	156.547	401.859	196.35
KIF2A	Homo sapiens	Kinesin-like protein KIF2A	KIF2A_HUMAN	185	TRUE	_AQDVDATNPNYEIMC[Carbamidomethyl (C)]MIR_		183.801	92.1196	184.45	136.783
KIF2A	Homo sapiens	Kinesin-like protein KIF2A	KIF2A_HUMAN	184	TRUE	_RAQDVDATNPNYEIMC[Carbamidomethyl (C)]MIR_		357.412		314.008
KIF2A	Homo sapiens	Kinesin-like protein KIF2A	KIF2A_HUMAN	686	TRUE	_AALQEEEQASKQINPK_		385.596	192.004	589.384
KIF2A	Homo sapiens	Kinesin-like protein KIF2A	KIF2A_HUMAN	509	FALSE	_LTQVLRDSFIGENSR_			155.643	94.5209
KIF2A	Homo sapiens	Kinesin-like protein KIF2A	KIF2A_HUMAN	357	TRUE	_KLELQVYATFFEIYSGK_			6.2542	59.835
KIF2A	Homo sapiens	Kinesin-like protein KIF2A	KIF2A_HUMAN	24	TRUE	_IHQAMVTSLNEDNESVTVEWIENGDTKGK_			33.9526
TK2	Homo sapiens	Thymidine kinase 2, mitochondrial	KITM_HUMAN	244	TRUE	_MLELFEQNRDR_		455.94	266.651	587.147	311.335
TK2	Homo sapiens	Thymidine kinase 2, mitochondrial	KITM_HUMAN	141	TRUE	_YIFVENLYR_		308.366	271.265	399.964	285.517
TK2	Homo sapiens	Thymidine kinase 2, mitochondrial	KITM_HUMAN	1	TRUE	_MLLWPLR_		72.5523	97.9494	127.756	60.7665
DDX39A	Homo sapiens	ATP-dependent RNA helicase DDX39A	DX39A_HUMAN	144	TRUE	_VSVFFGGLSIK_		9795.83	11286.2	13664.7	25519.5
DDX39A	Homo sapiens	ATP-dependent RNA helicase DDX39A	DX39A_HUMAN	355	TRUE	_VNIVFNYDMPEDSDTYLHR_		9190.72	8586.2	9471.44	15241.5
DDX39A	Homo sapiens	ATP-dependent RNA helicase DDX39A	DX39A_HUMAN	355	TRUE	_VNIVFNYDM[Oxidation (M)]PEDSDTYLHR_		9190.72	8586.2	9471.44	15241.5
DDX39A	Homo sapiens	ATP-dependent RNA helicase DDX39A	DX39A_HUMAN	2	TRUE	_[Acetyl (Protein N-term)]AEQDVENDLLDYDEEEEPQAPQESTPAPPKKDIK_		5898.35	5629.03	4885.78	4279.83
DDX39A	Homo sapiens	ATP-dependent RNA helicase DDX39A	DX39A_HUMAN	163	TRUE	_NC[Carbamidomethyl (C)]PHVVVGTPGR_		4255.95	3299.15	4962.25	7111.27
DDX39A	Homo sapiens	ATP-dependent RNA helicase DDX39A	DX39A_HUMAN	222	TRUE	_QC[Carbamidomethyl (C)]MMFSATLSK_		1457.32	1592.47	2444.36	3954.69
DDX39A	Homo sapiens	ATP-dependent RNA helicase DDX39A	DX39A_HUMAN	222	TRUE	_QC[Carbamidomethyl (C)]M[Oxidation (M)]MFSATLSK_		1457.32	1592.47	2444.36	3954.69
DDX39A	Homo sapiens	ATP-dependent RNA helicase DDX39A	DX39A_HUMAN	222	TRUE	_QC[Carbamidomethyl (C)]MM[Oxidation (M)]FSATLSK_		1457.32	1592.47	2444.36	3954.69
DDX39A	Homo sapiens	ATP-dependent RNA helicase DDX39A	DX39A_HUMAN	233	TRUE	_DIRPVC[Carbamidomethyl (C)]R_		1101.64	1120.87	1568.1	2155.24
DDX39A	Homo sapiens	ATP-dependent RNA helicase DDX39A	DX39A_HUMAN	241	TRUE	_FMQDPMEVFVDDETK_		799.284	554.255	709.8	1984.73
DDX39A	Homo sapiens	ATP-dependent RNA helicase DDX39A	DX39A_HUMAN	241	TRUE	_FM[Oxidation (M)]QDPMEVFVDDETK_		799.284	554.255	709.8	1984.73
DDX39A	Homo sapiens	ATP-dependent RNA helicase DDX39A	DX39A_HUMAN	240	TRUE	_KFMQDPMEVFVDDETK_		562.242	483.366	652.091	1771.7
DDX39A	Homo sapiens	ATP-dependent RNA helicase DDX39A	DX39A_HUMAN	240	TRUE	_KFM[Oxidation (M)]QDPMEVFVDDETK_		562.242	483.366	652.091	1771.7
DDX39A	Homo sapiens	ATP-dependent RNA helicase DDX39A	DX39A_HUMAN	2	TRUE	_[Acetyl (Protein N-term)]AEQDVENDLLDYDEEEEPQAPQESTPAPPKK_		285.502	355.453	505.523	1537.18
DDX39A	Homo sapiens	ATP-dependent RNA helicase DDX39A	DX39A_HUMAN	191	TRUE	_HFVLDEC[Carbamidomethyl (C)]DKMLEQLDMR_		349.532	303.5	559.698	1164.78
DDX39A	Homo sapiens	ATP-dependent RNA helicase DDX39A	DX39A_HUMAN	191	TRUE	_HFVLDEC[Carbamidomethyl (C)]DKMLEQLDM[Oxidation (M)]R_		349.532	303.5	559.698	1164.78
DDX39A	Homo sapiens	ATP-dependent RNA helicase DDX39A	DX39A_HUMAN	144	TRUE	_VSVFFGGLSIKK_		322.635	346.244	506.154	935.176
DDX39A	Homo sapiens	ATP-dependent RNA helicase DDX39A	DX39A_HUMAN	241	TRUE	_FMQDPMEVFVDDETKLTLHGLQQYYVK_		152.279	345.987	664.67	881.974
DDX39A	Homo sapiens	ATP-dependent RNA helicase DDX39A	DX39A_HUMAN	241	TRUE	_FM[Oxidation (M)]QDPMEVFVDDETKLTLHGLQQYYVK_		152.279	345.987	664.67	881.974
DDX39A	Homo sapiens	ATP-dependent RNA helicase DDX39A	DX39A_HUMAN	162	TRUE	_KNC[Carbamidomethyl (C)]PHVVVGTPGR_		331.335	287.59	484.044	797.635
DDX39A	Homo sapiens	ATP-dependent RNA helicase DDX39A	DX39A_HUMAN	191	TRUE	_HFVLDEC[Carbamidomethyl (C)]DK_		393.394	190.844	360.116	789.703
DDX39A	Homo sapiens	ATP-dependent RNA helicase DDX39A	DX39A_HUMAN	299	TRUE	_C[Carbamidomethyl (C)]MALAQLLVEQNFPAIAIHR_		68.643	313.051	233.929	423.83
DDX39A	Homo sapiens	ATP-dependent RNA helicase DDX39A	DX39A_HUMAN	240	TRUE	_KFMQDPMEVFVDDETKLTLHGLQQYYVK_		3.62959	46.1692	109.385	358.26
DDX39A	Homo sapiens	ATP-dependent RNA helicase DDX39A	DX39A_HUMAN	398	TRUE	_ILNDVQDRFEVNVAELPEEIDISTYIEQSR_		5.10475	58.9249	101.649	302.734
DDX39A	Homo sapiens	ATP-dependent RNA helicase DDX39A	DX39A_HUMAN	406	TRUE	_FEVNVAELPEEIDISTYIEQSR_		63.3626	66.3394	86.7306	148.577
DDX39A	Homo sapiens	ATP-dependent RNA helicase DDX39A	DX39A_HUMAN	276	TRUE	_KLFDLLDVLEFNQVIIFVK_		30.6108	11.0802	25.4356	57.222
MYO1C	Homo sapiens	Unconventional myosin-Ic	MYO1C_HUMAN	959	TRUE	_IDYANLTGISVSSLSDSLFVLHVQR_	18187.8	15711.8	15222.7	12190.8	9960.62
MYO1C	Homo sapiens	Unconventional myosin-Ic	MYO1C_HUMAN	544	TRUE	_LLHYAGEVTYSVTGFLDKNNDLLFR_	21853.8	18371.5	11568.9	9812.24	7234.98
MYO1C	Homo sapiens	Unconventional myosin-Ic	MYO1C_HUMAN	260	TRUE	_NPQSYLYLVK_	71.1059	13754.6	9349.29	15538.6	9580.12
MYO1C	Homo sapiens	Unconventional myosin-Ic	MYO1C_HUMAN	44	TRUE	_DRVGVQDFVLLENFTSEAAFIENLR_	13806.8	11955.2	11569	5889.75	4810.59
MYO1C	Homo sapiens	Unconventional myosin-Ic	MYO1C_HUMAN	46	TRUE	_VGVQDFVLLENFTSEAAFIENLR_	16889.8	12744.8	7362.1	5502.76	3460.23
MYO1C	Homo sapiens	Unconventional myosin-Ic	MYO1C_HUMAN	362	TRUE	_GEELLSPLNLEQAAYAR_	201.225	11514.1	7221.46	10927.2	9502.71
MYO1C	Homo sapiens	Unconventional myosin-Ic	MYO1C_HUMAN	92	TRUE	_DLQIYSR_	11.2555	7893.04	6826.39	11273.4	7118.48
MYO1C	Homo sapiens	Unconventional myosin-Ic	MYO1C_HUMAN	153	TRUE	_LLQFYAETC[Carbamidomethyl (C)]PAPER_	114.406	6684.44	6594.8	10149.3	7334.99
MYO1C	Homo sapiens	Unconventional myosin-Ic	MYO1C_HUMAN	886	TRUE	_DNYPQSVPR_	7.96067	8109.31	5194.86	9552.2	6238.09
MYO1C	Homo sapiens	Unconventional myosin-Ic	MYO1C_HUMAN	106	TRUE	_GVSFYEVPPHLFAVADTVYR_	356.995	5335.52	4725.44	9699.77	6844.71
MYO1C	Homo sapiens	Unconventional myosin-Ic	MYO1C_HUMAN	760	TRUE	_SAIC[Carbamidomethyl (C)]IQSWWR_	548.816	5023.23	3785.52	6133.97	4742.77
MYO1C	Homo sapiens	Unconventional myosin-Ic	MYO1C_HUMAN	988	TRUE	_QKGDVVLQSDHVIETLTK_	158.533	5171.58	3824.32	6095.45	4327.96
MYO1C	Homo sapiens	Unconventional myosin-Ic	MYO1C_HUMAN	133	TRUE	_DQAVMISGESGAGKTEATKR_	323.345	3357.06	3298.63	5359.55	2435.96
MYO1C	Homo sapiens	Unconventional myosin-Ic	MYO1C_HUMAN	133	TRUE	_DQAVM[Oxidation (M)]ISGESGAGKTEATKR_	323.345	3357.06	3298.63	5359.55	2435.96
MYO1C	Homo sapiens	Unconventional myosin-Ic	MYO1C_HUMAN	133	TRUE	_DQAVMISGESGAGK_	172.204	2520.1	1481.41	3230.94	2302.54
MYO1C	Homo sapiens	Unconventional myosin-Ic	MYO1C_HUMAN	44	TRUE	_DRVGVQDFVLLENFTSEAAFIENLRR_	3583.64	2279.4	1437.61	967.294	746.25
MYO1C	Homo sapiens	Unconventional myosin-Ic	MYO1C_HUMAN	489	TRUE	_GIISILDEEC[Carbamidomethyl (C)]LRPGEATDLTFLEK_	747.363	2166.25	1592.76	2451.8	2037.16
MYO1C	Homo sapiens	Unconventional myosin-Ic	MYO1C_HUMAN	358	TRUE	_IIAKGEELLSPLNLEQAAYAR_	165.916	2445.36	1942.32	2136.87	1209.25
MYO1C	Homo sapiens	Unconventional myosin-Ic	MYO1C_HUMAN	46	TRUE	_VGVQDFVLLENFTSEAAFIENLRR_	4500.9	765.316	1051.22	721.826	426.366
MYO1C	Homo sapiens	Unconventional myosin-Ic	MYO1C_HUMAN	957	TRUE	_QRIDYANLTGISVSSLSDSLFVLHVQR_	2004.23	1829.65	1243.67	1262.93	831.118
MYO1C	Homo sapiens	Unconventional myosin-Ic	MYO1C_HUMAN	456	TRUE	_SEQEEYEAEGIAWEPVQYFNNK_	174.025	2195.55	1023.41	2109.12	1463.73
MYO1C	Homo sapiens	Unconventional myosin-Ic	MYO1C_HUMAN	544	TRUE	_LLHYAGEVTYSVTGFLDK_	2098.73	1380.45	925.007	800.868	790.475
MYO1C	Homo sapiens	Unconventional myosin-Ic	MYO1C_HUMAN	71	TRUE	_FRENLIYTYIGPVLVSVNPYR_	178.547	559.204	504.828	1056.43	1300.83
MYO1C	Homo sapiens	Unconventional myosin-Ic	MYO1C_HUMAN	413	TRUE	_STTVLGLLDIYGFEVFQHNSFEQFC[Carbamidomethyl (C)]INYC[Carbamidomethyl (C)]NEK_	897.937	580.632	493.242	464.803	308.004
MYO1C	Homo sapiens	Unconventional myosin-Ic	MYO1C_HUMAN	73	TRUE	_ENLIYTYIGPVLVSVNPYR_	22.2376	293.358	423.282	423.172	393.158
MYO1C	Homo sapiens	Unconventional myosin-Ic	MYO1C_HUMAN	133	TRUE	_DQAVMISGESGAGKTEATK_	99.339	373.554	211.929	458.146	362.454
MYO1C	Homo sapiens	Unconventional myosin-Ic	MYO1C_HUMAN	487	TRUE	_FKGIISILDEEC[Carbamidomethyl (C)]LRPGEATDLTFLEK_	179.912	95.336	121.141	108.525	96.0433
MYO1C	Homo sapiens	Unconventional myosin-Ic	MYO1C_HUMAN	104	TRUE	_YRGVSFYEVPPHLFAVADTVYR_	26.7576	112.756	70.7302	102.914
MYO1C	Homo sapiens	Unconventional myosin-Ic	MYO1C_HUMAN	814	TRUE	_TSFLLNLR_		32860.6	24745.2	40231.8	25751.1
MYO1C	Homo sapiens	Unconventional myosin-Ic	MYO1C_HUMAN	341	TRUE	_LLSVEGSTLR_		28236.1	24210.9	39032.6	28706.5
MYO1C	Homo sapiens	Unconventional myosin-Ic	MYO1C_HUMAN	648	TRUE	_YLGLLENLR_		20314.6	23886	36324.9	25948.3
[truncated: 100,561 more rows]

## Sheet: Table 3 Proteins
PG.Genes	PG.Organisms	PG.ProteinDescriptions	PG.ProteinNames	PG.NrOfModifiedSequencesIdentified (Experiment-wide)	[1] ADHQC_SPD30_OA10034_10492_061824.htrms.PG.NrOfPrecursorsIdentified	[2] ID114158_01_SPD30_OA10034_10492_061824.htrms.PG.NrOfPrecursorsIdentified	[3] ID114159_01_SPD30_OA10034_10492_061824.htrms.PG.NrOfPrecursorsIdentified	[4] ID114160_01_SPD30_OA10034_10492_061824.htrms.PG.NrOfPrecursorsIdentified	[5] ID114161_01_SPD30_OA10034_10492_061824.htrms.PG.NrOfPrecursorsIdentified	[1] ADHQC_SPD30_OA10034_10492_061824.htrms.PG.Quantity	[2] ID114158_01_SPD30_OA10034_10492_061824.htrms.PG.Quantity	[3] ID114159_01_SPD30_OA10034_10492_061824.htrms.PG.Quantity	[4] ID114160_01_SPD30_OA10034_10492_061824.htrms.PG.Quantity	[5] ID114161_01_SPD30_OA10034_10492_061824.htrms.PG.Quantity
IGKV2-28;IGKV2-40;IGKV2D-40;IGKV2D-28	Homo sapiens	Immunoglobulin kappa variable 2-28;Immunoglobulin kappa variable 2-40;Immunoglobulin kappa variable 2D-40;Immunoglobulin kappa variable 2D-28	KV228_HUMAN;KV240_HUMAN;KVD40_HUMAN;KVD28_HUMAN	2	0	2	2	2	1		506.327	412.491	404.454	90.2488
ZNF892	Homo sapiens	Zinc finger protein 892	ZN892_HUMAN	2	0	2	2	2	2		22.4027	62.6917	34.1071	45.9795
IGKV3D-11;IGKV3-11	Homo sapiens	Immunoglobulin kappa variable 3D-11;Immunoglobulin kappa variable 3-11	KVD11_HUMAN;KV311_HUMAN	1	0	1	1	0	0		1400.94	459.255
IGHV3-74;IGHV3-66;IGHV3-23;IGHV3-53;IGHV3-30;IGHV3-33;IGHV3-30-3;IGHV3-30-5	Homo sapiens	Immunoglobulin heavy variable 3-74;Immunoglobulin heavy variable 3-66;Immunoglobulin heavy variable 3-23;Immunoglobulin heavy variable 3-53;Immunoglobulin heavy variable 3-30;Immunoglobulin heavy variable 3-33;Immunoglobulin heavy variable 3-30-3;Immunoglobulin heavy variable 3-30-5	HV374_HUMAN;HV366_HUMAN;HV323_HUMAN;HV353_HUMAN;HV330_HUMAN;HV333_HUMAN;HVC33_HUMAN;HVC05_HUMAN	1	0	1	0	0	0		399.257
ZC3H11B	Homo sapiens	Zinc finger CCCH domain-containing protein 11B	ZC11B_HUMAN	1	0	0	1	0	1			44.2999		103.528
MSANTD7	Homo sapiens	Myb/SANT-like DNA-binding domain-containing protein 7	MSD7_HUMAN	2	0	2	2	2	1		364.05	393.412	828.847	158.283
RBM47	Homo sapiens	RNA-binding protein 47	RBM47_HUMAN	56	1	71	85	83	62	14.749	194682	1.33129e+06	888539	142977
ESYT2	Homo sapiens	Extended synaptotagmin-2	ESYT2_HUMAN	47	0	57	56	57	55		91112.2	68387.2	116612	81286.1
MED19	Homo sapiens	Mediator of RNA polymerase II transcription subunit 19	MED19_HUMAN	11	0	12	11	11	10		6209.25	4760.29	9137.86	5092.42
SHTN1	Homo sapiens	Shootin-1	SHOT1_HUMAN	3	2	4	3	3	1	1483.48	1044.23	592.096	552.85	210.22
TMEM120B	Homo sapiens	Transmembrane protein 120B	T120B_HUMAN	2	0	1	2	2	2		162.583	382.876	290.328	250.805
ARHGAP10	Homo sapiens	Rho GTPase-activating protein 10	RHG10_HUMAN	21	0	20	20	22	18		7823.21	2746.02	8428.75	4576.97
MEX3A	Homo sapiens	RNA-binding protein MEX3A	MEX3A_HUMAN	23	0	17	27	26	15		5593.67	34191.3	20334.4	2778.7
ILVBL	Homo sapiens	2-hydroxyacyl-CoA lyase 2	HACL2_HUMAN	10	0	7	8	8	8		783.709	1170.36	1532.15	1604.34
PLEKHG3	Homo sapiens	Pleckstrin homology domain-containing family G member 3	PKHG3_HUMAN	31	0	33	31	35	34		14273.1	11579.9	26669.3	18186.1
ELOVL7	Homo sapiens	Elongation of very long chain fatty acids protein 7	ELOV7_HUMAN	4	0	5	5	5	5		8655.56	8010.01	12122.4	7752.98
BCLAF3	Homo sapiens	BCLAF1 and THRAP3 family member 3	BCLA3_HUMAN	6	0	5	5	5	6		714.809	421.623	840.269	1876.85
ZNF320	Homo sapiens	Zinc finger protein 320	ZN320_HUMAN	9	0	8	7	9	9		4219.78	2654.92	5577.97	5823.69
NBAS	Homo sapiens	NBAS subunit of NRZ tethering complex	NBAS_HUMAN	15	0	12	13	14	10		1097.06	1564.17	2111.13	1340.41
TARS3	Homo sapiens	Threonine--tRNA ligase 2, cytoplasmic	SYTC2_HUMAN	7	0	7	7	6	4		1350.23	760.151	1466.79	599.904
TYW5	Homo sapiens	tRNA wybutosine-synthesizing protein 5	TYW5_HUMAN	1	0	1	0	0	0		53.4356
VWA8	Homo sapiens	von Willebrand factor A domain-containing protein 8	VWA8_HUMAN	48	0	45	47	48	46		19034.2	14355.4	21319.2	14589.1
SBNO1	Homo sapiens	Protein strawberry notch homolog 1	SBNO1_HUMAN	27	0	27	22	26	22		6307.93	3656.81	10906.1	4337.32
GTPBP10	Homo sapiens	GTP-binding protein 10	GTPBA_HUMAN	31	0	35	34	35	34		42623.6	30846.6	58610.9	30671.9
RAB19	Homo sapiens	Ras-related protein Rab-19	RAB19_HUMAN	1	0	1	1	1	1		475.38	302.349	334.861	341.173
DENND11	Homo sapiens	DENN domain-containing protein 11	DEN11_HUMAN	1	0	1	1	1	1		230.022	79.5523	141.006	193.103
POTEF	Homo sapiens	POTE ankyrin domain family member F	POTEF_HUMAN	2	2	2	2	2	2	1345.34	9664.02	2707.09	1168.1	560.139
VPS37C	Homo sapiens	Vacuolar protein sorting-associated protein 37C	VP37C_HUMAN	2	0	2	2	2	2		760.015	371.989	1132.82	839.935
TRAPPC13	Homo sapiens	Trafficking protein particle complex subunit 13	TPC13_HUMAN	1	0	0	0	1	1				1590.08	152.296
CNOT1	Homo sapiens	CCR4-NOT transcription complex subunit 1	CNOT1_HUMAN	69	2	69	67	70	67	51.4646	27021.3	23937.4	37077.8	24074.7
BDP1	Homo sapiens	Transcription factor TFIIIB component B'' homolog	BDP1_HUMAN	13	0	10	6	13	7		2398.76	1271.71	3892.19	1090.45
SOWAHB	Homo sapiens	Ankyrin repeat domain-containing protein SOWAHB	SWAHB_HUMAN	1	0	1	0	1	1		90.7902		141.797	97.2278
ZNF316	Homo sapiens	Zinc finger protein 316	ZN316_HUMAN	6	0	6	6	6	6		1129.84	908.374	2071.2	1009.08
EPOP	Homo sapiens	Elongin BC and Polycomb repressive complex 2-associated protein	EPOP_HUMAN	4	0	4	3	4	2		1494.3	566.877	2651.59	402.234
SMCHD1	Homo sapiens	Structural maintenance of chromosomes flexible hinge domain-containing protein 1	SMHD1_HUMAN	144	2	184	172	180	179	186.787	541344	433389	695617	581072
ARHGAP42	Homo sapiens	Rho GTPase-activating protein 42	RHG42_HUMAN	3	2	3	2	3	2	71.4686	2041.07	2263.85	3036.63	156.109
METTL15	Homo sapiens	12S rRNA N4-methylcytidine (m4C) methyltransferase	MET15_HUMAN	9	0	8	9	9	7		2047.86	1483.07	3203.66	2454.59
CCDC85C	Homo sapiens	Coiled-coil domain-containing protein 85C	CC85C_HUMAN	9	0	9	8	9	6		1629.16	1224.98	1698.55	1403.74
ARHGAP32	Homo sapiens	Rho GTPase-activating protein 32	RHG32_HUMAN	8	0	5	7	7	6		713.795	706.328	1111.37	841.776
POM121C	Homo sapiens	Nuclear envelope pore membrane protein POM 121C	P121C_HUMAN	32	0	36	34	36	35		47476.4	38956.1	70105	48838.4
A2ML1	Homo sapiens	Alpha-2-macroglobulin-like protein 1	A2ML1_HUMAN	20	0	18	20	17	17		8521.17	14360.2	5547.62	5709.4
EFCAB7	Homo sapiens	EF-hand calcium-binding domain-containing protein 7	EFCB7_HUMAN	2	0	2	2	2	2		2828.46	1494.68	1187.56	1062.53
DDX11L8	Homo sapiens	Putative ATP-dependent RNA helicase DDX11-like protein 8	D11L8_HUMAN	2	0	2	2	2	2		567.23	256.512	676.602	414.862
CEBPZOS	Homo sapiens	Protein CEBPZOS	CEBOS_HUMAN	1	0	1	1	1	1		600.613	270.91	568.202	260.181
ZNF724	Homo sapiens	Zinc finger protein 724	ZN724_HUMAN	6	0	7	8	8	7		1112.54	1020.01	1955.15	1037.82
PHF20L1	Homo sapiens	PHD finger protein 20-like protein 1	P20L1_HUMAN	12	0	11	9	11	10		4962.42	4486.63	7969.42	3375.06
SNRPGP15;SNRPG	Homo sapiens	Putative small nuclear ribonucleoprotein G-like protein 15;Small nuclear ribonucleoprotein G	RUXGL_HUMAN;RUXG_HUMAN	6	0	9	9	9	9		210330	118980	167489	313265
NUDT19	Homo sapiens	Acyl-coenzyme A diphosphatase NUDT19	NUD19_HUMAN	5	0	4	5	4	5		581.188	5665.07	9674.32	10060.6
COL6A5	Homo sapiens	Collagen alpha-5(VI) chain	CO6A5_HUMAN	1	0	1	1	1	1		21.7907	24.9341	46.4022	0.571057
ADH1	Saccharomyces cerevisiae (strain ATCC 204508 / S288c)	Alcohol dehydrogenase 1		54	87	82	82	81	79	8535625	13784756	13588894	13441904	12804109
ADH2	Saccharomyces cerevisiae (strain ATCC 204508 / S288c)	Alcohol dehydrogenase 2		9	13	12	12	13	12	174965	224307	232247	225304	203712
ALB	Bos taurus	Serum albumin		26	9	33	32	32	32	2292.67	15973.4	19347.1	22406.9	13798.6
ALB	Homo sapiens	Serum albumin;Albumin	;ALBU_HUMAN	52	43	62	64	54	56	22766.9	449954	163254	64480.9	40892.6
ZBTB42	Homo sapiens	Zinc finger and BTB domain-containing protein 42	ZBT42_HUMAN	12	0	13	11	11	12		5768.87	3089.9	4970.08	5447.38
ZNF814	Homo sapiens	Zinc finger protein 814	ZN814_HUMAN	1	0	0	0	1	1				352.359	348.55
GPR89A;GPR89B	Homo sapiens	Golgi pH regulator A;Golgi pH regulator B	GPHRA_HUMAN;GPHRB_HUMAN	10	0	12	12	12	12		6980.91	7177.65	10938.7	6201.18
WASH3P;WASH2P	Homo sapiens	Putative WAS protein family homolog 3;WAS protein family homolog 2	WASH3_HUMAN;WASH2_HUMAN	2	0	2	2	2	2		556.154	536.123	690.612	397.608
AJM1	Homo sapiens	Apical junction component 1 homolog	AJM1_HUMAN	1	0	1	1	1	1		150.938	94.8213	255.706	122.472
TRIM49D1	Homo sapiens	Tripartite motif-containing protein 49D	TR49D_HUMAN	9	0	8	8	8	8		1933.39	1606.87	2647.19	2204.77
TMEM238	Homo sapiens	Transmembrane protein 238	TM238_HUMAN	3	0	3	3	3	3		3719.97	3306.34	5559.73	2040.57
MCRIP1	Homo sapiens	Mapk-regulated corepressor-interacting protein 1	MCRI1_HUMAN	4	0	4	4	4	3		2209.25	1119.92	2165.24	768.551
CSN1S1	Bos taurus	Alpha-S1-casein		21	3	35	36	36	35	561.4	3.78604e+06	6234243	4.75997e+06	4628119
CSN1S2	Bos taurus	Alpha-S2-casein		31	1	41	41	42	40	228.34	2.36064e+06	2.9601e+06	2.64505e+06	2.20816e+06
CSN2	Bos taurus	Beta-casein		10	0	13	13	13	13		595253	755695	667646	548999
ZNF587B	Homo sapiens	Zinc finger protein 587B	Z587B_HUMAN	4	0	1	2	4	4		484.77	193.687	721.817	941.932
NACA	Homo sapiens	Nascent polypeptide-associated complex subunit alpha, muscle-specific form	NACAM_HUMAN	8	1	9	10	11	6	36.0315	4236.29	3697.65	46181.9	2309.4
C11orf98	Homo sapiens	Uncharacterized protein C11orf98	CK098_HUMAN	13	0	17	16	17	16		62761.6	23697	74511.1	38435.6
CNK3/IPCEF1;CNKSR3	Homo sapiens	CNK3/IPCEF1 fusion protein;Connector enhancer of kinase suppressor of ras 3	CNIPF_HUMAN;CNKR3_HUMAN	3	0	2	2	3	3		402.392	255.443	731.906	448.072
KRT10	Homo sapiens	Keratin, type I cytoskeletal 10;Keratin, type I cytoskeletal 10	;K1C10_HUMAN	60	32	85	91	91	87	15160.2	2.35351e+06	5441093	3.3049e+06	2.27797e+06
KRT14	Homo sapiens	Keratin, type I cytoskeletal 14;Keratin, type I cytoskeletal 14	;K1C14_HUMAN	84	13	115	120	118	109	1578.31	1.13699e+06	3.2336e+06	3536511	1.33625e+06
KRT15	Homo sapiens	Keratin, type I cytoskeletal 15;Keratin, type I cytoskeletal 15	;K1C15_HUMAN	2	0	1	2	0	2		90.5925	301.104		186.592
KRT16	Homo sapiens	Keratin, type I cytoskeletal 16;Keratin, type I cytoskeletal 16	;K1C16_HUMAN	44	5	45	60	59	59	120.475	96282	491540	638697	228281
KRT17	Homo sapiens	Keratin, type I cytoskeletal 17;Keratin, type I cytoskeletal 17	;K1C17_HUMAN	31	3	35	39	39	38	131.76	23732.8	109125	107455	55728.5
KRT18	Homo sapiens	Keratin, type I cytoskeletal 18;Keratin, type I cytoskeletal 18	;K1C18_HUMAN	66	5	91	90	92	90	106.303	1.02007e+06	1.01748e+06	1.54523e+06	1.31582e+06
KRT23	Homo sapiens	Keratin, type I cytoskeletal 23;Keratin, type I cytoskeletal 23	;K1C23_HUMAN	21	0	23	25	24	22		6283.56	16192.9	11833.4	6022.72
KRT9	Homo sapiens	Keratin, type I cytoskeletal 9;Keratin, type I cytoskeletal 9	;K1C9_HUMAN	94	19	115	128	125	114	6107.64	2.22559e+06	8037665	7937966	1.85556e+06
KRT2	Homo sapiens	Keratin, type II cytoskeletal 2 epidermal;Keratin, type II cytoskeletal 2 epidermal	;K22E_HUMAN	85	21	123	126	127	118	6645.56	1.87613e+06	5826561	3.86024e+06	2.11926e+06
KRT76	Homo sapiens	Keratin, type II cytoskeletal 2 oral;Keratin, type II cytoskeletal 2 oral	;K22O_HUMAN	10	0	3	10	3	3		1928.42	30770	12007.6	4034.98
KRT1	Homo sapiens	Keratin, type II cytoskeletal 1;Keratin, type II cytoskeletal 1	;K2C1_HUMAN	97	26	141	148	146	137	8851.63	4.14838e+06	13453971	11658540	3.75965e+06
KRT77	Homo sapiens	Keratin, type II cytoskeletal 1b;Keratin, type II cytoskeletal 1b	;K2C1B_HUMAN	34	0	37	34	33	32		74714.6	33498.7	28556.6	27281.1
KRT4	Homo sapiens	Keratin, type II cytoskeletal 4;Keratin, type II cytoskeletal 4	;K2C4_HUMAN	59	1	18	75	18	19	7.3567	8765.4	306782	33130.8	16801.5
KRT5	Homo sapiens	Keratin, type II cytoskeletal 5;Keratin, type II cytoskeletal 5	;K2C5_HUMAN	55	4	60	66	65	59	57.0835	250639	813284	742978	256893
KRT6A	Homo sapiens	Keratin, type II cytoskeletal 6A;Keratin, type II cytoskeletal 6A	;K2C6A_HUMAN	75	8	94	106	106	98	619.987	941436	3.47257e+06	2.67384e+06	1.29854e+06
KRT6B	Homo sapiens	Keratin, type II cytoskeletal 6B;Keratin, type II cytoskeletal 6B	;K2C6B_HUMAN	14	1	15	16	16	15	183.572	301100	994817	1.1323e+06	356071
KRT71	Homo sapiens	Keratin, type II cytoskeletal 71;Keratin, type II cytoskeletal 71	;K2C71_HUMAN	2	0	2	2	1	2		2001.24	7082.79	7420.13	2674.31
KRT78	Homo sapiens	Keratin, type II cytoskeletal 78;Keratin, type II cytoskeletal 78	;K2C78_HUMAN	34	0	37	42	39	33		27883.5	79247.9	48831.4	22012.2
KRT80	Homo sapiens	Keratin, type II cytoskeletal 80;Keratin, type II cytoskeletal 80	;K2C80_HUMAN	38	0	32	40	39	32		11505.3	33624.7	28600.6	9971.04
MIEF1	Homo sapiens	Mitochondrial ribosome and complex I assembly factor AltMIEF1	MIDUO_HUMAN	3	0	3	3	3	3		1278.55	928.898	1967.06	1286.52
KIF2A	Homo sapiens	Kinesin-like protein KIF2A	KIF2A_HUMAN	37	0	39	41	41	36		82542.7	45855.9	131639	50172.4
TK2	Homo sapiens	Thymidine kinase 2, mitochondrial	KITM_HUMAN	3	0	3	3	3	3		836.858	635.866	1114.87	657.619
DDX39A	Homo sapiens	ATP-dependent RNA helicase DDX39A	DX39A_HUMAN	26	0	31	30	30	32		35067.4	34876.7	41995.9	69415.5
MYO1C	Homo sapiens	Unconventional myosin-Ic	MYO1C_HUMAN	92	44	116	116	118	112	88186.6	480246	399601	576703	409829
MYO1F	Homo sapiens	Unconventional myosin-If	MYO1F_HUMAN	5	2	6	6	5	5	287.502	533.267	691.444	945.811	597.043
SNAP23	Homo sapiens	Synaptosomal-associated protein 23	SNP23_HUMAN	12	0	14	11	13	14		4875.29	4186.96	8058.12	6839.91
HAX1	Homo sapiens	HCLS1-associated protein X-1	HAX1_HUMAN	16	0	19	21	21	20		32257.9	26937.9	43289.4	36838.1
GTPBP1	Homo sapiens	GTP-binding protein 1	GTPB1_HUMAN	34	0	39	36	39	29		38981.2	15382.4	50079	9419.45
STXBP3	Homo sapiens	Syntaxin-binding protein 3	STXB3_HUMAN	4	0	4	4	4	4		491.742	492.012	915.412	758.341
ARVCF	Homo sapiens	Splicing regulator ARVCF	ARVC_HUMAN	26	0	28	26	27	26		20477.1	15765.8	26391.9	21726.8
RAB27B	Homo sapiens	Ras-related protein Rab-27B	RB27B_HUMAN	1	0	1	1	1	0		793.292	1170.14	2026.85
AP3B1	Homo sapiens	AP-3 complex subunit beta-1	AP3B1_HUMAN	33	3	31	31	33	32	159.464	9115.39	6720.88	12175.1	9571.61
NDUFS8	Homo sapiens	NADH dehydrogenase [ubiquinone] iron-sulfur protein 8, mitochondrial	NDUS8_HUMAN	9	0	9	9	9	9		7552.86	6690.11	12321.8	8519.79
PSMD11	Homo sapiens	26S proteasome non-ATPase regulatory subunit 11	PSD11_HUMAN	11	5	9	10	8	10	777.918	1696.37	1314.44	1643.82	1268.39
PSMD12	Homo sapiens	26S proteasome non-ATPase regulatory subunit 12	PSD12_HUMAN	14	9	10	8	9	6	2699.29	2215.61	1002.65	1783.82	1193.28
MEN1	Homo sapiens	Menin	MEN1_HUMAN	16	0	16	15	16	16		9295.83	5747.84	13570.8	8153.09
CBX4	Homo sapiens	E3 SUMO-protein ligase CBX4	CBX4_HUMAN	32	0	37	36	38	36		65142.2	49171.6	94918.1	55962.5
GET1	Homo sapiens	Guided entry of tail-anchored proteins factor 1	GET1_HUMAN	3	0	3	3	2	3		1029.27	912.637	905.69	1214.72
PGRMC1	Homo sapiens	Membrane-associated progesterone receptor component 1	PGRC1_HUMAN	8	0	8	8	7	8		6638.1	5169.83	7943.62	5430.69
SUPT5H	Homo sapiens	Transcription elongation factor SPT5	SPT5H_HUMAN	24	2	25	22	25	18	83.5365	9494.35	5378.8	12658.8	2861
TAF4	Homo sapiens	Transcription initiation factor TFIID subunit 4	TAF4_HUMAN	20	2	20	19	20	19	55.1527	9125.24	6965.61	13464.6	11441.6
RFXAP	Homo sapiens	Regulatory factor X-associated protein	RFXAP_HUMAN	4	0	4	4	4	4		2416.14	2002.17	2903.42	669.253
HIP1	Homo sapiens	Huntingtin-interacting protein 1	HIP1_HUMAN	1	0	1	0	1	1		37.1088		74.8651	75.2797
CLIC1	Homo sapiens	Chloride intracellular channel protein 1	CLIC1_HUMAN	4	0	4	4	4	3		1095.67	1912.7	901.746	566.927
EIF3F	Homo sapiens	Eukaryotic translation initiation factor 3 subunit F	EIF3F_HUMAN	17	2	18	18	18	18	516.243	10188.7	7178.56	14726.7	12337
WWP2	Homo sapiens	NEDD4-like E3 ubiquitin-protein ligase WWP2	WWP2_HUMAN	20	0	18	16	22	18		3547.3	4062.73	14171.5	3851.26
CDC7	Homo sapiens	Cell division cycle 7-related protein kinase	CDC7_HUMAN	11	0	11	11	12	10		3992.48	1562.19	4244.52	1899.62
BMAL1	Homo sapiens	Basic helix-loop-helix ARNT-like protein 1	BMAL1_HUMAN	1	0	0	1	1	0			26.9587	95.3577
PIK3CD	Homo sapiens	Phosphatidylinositol 4,5-bisphosphate 3-kinase catalytic subunit delta isoform	PK3CD_HUMAN	20	1	19	19	19	20	2.16665	5135.57	7473.28	6648.22	5942.54
PDHX	Homo sapiens	Pyruvate dehydrogenase protein X component, mitochondrial	ODPX_HUMAN	7	0	5	6	5	5		1532.73	890.245	1476.68	1486.76
QSOX1	Homo sapiens	Sulfhydryl oxidase 1	QSOX1_HUMAN	30	0	33	30	33	29		22372.3	16958.8	28623.1	18701.4
SLC33A1	Homo sapiens	Acetyl-coenzyme A transporter 1	ACATN_HUMAN	5	0	5	5	5	3		1632.21	1020.9	1815.35	772.54
WASL	Homo sapiens	Actin nucleation-promoting factor WASL	WASL_HUMAN	13	0	12	13	13	11		6254.88	3724.56	8288.15	2101.3
IPO5	Homo sapiens	Importin-5	IPO5_HUMAN	30	3	33	32	33	32	180.714	12695.9	9197.69	17080.7	11283.1
POLRMT	Homo sapiens	DNA-directed RNA polymerase, mitochondrial	RPOM_HUMAN	56	0	62	61	63	61		38449.2	28466	58378.3	36101.4
SAP18	Homo sapiens	Histone deacetylase complex subunit SAP18	SAP18_HUMAN	24	0	35	36	35	37		173634	299798	197698	1.12886e+06
IGF2BP3	Homo sapiens	Insulin-like growth factor 2 mRNA-binding protein 3	IF2B3_HUMAN	26	0	29	27	28	29		21625.3	14926.5	19575.5	30168.6
DNM1L	Homo sapiens	Dynamin-1-like protein	DNM1L_HUMAN	8	0	7	7	6	7		1760.81	1761.42	1911.18	1500.41
RTCA	Homo sapiens	RNA 3'-terminal phosphate cyclase	RTCA_HUMAN	48	1	69	69	68	66	17.1289	1.3807e+06	2.33509e+06	1.87837e+06	1.25378e+06
PIK3C2A	Homo sapiens	Phosphatidylinositol 4-phosphate 3-kinase C2 domain-containing subunit alpha	P3C2A_HUMAN	75	0	79	74	76	75		49964.6	37673.6	59543.7	50403.4
IFRD1	Homo sapiens	Interferon-related developmental regulator 1	IFRD1_HUMAN	2	0	2	2	2	2		354.78	259.814	418.952	403.33
PIK3R2	Homo sapiens	Phosphatidylinositol 3-kinase regulatory subunit beta	P85B_HUMAN	11	0	10	10	10	11		2400.88	1508.58	2646.9	2770.71
AGRN	Homo sapiens	Agrin	AGRIN_HUMAN	37	0	35	34	38	33		15130.3	8767.97	24638.5	9583.44
EXOC5	Homo sapiens	Exocyst complex component 5	EXOC5_HUMAN	18	1	18	16	17	18	19.2259	6181.37	4672.86	8202.42	5902
ELL2	Homo sapiens	RNA polymerase II elongation factor ELL2	ELL2_HUMAN	1	0	1	1	1	1		1249.36	323.064	1927.85	435.981
HMGN4	Homo sapiens	High mobility group nucleosome-binding domain-containing protein 4	HMGN4_HUMAN	2	0	3	3	3	3		1788.29	1221.09	1987.56	600.353
NDUFA4	Homo sapiens	Cytochrome c oxidase subunit NDUFA4	NDUA4_HUMAN	5	0	5	5	5	4		26683.7	22965.3	37527.9	33752.4
PSMD14	Homo sapiens	26S proteasome non-ATPase regulatory subunit 14	PSDE_HUMAN	6	4	4	4	3	2	334.585	621.596	391.901	417.953	294.581
ZNF593	Homo sapiens	Zinc finger protein 593	ZN593_HUMAN	14	0	17	17	17	17		194497	208946	250072	209202
KPNA3	Homo sapiens	Importin subunit alpha-4	IMA4_HUMAN	3	0	3	3	3	3		939.094	988.181	1882.26	1588.67
STK25	Homo sapiens	Serine/threonine-protein kinase 25	STK25_HUMAN	15	1	15	13	15	13	25.3857	7379.83	5263.43	8904.6	7187.65
USP9Y	Homo sapiens	Probable ubiquitin carboxyl-terminal hydrolase FAF-Y	USP9Y_HUMAN	34	1	31	32	34	30	32.7072	12334.9	8076.78	16199.8	8964.07
LAD1	Homo sapiens	Ladinin-1	LAD1_HUMAN	63	0	82	83	84	82		697590	548357	1.00762e+06	752015
FAAH	Homo sapiens	Fatty-acid amide hydrolase 1	FAAH1_HUMAN	14	0	15	14	15	14		6247.05	5249.37	6645.62	3950.06
KRIT1	Homo sapiens	Krev interaction trapped protein 1	KRIT1_HUMAN	4	0	4	4	4	3		373.475	340.467	699.489	240.305
PES1	Homo sapiens	Pescadillo homolog	PESC_HUMAN	35	0	36	36	37	35		40344.3	14832.2	74180.5	35648.1
SDCBP	Homo sapiens	Syntenin-1	SDCB1_HUMAN	12	0	13	13	13	11		6624.28	3867.8	6959.78	4419.15
MPHOSPH10	Homo sapiens	U3 small nucleolar ribonucleoprotein protein MPP10	MPP10_HUMAN	18	0	19	18	19	19		17032.5	10774.8	22984.3	16368.1
NOP56	Homo sapiens	Nucleolar protein 56	NOP56_HUMAN	60	2	79	78	81	80	205.437	239428	178360	318051	322139
DDX3X	Homo sapiens	ATP-dependent RNA helicase DDX3X	DDX3X_HUMAN	74	24	102	95	104	100	11726.4	740108	382493	1.14167e+06	755797
CCN1	Homo sapiens	CCN family member 1	CCN1_HUMAN	7	0	4	3	7	0		215.403	43.8999	2479.01
PEX12	Homo sapiens	Peroxisome assembly protein 12	PEX12_HUMAN	2	0	2	2	2	2		557.106	832.274	550.073	382.744
KPNA4	Homo sapiens	Importin subunit alpha-3	IMA3_HUMAN	7	2	7	7	7	5	157.395	2569.27	1689.29	3228.6	2192.07
NFIB	Homo sapiens	Nuclear factor 1 B-type	NFIB_HUMAN	18	0	24	23	24	21		28118.1	43460.9	25371.5	10472
E2F3	Homo sapiens	Transcription factor E2F3	E2F3_HUMAN	13	0	14	14	15	11		5124.85	4436.27	10083.4	1976.15
PPP6C	Homo sapiens	Serine/threonine-protein phosphatase 6 catalytic subunit	PPP6_HUMAN	7	1	6	6	6	5	78.0052	5230.44	3426.52	6271	4011.35
PIK3C2B	Homo sapiens	Phosphatidylinositol 4-phosphate 3-kinase C2 domain-containing subunit beta	P3C2B_HUMAN	3	0	2	3	2	3		182.558	364.661	639.271	384.2
ACACB	Homo sapiens	Acetyl-CoA carboxylase 2	ACACB_HUMAN	49	0	55	55	52	54		636048	730509	737704	758140
SCD	Homo sapiens	Stearoyl-CoA desaturase	SCD_HUMAN	6	0	5	6	5	5		3612.92	4129.93	4220.34	3612.39
CLDN4;CLDN3;CLDN9;CLDN6	Homo sapiens	Claudin-4;Claudin-3;Claudin-9;Claudin-6	CLD4_HUMAN;CLD3_HUMAN;CLD9_HUMAN;CLD6_HUMAN	1	0	2	2	2	2		1003.28	649.962	1066.06	631.737
PLPP1	Homo sapiens	Phospholipid phosphatase 1	PLPP1_HUMAN	3	0	2	2	3	2		686.505	540.208	1168.03	469.344
ARID1A	Homo sapiens	AT-rich interactive domain-containing protein 1A	ARI1A_HUMAN	74	2	80	83	85	84	124.252	79793.2	60230.5	125191	83679.2
C2CD2L	Homo sapiens	Phospholipid transfer protein C2CD2L	C2C2L_HUMAN	14	0	13	12	14	11		2864.07	4102.62	6338.1	1822.01
ARHGAP33	Homo sapiens	Rho GTPase-activating protein 33	RHG33_HUMAN	3	0	3	2	3	3		812.13	543.039	720.83	684.172
CIT	Homo sapiens	Citron Rho-interacting kinase	CTRO_HUMAN	37	0	37	28	35	34		12176.9	3873.64	16228.4	11189.5
COPE	Homo sapiens	Coatomer subunit epsilon	COPE_HUMAN	30	0	38	31	38	39		62325.4	34737.3	95140.8	212759
RFXANK	Homo sapiens	DNA-binding protein RFXANK	RFXK_HUMAN	1	0	1	1	1	1		64.4684	44.7617	152.565	62.6096
EIF1AY;EIF1AX	Homo sapiens	Eukaryotic translation initiation factor 1A, Y-chromosomal;Eukaryotic translation initiation factor 1A, X-chromosomal	IF1AY_HUMAN;IF1AX_HUMAN	4	3	3	3	2	3	221.131	461.436	263.019	606.006	654.078
AP3D1	Homo sapiens	AP-3 complex subunit delta-1	AP3D1_HUMAN	55	0	61	59	61	56		52359.3	30203.5	68282.8	50379.4
ZNF195	Homo sapiens	Zinc finger protein 195	ZN195_HUMAN	4	0	4	3	4	4		307.475	132.34	352.073	439.921
ABLIM1	Homo sapiens	Actin-binding LIM protein 1	ABLM1_HUMAN	9	1	4	7	7	7	32.5571	549.305	510.118	949.073	729.602
DVL1;DVL1P1	Homo sapiens	Segment polarity protein dishevelled homolog DVL-1;Putative segment polarity protein dishevelled homolog DVL1P1	DVL1_HUMAN;DVLP1_HUMAN	5	0	5	5	5	5		946.122	1444.19	1710.78	1120.68
CHD1	Homo sapiens	Chromodomain-helicase-DNA-binding protein 1	CHD1_HUMAN	18	0	16	16	17	18		4466.76	3138.02	8734.17	6929.06
CHD2	Homo sapiens	Chromodomain-helicase-DNA-binding protein 2	CHD2_HUMAN	25	0	24	23	23	23		9172.63	6538.06	15634.1	14412.9
GOSR2	Homo sapiens	Golgi SNAP receptor complex member 2	GOSR2_HUMAN	3	0	3	3	3	3		647.575	553.921	967.406	696.254
ADAM10	Homo sapiens	Disintegrin and metalloproteinase domain-containing protein 10	ADA10_HUMAN	13	0	13	11	12	11		3761.31	2039.16	5166.41	2157.24
EI24	Homo sapiens	Etoposide-induced protein 2.4 homolog	EI24_HUMAN	8	1	9	9	9	8	1.69734	14776.2	12188	17186.4	9910.49
TP53I11	Homo sapiens	Tumor protein p53-inducible protein 11	P5I11_HUMAN	4	0	5	5	5	5		2398.65	2132.87	3059.25	2142.27
KMT2D	Homo sapiens	Histone-lysine N-methyltransferase 2D	KMT2D_HUMAN	88	0	87	86	85	85		48604.3	42604	52701	37202.3
RIOK3	Homo sapiens	Serine/threonine-protein kinase RIO3	RIOK3_HUMAN	5	0	5	5	5	5		1441.4	1978.56	1884.13	2672.35
IMPA2	Homo sapiens	Inositol monophosphatase 2	IMPA2_HUMAN	2	0	2	2	1	1		642.443	947.992	558.545	275.629
MAP2K7	Homo sapiens	Dual specificity mitogen-activated protein kinase kinase 7	MP2K7_HUMAN	23	0	23	23	22	23		33857.7	21831.1	42544.5	20365.9
ACOT8	Homo sapiens	Acyl-coenzyme A thioesterase 8	ACOT8_HUMAN	7	0	8	7	7	8		4011.73	3379.66	4443.52	4057.8
CDIPT	Homo sapiens	CDP-diacylglycerol--inositol 3-phosphatidyltransferase	CDIPT_HUMAN	8	0	7	7	8	7		4672.13	3607.64	7110.48	4693.91
PRMT5	Homo sapiens	Protein arginine N-methyltransferase 5	ANM5_HUMAN	35	25	34	32	31	25	34969.6	60642.6	27718.7	32303.3	21505.3
NHERF1	Homo sapiens	Na(+)/H(+) exchange regulatory cofactor NHE-RF1	NHRF1_HUMAN	1	0	1	1	1	0		164.14	352.532	147.584
CHEK1	Homo sapiens	Serine/threonine-protein kinase Chk1	CHK1_HUMAN	19	0	19	18	20	17		12525.3	8154.19	14859.3	11861.7
TPP1	Homo sapiens	Tripeptidyl-peptidase 1	TPP1_HUMAN	5	0	5	5	4	5		3148.8	3329.19	3900.29	2104.52
TCERG1	Homo sapiens	Transcription elongation regulator 1	TCRG1_HUMAN	72	0	105	104	103	107		431243	292188	545939	779342
NDC80	Homo sapiens	Kinetochore protein NDC80 homolog	NDC80_HUMAN	13	0	13	10	11	11		2557.1	1392.67	2014.25	2219.27
NRP1	Homo sapiens	Neuropilin-1	NRP1_HUMAN	3	1	3	3	3	3	21.7023	493.439	364.143	843.485	535.914
TNPO2	Homo sapiens	Transportin-2	TNPO2_HUMAN	4	1	4	4	4	3	32.8928	1304.97	801.622	1858.11	985.441
UNC13B	Homo sapiens	Protein unc-13 homolog B	UN13B_HUMAN	11	1	10	9	11	10	22.2089	1020.93	1183.07	1471.72	1780.05
POLR3A	Homo sapiens	DNA-directed RNA polymerase III subunit RPC1	RPC1_HUMAN	52	0	54	47	51	32		22859.5	13140.7	23761.5	3099.92
PSMA7	Homo sapiens	Proteasome subunit alpha type-7	PSA7_HUMAN	12	2	10	12	12	11	137.99	5828.54	12228.8	8922.06	4691.55
SCAMP3	Homo sapiens	Secretory carrier-associated membrane protein 3	SCAM3_HUMAN	1	0	1	1	1	1		150.695	176.532	336.081	191.985
OPLAH	Homo sapiens	5-oxoprolinase	OPLA_HUMAN	26	18	29	26	27	16	21397.1	34356.3	19373.5	18049	10281.9
SLC30A4	Homo sapiens	Probable proton-coupled zinc antiporter SLC30A4	ZNT4_HUMAN	3	0	3	3	3	3		4145.87	7168.75	7095.29	2552.56
BCKDK	Homo sapiens	[3-methyl-2-oxobutanoate dehydrogenase [lipoamide]] kinase, mitochondrial	BCKD_HUMAN	32	0	42	41	43	41		209770	188401	362795	332839
MGST3	Homo sapiens	Glutathione S-transferase 3, mitochondrial	MGST3_HUMAN	9	1	9	10	9	8	16.4614	20647	29756.2	26182.8	19143.9
GEMIN2	Homo sapiens	Gem-associated protein 2	GEMI2_HUMAN	6	0	6	5	5	6		2566.75	1225.8	1756.93	2249.83
GIPC1	Homo sapiens	PDZ domain-containing protein GIPC1	GIPC1_HUMAN	1	0	1	1	1	1		112.254	134.629	131.861	28.3743
TIMM23	Homo sapiens	Mitochondrial import inner membrane translocase subunit Tim23	TIM23_HUMAN	14	0	17	17	17	16		57004.7	53471.9	60971.5	58616.4
CASK	Homo sapiens	Peripheral plasma membrane protein CASK	CSKP_HUMAN	11	0	10	7	9	10		1678.79	939.283	1959.02	1469.56
PLD2	Homo sapiens	Phospholipase D2	PLD2_HUMAN	27	0	26	25	25	25		6436.65	5721.71	9061.2	6535.98
UQCRQ	Homo sapiens	Cytochrome b-c1 complex subunit 8	QCR8_HUMAN	2	0	2	2	2	2		2973.58	2222.84	2889.99	2117.02
MYL12B;MYL12A	Homo sapiens	Myosin regulatory light chain 12B;Myosin regulatory light chain 12A	ML12B_HUMAN;ML12A_HUMAN	23	12	30	31	32	32	30580.7	896384	716548	1297154	1.12315e+06
AURKA	Homo sapiens	Aurora kinase A	AURKA_HUMAN	16	0	19	19	19	19		12764.2	10670.5	18892.6	9623.96
RAB29	Homo sapiens	Ras-related protein Rab-7L1	RAB7L_HUMAN	11	0	11	11	10	12		8317.99	8027.02	11230.1	9097.47
VPS26C	Homo sapiens	Vacuolar protein sorting-associated protein 26C	VP26C_HUMAN	10	0	10	10	10	9		5104.4	3923.52	5745.04	4748.78
PPP1R12A	Homo sapiens	Protein phosphatase 1 regulatory subunit 12A	MYPT1_HUMAN	59	1	64	63	69	67	86.3118	94614.4	75735.5	155010	133210
SLC27A2	Homo sapiens	Long-chain fatty acid transport protein 2	S27A2_HUMAN	15	0	14	16	14	13		4219.23	7281.03	5042.77	4003.2
GAK	Homo sapiens	Cyclin-G-associated kinase	GAK_HUMAN	28	0	24	26	27	24		7654.35	6745.28	11050.7	6258.55
ZNF263	Homo sapiens	Zinc finger protein 263	ZN263_HUMAN	2	0	2	2	2	1		97.4825	126.882	260.769	65.8206
HNRNPDL	Homo sapiens	Heterogeneous nuclear ribonucleoprotein D-like	HNRDL_HUMAN	32	1	44	45	45	44	127.988	193605	803141	541210	375595
XPO1	Homo sapiens	Exportin-1	XPO1_HUMAN	64	3	70	71	72	75	122.861	87932.8	71533.4	111482	81473.5
BTAF1	Homo sapiens	TATA-binding protein-associated factor 172	BTAF1_HUMAN	55	0	57	54	55	52		29616.5	21697.7	36695.9	23038.1
ARHGEF10	Homo sapiens	Rho guanine nucleotide exchange factor 10	ARHGA_HUMAN	2	3	2	2	1	2	449.502	293.356	131.189	99.1958	92.8949
ZNF609	Homo sapiens	Zinc finger protein 609	ZN609_HUMAN	26	0	25	26	24	24		14985.4	10756.8	18301.2	11856.3
ZNF646	Homo sapiens	Zinc finger protein 646	ZN646_HUMAN	7	0	6	3	7	3		1377.37	477.278	1987.4	392.742
SPTBN2	Homo sapiens	Spectrin beta chain, non-erythrocytic 2	SPTN2_HUMAN	115	3	127	123	126	122	211.248	89829.4	90687.6	123707	91826
MAST4	Homo sapiens	Microtubule-associated serine/threonine-protein kinase 4	MAST4_HUMAN	3	0	3	2	3	3		431.517	149.119	590.877	218.982
SEC16A	Homo sapiens	Protein transport protein Sec16A	SC16A_HUMAN	59	0	64	63	62	65		49077.3	41329.2	65717.3	69387.5
PLXNB2	Homo sapiens	Plexin-B2	PLXB2_HUMAN	23	0	19	21	22	18		5176.05	4451.77	6841.47	6064.69
AREL1	Homo sapiens	Apoptosis-resistant E3 ubiquitin protein ligase 1	AREL1_HUMAN	2	0	1	1	2	2		227.192	138.225	233.136	193.53
U2SURP	Homo sapiens	U2 snRNP-associated SURP motif-containing protein	SR140_HUMAN	116	3	173	169	170	168	201.82	5525963	2.79439e+06	3.52627e+06	5204147
SETD1A	Homo sapiens	Histone-lysine N-methyltransferase SETD1A	SET1A_HUMAN	25	0	26	25	25	26		11288	9736.62	15707.2	15917.9
KDM6B	Homo sapiens	Lysine-specific demethylase 6B	KDM6B_HUMAN	6	0	5	6	5	6		2945.85	2532.63	2208.78	3153.54
ZBTB5	Homo sapiens	Zinc finger and BTB domain-containing protein 5	ZBTB5_HUMAN	6	0	6	6	6	6		1309.66	1487.99	2122.88	1325.46
PFAS	Homo sapiens	Phosphoribosylformylglycinamidine synthase	PUR4_HUMAN	1	1	1	1	1	1	607.826	649.236	624.107	687.744	571.936
MCF2L	Homo sapiens	Guanine nucleotide exchange factor DBS	MCF2L_HUMAN	4	0	3	4	4	4		488.298	643.099	998.482	647.08
ANKRD28	Homo sapiens	Serine/threonine-protein phosphatase 6 regulatory ankyrin repeat subunit A	ANR28_HUMAN	12	0	12	12	13	11		2017.61	1813.53	2471.64	1767.63
PRORP	Homo sapiens	Mitochondrial ribonuclease P catalytic subunit	MRPP3_HUMAN	24	0	28	28	28	28		28725.1	20041	35809.1	25301.6
LSM1	Homo sapiens	U6 snRNA-associated Sm-like protein LSm1	LSM1_HUMAN	5	0	6	6	6	4		15433.6	19652	21162.4	2870.97
TBX3	Homo sapiens	T-box transcription factor TBX3	TBX3_HUMAN	29	0	29	31	31	29		25691.4	24760.4	39100.1	25027
DEGS1	Homo sapiens	Sphingolipid delta(4)-desaturase DES1	DEGS1_HUMAN	3	0	5	4	5	5		1757.2	1690.49	2555.99	2339.47
SCAMP2	Homo sapiens	Secretory carrier-associated membrane protein 2	SCAM2_HUMAN	1	0	1	1	1	1		152.554	238.939	190.002	139.177
KPNA5	Homo sapiens	Importin subunit alpha-6	IMA6_HUMAN	1	0	1	1	1	1		74.9502	84.9129	121.319	37.7474
ARPC1B	Homo sapiens	Actin-related protein 2/3 complex subunit 1B	ARC1B_HUMAN	14	3	13	14	13	13	208.884	5446.46	4315.64	6959.01	4947.85
ARPC2	Homo sapiens	Actin-related protein 2/3 complex subunit 2	ARPC2_HUMAN	17	6	19	16	18	17	1917.71	13453.8	11350.8	19974.2	13455.3
ARPC3	Homo sapiens	Actin-related protein 2/3 complex subunit 3	ARPC3_HUMAN	8	0	8	8	8	8		6423.03	6355.68	11048.2	7912.38
BET1	Homo sapiens	BET1 homolog	BET1_HUMAN	1	0	2	1	1	1		302.026	223.513	403.497	203.565
ZBTB7B	Homo sapiens	Zinc finger and BTB domain-containing protein 7B	ZBT7B_HUMAN	15	0	20	16	20	15		8232.16	6228.66	27925.9	4189.19
POLR1C	Homo sapiens	DNA-directed RNA polymerases I and III subunit RPAC1	RPAC1_HUMAN	26	1	32	31	33	32	8.16095	121507	70436.6	155901	83931.1
TRIM24	Homo sapiens	Transcription intermediary factor 1-alpha	TIF1A_HUMAN	24	0	25	23	24	24		12444.1	11175	13789.8	11773.5
WDR46	Homo sapiens	WD repeat-containing protein 46	WDR46_HUMAN	16	1	15	16	17	14	7.01285	6876.27	4467.54	11124.6	6884.73
NKRF	Homo sapiens	NF-kappa-B-repressing factor	NKRF_HUMAN	70	1	90	90	90	88	22.2774	290110	214126	342567	293576
LAMA5	Homo sapiens	Laminin subunit alpha-5	LAMA5_HUMAN	57	0	55	49	58	47		16324.1	13397.1	27451.4	8178.27
ZNF185	Homo sapiens	Zinc finger protein 185	ZN185_HUMAN	4	0	0	4	0	0			862.536
CASC3	Homo sapiens	Protein CASC3	CASC3_HUMAN	10	0	9	10	10	10		10787.1	4631.19	8450.65	10028.1
MRPS12	Homo sapiens	Small ribosomal subunit protein uS12m	RT12_HUMAN	5	0	5	5	5	5		11512	9051.2	14636.4	11415
RER1	Homo sapiens	Protein RER1	RER1_HUMAN	9	0	11	11	11	10		45867	41602.7	60662.9	33716.3
SURF4	Homo sapiens	Surfeit locus protein 4	SURF4_HUMAN	11	2	13	13	13	13	207.065	36851.4	31512.2	49633.6	27946.6
ATXN7	Homo sapiens	Ataxin-7	ATX7_HUMAN	11	0	9	9	11	10		3571.19	1574.83	5307.03	2875.04
SPTLC1	Homo sapiens	Serine palmitoyltransferase 1	SPTC1_HUMAN	16	1	15	16	16	15	23.9782	4221.39	4048.98	6404.35	4160.33
FANCG	Homo sapiens	Fanconi anemia group G protein	FANCG_HUMAN	6	0	6	4	6	5		834.618	441.188	1210.47	443.107
OGT	Homo sapiens	UDP-N-acetylglucosamine--peptide N-acetylglucosaminyltransferase 110 kDa subunit	OGT1_HUMAN	42	0	43	46	46	44		31696.2	27634.3	45610.9	29490.9
PPM1D	Homo sapiens	Protein phosphatase 1D	PPM1D_HUMAN	13	0	13	13	13	10		3465.2	2377.96	4680.41	2324.92
TM9SF1	Homo sapiens	Transmembrane 9 superfamily member 1	TM9S1_HUMAN	12	0	11	13	12	12		6412.19	6174.38	7997.26	7243.4
HMGB3	Homo sapiens	High mobility group protein B3	HMGB3_HUMAN	13	0	16	15	16	11		16759.4	12129.2	20609.5	3620.27
FANCA	Homo sapiens	Fanconi anemia group A protein	FANCA_HUMAN	12	0	11	12	11	10		2273.72	2350.66	2948.08	2000.05
SOX12	Homo sapiens	Transcription factor SOX-12	SOX12_HUMAN	2	0	2	1	1	0		125.642	84.7195	132.961
EIF3D	Homo sapiens	Eukaryotic translation initiation factor 3 subunit D	EIF3D_HUMAN	22	6	24	22	24	23	1147.43	11160.1	8382.93	16010	14643.8
EIF3H	Homo sapiens	Eukaryotic translation initiation factor 3 subunit H	EIF3H_HUMAN	18	6	16	15	16	16	1230.36	4351.43	2472.4	5190.89	5180.98
HDAC3	Homo sapiens	Histone deacetylase 3	HDAC3_HUMAN	14	0	15	13	14	16		4583.82	5083.11	5664.85	6368.39
NVL	Homo sapiens	Nuclear valosin-containing protein-like	NVL_HUMAN	41	0	45	44	45	44		24557.2	17415.3	37984.5	26624
BIRC5	Homo sapiens	Baculoviral IAP repeat-containing protein 5	BIRC5_HUMAN	7	0	8	7	8	8		2120.88	983.394	2517.36	1662.09
TMPRSS2	Homo sapiens	Transmembrane protease serine 2	TMPS2_HUMAN	1	0	1	0	1	1		720.132		406.151	599.867
NCAM2	Homo sapiens	Neural cell adhesion molecule 2	NCAM2_HUMAN	18	0	18	16	17	17		5173.61	4170.97	7327.08	4876.12
IPO8	Homo sapiens	Importin-8	IPO8_HUMAN	11	0	10	11	10	10		3070.69	2845.26	4887.54	3062.09
TOX3	Homo sapiens	TOX high mobility group box family member 3	TOX3_HUMAN	10	0	10	11	11	12		25969.7	19994.8	38207.2	18687.6
TNRC18	Homo sapiens	Trinucleotide repeat-containing gene 18 protein	TNC18_HUMAN	36	0	32	32	34	31		7691.35	6945.15	11937.5	10440.2
SLC31A1	Homo sapiens	High affinity copper uptake protein 1	COPT1_HUMAN	2	0	2	2	2	2		303.87	352.02	442.128	245.181
ABCC4	Homo sapiens	ATP-binding cassette sub-family C member 4	MRP4_HUMAN	56	0	58	61	61	59		58321.2	50242	80269.4	45942.4
POLR1G	Homo sapiens	DNA-directed RNA polymerase I subunit RPA34	RPA34_HUMAN	32	0	37	37	37	37		168657	101052	210431	146825
CAPN5	Homo sapiens	Calpain-5	CAN5_HUMAN	25	0	30	30	30	28		43934.9	20020.3	24727	49780.3
NUP42	Homo sapiens	Nucleoporin NUP42	NUP42_HUMAN	13	0	14	14	14	14		10021.9	9165.64	16192.5	8679.18
ARPC5	Homo sapiens	Actin-related protein 2/3 complex subunit 5	ARPC5_HUMAN	6	2	6	6	6	6	77.5372	1830.37	1571.18	2155.77	1710.37
NKX2-8;NKX2-2	Homo sapiens	Homeobox protein Nkx-2.8;Homeobox protein Nkx-2.2	NKX28_HUMAN;NKX22_HUMAN	1	0	1	1	1	1		708.662	368.371	1003.1	794.767
DDX3Y	Homo sapiens	ATP-dependent RNA helicase DDX3Y	DDX3Y_HUMAN	14	0	16	15	15	15		26777.6	11231.2	38125.2	20929.4
MAFG	Homo sapiens	Transcription factor MafG	MAFG_HUMAN	2	0	2	2	2	2		607.206	276.521	688.81	389.837
OGG1	Homo sapiens	N-glycosylase/DNA lyase	OGG1_HUMAN	4	0	4	4	4	3		1271.21	1112.1	1490.92	888.944
TAPBP	Homo sapiens	Tapasin	TPSN_HUMAN	2	0	2	2	1	1		964.242	575.759	714.628	632.66
KDM6A	Homo sapiens	Lysine-specific demethylase 6A	KDM6A_HUMAN	38	0	39	37	37	40		24433.3	19602.1	25735.4	19155.9
DHX15	Homo sapiens	ATP-dependent RNA helicase DHX15	DHX15_HUMAN	108	10	165	164	166	165	1034.85	10514029	7638260	8971907	12237209
RNMT	Homo sapiens	mRNA cap guanine-N7 methyltransferase	MCES_HUMAN	28	0	33	32	33	30		56495.8	58275.1	111814	38970.4
ZZEF1	Homo sapiens	Zinc finger ZZ-type and EF-hand domain-containing protein 1	ZZEF1_HUMAN	10	1	8	6	8	6	133.923	848.734	753.577	1065.44	905.449
TET3	Homo sapiens	Methylcytosine dioxygenase TET3	TET3_HUMAN	15	0	14	13	14	7		1692.14	1873.58	3502.49	480.694
RRP8	Homo sapiens	Ribosomal RNA-processing protein 8	RRP8_HUMAN	24	0	30	30	31	31		34233.6	23982.3	44072	39950.6
SIPA1L1	Homo sapiens	Signal-induced proliferation-associated 1-like protein 1	SI1L1_HUMAN	71	0	75	70	72	70		48879.6	40735.9	76140.2	47231.6
ZBTB24	Homo sapiens	Zinc finger and BTB domain-containing protein 24	ZBT24_HUMAN	4	0	5	5	5	4		1037.97	864.346	1280.42	996.514
PRPF4	Homo sapiens	U4/U6 small nuclear ribonucleoprotein Prp4	PRP4_HUMAN	44	2	56	55	56	56	56.0422	287271	177793	348474	440877
PHGDH	Homo sapiens	D-3-phosphoglycerate dehydrogenase	SERA_HUMAN	34	1	40	40	40	37	27.923	123050	108620	143064	114346
NDUFS4	Homo sapiens	NADH dehydrogenase [ubiquinone] iron-sulfur protein 4, mitochondrial	NDUS4_HUMAN	5	0	6	5	5	5		5451.44	3894.29	6401.92	3547.33
ARHGAP6	Homo sapiens	Rho GTPase-activating protein 6	RHG06_HUMAN	3	0	3	3	3	3		888.716	967.268	1403.3	996.438
PHF1	Homo sapiens	PHD finger protein 1	PHF1_HUMAN	5	0	4	4	5	4		768.647	744.333	3107.15	1176.34
SEPTIN4	Homo sapiens	Septin-4	SEPT4_HUMAN	1	0	1	1	1	1		26807.7	14901.7	43116.8	15286.3
DYNC1LI2	Homo sapiens	Cytoplasmic dynein 1 light intermediate chain 2	DC1L2_HUMAN	6	1	5	3	5	6	49.6615	1320.32	726.336	2029.92	1088.22
KLK10	Homo sapiens	Kallikrein-10	KLK10_HUMAN	2	0	2	2	1	2		521.202	1465.93	124.502	372.316
PSMD3	Homo sapiens	26S proteasome non-ATPase regulatory subunit 3	PSMD3_HUMAN	30	1	31	32	31	33	98.39	23792.2	19393.5	31940	27363.7
RBFOX2	Homo sapiens	RNA binding protein fox-1 homolog 2	RFOX2_HUMAN	15	1	15	16	15	16	22.3527	13014.4	56284.2	23373.4	26105.7
ZW10	Homo sapiens	Centromere/kinetochore protein zw10 homolog	ZW10_HUMAN	16	0	16	16	16	16		6210.33	4849.15	7932.49	5299.47
SPINT1	Homo sapiens	Kunitz-type protease inhibitor 1	SPIT1_HUMAN	2	0	1	0	2	1		87.4003		379.733	101.775
SART1	Homo sapiens	U4/U6.U5 tri-snRNP-associated protein 1	SNUT1_HUMAN	84	0	106	106	108	106		314794	167621	371027	456216
SPINT2	Homo sapiens	Kunitz-type protease inhibitor 2	SPIT2_HUMAN	8	0	8	7	8	7		3646.65	2231.53	3346.78	832.954
GPAA1	Homo sapiens	Glycosylphosphatidylinositol anchor attachment 1 protein	GPAA1_HUMAN	6	0	5	6	6	6		2204.01	21375.2	4708.55	2618
DAPK3	Homo sapiens	Death-associated protein kinase 3	DAPK3_HUMAN	7	0	7	7	7	6		2314.04	1778.86	3331.59	2015.83
TGFB1I1	Homo sapiens	Transforming growth factor beta-1-induced transcript 1 protein	TGFI1_HUMAN	1	1	1	0	0	0	173.366	91.7855
ZBTB43	Homo sapiens	Zinc finger and BTB domain-containing protein 43	ZBT43_HUMAN	3	0	3	3	3	3		1195.18	856.908	1535.79	1863.81
ADCY6	Homo sapiens	Adenylate cyclase type 6	ADCY6_HUMAN	1	0	1	1	1	0		129.333	245.349	296.687
ATMIN	Homo sapiens	ATM interactor	ATMIN_HUMAN	1	0	0	1	1	0			18.081	21.2646
PPIP5K2	Homo sapiens	Inositol hexakisphosphate and diphosphoinositol-pentakisphosphate kinase 2	VIP2_HUMAN	3	0	3	2	2	2		217.298	130.942	296.74	121.574
MAP3K7	Homo sapiens	Mitogen-activated protein kinase kinase kinase 7	M3K7_HUMAN	1	1	1	1	1	0	25.0512	211.498	177.815	178.87
EEF1E1	Homo sapiens	Eukaryotic translation elongation factor 1 epsilon-1	MCA3_HUMAN	12	0	14	15	15	14		35609.8	13932.9	37334.4	15402.4
MSI1	Homo sapiens	RNA-binding protein Musashi homolog 1	MSI1H_HUMAN	23	1	22	23	24	23	34.7898	15244.9	17528.1	28663.7	11239.4
HNRNPR	Homo sapiens	Heterogeneous nuclear ribonucleoprotein R	HNRPR_HUMAN	58	0	84	84	84	84		927637	907456	1.21349e+06	1.18519e+06
PRPF3	Homo sapiens	U4/U6 small nuclear ribonucleoprotein Prp3	PRPF3_HUMAN	59	1	76	70	78	77	17.6785	273820	151934	312860	391942
EMC8	Homo sapiens	ER membrane protein complex subunit 8	EMC8_HUMAN	5	0	4	5	5	5		13922.5	7745.73	15340.6	13642
ERI3	Homo sapiens	ERI1 exoribonuclease 3	ERI3_HUMAN	16	0	17	17	19	18		18183.2	41519.7	44218.7	32688.2
SYNJ1	Homo sapiens	Synaptojanin-1	SYNJ1_HUMAN	22	10	22	22	20	17	1243.64	11541.2	3904.76	4962.08	4917.28
FIBP	Homo sapiens	Acidic fibroblast growth factor intracellular-binding protein	FIBP_HUMAN	14	0	14	12	13	15		4614.92	2735.01	6752.52	5085.17
EIF4G3	Homo sapiens	Eukaryotic translation initiation factor 4 gamma 3	IF4G3_HUMAN	20	0	15	17	19	18		4582.65	3934.56	7030.2	6286.22
PPIH	Homo sapiens	Peptidyl-prolyl cis-trans isomerase H	PPIH_HUMAN	23	2	26	25	25	26	59.9139	58473	33868.1	64758.1	92228.8
MBTPS2	Homo sapiens	Membrane-bound transcription factor site-2 protease	MBTP2_HUMAN	1	0	1	1	1	1		324.955	334.1	383.288	217.398
KLF4	Homo sapiens	Krueppel-like factor 4	KLF4_HUMAN	5	0	5	4	5	4		6263.8	3124.65	6389.41	3379.87
EPB41L2	Homo sapiens	Band 4.1-like protein 2	E41L2_HUMAN	10	0	10	9	10	8		2225.42	1311.99	4347.24	927.991
B4GAT1	Homo sapiens	Beta-1,4-glucuronyltransferase 1	B4GA1_HUMAN	1	0	1	0	1	1		105.175		222.569	127.158
MED7	Homo sapiens	Mediator of RNA polymerase II transcription subunit 7	MED7_HUMAN	7	0	7	5	7	6		1159.5	750.931	1528.4	1009.42
XRCC3	Homo sapiens	DNA repair protein XRCC3	XRCC3_HUMAN	6	0	6	5	5	5		933.354	1375.1	882.297	865.442
TGM5	Homo sapiens	Protein-glutamine gamma-glutamyltransferase 5	TGM5_HUMAN	5	0	4	5	5	2		418.337	1472.58	1625.79	82.369
SYT7	Homo sapiens	Synaptotagmin-7	SYT7_HUMAN	21	1	22	20	22	22	20.3384	16484.6	12143.6	24711.6	17098.7
DENR	Homo sapiens	Density-regulated protein	DENR_HUMAN	6	1	5	3	5	5	84.1222	1518.61	795.72	1582.59	1494.19
XPOT	Homo sapiens	Exportin-T	XPOT_HUMAN	38	1	42	41	43	42	9.57479	22973.3	17102.3	27555.7	17796.4
TIMM44	Homo sapiens	Mitochondrial import inner membrane translocase subunit TIM44	TIM44_HUMAN	5	0	5	5	5	4		466.869	314.925	332.499	440.101
TRAPPC3	Homo sapiens	Trafficking protein particle complex subunit 3	TPPC3_HUMAN	6	1	6	6	6	5	14.2913	9903.33	8822.4	13128	10489.8
CHMP2A	Homo sapiens	Charged multivesicular body protein 2a	CHM2A_HUMAN	6	0	6	5	6	6		2925.43	2396.13	4919.77	2796.6
PLRG1	Homo sapiens	Pleiotropic regulator 1	PLRG1_HUMAN	50	0	81	78	82	81		386297	211799	376345	506740
PRC1	Homo sapiens	Protein regulator of cytokinesis 1	PRC1_HUMAN	68	0	85	84	87	77		266524	165585	378706	113617
ZNF207	Homo sapiens	BUB3-interacting and GLEBS motif-containing protein ZNF207	ZN207_HUMAN	22	1	35	31	35	36	73.753	269524	250552	513322	793406
NDUFB5	Homo sapiens	NADH dehydrogenase [ubiquinone] 1 beta subcomplex subunit 5, mitochondrial	NDUB5_HUMAN	6	0	7	6	7	6		5545.58	4338.7	7120.08	3349.91
NDUFB3	Homo sapiens	NADH dehydrogenase [ubiquinone] 1 beta subcomplex subunit 3	NDUB3_HUMAN	6	0	6	5	5	5		6750.01	5784.65	8610.05	4550.14
NDUFA2	Homo sapiens	NADH dehydrogenase [ubiquinone] 1 alpha subcomplex subunit 2	NDUA2_HUMAN	4	0	4	4	4	4		4743.47	3117.91	5704.59	2437.88
BUB3	Homo sapiens	Mitotic checkpoint protein BUB3	BUB3_HUMAN	33	1	43	44	45	45	56.1145	797581	707428	1.29654e+06	1.87176e+06
ACTN4	Homo sapiens	Alpha-actinin-4	ACTN4_HUMAN	35	9	34	33	31	33	1224.23	7922.02	11475.5	10053.7	7733.64
BUD23	Homo sapiens	Probable 18S rRNA (guanine-N(7))-methyltransferase	BUD23_HUMAN	9	0	10	9	10	9		9412.17	8729.94	21676.9	5416.32
HTATSF1	Homo sapiens	HIV Tat-specific factor 1	HTSF1_HUMAN	16	0	15	13	13	15		4982.88	3492.76	3812.89	6893.88
PRKAB2;PRKAB1	Homo sapiens	5'-AMP-activated protein kinase subunit beta-2;5'-AMP-activated protein kinase subunit beta-1	AAKB2_HUMAN;AAKB1_HUMAN	1	0	1	1	1	1		80.8243	93.9623	80.7995	25.1367
AP1G1	Homo sapiens	AP-1 complex subunit gamma-1	AP1G1_HUMAN	31	1	30	30	28	27	6.75329	16777.5	15292.4	21723.1	17151.8
SYNGR2	Homo sapiens	Synaptogyrin-2	SNG2_HUMAN	4	0	4	3	4	4		2253.17	1582.17	2646.35	1815.1
SLC25A20	Homo sapiens	Mitochondrial carnitine/acylcarnitine carrier protein	MCAT_HUMAN	16	0	15	15	16	16		13786.3	12221.5	17648.8	15970.1
NARS1	Homo sapiens	Asparagine--tRNA ligase, cytoplasmic	SYNC_HUMAN	6	0	6	5	6	4		674.287	890.807	2581.78	495.799
SPOP	Homo sapiens	Speckle-type POZ protein	SPOP_HUMAN	10	0	9	8	11	11		2799.93	2792.86	7520.79	4527.54
MYO1B	Homo sapiens	Unconventional myosin-Ib	MYO1B_HUMAN	58	28	65	66	64	63	11605.4	88272.2	69379.4	111021	74077.5
SLC25A17	Homo sapiens	Peroxisomal membrane protein PMP34	PM34_HUMAN	9	0	10	11	11	9		3470.75	3047.19	5007.5	2652.13
NUDT21	Homo sapiens	Cleavage and polyadenylation specificity factor subunit 5	CPSF5_HUMAN	35	0	43	56	57	51		243294	3.23522e+06	5695783	910180
LANCL1	Homo sapiens	Glutathione S-transferase LANCL1	LANC1_HUMAN	5	1	4	5	5	5	2.69126	1306.17	1680.96	1757.26	1635.23
RRP9	Homo sapiens	U3 small nucleolar RNA-interacting protein 2	U3IP2_HUMAN	20	0	21	21	21	22		26407.3	14956.4	29921.6	41173.8
SCO2	Homo sapiens	Protein SCO2 homolog, mitochondrial	SCO2_HUMAN	4	0	5	5	5	5		2377.66	1539.68	3530.95	2491.26
AKAP8	Homo sapiens	A-kinase anchor protein 8	AKAP8_HUMAN	28	1	28	28	28	27	40.2004	30616.1	25954.8	38245.6	36216.5
GTPBP6	Homo sapiens	Putative GTP-binding protein 6	GTPB6_HUMAN	23	0	26	25	27	26		19758.7	15993	24754.7	19424
SLC37A4	Homo sapiens	Glucose-6-phosphate exchanger SLC37A4	G6PT1_HUMAN	2	0	2	2	2	2		1288.66	1312.38	1835.73	1315.2
IDH3B	Homo sapiens	Isocitrate dehydrogenase [NAD] subunit beta, mitochondrial	IDH3B_HUMAN	9	1	8	9	9	8	183.022	2663.83	2307.21	3797.92	2609.45
CALU	Homo sapiens	Calumenin	CALU_HUMAN	2	2	2	1	1	1	289.317	138.958	51.3917	96.1362	110.73
ATP9B	Homo sapiens	Probable phospholipid-transporting ATPase IIB	ATP9B_HUMAN	11	0	10	11	9	8		8263.57	3305.43	2960.96	6312.51
AHCYL1	Homo sapiens	S-adenosylhomocysteine hydrolase-like protein 1	SAHH2_HUMAN	2	1	1	1	1	1	20.8224	648.554	151.698	400.249	436.666
KIF1C	Homo sapiens	Kinesin-like protein KIF1C	KIF1C_HUMAN	10	0	10	7	10	8		914.693	491.139	1916.14	914.207
ORC5	Homo sapiens	Origin recognition complex subunit 5	ORC5_HUMAN	24	0	28	27	28	28		28075.2	18314	38103.3	22036.8
NDUFS5	Homo sapiens	NADH dehydrogenase [ubiquinone] iron-sulfur protein 5	NDUS5_HUMAN	9	0	9	9	9	9		14521.5	11569.1	18820.1	10753.5
ORC4	Homo sapiens	Origin recognition complex subunit 4	ORC4_HUMAN	21	0	21	22	21	21		8154.79	7448.9	11429.5	8091.79
RAD21	Homo sapiens	Double-strand-break repair protein rad21 homolog	RAD21_HUMAN	30	1	33	32	34	33	86.5678	30249.9	21017.3	40583.3	33486
AKR1B10	Homo sapiens	Aldo-keto reductase family 1 member B10	AK1BA_HUMAN	3	0	0	3	0	0			487.755
DHX16	Homo sapiens	Pre-mRNA-splicing factor ATP-dependent RNA helicase DHX16	DHX16_HUMAN	47	0	47	48	47	51		16050	22329.6	21375.8	71415.9
PPP1R12B	Homo sapiens	Protein phosphatase 1 regulatory subunit 12B	MYPT2_HUMAN	21	0	19	17	20	20		5114.59	3337.81	9480.24	7213.82
HS6ST1;HS6ST3;HS6ST2	Homo sapiens	Heparan-sulfate 6-O-sulfotransferase 1;Heparan-sulfate 6-O-sulfotransferase 3;Heparan-sulfate 6-O-sulfotransferase 2	H6ST1_HUMAN;H6ST3_HUMAN;H6ST2_HUMAN	1	0	1	1	1	0		350.243	263.642	415.127
MED14	Homo sapiens	Mediator of RNA polymerase II transcription subunit 14	MED14_HUMAN	64	0	72	72	72	65		80314.4	60003.9	123800	53888.4
PRPSAP2	Homo sapiens	Phosphoribosyl pyrophosphate synthase-associated protein 2	KPRB_HUMAN	9	0	8	5	9	9		2436.6	568.863	2681.04	2320.07
SMARCA5	Homo sapiens	SWI/SNF-related matrix-associated actin-dependent regulator of chromatin subfamily A member 5	SMCA5_HUMAN	85	1	104	102	107	101	41.2465	279574	154120	363124	235685
ZNF292	Homo sapiens	Zinc finger protein 292	ZN292_HUMAN	15	0	14	14	13	12		1989.51	1253.32	2766.32	1487.15
URB1	Homo sapiens	Nucleolar pre-ribosomal-associated protein 1	NPA1P_HUMAN	64	0	69	66	70	68		41662.4	30104.6	52127.7	32712.1
SIPA1L3	Homo sapiens	Signal-induced proliferation-associated 1-like protein 3	SI1L3_HUMAN	53	0	50	53	56	52		28509.5	23797.1	50210.3	27729.4
ZFC3H1	Homo sapiens	Zinc finger C3H1 domain-containing protein	ZC3H1_HUMAN	30	0	25	25	27	30		5902.64	4239.73	9615.95	9047.71
AQR	Homo sapiens	RNA helicase aquarius	AQR_HUMAN	131	2	165	168	169	169	97.2041	713652	702557	855466	1.23634e+06
MAST3	Homo sapiens	Microtubule-associated serine/threonine-protein kinase 3	MAST3_HUMAN	2	0	2	1	1	1		261.245	38.852	64.0637	91.2645
OPA1	Homo sapiens	Dynamin-like 120 kDa protein, mitochondrial	OPA1_HUMAN	51	3	56	55	56	56	15.6574	44954.3	31896.2	54813.1	39757.7
MCM3AP	Homo sapiens	Germinal-center associated nuclear protein	GANP_HUMAN	55	0	56	57	59	56		46674.1	35611.9	69824.9	44324.9
KIF1B	Homo sapiens	Kinesin-like protein KIF1B	KIF1B_HUMAN	6	0	5	5	6	4		717.945	544.782	1410.4	654.333
KDM1A	Homo sapiens	Lysine-specific histone demethylase 1A	KDM1A_HUMAN	37	1	48	48	49	47	65.1546	83661.8	65290.1	103263	66270
FADS1	Homo sapiens	Acyl-CoA (8-3)-desaturase	FADS1_HUMAN	4	0	4	4	3	4		2350	1794.51	2567.71	1997.68
PPL	Homo sapiens	Periplakin	PEPL_HUMAN	33	0	20	33	22	19		4235.58	12548.1	7318.81	2891.4
MAN1A2	Homo sapiens	Mannosyl-oligosaccharide 1,2-alpha-mannosidase IB	MA1A2_HUMAN	13	0	9	10	13	11		1281.35	1842.84	2403.4	1308.67
ACSL4	Homo sapiens	Long-chain-fatty-acid--CoA ligase 4	ACSL4_HUMAN	3	3	2	2	2	0	890.362	1277.28	374.288	507.518
SYNCRIP	Homo sapiens	Heterogeneous nuclear ribonucleoprotein Q	HNRPQ_HUMAN	55	8	79	79	82	78	995.2	571422	813567	1.03527e+06	776198
CDC40	Homo sapiens	Pre-mRNA-processing factor 17	PRP17_HUMAN	45	0	51	49	52	53		70724.7	71844.6	80855	233273
RANBP6	Homo sapiens	Ran-binding protein 6	RNBP6_HUMAN	34	1	34	34	34	31	3.16368	23131.3	18808.7	33382.7	27985.9
NEMF	Homo sapiens	Ribosome quality control complex subunit NEMF	NEMF_HUMAN	21	0	20	20	21	18		15321.1	5446.41	19269.2	9065.45
CCNT1	Homo sapiens	Cyclin-T1	CCNT1_HUMAN	23	0	28	28	28	27		14404.3	12269.4	21119.3	20045.8
BUB1B	Homo sapiens	Mitotic checkpoint serine/threonine-protein kinase BUB1 beta	BUB1B_HUMAN	6	0	5	4	5	5		1038.63	482.746	688.524	1429.64
EIF4E2	Homo sapiens	Eukaryotic translation initiation factor 4E type 2	IF4E2_HUMAN	11	0	10	10	11	10		3291.16	4687.86	6550.07	5643.85
CCNT2	Homo sapiens	Cyclin-T2	CCNT2_HUMAN	11	0	11	11	11	11		3166.82	2242.31	5332.94	4375.89
DIAPH1	Homo sapiens	Protein diaphanous homolog 1	DIAP1_HUMAN	13	2	11	9	11	11	188.324	2855.61	1504.35	3633.45	1653.71
EXOC3	Homo sapiens	Exocyst complex component 3	EXOC3_HUMAN	26	0	27	26	26	24		10998	7862.26	15428.1	11440.4
PDE8A	Homo sapiens	High affinity cAMP-specific and IBMX-insensitive 3',5'-cyclic phosphodiesterase 8A	PDE8A_HUMAN	2	0	2	1	2	2		93.6589	14.9292	117.332	90.0005
SLC16A7	Homo sapiens	Monocarboxylate transporter 2	MOT2_HUMAN	2	0	2	2	2	1		180.165	179.975	142.196	47.4992
MAFK	Homo sapiens	Transcription factor MafK	MAFK_HUMAN	1	0	1	0	1	1		149.401		253.462	48.1999
PRMT3	Homo sapiens	Protein arginine N-methyltransferase 3	ANM3_HUMAN	4	0	4	1	4	3		365.299	87.2217	592.351	189.42
PEX10	Homo sapiens	Peroxisome biogenesis factor 10	PEX10_HUMAN	5	0	5	5	5	5		1989.25	1359.16	2235.33	1700.34
KPNA6	Homo sapiens	Importin subunit alpha-7	IMA7_HUMAN	16	0	19	17	19	17		10945	18177.2	19732.4	8624.56
CTNND1	Homo sapiens	Catenin delta-1	CTND1_HUMAN	67	5	92	92	94	91	395.818	330286	272116	434266	352648
ICMT	Homo sapiens	Protein-S-isoprenylcysteine O-methyltransferase	ICMT_HUMAN	7	0	6	6	7	7		4876.89	5096.85	7400.63	4598.19
DPM1	Homo sapiens	Dolichol-phosphate mannosyltransferase subunit 1	DPM1_HUMAN	17	0	18	17	19	18		23561.6	21316	33005.9	24935.2
USO1	Homo sapiens	General vesicular transport factor p115	USO1_HUMAN	17	0	18	17	18	18		4083.6	3624.32	5270.77	3392.1
ZNF354A	Homo sapiens	Zinc finger protein 354A	Z354A_HUMAN	6	0	6	4	6	6		1069.18	548.443	1401.37	1368.67
SLC19A2	Homo sapiens	Thiamine transporter 1	S19A2_HUMAN	1	0	1	1	1	1		268.466	148.2	207.276	271.096
MRPS14	Homo sapiens	Small ribosomal subunit protein uS14m	RT14_HUMAN	3	0	4	4	4	4		1414.48	1588.99	1881.81	1698.3
TOM1	Homo sapiens	Target of Myb1 membrane trafficking protein	TOM1_HUMAN	3	0	2	3	3	3		172.845	211.851	419.47	343.79
PQBP1	Homo sapiens	Polyglutamine-binding protein 1	PQBP1_HUMAN	9	0	11	11	11	11		50104.7	34384.3	35579.2	90275.3
TIMM17B	Homo sapiens	Mitochondrial import inner membrane translocase subunit Tim17-B	TI17B_HUMAN	4	0	4	4	4	3		3442.66	2852.29	2940.61	2621.54
PRAF2	Homo sapiens	PRA1 family protein 2	PRAF2_HUMAN	1	0	1	1	1	1		721.793	573.464	862.612	540.275
DKC1	Homo sapiens	H/ACA ribonucleoprotein complex subunit DKC1	DKC1_HUMAN	47	1	62	59	62	56	11.8111	207214	205084	350587	215640
EIF5B	Homo sapiens	Eukaryotic translation initiation factor 5B	IF2P_HUMAN	22	3	20	19	20	19	74.0434	5227.22	2749.05	7600.85	4774.58
EDF1	Homo sapiens	Endothelial differentiation-related factor 1	EDF1_HUMAN	3	0	3	3	3	3		893.748	1703.17	2937.44	1750.93
KIN	Homo sapiens	DNA/RNA-binding protein KIN17	KIN17_HUMAN	23	0	23	26	26	28		10350.7	6850.93	15012	26878.3
DIAPH2	Homo sapiens	Protein diaphanous homolog 2	DIAP2_HUMAN	14	0	14	13	14	11		3872.39	2018.38	5472.35	2607.14
DNAJA2	Homo sapiens	DnaJ homolog subfamily A member 2	DNJA2_HUMAN	22	2	27	26	27	25	198.628	32527.3	23483.2	39014.4	27914
BRD4	Homo sapiens	Bromodomain-containing protein 4	BRD4_HUMAN	19	0	20	18	19	19		13805.2	6877.88	16119.3	12841.1
OPHN1	Homo sapiens	Oligophrenin-1	OPHN1_HUMAN	7	0	7	6	6	6		1456.68	894.397	1365.82	1230.84
TBL1X	Homo sapiens	F-box-like/WD repeat-containing protein TBL1X	TBL1X_HUMAN	20	2	21	22	20	22	25.3235	10409.9	11182.6	13036.2	14273.4
CTSV	Homo sapiens	Cathepsin L2	CATL2_HUMAN	13	0	13	11	13	9		3267.17	1943.57	5336.93	1266.15
HUS1	Homo sapiens	Checkpoint protein HUS1	HUS1_HUMAN	4	0	4	4	4	4		494.782	582.401	727.713	643.017
RNASEH1	Homo sapiens	Ribonuclease H1	RNH1_HUMAN	7	0	6	3	8	2		691.931	100.837	5525.99	72.3411
NBN	Homo sapiens	Nibrin	NBN_HUMAN	35	1	36	34	35	34	41.1628	20812.5	12470.9	26135.4	19489.2
DTNB	Homo sapiens	Dystrobrevin beta	DTNB_HUMAN	33	0	36	35	36	35		27381.5	19833.1	35055.9	23388.8
RNGTT	Homo sapiens	mRNA-capping enzyme	MCE1_HUMAN	24	0	25	23	25	21		12491.1	8504.51	17682.2	13186.1
ABCB7	Homo sapiens	Iron-sulfur clusters transporter ABCB7, mitochondrial	ABCB7_HUMAN	15	0	14	15	12	13		4893.52	4548.54	5037.38	4120.27
SRGAP2	Homo sapiens	SLIT-ROBO Rho GTPase-activating protein 2	SRGP2_HUMAN	8	0	8	7	8	6		1116.24	613.061	1990.86	527.532
FAM20B	Homo sapiens	Glycosaminoglycan xylosylkinase	XYLK_HUMAN	3	0	2	3	3	2		1100.21	708.379	1150.16	718.79
WDR1	Homo sapiens	WD repeat-containing protein 1	WDR1_HUMAN	10	7	10	9	9	6	1007.57	5344.56	3579	3045.47	1041.44
ATP9A	Homo sapiens	Probable phospholipid-transporting ATPase IIA	ATP9A_HUMAN	6	1	5	4	5	3	15.1046	863.646	650.482	1349.97	822.329
ROCK2	Homo sapiens	Rho-associated protein kinase 2	ROCK2_HUMAN	4	2	2	3	1	0	73.0721	197.251	269.633	97.2815
CLASP2	Homo sapiens	CLIP-associating protein 2	CLAP2_HUMAN	34	0	36	33	36	35		15899.3	10470.1	20330.8	11254
ZNF623	Homo sapiens	Zinc finger protein 623	ZN623_HUMAN	6	0	4	6	4	5		501.139	3865.67	555.275	7544.31
PTCD1	Homo sapiens	Pentatricopeptide repeat-containing protein 1, mitochondrial	PTCD1_HUMAN	27	0	29	26	27	26		26320.2	15908.7	31164.6	17962.7
COBL	Homo sapiens	Protein cordon-bleu	COBL_HUMAN	33	0	34	31	34	33		19710.9	13035.8	27480	17964.9
CPNE3	Homo sapiens	Copine-3	CPNE3_HUMAN	23	0	24	23	23	23		16793.5	13684	18984	20158.3
HIP1R	Homo sapiens	Huntingtin-interacting protein 1-related protein	HIP1R_HUMAN	52	1	55	54	54	55	84.0886	49503.9	39812.9	63621.7	49433.9
RNF40	Homo sapiens	E3 ubiquitin-protein ligase BRE1B	BRE1B_HUMAN	14	0	13	13	13	13		1999.63	1326.73	2366.42	2143.73
PHF2	Homo sapiens	Lysine-specific demethylase PHF2	PHF2_HUMAN	43	0	46	45	49	48		48149.6	29465.6	66848	35089.6
ZC3H11A	Homo sapiens	Zinc finger CCCH domain-containing protein 11A	ZC11A_HUMAN	55	1	61	61	59	66	0.371189	61442.8	80238	78247.6	254121
CLUH	Homo sapiens	Clustered mitochondria protein homolog	CLU_HUMAN	4	0	4	3	4	4		492.94	329.906	576.528	518.537
NPHP4	Homo sapiens	Nephrocystin-4	NPHP4_HUMAN	4	0	4	3	4	4		433.134	126.6	553.368	162.78
KDM4A	Homo sapiens	Lysine-specific demethylase 4A	KDM4A_HUMAN	3	0	2	3	2	2		212.033	212.783	234.054	267.858
DNAJC13	Homo sapiens	DnaJ homolog subfamily C member 13	DJC13_HUMAN	101	3	105	99	108	101	56.2236	178594	109396	172864	179940
PPP6R2	Homo sapiens	Serine/threonine-protein phosphatase 6 regulatory subunit 2	PP6R2_HUMAN	2	0	2	1	2	2		181.106	1589.96	3299.23	967.481
CNOT3	Homo sapiens	CCR4-NOT transcription complex subunit 3	CNOT3_HUMAN	11	0	10	9	9	10		2356.37	1609.41	2995.4	2426.64
SS18L1	Homo sapiens	Calcium-responsive transactivator	CREST_HUMAN	3	0	2	3	2	3		605.397	489.743	618.257	858.479
ANKRD17	Homo sapiens	Ankyrin repeat domain-containing protein 17	ANR17_HUMAN	27	0	28	30	28	28		16833.2	17634.6	20915.6	16014.9
SIN3B	Homo sapiens	Paired amphipathic helix protein Sin3b	SIN3B_HUMAN	44	0	46	47	48	45		30537	17446.6	43357	23875.4
DNAJB6	Homo sapiens	DnaJ homolog subfamily B member 6	DNJB6_HUMAN	5	1	5	5	5	5	0.371201	4547.56	3293.73	3202.77	4145.9
GGCT	Homo sapiens	Gamma-glutamylcyclotransferase	GGCT_HUMAN	9	0	9	9	7	8		4517.89	6016.25	3249.28	2921.15
NDUFS7	Homo sapiens	NADH dehydrogenase [ubiquinone] iron-sulfur protein 7, mitochondrial	NDUS7_HUMAN	7	0	9	9	9	9		15234.2	12413.3	19140.1	11469.9
ZNF780A	Homo sapiens	Zinc finger protein 780A	Z780A_HUMAN	6	0	6	6	6	6		2015.56	1614.69	2840.84	2129.92
NDUFS2	Homo sapiens	NADH dehydrogenase [ubiquinone] iron-sulfur protein 2, mitochondrial	NDUS2_HUMAN	29	0	32	31	31	32		35761.9	29234.9	45213.2	24160.1
DUSP11	Homo sapiens	RNA/RNP complex-1-interacting phosphatase	DUS11_HUMAN	22	0	29	29	29	28		28577.4	27446.2	42015.9	26125.6
NIPSNAP2	Homo sapiens	Protein NipSnap homolog 2	NIPS2_HUMAN	20	0	22	22	21	22		40373.3	40515.1	60634.7	45511.6
HMMR	Homo sapiens	Hyaluronan mediated motility receptor	HMMR_HUMAN	47	0	50	47	50	47		67255.4	45470.7	110856	45178.7
PPFIA2	Homo sapiens	Liprin-alpha-2	LIPA2_HUMAN	34	0	33	31	35	32		21530.6	13272.3	30064	12893
PDCD6	Homo sapiens	Programmed cell death protein 6	PDCD6_HUMAN	13	0	16	16	16	16		37650.8	32974.5	54832.4	52803.4
ALOX12B	Homo sapiens	Arachidonate 12-lipoxygenase, 12R-type	LX12B_HUMAN	8	0	6	8	6	7		827.779	3374.93	1168.98	1094.29
ZNF253	Homo sapiens	Zinc finger protein 253	ZN253_HUMAN	2	0	2	2	2	2		817.85	550.951	785.048	561.084
ATP6V1G1	Homo sapiens	V-type proton ATPase subunit G 1	VATG1_HUMAN	1	0	1	1	1	1		343.882	319.987	628.33	393.188
VPS4B	Homo sapiens	Vacuolar protein sorting-associated protein 4B	VPS4B_HUMAN	13	2	13	12	13	13	104.215	7208.6	6089.24	8838.52	6250.75
MPDU1	Homo sapiens	Mannose-P-dolichol utilization defect 1 protein	MPU1_HUMAN	3	0	3	3	3	3		1148.06	1210.81	1168.02	1053.36
ZNF217	Homo sapiens	Zinc finger protein 217	ZN217_HUMAN	38	0	35	35	41	39		12698.8	8941.13	18845.5	10973.5
MACROH2A1	Homo sapiens	Core histone macro-H2A.1	H2AY_HUMAN	15	0	19	19	19	18		64098.2	59121	108783	86641.7
FLNB	Homo sapiens	Filamin-B	FLNB_HUMAN	204	11	264	261	265	259	14026	576270	516603	946665	793862
NCOR1	Homo sapiens	Nuclear receptor corepressor 1	NCOR1_HUMAN	43	0	44	44	43	41		11628	10788.6	17561.8	13027.2
NDUFS6	Homo sapiens	NADH dehydrogenase [ubiquinone] iron-sulfur protein 6, mitochondrial	NDUS6_HUMAN	5	0	6	6	6	6		5001.14	4265.09	5021.92	3040.81
TRIM3	Homo sapiens	Tripartite motif-containing protein 3	TRIM3_HUMAN	28	4	29	30	30	25	197.082	35132.2	22201.9	48852.1	18651.3
ULK1	Homo sapiens	Serine/threonine-protein kinase ULK1	ULK1_HUMAN	1	0	1	1	1	1		129.124	88.3307	165.409	90.4447
TULP3	Homo sapiens	Tubby-related protein 3	TULP3_HUMAN	2	0	2	2	2	2		670.464	448.356	784.199	283.117
SLC43A1	Homo sapiens	Large neutral amino acids transporter small subunit 3	LAT3_HUMAN	2	0	2	2	2	2		256.498	303.57	327.413	307.674
CS	Homo sapiens	Citrate synthase, mitochondrial	CISY_HUMAN	9	3	10	9	10	9	365.957	6522	4696.88	6973.91	5081.73
MRPL33	Homo sapiens	Large ribosomal subunit protein bL33m	RM33_HUMAN	5	0	7	7	7	7		5167.01	6019.24	6520.58	5749.08
SEC22B	Homo sapiens	Vesicle-trafficking protein SEC22b	SC22B_HUMAN	16	2	18	17	18	18	36.2494	13221.2	11363	16264.2	11754.1
PRPF40A	Homo sapiens	Pre-mRNA-processing factor 40 homolog A	PR40A_HUMAN	74	3	86	85	86	91	75.1835	383440	279852	392085	1097655
POLQ	Homo sapiens	DNA polymerase theta	DPOLQ_HUMAN	17	0	8	14	15	4		772.132	2170.23	5175.33	380.014
CDC45	Homo sapiens	Cell division control protein 45 homolog	CDC45_HUMAN	8	0	7	7	8	8		1806.26	1462.88	2689.59	1837.85
LRCH4	Homo sapiens	Leucine-rich repeat and calponin homology domain-containing protein 4	LRCH4_HUMAN	24	0	25	25	26	24		10595.8	6885.48	15034.5	9161.28
MTX2	Homo sapiens	Metaxin-2	MTX2_HUMAN	7	0	7	6	5	5		1688.78	1368.66	1832.9	1410.52
VPS26A	Homo sapiens	Vacuolar protein sorting-associated protein 26A	VP26A_HUMAN	8	1	7	7	8	7	15.9413	3079.26	3312.21	4141.5	2313.27
SAP30	Homo sapiens	Histone deacetylase complex subunit SAP30	SAP30_HUMAN	5	0	6	6	6	6		4021.92	3897.48	7592.59	3524.46
MED24	Homo sapiens	Mediator of RNA polymerase II transcription subunit 24	MED24_HUMAN	37	0	42	43	42	37		30172.9	19614.1	38618.5	23023.7
KATNA1	Homo sapiens	Katanin p60 ATPase-containing subunit A1	KTNA1_HUMAN	10	0	10	9	10	7		3304.55	1718.99	5934.08	603.192
E2F6	Homo sapiens	Transcription factor E2F6	E2F6_HUMAN	5	0	5	5	5	3		1509.52	607.997	4032.45	528.487
PSIP1	Homo sapiens	PC4 and SFRS1-interacting protein	PSIP1_HUMAN	37	1	46	48	49	45	0.371201	197624	130431	217862	107284
ERLIN1	Homo sapiens	Erlin-1	ERLN1_HUMAN	13	0	12	12	13	10		4989.04	4736.19	6903.33	4831.92
TADA2A	Homo sapiens	Transcriptional adapter 2-alpha	TAD2A_HUMAN	11	0	10	10	11	8		3324.96	2199.92	6086.34	2634.49
SUPT3H	Homo sapiens	Transcription initiation protein SPT3 homolog	SUPT3_HUMAN	6	0	6	5	5	6		2901.08	1686.88	3658.46	2263.95
NDUFS3	Homo sapiens	NADH dehydrogenase [ubiquinone] iron-sulfur protein 3, mitochondrial	NDUS3_HUMAN	15	0	18	18	18	18		23868.3	19313.5	25122.3	14811.3
SRSF10	Homo sapiens	Serine/arginine-rich splicing factor 10	SRS10_HUMAN	14	0	21	21	22	21		44362.5	17798.9	20314.6	71867.2
ECI2	Homo sapiens	Enoyl-CoA delta isomerase 2	ECI2_HUMAN	19	0	22	21	21	21		11951.3	5958.11	13884.6	8601.32
KHDRBS3	Homo sapiens	KH domain-containing, RNA-binding, signal transduction-associated protein 3	KHDR3_HUMAN	5	0	4	5	4	5		983.48	1237.35	1525.01	3189.45
TADA3	Homo sapiens	Transcriptional adapter 3	TADA3_HUMAN	21	0	24	22	24	24		15213.3	9772.32	20686.3	12828.4
TAF5L	Homo sapiens	TAF5-like RNA polymerase II p300/CBP-associated factor-associated factor 65 kDa subunit 5L	TAF5L_HUMAN	25	1	24	23	24	24	46.3351	18031.1	9864.2	23193.8	13520.6
EED	Homo sapiens	Polycomb protein EED	EED_HUMAN	19	0	21	20	21	20		15438.9	8721.6	25196.3	7870.4
BANF1	Homo sapiens	Barrier-to-autointegration factor	BAF_HUMAN	6	0	6	6	5	6		1246.39	1029.76	3101.46	3207.13
SF3B1	Homo sapiens	Splicing factor 3B subunit 1	SF3B1_HUMAN	191	7	286	286	283	289	422.37	6375515	3.44229e+06	4262718	7.7016e+06
CSDE1	Homo sapiens	Cold shock domain-containing protein E1	CSDE1_HUMAN	98	5	133	102	102	88	425.551	2759741	153323	219061	106951
WBP4	Homo sapiens	WW domain-binding protein 4	WBP4_HUMAN	11	0	13	12	12	13		8920.86	5088.31	6830.04	14594.9
JRK	Homo sapiens	Jerky protein homolog	JERKY_HUMAN	9	0	7	6	8	5		1433.92	703.645	1667.41	785.378
PRKRA	Homo sapiens	Interferon-inducible double-stranded RNA-dependent protein kinase activator A	PRKRA_HUMAN	19	0	20	20	19	19		13588.4	14849.9	16352	17626.3
CRCP	Homo sapiens	DNA-directed RNA polymerase III subunit RPC9	RPC9_HUMAN	4	0	5	5	5	4		2869.34	3426.87	3360.07	168.474
RPS6KA5	Homo sapiens	Ribosomal protein S6 kinase alpha-5	KS6A5_HUMAN	7	0	7	6	7	5		3498.3	2349.25	4605.92	2554.45
MED6	Homo sapiens	Mediator of RNA polymerase II transcription subunit 6	MED6_HUMAN	11	0	10	10	11	11		11758	6691.4	16186.1	8262.43
MYCBP2	Homo sapiens	E3 ubiquitin-protein ligase MYCBP2	MYCB2_HUMAN	101	2	98	90	103	94	34.7338	33793.9	22572.3	51849.6	27821.5
GCAT	Homo sapiens	2-amino-3-ketobutyrate coenzyme A ligase, mitochondrial	KBL_HUMAN	9	1	10	11	11	10	61.4463	3077.58	2875.15	3680.63	4134.99
NPM3	Homo sapiens	Nucleoplasmin-3	NPM3_HUMAN	6	0	7	6	7	7		16333.5	11969	19234.7	18562.1
LYPLA1	Homo sapiens	Acyl-protein thioesterase 1	LYPA1_HUMAN	1	0	1	1	1	1		360.527	516.943	780.106	274.318
ERAL1	Homo sapiens	GTPase Era, mitochondrial	ERAL1_HUMAN	11	0	11	11	11	10		7673.78	5293.21	9810.17	7576.33
CREG1	Homo sapiens	Protein CREG1	CREG1_HUMAN	3	0	3	2	2	3		10856.9	1007.28	706.365	4918.16
SERPINB7	Homo sapiens	Serpin B7	SPB7_HUMAN	2	0	2	2	2	1		141.291	433.249	301.958	164.741
SNRNP200	Homo sapiens	U5 small nuclear ribonucleoprotein 200 kDa helicase	U520_HUMAN	243	16	339	333	343	347	609.965	1.93381e+06	1.37866e+06	2.36795e+06	3460069
TRMU	Homo sapiens	Mitochondrial tRNA-specific 2-thiouridylase 1	MTU1_HUMAN	8	0	7	7	8	7		1975.02	2123.75	3871.23	3290.69
RPS6KA4	Homo sapiens	Ribosomal protein S6 kinase alpha-4	KS6A4_HUMAN	23	1	23	22	25	23	9.17069	8391.13	6493.64	11226.7	7569.14
SURF6	Homo sapiens	Surfeit locus protein 6	SURF6_HUMAN	21	0	25	23	25	24		68828.3	34368.3	88973.4	77282.6
PPM1B	Homo sapiens	Protein phosphatase 1B	PPM1B_HUMAN	20	18	23	19	20	10	44204.2	53126.7	21965.4	21578.5	8467.73
UTP20	Homo sapiens	Small subunit processome component 20 homolog	UTP20_HUMAN	127	1	136	132	140	134	25.2399	128017	78418.4	177456	86403.3
NUP155	Homo sapiens	Nuclear pore complex protein Nup155	NU155_HUMAN	43	1	42	41	45	44	12.9224	23726.1	17589.4	34712.2	24066.3
WDHD1	Homo sapiens	WD repeat and HMG-box DNA-binding protein 1	WDHD1_HUMAN	6	0	5	6	6	4		552.348	574.966	11322.8	370.635
CRTAP	Homo sapiens	Cartilage-associated protein	CRTAP_HUMAN	3	0	2	3	3	3		837.981	481.571	742.895	629.768
SLC25A12	Homo sapiens	Electrogenic aspartate/glutamate antiporter SLC25A12, mitochondrial	S2512_HUMAN	24	2	29	26	25	28	53.6742	16592.2	16433.1	17845.8	14603.7
SLC22A3	Homo sapiens	Solute carrier family 22 member 3	S22A3_HUMAN	4	0	4	4	4	4		4367.64	4062.03	6173.17	3325.84
TCEA3	Homo sapiens	Transcription elongation factor A protein 3	TCEA3_HUMAN	10	0	8	8	10	7		2530.14	1383.46	3121.97	1607.81
ATP6AP2	Homo sapiens	Renin receptor	RENR_HUMAN	7	0	7	7	6	6		1709.49	3032.06	2696.81	6125.36
UGT2B17	Homo sapiens	UDP-glucuronosyltransferase 2B17	UDB17_HUMAN	19	0	20	20	20	19		24134.1	18179.1	28055.5	20831.5
POP7	Homo sapiens	Ribonuclease P protein subunit p20	POP7_HUMAN	8	0	11	11	11	11		24771.9	15001.5	20064.7	14873.9
RPP40	Homo sapiens	Ribonuclease P protein subunit p40	RPP40_HUMAN	19	0	20	21	23	21		20255.7	11483	27289.2	12400.5
ZNF189	Homo sapiens	Zinc finger protein 189	ZN189_HUMAN	5	0	5	4	5	5		905.775	470.674	1081.64	948.003
EIF3G	Homo sapiens	Eukaryotic translation initiation factor 3 subunit G	EIF3G_HUMAN	13	4	12	12	12	11	505.28	3213.54	5642.77	6495.82	3899.02
CBR3;CBR1	Homo sapiens	Carbonyl reductase [NADPH] 3;Carbonyl reductase [NADPH] 1	CBR3_HUMAN;CBR1_HUMAN	2	0	1	2	2	0		92.0958	410.719	136.637
AP1G2	Homo sapiens	AP-1 complex subunit gamma-like 2	AP1G2_HUMAN	15	0	13	12	12	13		34684.2	26886.4	38211.6	23109.9
SC5D	Homo sapiens	Lathosterol oxidase	SC5D_HUMAN	4	0	4	4	3	4		1681.43	1318.44	1783.49	1476.98
IDH1	Homo sapiens	Isocitrate dehydrogenase [NADP] cytoplasmic	IDHC_HUMAN	23	1	25	24	25	17	123.021	17286.2	21047.3	20185.3	3917.06
SCO1	Homo sapiens	Protein SCO1 homolog, mitochondrial	SCO1_HUMAN	4	0	4	4	4	4		1650.14	1703.78	2615.44	1780.37
DGAT1	Homo sapiens	Diacylglycerol O-acyltransferase 1	DGAT1_HUMAN	5	0	5	4	5	5		2788.17	2185.69	3175.81	1868.6
CCNK	Homo sapiens	Cyclin-K	CCNK_HUMAN	15	1	17	19	19	19	6.69901	49523.2	31944.2	59791.6	59793
ARL6IP5	Homo sapiens	PRA1 family protein 3	PRAF3_HUMAN	7	0	7	7	7	6		11204.9	41305.5	25533.8	64156.7
PIAS1	Homo sapiens	E3 SUMO-protein ligase PIAS1	PIAS1_HUMAN	7	0	7	7	7	7		1658.96	1081.35	2010.97	1568.76
PIAS2	Homo sapiens	E3 SUMO-protein ligase PIAS2	PIAS2_HUMAN	7	0	8	8	8	8		2814.36	2183.95	4984.04	2610.28
BCAS2	Homo sapiens	Pre-mRNA-splicing factor SPF27	SPF27_HUMAN	30	0	42	44	45	46		189404	95990.5	213409	307842
DNAJC8	Homo sapiens	DnaJ homolog subfamily C member 8	DNJC8_HUMAN	27	0	40	38	38	39		254015	86356.7	81486.6	212745
SMNDC1	Homo sapiens	Survival of motor neuron-related-splicing factor 30	SPF30_HUMAN	15	0	16	17	17	17		61600.6	37756.4	54644	89378.8
RAD17	Homo sapiens	Cell cycle checkpoint protein RAD17	RAD17_HUMAN	14	0	13	13	13	10		3709.46	2168.4	4534.35	2201.23
ATP5PD	Homo sapiens	ATP synthase subunit d, mitochondrial	ATP5H_HUMAN	9	0	10	11	10	10		9804.83	8233.75	8990.87	6189.97
FLOT1	Homo sapiens	Flotillin-1	FLOT1_HUMAN	30	1	37	37	36	36	17.3932	19727.2	18399.9	33460.6	26404
TRIO	Homo sapiens	Triple functional domain protein	TRIO_HUMAN	15	0	13	12	14	14		1533.21	1469.55	2357.64	1694.77
ATP5MG	Homo sapiens	ATP synthase subunit g, mitochondrial	ATP5L_HUMAN	6	0	6	6	6	6		14016.1	11753.8	14826.1	13738
MPDZ	Homo sapiens	Multiple PDZ domain protein	MPDZ_HUMAN	3	2	2	3	1	0	99.5907	46.9589	137.691	27.3937
RSL1D1	Homo sapiens	Ribosomal L1 domain-containing protein 1	RL1D1_HUMAN	33	0	39	37	40	40		85403.5	33905.3	121613	89533.7
WFS1	Homo sapiens	Wolframin	WFS1_HUMAN	20	0	22	22	22	19		9249.18	8419.52	12419.7	5246.06
CLPX	Homo sapiens	ATP-dependent Clp protease ATP-binding subunit clpX-like, mitochondrial	CLPX_HUMAN	29	0	32	31	33	33		63313.4	50079.7	79726.9	59473
TM7SF2	Homo sapiens	Delta(14)-sterol reductase TM7SF2	ERG24_HUMAN	10	0	11	11	11	10		17582.6	19973.7	26998.6	26595
CIAO1	Homo sapiens	Probable cytosolic iron-sulfur protein assembly protein CIAO1	CIAO1_HUMAN	2	0	2	2	1	2		294.603	313.325	286.398	371.528
SRP72	Homo sapiens	Signal recognition particle subunit SRP72	SRP72_HUMAN	28	0	31	27	28	28		14037.1	8328.81	15749.3	10334.1
JTB	Homo sapiens	Protein JTB	JTB_HUMAN	2	0	2	2	2	2		890.99	765.723	712.873	440.114
RECQL4	Homo sapiens	ATP-dependent DNA helicase Q4	RECQ4_HUMAN	13	0	12	11	13	7		2594.41	2561.01	6427.46	1418.88
RECQL5	Homo sapiens	ATP-dependent DNA helicase Q5	RECQ5_HUMAN	55	0	60	58	58	52		65085.6	35711.9	72469.6	37021.5
B3GAT3	Homo sapiens	Galactosylgalactosylxylosylprotein 3-beta-glucuronosyltransferase 3	B3GA3_HUMAN	14	0	15	14	15	14		8083.23	7621.51	31409.6	5613.43
MTA2	Homo sapiens	Metastasis-associated protein MTA2	MTA2_HUMAN	31	0	36	32	35	34		35572.4	15125.8	55732.7	31535.8
ACTL6B	Homo sapiens	Actin-like protein 6B	ACL6B_HUMAN	5	0	5	5	5	5		23314.8	11144.8	22748.2	19206.4
TOMM70	Homo sapiens	Mitochondrial import receptor subunit TOM70	TOM70_HUMAN	12	0	12	11	12	10		2697.93	1688.47	3918.88	1688.78
IPO13	Homo sapiens	Importin-13	IPO13_HUMAN	1	0	1	1	1	1		92.1524	117.898	132.272	86.0765
MYO1D	Homo sapiens	Unconventional myosin-Id	MYO1D_HUMAN	85	20	97	102	102	96	3005.23	167151	147221	249892	194906
TOX4	Homo sapiens	TOX high mobility group box family member 4	TOX4_HUMAN	16	0	19	19	19	19		81319.1	55165.1	107111	51060
MICAL2	Homo sapiens	[F-actin]-monooxygenase MICAL2	MICA2_HUMAN	8	0	8	8	8	6		2010.42	1558.13	2888.6	1291.08
SUPT7L	Homo sapiens	STAGA complex 65 subunit gamma	ST65G_HUMAN	7	0	9	8	8	8		5511.35	3616.36	9608.23	5107.84
UFL1	Homo sapiens	E3 UFM1-protein ligase 1	UFL1_HUMAN	48	1	55	55	55	54	0.371201	113933	87102.6	145689	103084
SORBS2	Homo sapiens	Sorbin and SH3 domain-containing protein 2	SRBS2_HUMAN	30	0	31	25	32	31		26660.6	17231.2	50357	32169.3
PHF14	Homo sapiens	PHD finger protein 14	PHF14_HUMAN	7	0	5	5	6	7		388.813	527.11	863.374	1606.45
FARP2	Homo sapiens	FERM, ARHGEF and pleckstrin domain-containing protein 2	FARP2_HUMAN	63	0	65	65	68	60		117165	98469.7	174926	66426.3
ZNF432	Homo sapiens	Zinc finger protein 432	ZN432_HUMAN	2	0	3	3	3	3		1625.66	1499.29	3642.89	2060.12
SUN1	Homo sapiens	SUN domain-containing protein 1	SUN1_HUMAN	33	0	38	40	40	38		29065.7	26874	36558.3	29479
ERLIN2	Homo sapiens	Erlin-2	ERLN2_HUMAN	38	0	44	43	44	43		75186.8	69119.8	102568	73657.1
PRPF6	Homo sapiens	Pre-mRNA-processing factor 6	PRP6_HUMAN	93	1	119	122	122	118	29.5469	808928	472483	941380	1.11417e+06
ADGRL1	Homo sapiens	Adhesion G protein-coupled receptor L1	AGRL1_HUMAN	4	0	4	4	4	4		433.705	375.306	763.031	494.646
PCF11	Homo sapiens	Pre-mRNA cleavage complex 2 protein Pcf11	PCF11_HUMAN	91	0	105	102	106	88		298843	132912	583269	154745
FRYL	Homo sapiens	Protein furry homolog-like	FRYL_HUMAN	6	0	6	5	6	5		989.214	544.72	1133.3	686.279
ENDOD1	Homo sapiens	Endonuclease domain-containing 1 protein	ENDD1_HUMAN	9	0	9	8	9	9		3296.2	3204.55	4583.12	3222.02
GLCE	Homo sapiens	D-glucuronyl C5-epimerase	GLCE_HUMAN	12	0	13	13	13	13		3727.19	3257.99	5523.26	2159.35
HAUS5	Homo sapiens	HAUS augmin-like complex subunit 5	HAUS5_HUMAN	4	0	3	4	4	3		458.327	279.336	721.929	755.275
KDM4B	Homo sapiens	Lysine-specific demethylase 4B	KDM4B_HUMAN	28	0	30	27	32	30		19190.6	11463.4	24467.5	10097.2
SOGA1	Homo sapiens	Protein SOGA1	SOGA1_HUMAN	50	0	50	43	51	45		28180.2	12790.1	42926.1	21389.8
AP2A2	Homo sapiens	AP-2 complex subunit alpha-2	AP2A2_HUMAN	39	5	45	44	44	45	679.824	57025	36302	77012.8	56700.4
SEC31A	Homo sapiens	Protein transport protein Sec31A	SC31A_HUMAN	8	1	8	7	7	8	78.9328	2227.11	1944.88	1977.24	2072.08
HEXIM1	Homo sapiens	Protein HEXIM1	HEXI1_HUMAN	5	0	5	4	5	5		988.651	567.556	1192.23	2002.86
TJP3	Homo sapiens	Tight junction protein ZO-3	ZO3_HUMAN	2	0	2	1	2	2		79.5429	50.655	198.106	94.537
DIRAS1	Homo sapiens	GTP-binding protein Di-Ras1	DIRA1_HUMAN	5	0	5	5	3	5		788.405	539.419	804.987	721.879
RPP14	Homo sapiens	Ribonuclease P protein subunit p14	RPP14_HUMAN	10	0	11	11	12	11		44150.4	42938.4	79883	23901.7
CCNB2	Homo sapiens	G2/mitotic-specific cyclin-B2	CCNB2_HUMAN	13	0	13	11	13	13		4399.79	3124.29	6167.46	4530.13
YIF1A	Homo sapiens	Protein YIF1A	YIF1A_HUMAN	4	0	4	4	4	4		1427.7	1593.06	2195	1677.76
UBR5	Homo sapiens	E3 ubiquitin-protein ligase UBR5	UBR5_HUMAN	14	0	13	8	14	10		1435.1	587.884	1837.89	878.994
FSBP	Homo sapiens	Fibrinogen silencer-binding protein	FSBP_HUMAN	1	0	1	1	1	1		148.54	63.1009	172.665	118.409
SCAF4	Homo sapiens	SR-related and CTD-associated factor 4	SCAF4_HUMAN	27	0	34	31	35	33		99858.1	34655.8	75000.5	57734.5
NDUFB6	Homo sapiens	NADH dehydrogenase [ubiquinone] 1 beta subcomplex subunit 6	NDUB6_HUMAN	6	0	8	7	8	7		4027.99	3413.02	4822.32	2212.35
MFN2	Homo sapiens	Mitofusin-2	MFN2_HUMAN	19	0	19	19	19	17		6914.53	6069.98	9032.31	6939.66
DUSP14	Homo sapiens	Dual specificity protein phosphatase 14	DUS14_HUMAN	6	0	5	4	6	5		371.1	433.391	845.198	1144.69
ZFPL1	Homo sapiens	Zinc finger protein-like 1	ZFPL1_HUMAN	4	0	4	4	4	4		1870.53	1110.93	2058.22	973.155
ELP1	Homo sapiens	Elongator complex protein 1	ELP1_HUMAN	19	0	18	16	17	15		3671.59	5023.78	4210.93	2996.62
NDUFB4	Homo sapiens	NADH dehydrogenase [ubiquinone] 1 beta subcomplex subunit 4	NDUB4_HUMAN	7	0	9	9	9	9		42064.5	32905.5	44995.4	37771.8
SCEL	Homo sapiens	Sciellin	SCEL_HUMAN	5	0	1	5	0	0		24.5903	1935.73
NDUFA7	Homo sapiens	NADH dehydrogenase [ubiquinone] 1 alpha subcomplex subunit 7	NDUA7_HUMAN	6	0	8	7	8	7		3132.97	2138.82	3744.5	1576.07
RTN3	Homo sapiens	Reticulon-3	RTN3_HUMAN	3	0	4	4	4	3		990.829	995.122	1274.84	448.981
ZNF205	Homo sapiens	Transcriptional repressor RHIT	RHIT_HUMAN	2	0	2	2	2	1		358.029	251.496	481.65	214.073
LETM1	Homo sapiens	Mitochondrial proton/calcium exchanger protein	LETM1_HUMAN	10	0	10	10	10	9		3904.36	3896.83	3990.83	2780.51
ZRANB2	Homo sapiens	Zinc finger Ran-binding domain-containing protein 2	ZRAB2_HUMAN	10	1	9	9	10	11	7.2721	3184.02	2977.5	4149.13	16436.5
LUC7L3	Homo sapiens	Luc7-like protein 3	LC7L3_HUMAN	17	2	16	15	16	18	28.2447	12634.7	4275.91	13335.7	35941.9
KIF20A	Homo sapiens	Kinesin-like protein KIF20A	KI20A_HUMAN	44	0	48	45	49	46		43792.4	19670.2	42750	26741.7
SPDEF	Homo sapiens	SAM pointed domain-containing Ets transcription factor	SPDEF_HUMAN	3	0	2	3	3	3		292.971	538.276	796.564	458.494
KIF4A	Homo sapiens	Chromosome-associated kinesin KIF4A	KIF4A_HUMAN	46	1	46	42	48	42	0.371189	21558	14078.5	33217.7	14751.5
MBD4	Homo sapiens	Methyl-CpG-binding domain protein 4	MBD4_HUMAN	26	0	26	24	25	22		15942.5	8025.45	16910.9	8475.93
SBF1	Homo sapiens	Myotubularin-related protein 5	MTMR5_HUMAN	48	0	44	39	48	37		22207.8	14898	32275.9	19934.2
GOSR1	Homo sapiens	Golgi SNAP receptor complex member 1	GOSR1_HUMAN	10	0	8	8	10	10		4056.97	4076.65	6127.06	4225.66
KAT7	Homo sapiens	Histone acetyltransferase KAT7	KAT7_HUMAN	21	0	22	20	21	20		10849.9	8204.13	16015.1	9344.63
ABCC6	Homo sapiens	ATP-binding cassette sub-family C member 6	MRP6_HUMAN	1	0	1	1	1	1		507.028	418.561	873.701	643.462
VAPB	Homo sapiens	Vesicle-associated membrane protein-associated protein B/C	VAPB_HUMAN	22	0	27	27	27	23		32181	24976	46682.8	27652.8
NDUFC2	Homo sapiens	NADH dehydrogenase [ubiquinone] 1 subunit C2	NDUC2_HUMAN	4	0	4	4	4	3		1549.14	1448.86	2560.8	1575.08
NDUFA10	Homo sapiens	NADH dehydrogenase [ubiquinone] 1 alpha subcomplex subunit 10, mitochondrial	NDUAA_HUMAN	17	0	19	19	18	17		14043.9	8963.59	14410.1	10187
SMC2	Homo sapiens	Structural maintenance of chromosomes protein 2	SMC2_HUMAN	59	0	68	67	68	67		61149.7	44749.2	73017.5	56815.3
FARS2	Homo sapiens	Phenylalanine--tRNA ligase, mitochondrial	SYFM_HUMAN	1	0	1	1	1	0		20.2562	6.54626	38.2751
ZBTB7A	Homo sapiens	Zinc finger and BTB domain-containing protein 7A	ZBT7A_HUMAN	9	0	10	9	10	6		1949.31	1967.5	4243.91	922.706
IPO7	Homo sapiens	Importin-7	IPO7_HUMAN	30	1	29	30	32	30	86.9756	17607	16426.9	29620.7	13769.5
SLU7	Homo sapiens	Pre-mRNA-splicing factor SLU7	SLU7_HUMAN	29	0	29	28	26	31		14362.9	13749.3	16500.6	44678.5
CD2BP2	Homo sapiens	CD2 antigen cytoplasmic tail-binding protein 2	CD2B2_HUMAN	15	0	16	14	16	16		52542.1	27586.6	60312.8	66573.3
MED26	Homo sapiens	Mediator of RNA polymerase II transcription subunit 26	MED26_HUMAN	15	0	16	16	16	13		10403.8	5439.95	12346.3	4154.79
ZIC2	Homo sapiens	Zinc finger protein ZIC 2	ZIC2_HUMAN	8	0	10	9	10	9		12486.1	11335.5	14023.4	9569.5
SVIL	Homo sapiens	Supervillin	SVIL_HUMAN	32	5	28	25	29	27	298.54	5072.88	3425.34	8126.01	5138.12
PIGN	Homo sapiens	GPI ethanolamine phosphate transferase 1	PIGN_HUMAN	8	0	7	6	8	5		960.589	913.464	1861.88	702.976
AHSA1	Homo sapiens	Activator of 90 kDa heat shock protein ATPase homolog 1	AHSA1_HUMAN	4	0	4	4	4	4		1047.94	761.083	1293.91	703.009
PARN	Homo sapiens	Poly(A)-specific ribonuclease PARN	PARN_HUMAN	12	1	11	11	11	10	4779.59	7226.67	6909.85	8110.09	6890.04
SGPL1	Homo sapiens	Sphingosine-1-phosphate lyase 1	SGPL1_HUMAN	32	0	39	38	38	37		168281	132861	114932	180835
CLDN7	Homo sapiens	Claudin-7	CLD7_HUMAN	1	0	2	2	2	2		320.054	332.228	632.557	316.929
CTDNEP1	Homo sapiens	CTD nuclear envelope phosphatase 1	CNEP1_HUMAN	5	0	5	5	5	5		2052.91	2178.41	3378.69	2428.84
NSA2	Homo sapiens	Ribosome biogenesis protein NSA2 homolog	NSA2_HUMAN	13	0	18	18	18	18		21854.6	15643.6	30186.1	26896.2
SEC24A	Homo sapiens	Protein transport protein Sec24A	SC24A_HUMAN	5	0	5	3	5	5		677.864	298.845	1070.73	1342.03
SEC24B	Homo sapiens	Protein transport protein Sec24B	SC24B_HUMAN	8	0	5	8	8	8		1620.69	1904.94	3734.41	2877.17
CBX6	Homo sapiens	Chromobox protein homolog 6	CBX6_HUMAN	17	0	18	17	17	17		21770.7	14266.5	27156.9	17452.3
MPC2	Homo sapiens	Mitochondrial pyruvate carrier 2	MPC2_HUMAN	8	0	8	8	8	8		6668.84	4021.01	6938.14	8391.94
ACSL3	Homo sapiens	Fatty acid CoA ligase Acsl3	ACSL3_HUMAN	21	0	18	19	21	18		4983.95	4835.64	7175.46	4978.14
POLR1A	Homo sapiens	DNA-directed RNA polymerase I subunit RPA1	RPA1_HUMAN	147	1	174	168	175	169	2.05618	378637	232861	542402	296683
PCNT	Homo sapiens	Pericentrin	PCNT_HUMAN	10	0	10	6	10	7		6672.46	6872.41	7901.84	556.647
YEATS4	Homo sapiens	YEATS domain-containing protein 4	YETS4_HUMAN	16	0	21	20	21	20		18955.1	10673.3	25006.6	12018.4
ZBTB11	Homo sapiens	Zinc finger and BTB domain-containing protein 11	ZBT11_HUMAN	17	0	15	13	17	13		2822.21	1717.2	6021.87	2800.62
CPSF4	Homo sapiens	Cleavage and polyadenylation specificity factor subunit 4	CPSF4_HUMAN	32	1	39	41	39	43	5.76337	94117.1	236341	159980	609471
NFATC1	Homo sapiens	Nuclear factor of activated T-cells, cytoplasmic 1	NFAC1_HUMAN	7	0	7	6	5	5		879.098	571.401	650.095	689.624
KRT75	Homo sapiens	Keratin, type II cytoskeletal 75	K2C75_HUMAN	6	1	7	8	8	8	155.298	63901.9	73276.3	103122	82150.7
BRD1	Homo sapiens	Bromodomain-containing protein 1	BRD1_HUMAN	17	0	17	16	17	17		7980.13	5038.45	12644.7	8694.23
POP4	Homo sapiens	Ribonuclease P protein subunit p29	RPP29_HUMAN	11	0	16	15	16	14		18949.1	7272.28	26827.1	12059
HERC2	Homo sapiens	E3 ubiquitin-protein ligase HERC2	HERC2_HUMAN	112	0	109	100	106	101		62962	35812.1	84703.3	43997.3
RAB3D	Homo sapiens	Ras-related protein Rab-3D	RAB3D_HUMAN	1	0	1	1	1	1		616.634	793.434	567.343	547.708
OXSR1	Homo sapiens	Serine/threonine-protein kinase OSR1	OXSR1_HUMAN	3	0	3	3	3	3		532.364	504.459	499.373	526.791
PTBP3	Homo sapiens	Polypyrimidine tract-binding protein 3	PTBP3_HUMAN	31	0	45	45	40	45		223480	220057	82883	555215
STARD3NL	Homo sapiens	STARD3 N-terminal-like protein	STR3N_HUMAN	1	0	1	1	1	1		162.492	121.414	286.559	80.442
LSM8	Homo sapiens	U6 snRNA-associated Sm-like protein LSm8	LSM8_HUMAN	10	1	11	9	9	9	22.9424	81130.4	10425.4	16226	34187.4
AP2A1	Homo sapiens	AP-2 complex subunit alpha-1	AP2A1_HUMAN	67	11	79	76	79	77	1649.9	232166	148986	286466	234786
WIZ	Homo sapiens	Protein Wiz	WIZ_HUMAN	50	0	56	56	58	54		88259.1	63777.1	124841	81079.1
ZMYM6	Homo sapiens	Zinc finger MYM-type protein 6	ZMYM6_HUMAN	9	0	9	7	9	8		1307.12	856.783	1857.91	1145.43
STAU1	Homo sapiens	Double-stranded RNA-binding protein Staufen homolog 1	STAU1_HUMAN	42	0	54	53	50	54		136489	108113	85793.8	86803.8
TMEM50A	Homo sapiens	Transmembrane protein 50A	TM50A_HUMAN	1	0	1	1	1	1		224.169	198.736	360.192	169.844
BAG2	Homo sapiens	BAG family molecular chaperone regulator 2	BAG2_HUMAN	14	1	14	13	15	14	5.72945	5382.75	3710.79	6656.17	6975.07
MAP4K4	Homo sapiens	Mitogen-activated protein kinase kinase kinase kinase 4	M4K4_HUMAN	33	3	31	37	35	32	45.7225	25655.6	16290.3	35345.3	20934.2
AIFM1	Homo sapiens	Apoptosis-inducing factor 1, mitochondrial	AIFM1_HUMAN	31	2	31	34	35	34	190.254	36126	29353.6	43761.6	34364.8
LATS1	Homo sapiens	Serine/threonine-protein kinase LATS1	LATS1_HUMAN	10	0	8	8	9	9		2067.94	2136.21	2595.97	2528.82
FADS2	Homo sapiens	Acyl-CoA 6-desaturase	FADS2_HUMAN	13	0	17	17	17	16		23534	20503	30797.7	21542.4
LY6G6C	Homo sapiens	Lymphocyte antigen 6 complex locus protein G6c	LY66C_HUMAN	1	0	0	1	1	1			617.03	571.242	119.78
ABHD16A	Homo sapiens	Phosphatidylserine lipase ABHD16A	ABHGA_HUMAN	4	0	4	3	2	4		677.044	407.253	341.399	408.623
GPANK1	Homo sapiens	G patch domain and ankyrin repeat-containing protein 1	GPAN1_HUMAN	12	0	11	11	10	11		2256.81	2739.42	2327.42	5775.62
TRUB2	Homo sapiens	Pseudouridylate synthase TRUB2, mitochondrial	TRUB2_HUMAN	13	0	13	12	12	13		3831.57	2960.55	5589.69	4245.6
SYF2	Homo sapiens	Pre-mRNA-splicing factor SYF2	SYF2_HUMAN	19	0	23	24	22	26		13077.4	17117.5	16366.3	66241.4
CBX7	Homo sapiens	Chromobox protein homolog 7	CBX7_HUMAN	4	0	3	3	4	3		806.309	547.078	1350.46	564.059
ONECUT2	Homo sapiens	One cut domain family member 2	ONEC2_HUMAN	7	0	7	7	7	7		2774.38	2828.55	4104.6	3377.31
SCGB1D2	Homo sapiens	Secretoglobin family 1D member 2	SG1D2_HUMAN	1	0	1	1	1	1		624.865	820.302	757.631	894.31
MBD3	Homo sapiens	Methyl-CpG-binding domain protein 3	MBD3_HUMAN	7	0	7	6	7	7		3460.12	1679.61	3240.47	3261.2
TOP3B	Homo sapiens	DNA topoisomerase 3-beta-1	TOP3B_HUMAN	29	0	29	27	30	25		15767.8	9658.75	29964.9	12986.2
APC2	Homo sapiens	Adenomatous polyposis coli protein 2	APCL_HUMAN	3	0	3	0	2	2		246.693		275.136	211.282
NDUFB10	Homo sapiens	NADH dehydrogenase [ubiquinone] 1 beta subcomplex subunit 10	NDUBA_HUMAN	12	0	12	13	13	11		19457.3	21880.9	29001.9	19565.6
ZBED1	Homo sapiens	E3 SUMO-protein ligase ZBED1	ZBED1_HUMAN	2	0	2	2	2	2		206.435	279.494	632.016	246.035
TOMM40	Homo sapiens	Mitochondrial import receptor subunit TOM40 homolog	TOM40_HUMAN	23	0	28	28	29	28		62323	58970.1	77844	61995.6
PEX11B	Homo sapiens	Peroxisomal membrane protein 11B	PX11B_HUMAN	9	0	7	9	9	9		1744.2	1957.39	2992.21	1933.07
PAK4	Homo sapiens	Serine/threonine-protein kinase PAK 4	PAK4_HUMAN	35	0	43	42	43	40		119447	58522.4	150887	47162.7
ACTL6A	Homo sapiens	Actin-like protein 6A	ACL6A_HUMAN	31	4	36	33	34	35	614.671	69873.7	49387.7	95712.7	71104.1
NSD2	Homo sapiens	Histone-lysine N-methyltransferase NSD2	NSD2_HUMAN	51	0	54	49	54	52		35854.2	25882.2	49526.6	29462.4
LDHA	Homo sapiens	L-lactate dehydrogenase A chain	LDHA_HUMAN	29	3	33	34	34	31	1484.59	55376.7	51699	70100.3	58568.2
GLUD1	Homo sapiens	Glutamate dehydrogenase 1, mitochondrial	DHE3_HUMAN	42	7	51	47	51	47	558.37	155745	86525.4	192094	141181
DHFR	Homo sapiens	Dihydrofolate reductase	DYR_HUMAN	9	0	10	9	10	8		7775.95	5519.48	11147.9	5743.97
CYB5R3	Homo sapiens	NADH-cytochrome b5 reductase 3	NB5R3_HUMAN	6	0	7	7	7	6		1216.43	1268.07	1973.76	1517.33
GSR	Homo sapiens	Glutathione reductase, mitochondrial	GSHR_HUMAN	5	1	4	5	5	5	37.946	1397.35	1604.49	4500.24	4047.98
MT-CO1	Homo sapiens	Cytochrome c oxidase subunit 1	COX1_HUMAN	2	0	2	2	2	2		357.377	419.429	610.545	342.136
MT-CO2	Homo sapiens	Cytochrome c oxidase subunit 2	COX2_HUMAN	11	0	12	12	12	11		23486.2	20091.4	28560	21676.7
CP	Homo sapiens	Ceruloplasmin	CERU_HUMAN	8	5	6	5	3	2	581.047	1462.82	717.185	473.246	342.834
PNP	Homo sapiens	Purine nucleoside phosphorylase	PNPH_HUMAN	8	0	9	9	9	8		1345.09	4651.71	3151.48	1858.29
GOT2	Homo sapiens	Aspartate aminotransferase, mitochondrial	AATM_HUMAN	14	3	14	11	13	13	348.742	4912.66	3009.21	3676.31	3300.26
ABL1	Homo sapiens	Tyrosine-protein kinase ABL1	ABL1_HUMAN	23	0	24	24	22	20		7709.56	3726.65	8191.99	3459.37
EGFR	Homo sapiens	Epidermal growth factor receptor	EGFR_HUMAN	9	0	7	7	8	9		1423.65	2104.38	2435.3	3439.17
PGK1	Homo sapiens	Phosphoglycerate kinase 1	PGK1_HUMAN	6	1	6	6	5	6	204.757	1821.23	3457.98	1213.53	1020.76
AK1	Homo sapiens	Adenylate kinase isoenzyme 1	KAD1_HUMAN	2	0	2	2	2	2		227.181	408.046	414.953	267.363
F2	Homo sapiens	Prothrombin	THRB_HUMAN	3	0	3	2	3	2		1227.7	1283.93	2101.14	759.096
HP	Homo sapiens	Haptoglobin	HPT_HUMAN	11	1	11	9	7	6	302.979	17055.3	3992.15	1781.65	911.168
F10	Homo sapiens	Coagulation factor X	FA10_HUMAN	4	0	4	4	4	3		4157.95	3106.94	5558.26	4556.75
MT-ATP6	Homo sapiens	ATP synthase subunit a	ATP6_HUMAN	1	0	1	1	1	1		10604.6	10437.5	14786	8224.61
SERPINC1	Homo sapiens	Antithrombin-III	ANT3_HUMAN	3	0	3	1	2	2		978.028	144.763	314.317	133.461
SERPINA1	Homo sapiens	Alpha-1-antitrypsin	A1AT_HUMAN	11	3	12	12	6	4	164.144	14407	3915.74	876.352	485.233
SERPINA3	Homo sapiens	Alpha-1-antichymotrypsin	AACT_HUMAN	5	0	5	5	0	2		1776.27	886.96		60.5387
AGT	Homo sapiens	Angiotensinogen	ANGT_HUMAN	1	0	1	0	0	0		20.8024
A2M	Homo sapiens	Alpha-2-macroglobulin	A2MG_HUMAN	26	8	24	18	13	4	2174.61	11679.2	4413.52	1992.62	1908.86
C3	Homo sapiens	Complement C3	CO3_HUMAN	43	9	44	33	16	11	1407.69	23503	6204.27	2276.49	8667.46
CSTA	Homo sapiens	Cystatin-A	CYTA_HUMAN	11	0	11	12	12	10		10836.6	22550	14478.7	7695.25
KNG1	Homo sapiens	Kininogen-1	KNG1_HUMAN	2	0	2	2	0	0		1432.71	283.621
NRAS	Homo sapiens	GTPase NRas	RASN_HUMAN	1	0	0	0	1	0				165.155
KRAS	Homo sapiens	GTPase KRas	RASK_HUMAN	19	17	17	13	13	11	25441.2	75656.1	19561.9	25241	7002.56
JCHAIN	Homo sapiens	Immunoglobulin J chain	IGJ_HUMAN	1	0	1	1	1	1		291.462	1118.91	325.438	376.622
IGKV3-20	Homo sapiens	Immunoglobulin kappa variable 3-20	KV320_HUMAN	2	0	2	2	0	0		1853.62	624.495
PIGR	Homo sapiens	Polymeric immunoglobulin receptor	PIGR_HUMAN	5	0	3	5	4	4		380.728	3194.65	797.201	788.173
IGKC	Homo sapiens	Immunoglobulin kappa constant	IGKC_HUMAN	5	3	5	6	6	4	73.1145	5169.49	3743.68	990.907	769.996
IGHG1;	Homo sapiens	Immunoglobulin heavy constant gamma 1;Immunoglobulin gamma-1 heavy chain	IGHG1_HUMAN;IGG1_HUMAN	14	7	15	17	12	14	959.683	94722.4	47652.2	40628.1	46555.9
IGHG2	Homo sapiens	Immunoglobulin heavy constant gamma 2	IGHG2_HUMAN	4	2	4	4	4	1	419.196	2142.6	1325.7	706.574	407.703
IGHG4	Homo sapiens	Immunoglobulin heavy constant gamma 4	IGHG4_HUMAN	1	1	1	1	1	1	226.997	364.55	427.05	204.93	292.524
IGHM	Homo sapiens	Immunoglobulin heavy constant mu	IGHM_HUMAN	8	1	8	6	3	2	387.871	5872.23	2111.71	1109.01	834.697
IGHA1	Homo sapiens	Immunoglobulin heavy constant alpha 1	IGHA1_HUMAN	8	0	9	9	9	7		19150.8	28202.3	8835.71	5932.11
HLA-H;HLA-A	Homo sapiens	Putative HLA class I histocompatibility antigen, alpha chain H;HLA class I histocompatibility antigen, A alpha chain	HLAH_HUMAN;HLAA_HUMAN	2	0	2	2	2	2		564.986	550.715	719.599	532.866
CRYAB	Homo sapiens	Alpha-crystallin B chain	CRYAB_HUMAN	6	1	6	6	2	5	154.584	404.098	638.358	116.923	323.965
LMNA	Homo sapiens	Prelamin-A/C	LMNA_HUMAN	82	4	106	109	108	105	301.504	497581	510466	593962	556487
APOA1	Homo sapiens	Apolipoprotein A-I	APOA1_HUMAN	13	1	14	14	4	5	17.7511	6761.18	1151.98	98.8693	267.494
FGA	Homo sapiens	Fibrinogen alpha chain	FIBA_HUMAN	10	1	11	7	4	0	49.2868	3903.38	790.185	762.741
FGB	Homo sapiens	Fibrinogen beta chain	FIBB_HUMAN	17	8	15	13	8	3	3662.14	21455.3	6683.29	2416.51	492.646
FGG	Homo sapiens	Fibrinogen gamma chain	FIBG_HUMAN	11	2	10	10	4	2	136.927	8798.51	2370.32	597.259	111.578
MBP	Homo sapiens	Myelin basic protein	MBP_HUMAN	1	0	1	1	1	1		314.234	349.257	309.069	218.27
FN1	Homo sapiens	Fibronectin	FINC_HUMAN	81	0	89	86	90	86		93311.4	65752.7	131062	84174.4
ORM1	Homo sapiens	Alpha-1-acid glycoprotein 1	A1AG1_HUMAN	3	1	3	2	1	1	24.2368	1554.68	419.89	112.17	87.7914
AHSG	Homo sapiens	Alpha-2-HS-glycoprotein	FETUA_HUMAN	2	0	2	2	1	1		212.436	199.878	137.462	118.478
TTR	Homo sapiens	Transthyretin	TTHY_HUMAN	2	1	2	2	2	0	46.157	790.401	313.912	116.098
TFRC	Homo sapiens	Transferrin receptor protein 1	TFR1_HUMAN	31	0	30	32	32	31		21977.6	17814.9	31268	19992.3
TF	Homo sapiens	Serotransferrin	TRFE_HUMAN	16	6	16	15	6	5	243.203	14870.2	4387	708.521	354.238
LTF	Homo sapiens	Lactotransferrin	TRFL_HUMAN	13	0	13	13	13	12		16708.1	23253.6	10606	5336.9
MT-ND1	Homo sapiens	NADH-ubiquinone oxidoreductase chain 1	NU1M_HUMAN	4	0	4	4	4	4		3885.55	3853.33	4748.46	3318.22
MT-ND2	Homo sapiens	NADH-ubiquinone oxidoreductase chain 2	NU2M_HUMAN	1	0	1	1	1	1		932.823	836.14	1128.59	540.8
MT-ND4	Homo sapiens	NADH-ubiquinone oxidoreductase chain 4	NU4M_HUMAN	5	0	5	5	5	5		2201.66	2014.53	3287.78	1140.88
MT-ND5	Homo sapiens	NADH-ubiquinone oxidoreductase chain 5	NU5M_HUMAN	4	0	4	4	4	4		1502.48	1975.93	2665.75	1231.56
AMH	Homo sapiens	Muellerian-inhibiting factor	MIS_HUMAN	6	0	5	5	6	5		2192.55	1412.09	1391.75	2528.69
SLPI	Homo sapiens	Antileukoproteinase	SLPI_HUMAN	5	0	6	6	6	5		4399.34	4143.81	7412.34	2293.09
VTN	Homo sapiens	Vitronectin	VTNC_HUMAN	1	0	1	1	1	1		1538.9	867.923	1350.33	864.695
HMGCR	Homo sapiens	3-hydroxy-3-methylglutaryl-coenzyme A reductase	HMDH_HUMAN	6	0	7	4	6	5		626.165	305.169	1063.44	484.957
CAT	Homo sapiens	Catalase	CATA_HUMAN	27	2	26	27	28	23	148.716	8636.33	19127.5	12295.5	7178.4
RAF1	Homo sapiens	RAF proto-oncogene serine/threonine-protein kinase	RAF1_HUMAN	12	0	12	8	12	11		3302.42	2391.79	3538.18	2869.86
GBA1	Homo sapiens	Lysosomal acid glucosylceramidase	GBA1_HUMAN	9	0	8	9	9	8		1334.38	1806.36	2061.12	1133.93
ALDOA	Homo sapiens	Fructose-bisphosphate aldolase A	ALDOA_HUMAN	19	3	17	16	19	20	209.186	6577.08	10395.3	9138.35	27451.8
CSTB	Homo sapiens	Cystatin-B	CYTB_HUMAN	5	0	1	6	2	2		78.0358	18924.9	257.024	229.33
ANXA1	Homo sapiens	Annexin A1	ANXA1_HUMAN	26	1	12	32	15	14	28.6818	856.353	93151.1	1395.8	602.725
APOB	Homo sapiens	Apolipoprotein B-100	APOB_HUMAN	8	1	6	3	3	3	49.0367	1622.25	156.904	458.233	519.424
PRNP	Homo sapiens	Major prion protein	PRIO_HUMAN	4	0	4	4	4	4		1544.38	1152.13	1933.45	1432.9
HRG	Homo sapiens	Histidine-rich glycoprotein	HRG_HUMAN	1	0	1	1	0	0		209.433	100.728
SEMG1;SEMG2	Homo sapiens	Semenogelin-1;Semenogelin-2	SEMG1_HUMAN;SEMG2_HUMAN	1	0	0	1	0	0			59.9865
TUBB4A	Homo sapiens	Tubulin beta-4A chain	TBB4A_HUMAN	4	0	4	4	4	4		993.415	785.227	790.44	793.347
GAPDH	Homo sapiens	Glyceraldehyde-3-phosphate dehydrogenase	G3P_HUMAN	44	7	50	55	51	56	1485.57	111675	386894	207829	525225
ERBB2	Homo sapiens	Receptor tyrosine-protein kinase erbB-2	ERBB2_HUMAN	24	0	25	25	25	24		10286.8	8626.26	14383.3	10250.3
CAPNS1	Homo sapiens	Calpain small subunit 1	CPNS1_HUMAN	4	2	4	4	3	2	250.233	306.499	375.895	431.061	154.252
HSPB1	Homo sapiens	Heat shock protein beta-1	HSPB1_HUMAN	18	1	19	22	21	20	0.371195	65072.6	98449.5	87739.5	82465.1
RPN1	Homo sapiens	Dolichyl-diphosphooligosaccharide--protein glycosyltransferase subunit 1	RPN1_HUMAN	44	3	56	55	55	54	336.642	220949	187987	275710	169463
RPN2	Homo sapiens	Dolichyl-diphosphooligosaccharide--protein glycosyltransferase subunit 2	RPN2_HUMAN	32	3	39	41	41	40	290.183	85725	82050	116948	78717.8
GNAI2	Homo sapiens	Guanine nucleotide-binding protein G(i) subunit alpha-2	GNAI2_HUMAN	2	2	2	3	2	2	196.12	677.383	622.479	633.188	539.064
H2AC4;H2AC25;H2AC6	Homo sapiens	Histone H2A type 1-B/E;Histone H2A type 3;Histone H2A type 1-C	H2A1B_HUMAN;H2A3_HUMAN;H2A1C_HUMAN	7	1	12	11	12	12	0.371195	576461	444149	890328	596186
SLC4A2	Homo sapiens	Anion exchange protein 2	B3A2_HUMAN	8	0	7	8	7	6		3302.4	3450.99	4994.09	2953.49
ATP1A1	Homo sapiens	Sodium/potassium-transporting ATPase subunit alpha-1	AT1A1_HUMAN	53	10	63	59	63	58	1782.33	142161	114358	179373	100351
ATP1B1	Homo sapiens	Sodium/potassium-transporting ATPase subunit beta-1	AT1B1_HUMAN	8	0	9	9	9	9		16737.9	12613.6	20845.7	12471.3
ARG1	Homo sapiens	Arginase-1	ARGI1_HUMAN	21	0	23	24	22	24		19863.3	48340.6	32752.5	18915.7
APOD	Homo sapiens	Apolipoprotein D	APOD_HUMAN	3	0	2	3	3	2		874.372	839.317	919.721	819.865
ALDH2	Homo sapiens	Aldehyde dehydrogenase, mitochondrial	ALDH2_HUMAN	7	5	7	8	5	5	776.129	1740.68	1377.21	942.631	536.838
S100A8	Homo sapiens	Protein S100-A8	S10A8_HUMAN	10	0	10	12	11	10		7559.19	46165	8315.83	6571.56
HMGN1	Homo sapiens	Non-histone chromosomal protein HMG-14	HMGN1_HUMAN	8	0	9	9	9	9		22764.1	11552.2	21373.2	6932.47
SERPINB2	Homo sapiens	Plasminogen activator inhibitor 2	PAI2_HUMAN	6	0	3	6	5	4		197.944	3067.05	1216.22	293.711
SLC25A5	Homo sapiens	ADP/ATP translocase 2	ADT2_HUMAN	58	11	83	84	83	82	4046.33	3870917	3236656	4.7024e+06	3748118
SERPING1	Homo sapiens	Plasma protease C1 inhibitor	IC1_HUMAN	2	0	2	1	0	0		252.214	65.6052
MPO	Homo sapiens	Myeloperoxidase	PERM_HUMAN	3	0	0	3	0	0			1081.59
PCCA	Homo sapiens	Propionyl-CoA carboxylase alpha chain, mitochondrial	PCCA_HUMAN	70	0	85	85	87	85		263788	312598	313591	325834
PCCB	Homo sapiens	Propionyl-CoA carboxylase beta chain, mitochondrial	PCCB_HUMAN	37	2	42	43	44	43	94.8561	94937	96225.9	106829	116430
EIF2S1	Homo sapiens	Eukaryotic translation initiation factor 2 subunit 1	IF2A_HUMAN	37	4	46	45	46	45	129.479	117455	69175.9	159323	103069
HMGN2	Homo sapiens	Non-histone chromosomal protein HMG-17	HMGN2_HUMAN	8	0	12	13	12	11		11506.7	6360.49	11296	3663.07
RPLP1	Homo sapiens	Large ribosomal subunit protein P1	RLA1_HUMAN	4	1	5	5	5	5	103.674	15908.5	11464.9	21123.6	28136.6
RPLP2	Homo sapiens	Large ribosomal subunit protein P2	RLA2_HUMAN	13	0	21	20	21	21		444740	304832	572273	622760
RPLP0	Homo sapiens	Large ribosomal subunit protein uL10	RLA0_HUMAN	28	3	41	41	41	40	505.089	528524	381950	626590	598285
JUN	Homo sapiens	Transcription factor Jun	JUN_HUMAN	9	0	11	11	11	6		6335.46	4829.63	6254.92	1480.49
FABP3	Homo sapiens	Fatty acid-binding protein, heart	FABPH_HUMAN	4	0	4	4	4	4		3500.93	2404.36	2551.01	3020.13
POLR3D	Homo sapiens	DNA-directed RNA polymerase III subunit RPC4	RPC4_HUMAN	10	0	10	10	10	9		9814.33	7694.67	11075.3	4495.85
SSB	Homo sapiens	Lupus La protein	LA_HUMAN	53	0	76	70	72	70		298806	143252	165067	193319
ATP5MC1;ATP5MC3;ATP5MC2	Homo sapiens	ATP synthase F(0) complex subunit C1, mitochondrial;ATP synthase F(0) complex subunit C3, mitochondrial;ATP synthase F(0) complex subunit C2, mitochondrial	AT5G1_HUMAN;AT5G3_HUMAN;AT5G2_HUMAN	1	1	1	1	1	1	691.094	437.632	236.783	462.852	337.848
ITGB1	Homo sapiens	Integrin beta-1	ITB1_HUMAN	4	3	3	2	3	0	795.248	937.136	1492.49	1228.63
KRT8	Homo sapiens	Keratin, type II cytoskeletal 8	K2C8_HUMAN	82	6	119	118	117	119	1383.59	1.19856e+06	1.13664e+06	1.77275e+06	1.67381e+06
MYL1	Homo sapiens	Myosin light chain 1/3, skeletal muscle isoform	MYL1_HUMAN	1	0	1	1	1	1		637.822	451.861	702.082	562.222
BCHE	Homo sapiens	Cholinesterase	CHLE_HUMAN	6	0	3	6	4	3		496.864	2770.67	546.483	412.995
GSN	Homo sapiens	Gelsolin	GELS_HUMAN	23	11	25	25	23	25	12985	22777	12637.7	14092.7	9255.47
RB1	Homo sapiens	Retinoblastoma-associated protein	RB_HUMAN	42	0	43	45	46	44		40137.9	30957.6	58182.7	32154.4
CDK1	Homo sapiens	Cyclin-dependent kinase 1	CDK1_HUMAN	33	0	39	42	43	39		157669	136806	188944	155083
ATP5F1B	Homo sapiens	ATP synthase subunit beta, mitochondrial	ATPB_HUMAN	40	14	46	46	47	45	4814.33	101284	100235	115046	75600.2
S100A9	Homo sapiens	Protein S100-A9	S10A9_HUMAN	13	0	13	17	12	11		7292.91	39947.7	6408.05	5502.07
S100A6	Homo sapiens	Protein S100-A6	S10A6_HUMAN	1	0	0	1	0	0			481.81
EIF4E	Homo sapiens	Eukaryotic translation initiation factor 4E	IF4E_HUMAN	8	0	9	9	9	9		14460.3	8204.84	19447.3	9734.51
CKM	Homo sapiens	Creatine kinase M-type	KCRM_HUMAN	5	1	5	5	4	5	111.455	1422.99	990.906	998.141	986.571
[truncated: 4,452 more rows]
